# Supplementary material for: Loss of epigenetic suppression of retrotransposons with oncogenic potential in aging mammary luminal epithelial cells
Source: HighWire-hosted journal article supplement (doi:10.1101/gr.277511.122), 2023-07-18
Supplement: Supplemental_Table_S4.xlsx [file Supplemental_Table_S4.xlsx]

## Sheet: Table_S4
Table S4: TE subfamilies significantly enriched in ATAC-seq peaks in young LEps
TE subfamily	log(enrichment)	pval	total number of elements	No. of overlaps	Mean of overlaps for random regions	Percentage overlaps
LTR18A	3.32606	0	198	77	7.678	38.8889
LTR13_	3.08443	0	44	19	2.24	43.1818
LTR18C	3.03094	0	77	23	2.814	29.8701
LTR13	2.89648	0	466	211	28.337	45.279
LTR10F	2.87063	0	449	139	19.005	30.9577
LTR10A	2.80195	0	311	94	13.479	30.2251
LTR3B	2.65054	0	90	23	3.663	25.5556
LTR18B	2.52174	0	367	90	15.672	24.5232
LTR10C	2.44247	0	519	125	22.996	24.0848
MER11D	2.30285	0	260	74	14.997	28.4615
MER44B	2.2793	0	2126	388	79.927	18.2502
LTR10G	2.00491	0	116	20	4.983	17.2414
LTR35A	1.94223	0	93	14	3.643	15.0538
LTR10B1	1.93722	0	171	25	6.528	14.6199
LTR3B_	1.9342	0	264	36	9.42	13.6364
LTR47B4	1.9342	0	105	15	3.925	14.2857
LTR41B	1.87261	0	848	115	31.404	13.5613
MER44C	1.86352	0	1091	179	49.19	16.407
Eulor5A	1.85689	0	126	14	3.865	11.1111
MER57E3	1.84388	0	243	28	7.8	11.5226
LTR41	1.73421	0	1129	143	42.982	12.6661
LTR4	1.72929	0	102	15	4.524	14.7059
Tigger7	1.68215	0	2944	314	97.848	10.6658
MER130	1.66248	0	181	19	6.002	10.4972
MER66C	1.63228	0	589	64	20.645	10.8659
MER44D	1.61287	0	638	75	24.521	11.7555
HERVL18-int	1.60715	0	504	89	29.214	17.6587
LTR7Y	1.60073	0	257	31	10.221	12.0623
LTR41C	1.58149	0	759	81	27.065	10.6719
AmnSINE1	1.5746	0	2614	220	73.862	8.41622
HERVE-int	1.49878	0	268	81	28.662	30.2239
MER41G	1.48476	0.002	114	13	4.645	11.4035
MER91B	1.4688	0	1442	110	39.741	7.62829
UCON35	1.45494	0.004	170	13	4.742	7.64706
MER91C	1.4127	0	1637	117	43.946	7.14722
LTR14C	1.39727	0	137	17	6.454	12.4088
MARE8	1.38223	0	218	16	6.138	7.33945
UCON101	1.33029	0.006	210	16	6.363	7.61905
Tigger3	1.23111	0	1147	111	47.285	9.67742
Tigger3c	1.23095	0	2327	184	78.391	7.90718
LTR77	1.2115	0.014	103	11	4.75	10.6796
LTR10E	1.20067	0	288	27	11.747	9.375
MamGypLTR3	1.17508	0	675	50	22.143	7.40741
LTR43B	1.16812	0.006	242	20	8.9	8.26446
MER65B	1.15478	0.026	198	15	6.737	7.57576
LTR57	1.14211	0.002	268	21	9.515	7.83582
LTR75	1.13659	0	291	24	10.916	8.24742
AmnSINE2	1.13066	0	667	41	18.725	6.14693
LTR72	1.12658	0.024	153	13	5.954	8.49673
MLT1K-int	1.10946	0.016	202	15	6.952	7.42574
LTR12E	1.10863	0.008	112	15	6.956	13.3929
LTR26E	1.10253	0.044	118	10	4.657	8.47458
LTR44	1.10069	0.02	218	17	7.927	7.79817
Chap1_Mam	1.06904	0	484	33	15.729	6.81818
X12_LINE	1.04578	0.03	221	13	6.297	5.88235
LTR45B	1.01484	0	444	34	16.826	7.65766
LTR7C	1.00757	0.008	320	26	12.932	8.125
HERV1_I-int	1.00684	0.048	49	11	5.474	22.449
LTR3A	0.999778	0.024	163	13	6.501	7.97546
MER101B	0.99636	0.02	261	19	9.524	7.27969
MER72B	0.99137	0.028	188	15	7.545	7.97872
REP522	0.990377	0	243	26	13.087	10.6996
LTR16D1	0.987169	0.034	207	15	7.567	7.24638
MER9a2	0.979099	0.004	310	27	13.697	8.70968
LTR34	0.936431	0.022	264	21	10.973	7.95455
LTR8B	0.92778	0	1611	138	72.542	8.56611
Eutr16	0.926059	0.002	520	34	17.894	6.53846
Tigger3b	0.921222	0	6279	551	290.962	8.77528
LTR25	0.904736	0.008	284	23	12.285	8.09859
MER101	0.889182	0.012	364	25	13.498	6.86813
LTR2C	0.88297	0.024	291	20	10.845	6.87285
MER61C	0.872067	0.008	312	22	12.02	7.05128
MER9a1	0.867947	0.004	341	27	14.794	7.91789
MER51A	0.85984	0	941	73	40.224	7.7577
MER81	0.859435	0	3668	184	101.415	5.01636
MER91A	0.852291	0	3627	188	104.134	5.18335
MER41B	0.847788	0	2851	206	114.461	7.22553
MLT1M	0.820237	0	2320	129	73.059	5.56034
MLT1F1	0.81695	0	3265	206	116.934	6.30934
LTR43	0.800008	0.016	424	26	14.933	6.13208
LTR86B1	0.799203	0.042	295	18	10.344	6.10169
5S	0.796581	0	1275	59	33.967	4.62745
LTR50	0.792518	0	2565	161	92.951	6.2768
LTR16A2	0.784501	0	1825	114	66.183	6.24658
MIR1_Amn	0.781715	0	11716	563	327.483	4.80539
MamRTE1	0.768595	0	8819	455	267.08	5.15932
MER96	0.75705	0	1274	61	36.094	4.78807
HERVP71A-int	0.754347	0.018	250	27	16.006	10.8
MER41C	0.742757	0	837	52	31.075	6.21266
HERVK3-int	0.740935	0.012	336	37	22.139	11.0119
LTR8	0.726128	0	3403	246	148.713	7.22892
EUTREP2	0.725845	0.004	819	42	25.395	5.12821
Charlie3	0.725624	0.016	337	34	20.561	10.089
ERV3-16A3_LTR	0.699332	0	1093	63	38.799	5.76395
Charlie17a	0.68966	0.002	1214	59	36.58	4.85997
MER54B	0.683095	0.032	438	29	18.062	6.621
LTR88b	0.659778	0.002	1636	82	51.904	5.01222
LFSINE_Vert	0.655815	0	2292	106	67.28	4.62478
MER57D	0.654909	0.046	452	26	16.513	5.75221
MER119	0.649013	0.008	1203	67	42.727	5.56941
MLT1J2	0.648353	0	6900	365	232.873	5.28986
MER74A	0.644178	0	1568	98	62.706	6.25
Tigger3a	0.643033	0	5323	304	194.671	5.71107
MamRep564	0.637534	0.006	788	37	23.784	4.69543
LTR26	0.615752	0.014	596	39	25.451	6.54362
HERVK-int	0.614902	0.008	251	39	25.466	15.5378
MER117	0.607663	0	4370	197	129.283	4.50801
MLT1H	0.607227	0	10078	551	361.708	5.46735
MLT1H2	0.601999	0	4721	238	156.804	5.0413
LTR23	0.5894	0.018	856	42	27.914	4.90654
MamSINE1	0.588498	0	5836	257	170.914	4.4037
CR1-3_Croc	0.57263	0.014	1338	59	39.671	4.40957
MamRep605b	0.570162	0	2374	109	73.416	4.59141
MER54A	0.550998	0.018	682	42	28.667	6.15836
L1PBa1	0.541318	0.006	441	56	38.48	12.6984
MLT1N2	0.531997	0	5722	263	181.89	4.5963
MLT1G	0.530274	0	2834	156	108.018	5.50459
MamGypLTR3a	0.508981	0.022	1326	64	44.974	4.82655
MLT1J1	0.49744	0	4928	229	162.215	4.64692
MIR3	0.484957	0	87870	3523	2517.25	4.00933
Plat_L3	0.484013	0	3315	143	102.243	4.31373
LTR32	0.482352	0.044	1216	63	45.096	5.18092
MLT1F	0.453733	0	4306	225	164.284	5.22527
X12_DNA	0.452749	0.02	1374	57	41.647	4.14847
LTR16D	0.451535	0.044	1115	53	38.757	4.75336
MER20B	0.445831	0	4146	192	140.959	4.63097
MER68	0.438236	0.008	1492	82	60.519	5.49598
LTR16A1	0.405466	0.002	2692	128	96.639	4.75483
GA-rich	0.401259	0	30288	1076	814.744	3.55256
MER77	0.396254	0.038	1299	70	53.188	5.38876
MLT2F	0.395197	0.014	1911	96	72.997	5.02355
LTR16E2	0.39369	0.002	2318	111	84.491	4.78861
L2b	0.355808	0	91943	3780	2953.81	4.11124
LTR67B	0.343973	0.004	3708	152	119.756	4.09924
MER20	0.343615	0	16757	670	528.003	3.99833
MamTip2b	0.329469	0	6730	252	200.549	3.74443
MLT1G3	0.326843	0.028	2737	129	102.849	4.71319
MIRc	0.303288	0	100994	3659	2965.27	3.62299
LTR16	0.300526	0.024	3017	137	111.238	4.54093
MER63A	0.28637	0.032	3511	134	109.875	3.81658
MLT1K	0.283982	0	17616	735	603.671	4.17234
LTR16C	0.27259	0	6620	286	236.76	4.32024
MLT1I	0.264398	0	11068	443	368.818	4.00253
MIRb	0.248414	0	223887	8070	6793.5	3.6045
L3b	0.231769	0.012	9560	334	284.431	3.49372
MER5B	0.20897	0	24966	829	717.213	3.32052
MLT1J	0.184425	0.004	15262	599	527.12	3.92478
MER5A	0.126387	0.006	34906	1108	1015.06	3.17424
L2c	0.0704312	0	126360	4342	4135.12	3.43621
