# Supplementary material for: Loss of epigenetic suppression of retrotransposons with oncogenic potential in aging mammary luminal epithelial cells
Source: HighWire-hosted journal article supplement (doi:10.1101/gr.277511.122), 2023-07-18
Supplement: Supplemental_Table_S5.xlsx [file Supplemental_Table_S5.xlsx]

## Sheet: Table S5A
Table S5A: Gene annotation for DMRs with methylation loss. Promoters are defined as TSS+/-2kb. DMRs that overlap a gene outside of its promoter are annotated as gene body.
chrom	chromStart	chromEnd	Annotation	Transcript ID	Gene Name
chr1	61921	61953	Promoter	OR4G11P	OR4G11P
chr1	833296	833615	Intergenic	NA	NA
chr1	1007086	1007468	GeneBody	NM_001205252.2	RNF223
chr1	1007474	1007877	GeneBody	NM_001205252.2	RNF223
chr1	1076382	1076766	GeneBody	NR_038869.1	LINC01342
chr1	1083980	1084389	Intergenic	NA	NA
chr1	1206252	1206497	GeneBody	NM_194458.2,NM_194315.2,NM_058167.3,NM_194457.2	UBE2J2
chr1	1226162	1226311	GeneBody	NM_001130413.4,NR_037668.3	SCNN1D
chr1	1292135	1292515	Promoter	NM_032348.4,NM_001282584.2,NM_001282585.1	MXRA8
chr1	1292535	1292923	Promoter	NM_032348.4,NM_001282584.2,NM_001282585.1	MXRA8
chr1	1293042	1293471	Promoter	NM_032348.4,NM_001282584.2,NM_001282585.1	MXRA8
chr1	1293568	1294005	Promoter	NM_032348.4,NM_001282584.2,NM_001282585.1	MXRA8
chr1	1294017	1294498	Promoter	NM_032348.4,NM_001282584.2,NM_001282585.1	MXRA8
chr1	1295337	1295628	Promoter	NM_001282583.2,NM_032348.4,NM_001282584.2,NM_001282585.1	MXRA8
chr1	1296286	1296740	Promoter	NM_001282583.2	MXRA8
chr1	1297740	1297896	Promoter	NM_001282583.2,NM_001282582.2	MXRA8
chr1	1361413	1361877	Promoter	NM_001146685.2	TMEM88B
chr1	1362046	1362384	Promoter	NM_001146685.2	TMEM88B
chr1	1823717	1823950	Promoter	NR_168263.1,NR_168264.1,NM_002074.5,NM_001282538.2,NM_001282539.2	LOC105378949,GNB1
chr1	1957046	1957384	GeneBody	NM_000815.5	GABRD
chr1	2016516	2016918	GeneBody	NM_001242874.3,NM_001350805.2,NM_001033581.3,NM_001350803.2,NM_001350806.2,NM_001350804.2,NM_002744.6,NR_146911.2	PRKCZ
chr1	2031701	2031773	GeneBody	NM_001242874.3,NM_001350805.2,NM_001033581.3,NM_001350803.2,NM_001350806.2,NM_001350804.2,NM_002744.6,NR_146911.2	PRKCZ
chr1	2084510	2084594	GeneBody	NM_001033582.3,NM_001242874.3,NM_001350805.2,NM_001033581.3,NM_001350803.2,NM_001350806.2,NM_001350804.2,NM_002744.6,NR_146911.2	PRKCZ
chr1	2121605	2122087	Promoter	NR_168005.1	LOC112268219
chr1	2145522	2145843	Promoter	NM_001282670.2	FAAP20
chr1	2234820	2235256	GeneBody	NM_003036.4	SKI
chr1	2254126	2254522	GeneBody	NM_024848.3	MORN1
chr1	2254530	2254906	GeneBody	NM_024848.3	MORN1
chr1	2266086	2266504	GeneBody	NM_024848.3	MORN1
chr1	2266551	2266980	GeneBody	NM_024848.3	MORN1
chr1	2300510	2300740	GeneBody	NM_001301060.2,NM_024848.3	MORN1
chr1	2362920	2363219	Intergenic	NA	NA
chr1	3382006	3382343	GeneBody	NM_014448.4	ARHGEF16
chr1	3432452	3432820	GeneBody	NM_001409.4	MEGF6
chr1	3470556	3470987	GeneBody	NM_001409.4	MEGF6
chr1	3471762	3472060	GeneBody	NM_001409.4	MEGF6
chr1	3472985	3473376	GeneBody	NM_001409.4	MEGF6
chr1	3501599	3501730	GeneBody	NM_001409.4	MEGF6
chr1	3501840	3502004	GeneBody	NM_001409.4	MEGF6
chr1	3514875	3515264	GeneBody	NM_001409.4	MEGF6
chr1	3775270	3775659	Promoter	NM_004402.4,NM_001320136.2,NM_001320132.2,NM_001282669.2,NR_135150.2,NR_135151.2,NR_135152.2,NR_104222.2,NM_014704.4	DFFB,CEP104
chr1	3808978	3809234	GeneBody	NM_207356.3	C1orf174
chr1	4109134	4109183	Intergenic	NA	NA
chr1	4520668	4521007	Intergenic	NA	NA
chr1	4733708	4733948	GeneBody	NM_001042478.2,NM_018836.4	AJAP1
chr1	4815795	4816014	GeneBody	NM_001042478.2,NM_018836.4	AJAP1
chr1	5338730	5338857	Intergenic	NA	NA
chr1	5449354	5449582	Intergenic	NA	NA
chr1	5537708	5537956	Intergenic	NA	NA
chr1	5569190	5569380	Intergenic	NA	NA
chr1	5968592	5968966	GeneBody	NM_015102.5,NM_001291593.2,NM_001291594.2,NR_111987.2	NPHP4
chr1	6333795	6334156	GeneBody	NM_181866.3,NM_181865.3,NM_181864.3,NM_007274.4	ACOT7
chr1	6445332	6445508	Promoter	NM_181864.3	ACOT7
chr1	6562453	6562773	GeneBody	NM_198681.4	PLEKHG5
chr1	6562809	6563094	GeneBody	NM_198681.4	PLEKHG5
chr1	6965742	6965902	GeneBody	NM_001349612.2,NM_001349608.2,NM_001349610.2,NM_001349609.2,NM_015215.4	CAMTA1
chr1	6978570	6978841	GeneBody	NM_001349612.2,NM_001349608.2,NM_001349610.2,NM_001349609.2,NM_015215.4	CAMTA1
chr1	6994602	6994973	GeneBody	NM_001349612.2,NM_001349608.2,NM_001349610.2,NM_001349609.2,NM_015215.4	CAMTA1
chr1	7179478	7179653	GeneBody	NM_001349612.2,NM_001349608.2,NM_001349610.2,NM_001349609.2,NM_015215.4	CAMTA1
chr1	7529898	7530128	GeneBody	NM_001349612.2,NM_001349608.2,NM_001349610.2,NM_001349609.2,NM_015215.4	CAMTA1
chr1	7532093	7532312	GeneBody	NM_001349612.2,NM_001349608.2,NM_001349610.2,NM_001349609.2,NM_015215.4	CAMTA1
chr1	7561322	7561530	GeneBody	NM_001349612.2,NM_001349608.2,NM_001349610.2,NM_001349609.2,NM_015215.4	CAMTA1
chr1	8971065	8971273	Intergenic	NA	NA
chr1	9260478	9260568	Intergenic	NA	NA
chr1	9310727	9310912	GeneBody	NM_001282587.2,NM_004285.4	H6PD
chr1	9494743	9494767	Intergenic	NA	NA
chr1	9762114	9762271	GeneBody	NM_001350235.1,NM_001350234.2,NM_005026.5	PIK3CD
chr1	9858412	9858700	GeneBody	NM_001302883.1,NM_014944.4,NM_001009566.3	CLSTN1
chr1	9948798	9949076	GeneBody	NM_020248.3,NM_001012329.2	CTNNBIP1
chr1	9949224	9949513	GeneBody	NM_020248.3,NM_001012329.2	CTNNBIP1
chr1	10124048	10124304	GeneBody	NM_006048.5,NM_001105562.3	UBE4B
chr1	10576475	10576621	GeneBody	NM_004565.3	PEX14
chr1	11033585	11033995	GeneBody	NM_001170754.1	C1orf127
chr1	11034367	11034630	GeneBody	NM_001170754.1	C1orf127
chr1	11141107	11141284	GeneBody	NM_001001998.3,NM_002685.4	EXOSC10
chr1	11194407	11194677	GeneBody	NM_001386500.1,NM_004958.4,NM_001386501.1	MTOR
chr1	11199297	11199447	GeneBody	NM_001386500.1,NM_004958.4,NM_001386501.1	MTOR
chr1	11199606	11199879	GeneBody	NM_001386500.1,NM_004958.4,NM_001386501.1	MTOR
chr1	11204729	11204909	Promoter	NR_046600.1	MTOR-AS1
chr1	11234673	11234805	GeneBody	NM_001386500.1,NM_004958.4,NM_001386501.1	MTOR
chr1	11306521	11306671	GeneBody	NM_001386500.1,NM_004958.4,NM_001386501.1	MTOR
chr1	11437376	11437531	Intergenic	NA	NA
chr1	11468114	11468226	Intergenic	NA	NA
chr1	11501290	11501501	Intergenic	NA	NA
chr1	11713755	11714217	Promoter	NM_183413.3,NM_001330355.2,NM_033182.7,NM_001304790.2,NM_001014765.2,NM_183412.3,NM_001304791.2,NR_130909.2,NM_012168.6	FBXO44,FBXO2
chr1	12238610	12238902	GeneBody	NM_001066.3	TNFRSF1B
chr1	12239027	12239265	GeneBody	NM_001066.3	TNFRSF1B
chr1	12599989	12600375	Intergenic	NA	NA
chr1	13867222	13867349	Intergenic	NA	NA
chr1	13867453	13867681	Intergenic	NA	NA
chr1	14915403	14915484	Intergenic	NA	NA
chr1	14952142	14952403	GeneBody	NM_015209.2,NM_001370230.1,NM_201628.3	KAZN
chr1	14952440	14952704	GeneBody	NM_015209.2,NM_001370230.1,NM_201628.3	KAZN
chr1	14988920	14988978	GeneBody	NM_015209.2,NM_001370230.1,NM_201628.3	KAZN
chr1	15130037	15130286	GeneBody	NM_015209.2,NM_001370230.1,NM_201628.3	KAZN
chr1	15207416	15207581	GeneBody	NM_015209.2,NM_001370230.1,NM_201628.3	KAZN
chr1	15234014	15234137	GeneBody	NM_015209.2,NM_001370230.1,NM_201628.3	KAZN
chr1	15256053	15256391	Promoter	NM_001018001.3,NM_001370231.1	KAZN
chr1	15297021	15297309	GeneBody	NM_001017999.3,NM_001018001.3,NM_001370231.1,NM_001018000.4,NM_001370229.1,NM_015209.2,NM_001370230.1,NM_201628.3	KAZN
chr1	15298199	15298612	GeneBody	NM_001017999.3,NM_001018001.3,NM_001370231.1,NM_001018000.4,NM_001370229.1,NM_015209.2,NM_001370230.1,NM_201628.3	KAZN
chr1	15709225	15709601	GeneBody	NM_052929.2,NM_001387888.1	FHAD1
chr1	15709677	15709978	GeneBody	NM_052929.2,NM_001387888.1	FHAD1
chr1	15712838	15713153	GeneBody	NM_052929.2,NM_001387888.1	FHAD1
chr1	15753577	15753975	GeneBody	NM_024329.6	EFHD2
chr1	16113347	16113586	Intergenic	NA	NA
chr1	16369639	16369922	Promoter	NM_000085.5	CLCNKB
chr1	16370197	16370264	Promoter	NM_000085.5	CLCNKB
chr1	16415587	16415725	Intergenic	NA	NA
chr1	16719344	16719534	GeneBody	NM_001271869.2,NM_001114600.3,NR_073500.2,NR_073503.2,NR_073502.2,NR_073501.2	SZRD1
chr1	17055608	17055677	Promoter	rna-TRG-CCC5-1	TRG-CCC5-1
chr1	17122834	17123212	Intergenic	NA	NA
chr1	17301467	17301570	GeneBody	NM_002403.4,NM_001135248.2,NM_017459.3,NM_001135247.2	MFAP2
chr1	17301719	17301946	GeneBody	NM_002403.4,NM_001135248.2,NM_017459.3,NM_001135247.2	MFAP2
chr1	17302060	17302333	GeneBody	NM_002403.4,NM_001135248.2,NM_017459.3,NM_001135247.2	MFAP2
chr1	17355029	17355270	GeneBody	NM_003000.3	SDHB
chr1	17374651	17374779	GeneBody	NM_003000.3	SDHB
chr1	17477030	17477103	Intergenic	NA	NA
chr1	17584702	17584866	GeneBody	NM_016233.2	PADI3
chr1	17585420	17585483	GeneBody	NM_016233.2	PADI3
chr1	17769950	17770075	Intergenic	NA	NA
chr1	17975368	17975656	GeneBody	NM_001328124.1,NM_001319838.1,NM_001319837.1,NM_001011722.2,NM_018125.4,NR_137288.2,NR_137287.2	ARHGEF10L
chr1	19005302	19005432	GeneBody	NM_013945.3,NM_002584.3,NM_001135254.2	PAX7
chr1	19110500	19110891	Intergenic	NA	NA
chr1	19203680	19203975	GeneBody	NM_001161504.2,NM_003748.4,NM_170726.3,NM_001319218.2	ALDH4A1
chr1	19203980	19204274	GeneBody	NM_001161504.2,NM_003748.4,NM_170726.3,NM_001319218.2	ALDH4A1
chr1	19250392	19250734	GeneBody	NM_001136265.2	IFFO2
chr1	19275366	19275492	GeneBody	NM_001136265.2	IFFO2
chr1	19277460	19277613	GeneBody	NM_001136265.2	IFFO2
chr1	19375572	19375770	Intergenic	NA	NA
chr1	19375891	19376023	Intergenic	NA	NA
chr1	19671798	19671912	GeneBody	NM_001282162.2,NM_001206541.3,NM_001206540.3,NM_004930.5	CAPZB
chr1	19680997	19681244	GeneBody	NM_001282162.2,NM_001206541.3,NM_001206540.3,NM_004930.5	CAPZB
chr1	19687600	19687785	GeneBody	NM_001282162.2,NM_001206541.3,NM_001206540.3,NM_004930.5	CAPZB
chr1	19715454	19715783	GeneBody	NM_001313932.2,NM_001282162.2,NM_001206541.3,NM_001206540.3,NM_004930.5	CAPZB
chr1	19756271	19756369	GeneBody	NM_001313932.2,NM_001282162.2,NM_001206541.3,NM_001206540.3,NM_004930.5	CAPZB
chr1	19764368	19764610	GeneBody	NM_001313932.2,NM_001282162.2,NM_001206541.3,NM_001206540.3,NM_004930.5	CAPZB
chr1	19764637	19764901	GeneBody	NM_001313932.2,NM_001282162.2,NM_001206541.3,NM_001206540.3,NM_004930.5	CAPZB
chr1	19765907	19766040	GeneBody	NM_001313932.2,NM_001282162.2,NM_001206541.3,NM_001206540.3,NM_004930.5	CAPZB
chr1	19766200	19766343	GeneBody	NM_001313932.2,NM_001282162.2,NM_001206541.3,NM_001206540.3,NM_004930.5	CAPZB
chr1	19766482	19766539	GeneBody	NM_001313932.2,NM_001282162.2,NM_001206541.3,NM_001206540.3,NM_004930.5	CAPZB
chr1	19778678	19778937	GeneBody	NM_001313932.2,NM_001282162.2,NM_001206541.3,NM_001206540.3,NM_004930.5	CAPZB
chr1	19779043	19779152	GeneBody	NM_001313932.2,NM_001282162.2,NM_001206541.3,NM_001206540.3,NM_004930.5	CAPZB
chr1	19978899	19979245	GeneBody	NM_001278166.2,NM_001204086.3,NM_001204085.2,NM_005380.8,NM_001204084.3,NM_001278165.2,NM_001278164.2,NM_182744.4,NM_001204089.2,NM_001204088.2	NBL1,MICOS10-NBL1
chr1	20052280	20052526	GeneBody	NM_001349114.3,NM_001349113.3,NM_181719.7,NM_001349112.3	TMCO4
chr1	20204436	20204559	Intergenic	NA	NA
chr1	20204661	20204840	Intergenic	NA	NA
chr1	20536094	20536146	Intergenic	NA	NA
chr1	20694357	20694620	GeneBody	NR_033887.1	LINC01141
chr1	21050370	21050726	GeneBody	NM_001103161.2,NM_001103160.2	SH2D5
chr1	21227081	21227286	GeneBody	NM_003760.4,NM_001198802.2,NM_001198801.2	EIF4G3
chr1	21637824	21637944	GeneBody	NM_001113348.2	ECE1
chr1	21643710	21644084	GeneBody	NM_001113348.2	ECE1
chr1	21649185	21649341	GeneBody	NM_001113348.2	ECE1
chr1	21652626	21652709	GeneBody	NM_001113348.2	ECE1
chr1	21676670	21676970	Intergenic	NA	NA
chr1	21822310	21822369	Intergenic	NA	NA
chr1	21910882	21911136	Intergenic	NA	NA
chr1	22239396	22239629	GeneBody	NM_001291860.2,NM_005529.7	HSPG2
chr1	22239869	22240009	GeneBody	NM_001291860.2,NM_005529.7	HSPG2
chr1	22240266	22240486	GeneBody	NM_001291860.2,NM_005529.7	HSPG2
chr1	22241452	22241543	GeneBody	NM_001291860.2,NM_005529.7	HSPG2
chr1	22241724	22242065	GeneBody	NM_001291860.2,NM_005529.7	HSPG2
chr1	22301231	22301488	Intergenic	NA	NA
chr1	22449048	22449390	GeneBody	NM_030761.5	WNT4
chr1	22460503	22460822	GeneBody	NM_030761.5	WNT4
chr1	22531050	22531298	Intergenic	NA	NA
chr1	22555192	22555281	Intergenic	NA	NA
chr1	22555403	22555544	Intergenic	NA	NA
chr1	22560443	22560706	Intergenic	NA	NA
chr1	22560737	22560971	Intergenic	NA	NA
chr1	22579393	22579704	Intergenic	NA	NA
chr1	22580061	22580168	Intergenic	NA	NA
chr1	22580272	22580631	Intergenic	NA	NA
chr1	22625548	22625972	Intergenic	NA	NA
chr1	22715663	22715937	Intergenic	NA	NA
chr1	22992481	22992498	Intergenic	NA	NA
chr1	23703116	23703510	Intergenic	NA	NA
chr1	23903636	23903794	Intergenic	NA	NA
chr1	24347403	24347671	Intergenic	NA	NA
chr1	24348265	24348376	Intergenic	NA	NA
chr1	24373152	24373259	Intergenic	NA	NA
chr1	24512852	24512915	Promoter	NM_170743.4,NM_173064.3,NM_173065.3	IFNLR1
chr1	24967978	24968434	Promoter	NM_001366596.1,NM_001366597.1,NM_001366598.1,NM_001303449.1,NM_001366592.1,NM_001366581.1,NM_001366576.1,NM_001366577.1,NM_001366589.1,NM_001366575.1,NM_001366588.1,NM_001303448.2,NM_001366582.1,NM_001366569.1,NM_005839.4,NM_001366595.1,NM_001366578.1,NM_001366599.1,NM_001366566.1,NM_001366600.1,NM_001366594.1,NM_001366586.1,NM_001366591.1,NM_001366570.1,NM_001366567.1,NM_001366590.1,NM_001366572…	SRRM1
chr1	25048963	25049183	Intergenic	NA	NA
chr1	25253705	25253906	GeneBody	NM_004350.3,NM_001031680.2,NM_001320672.1	RUNX3
chr1	25472271	25472502	Intergenic	NA	NA
chr1	25472536	25472788	Intergenic	NA	NA
chr1	25509537	25509944	Intergenic	NA	NA
chr1	25512370	25512594	Intergenic	NA	NA
chr1	25521089	25521391	Intergenic	NA	NA
chr1	25539395	25539661	Intergenic	NA	NA
chr1	25615224	25615376	GeneBody	NM_001127691.3,NM_001282869.2,NM_001282871.2,NM_001282867.1,NM_001282868.1,NM_001282870.1,NM_016124.4,NM_001282872.1,NM_001321772.2,NR_135789.2,NR_135787.2,NR_135788.2	RSRP1,RHD
chr1	25892950	25893219	GeneBody	NM_015627.3	LDLRAP1
chr1	26043016	26043100	GeneBody	NM_001385185.1,NM_001385184.1,NM_001289010.2,NM_020379.4,NM_001385183.1,NM_001385182.1	MAN1C1
chr1	26190020	26190294	GeneBody	NM_178422.6	PAQR7
chr1	26242067	26242364	Intergenic	NA	NA
chr1	26262325	26262515	Intergenic	NA	NA
chr1	26346570	26346707	Promoter	NM_004455.3	EXTL1
chr1	27425381	27425473	GeneBody	NM_003047.5,NR_046474.2	SLC9A1
chr1	27445355	27445530	GeneBody	NM_003047.5,NR_046474.2	SLC9A1
chr1	27833184	27833252	Intergenic	NA	NA
chr1	27845877	27846195	Intergenic	NA	NA
chr1	27846315	27846535	Intergenic	NA	NA
chr1	27847874	27848197	Intergenic	NA	NA
chr1	27849011	27849294	Intergenic	NA	NA
chr1	27921426	27921631	GeneBody	NM_001029882.3,NM_001371928.1	AHDC1
chr1	28195152	28195432	Intergenic	NA	NA
chr1	28200605	28200796	Promoter	NM_001039477.3,NM_001286115.2,NM_004848.4,NM_001286113.2,NM_001105556.3	THEMIS2
chr1	29776867	29777031	Intergenic	NA	NA
chr1	30677213	30677379	Intergenic	NA	NA
chr1	31331650	31331840	Intergenic	NA	NA
chr1	31370713	31370797	GeneBody	NM_014654.4	SDC3
chr1	32167739	32167897	Promoter	NM_001856.4	COL16A1
chr1	32170699	32170965	Promoter	NM_001856.4	COL16A1
chr1	32347170	32347487	Intergenic	NA	NA
chr1	33169456	33169557	Promoter	NM_030786.3,NM_001161708.2	SYNC
chr1	33617409	33617575	GeneBody	NM_001330483.2,NM_018207.3	TRIM62
chr1	33832445	33832526	GeneBody	NM_001385120.1,NM_001385122.1,NM_001385119.1,NM_001385112.1,NM_001385109.1,NM_198040.3,NM_001385121.1,NM_001330488.2,NM_001385123.1	PHC2
chr1	33832668	33832772	GeneBody	NM_001385120.1,NM_001385122.1,NM_001385119.1,NM_001385112.1,NM_001385109.1,NM_198040.3,NM_001385121.1,NM_001330488.2,NM_001385123.1	PHC2
chr1	33832920	33833009	GeneBody	NM_001385120.1,NM_001385122.1,NM_001385119.1,NM_001385112.1,NM_001385109.1,NM_198040.3,NM_001385121.1,NM_001330488.2,NM_001385123.1	PHC2
chr1	33980734	33981023	GeneBody	NM_001281956.2,NM_052896.5	CSMD2
chr1	34188640	34188777	GeneBody	NM_001281956.2,NM_052896.5	CSMD2
chr1	34437435	34437719	GeneBody	NM_001281956.2,NM_052896.5	CSMD2
chr1	35177671	35177835	Intergenic	NA	NA
chr1	35317087	35317413	GeneBody	NM_001164824.2,NM_001164825.2,NM_001320261.2,NM_138428.6	SMIM12
chr1	35601324	35601437	Intergenic	NA	NA
chr1	35601544	35601775	Intergenic	NA	NA
chr1	36043884	36044240	GeneBody	NM_178548.4	TFAP2E
chr1	36580484	36580834	GeneBody	NM_005202.4,NM_001294347.2	COL8A2
chr1	36594180	36594293	Intergenic	NA	NA
chr1	36599631	36599749	Intergenic	NA	NA
chr1	36626622	36626903	GeneBody	NM_001286365.2,NM_001286366.2,NM_018067.5	MAP7D1
chr1	36853362	36853472	Promoter	NM_032017.3,NM_001282546.2,NM_001282547.2	STK40
chr1	37049753	37050134	Intergenic	NA	NA
chr1	37050172	37050536	Intergenic	NA	NA
chr1	37175806	37175900	Intergenic	NA	NA
chr1	37334877	37334989	GeneBody	NM_000831.4	GRIK3
chr1	37454747	37454953	GeneBody	NM_000831.4	GRIK3
chr1	37455066	37455126	GeneBody	NM_000831.4	GRIK3
chr1	37477757	37477890	GeneBody	NM_000831.4	GRIK3
chr1	37921278	37921459	GeneBody	NR_038842.1	LINC01137
chr1	37937944	37938021	GeneBody	NR_038842.1	LINC01137
chr1	38138245	38138377	Intergenic	NA	NA
chr1	38189352	38189400	GeneBody	NM_001099439.2	EPHA10
chr1	38411855	38412049	Promoter	NM_001365820.1,NM_001365822.1,NM_005540.3,NM_001365824.1,NM_001365823.1,NM_001365821.1,NM_001365825.1,NR_158629.1,NR_158628.1,NR_158630.1	INPP5B
chr1	38412122	38412386	Promoter	NM_001365820.1,NM_001365822.1,NM_005540.3,NM_001365824.1,NM_001365823.1,NM_001365821.1,NM_001365825.1,NR_158629.1,NR_158628.1,NR_158630.1	INPP5B
chr1	38496522	38496828	Intergenic	NA	NA
chr1	38583488	38583563	GeneBody	NR_168386.1	MIR3659HG
chr1	39680955	39681195	GeneBody	NM_012090.5	MACF1
chr1	39873076	39873328	Promoter	NM_015038.2	KIAA0754
chr1	39873478	39873587	Promoter	NM_015038.2	KIAA0754
chr1	39975024	39975377	GeneBody	NM_181809.4	BMP8A
chr1	40507569	40507856	Promoter	NM_001350481.2,NM_001350485.2,NM_001105530.2,NM_001350483.2,NM_001350476.2,NM_001350475.2,NM_001330502.2,NM_006367.4,NM_001350482.2,NM_001350477.3,NM_001350484.2,NM_001350478.2,NM_001350480.2,NM_001350479.2	CAP1
chr1	41048913	41049121	Intergenic	NA	NA
chr1	41284015	41284418	GeneBody	NM_172163.3,NM_004700.4	KCNQ4
chr1	41284427	41284827	GeneBody	NM_172163.3,NM_004700.4	KCNQ4
chr1	41319231	41319394	Intergenic	NA	NA
chr1	41869013	41869063	Intergenic	NA	NA
chr1	42096777	42097208	GeneBody	NM_024503.5,NM_001127714.3	HIVEP3
chr1	42115653	42115701	GeneBody	NM_024503.5,NM_001127714.3	HIVEP3
chr1	42115828	42116099	GeneBody	NM_024503.5,NM_001127714.3	HIVEP3
chr1	42143774	42143968	GeneBody	NM_024503.5,NM_001127714.3	HIVEP3
chr1	42879569	42879705	Promoter	RPS15AP8	RPS15AP8
chr1	43208689	43208963	Intergenic	NA	NA
chr1	43230730	43230842	Promoter	NM_001243246.2,NM_001146289.2,NM_022356.4	P3H1
chr1	43868255	43868463	GeneBody	NM_015284.4,NM_001365999.1	SZT2
chr1	44031248	44031561	GeneBody	NM_001329140.2,NM_001329139.2,NM_130440.4,NM_002840.5,NM_001329137.2,NM_001329138.2	PTPRF
chr1	44031569	44031907	GeneBody	NM_001329140.2,NM_001329139.2,NM_130440.4,NM_002840.5,NM_001329137.2,NM_001329138.2	PTPRF
chr1	44967090	44967383	GeneBody	NM_001319957.2,NM_001376488.1,NM_001376487.1,NM_018150.4,NM_001376486.1,NM_001319956.1	RNF220
chr1	45111292	45111548	GeneBody	NM_001376489.1,NM_001319957.2,NM_001376488.1,NM_001376487.1,NM_018150.4,NM_001376486.1,NM_001319956.1	RNF220
chr1	46330456	46330631	Promoter	NM_001324321.2	MAST2
chr1	47279610	47279704	GeneBody	NM_001319163.2,NM_001319162.2,NM_001319161.2,NM_000779.4,NM_001099772.2,NR_135003.2	CYP4B1
chr1	48220042	48220118	Intergenic	NA	NA
chr1	48315375	48315459	GeneBody	NM_001194986.2	TRABD2B
chr1	48461466	48461558	Promoter	NM_001194986.2	TRABD2B
chr1	48484598	48484655	Intergenic	NA	NA
chr1	48539652	48539796	Intergenic	NA	NA
chr1	48979141	48979328	Intergenic	NA	NA
chr1	49083222	49083418	GeneBody	NM_001323574.2,NM_001323573.2,NM_032785.4,NM_001323575.2,NR_136623.2	AGBL4
chr1	49158969	49159218	GeneBody	NM_001323574.2,NM_001323573.2,NM_032785.4,NM_001323575.2,NR_136623.2	AGBL4
chr1	49938486	49938653	Promoter	NR_046839.1	AGBL4-IT1
chr1	53033828	53033900	Intergenic	NA	NA
chr1	53661072	53661345	Promoter	NM_001330589.2,NM_000098.3	CPT2
chr1	54007863	54008192	GeneBody	NM_147193.3,NM_001367484.1	GLIS1
chr1	54124658	54124734	GeneBody	NM_147193.3,NM_001367484.1	GLIS1
chr1	54740318	54740433	GeneBody	NM_145716.4,NM_018070.5,NM_001009955.4	SSBP3
chr1	54806712	54806892	GeneBody	NM_145716.4,NM_018070.5,NM_001009955.4	SSBP3
chr1	54839869	54840013	GeneBody	NM_145716.4,NM_018070.5,NM_001009955.4	SSBP3
chr1	54869006	54869221	GeneBody	NM_145716.4,NM_018070.5,NM_001009955.4	SSBP3
chr1	54869806	54869898	GeneBody	NM_145716.4,NM_018070.5,NM_001009955.4	SSBP3
chr1	54950490	54950546	Intergenic	NA	NA
chr1	55013996	55014290	Promoter	NM_147161.4,NM_015547.4	ACOT11
chr1	55271646	55272039	Promoter	NM_001110533.2,NM_152607.3	LEXM
chr1	55393787	55394048	Intergenic	NA	NA
chr1	59573330	59573699	Intergenic	NA	NA
chr1	59820171	59820362	GeneBody	NM_001244714.2,NM_001350799.2,NM_001350794.2,NM_001350790.2,NM_001350792.2,NM_001350791.2,NM_001350795.2,NM_001113411.2,NM_018291.5,NM_001350796.2,NM_001350798.2,NM_001350797.2,NM_001350793.2,NR_103473.2	FGGY
chr1	61471602	61471967	Intergenic	NA	NA
chr1	61519802	61520166	Intergenic	NA	NA
chr1	61668585	61668834	GeneBody	NM_005595.5,NM_001134673.4,NM_001145512.2,NM_001145511.2	NFIA
chr1	61668935	61669111	GeneBody	NM_005595.5,NM_001134673.4,NM_001145512.2,NM_001145511.2	NFIA
chr1	61907571	61907951	GeneBody	NM_005595.5,NM_001134673.4,NM_001145512.2,NM_001145511.2	NFIA
chr1	61914797	61915000	GeneBody	NM_005595.5,NM_001134673.4,NM_001145512.2,NM_001145511.2	NFIA
chr1	62005846	62005954	Intergenic	NA	NA
chr1	62006065	62006143	Intergenic	NA	NA
chr1	62054852	62054910	Intergenic	NA	NA
chr1	62084618	62084836	Intergenic	NA	NA
chr1	62698580	62699056	Intergenic	NA	NA
chr1	62824574	62824772	Intergenic	NA	NA
chr1	64270911	64270965	GeneBody	NM_001083592.2,NM_005012.4	ROR1
chr1	64993105	64993209	GeneBody	NM_001293274.2,NM_020925.4	CACHD1
chr1	65398896	65399305	GeneBody	NM_001321855.2,NM_002227.4,NM_001321857.2,NM_001320923.2,NM_001321856.2,NM_001321853.2,NM_001321854.2,NM_001321852.2	JAK1
chr1	65535050	65535067	Promoter	NM_001321853.2,NM_001321854.2,NM_001321852.2	JAK1
chr1	66999928	66999983	Promoter	NM_001376556.1,NM_001376557.1,NM_001376555.1,NM_001376552.1,NM_001376536.1,NM_001350218.2,NM_001376544.1,NM_001376543.1,NM_001376537.1,NM_001376548.1,NM_001376540.1,NM_032291.4,NM_001376546.1,NM_001376538.1,NM_001350217.2,NM_001376554.1,NM_001376551.1,NM_001308203.2,NM_001376545.1,NM_001376541.1,NM_001376550.1,NM_001376547.1,NM_001376539.1,NM_001376534.1,NM_001376542.1,NM_001376549.1,NM_001376535…	SGIP1
chr1	67561236	67561396	GeneBody	NM_001276352.2,NM_001276351.2,NR_075077.2	C1orf141
chr1	68108373	68108749	Intergenic	NA	NA
chr1	68219406	68219792	GeneBody	NM_018841.6	GNG12
chr1	68586401	68586423	GeneBody	NM_001002292.4,NR_040077.1	WLS,GNG12-AS1
chr1	68695623	68695763	GeneBody	NM_024911.7,NM_001193334.1,NM_001002292.4	WLS
chr1	68696112	68696270	GeneBody	NM_024911.7,NM_001193334.1,NM_001002292.4	WLS
chr1	68788954	68789134	Intergenic	NA	NA
chr1	68789395	68789601	Intergenic	NA	NA
chr1	71459912	71460178	GeneBody	NM_198719.2,NM_001126044.2,NM_198718.2,NM_198714.2,NM_198716.2,NM_198717.2,NR_028292.2,NR_028294.2,NR_028293.2	PTGER3
chr1	71690819	71690980	GeneBody	NR_046217.1	ZRANB2-AS2
chr1	71728864	71728954	Intergenic	NA	NA
chr1	71777433	71777614	Intergenic	NA	NA
chr1	72212399	72212453	GeneBody	NM_173808.3	NEGR1
chr1	73115260	73115500	Intergenic	NA	NA
chr1	74999674	74999847	GeneBody	NM_015978.3,NM_001112808.3	FPGT-TNNI3K,TNNI3K
chr1	76571439	76571662	GeneBody	NM_001349110.2,NM_001160011.3,NM_001349105.2,NM_001349108.2,NM_001349107.2,NM_152996.4,NM_001349111.2,NM_001349106.2,NM_001349109.3,NR_146056.2	ST6GALNAC3
chr1	76704042	76704203	GeneBody	NM_001349110.2,NM_001160011.3,NM_001349105.2,NM_001349108.2,NM_001349107.2,NM_152996.4,NM_001349111.2,NM_001349106.2,NM_001349109.3,NR_146056.2	ST6GALNAC3
chr1	76803020	76803073	GeneBody	NM_001349110.2,NM_001160011.3,NM_001349105.2,NM_001349108.2,NM_001349107.2,NM_152996.4,NM_001349111.2,NM_001349106.2,NM_001349109.3,NR_146056.2	ST6GALNAC3
chr1	77012478	77012633	GeneBody	NM_001349110.2,NM_001160011.3,NM_001349105.2,NM_001349108.2,NM_001349107.2,NM_152996.4,NM_001349111.2,NM_001349106.2,NM_001349109.3,NR_146056.2	ST6GALNAC3
chr1	77330232	77330402	Intergenic	NA	NA
chr1	77404869	77404961	GeneBody	NM_001320274.2,NM_001320273.2,NM_030965.3	ST6GALNAC5
chr1	77746372	77746570	Promoter	NM_174858.3	AK5
chr1	77861458	77861532	GeneBody	NM_012093.4,NM_174858.3	AK5
chr1	77864952	77865118	GeneBody	NM_012093.4,NM_174858.3	AK5
chr1	78150018	78150163	Promoter	NM_015534.6,NM_001376154.1,NM_001376155.1,NM_001376153.1,NM_001376146.1,NM_001376148.1,NM_001308237.2,NM_001376156.1,NM_001376147.1,NM_001376149.1,NM_001376151.1,NR_164776.1,NR_164777.1,NR_164775.1	ZZZ3
chr1	78353765	78354157	Promoter	NM_001172309.2,NM_144573.4,NR_103535.1	NEXN,NEXN-AS1
chr1	80108085	80108397	Intergenic	NA	NA
chr1	80253344	80253597	Intergenic	NA	NA
chr1	80913933	80914079	Intergenic	NA	NA
chr1	81971131	81971263	GeneBody	ARID3BP1,NM_001366008.1,NM_001366004.1,NM_001366003.1	ADGRL2,ARID3BP1
chr1	82538303	82538589	Intergenic	NA	NA
chr1	82651971	82652000	Intergenic	NA	NA
chr1	82863627	82863689	Intergenic	NA	NA
chr1	83164942	83165160	Intergenic	NA	NA
chr1	83262923	83263074	Intergenic	NA	NA
chr1	83526157	83526282	GeneBody	NR_147074.1	LINC01362
chr1	83638697	83638816	Intergenic	NA	NA
chr1	84102760	84102860	GeneBody	NR_119375.1	LINC01725
chr1	84474546	84474716	Intergenic	NA	NA
chr1	85462202	85462261	Promoter	NM_001330647.2,NM_153259.4	MCOLN2
chr1	86416970	86417122	GeneBody	NM_001349955.1,NM_152890.7,NR_146345.1,NR_146343.1,NR_146344.1,NR_146342.2,NR_146341.2,NR_146340.2	COL24A1
chr1	87103211	87103292	GeneBody	NR_024604.1,NR_135837.1	CLCA3P,CLCA4-AS1
chr1	87822536	87822660	GeneBody	NR_038324.1	LINC01364
chr1	89593673	89594006	Intergenic	NA	NA
chr1	89594015	89594345	Intergenic	NA	NA
chr1	89829864	89830028	Promoter	NM_001320257.2,NM_198460.3	GBP6
chr1	90032549	90032675	GeneBody	NM_001369817.2,NM_001369819.2,NM_001134476.2,NM_015350.4	LRRC8B
chr1	90074525	90074886	Intergenic	NA	NA
chr1	90075582	90075975	Intergenic	NA	NA
chr1	90097748	90097980	Promoter	NM_032270.5,NR_033981.1	LRRC8C-DT,LRRC8C
chr1	90302387	90302492	GeneBody	NM_018103.5,NM_001134479.2	LRRC8D
chr1	92011712	92012060	Intergenic	NA	NA
chr1	92057651	92057952	Intergenic	NA	NA
chr1	92109193	92109243	Promoter	HSP90B3P	HSP90B3P
chr1	92362792	92362888	GeneBody	NM_001195684.1	TGFBR3
chr1	92969628	92969715	Intergenic	NA	NA
chr1	94078671	94078765	Promoter	NM_001261410.2	BCAR3
chr1	94080369	94080656	Promoter	NM_001261410.2	BCAR3
chr1	94168254	94168447	GeneBody	NM_001261408.2	BCAR3
chr1	94187658	94187849	GeneBody	NM_001261408.2	BCAR3
chr1	94217374	94217498	GeneBody	NM_001261408.2	BCAR3
chr1	94234554	94234818	GeneBody	NR_148965.1,NM_001261408.2	MIG7,BCAR3
chr1	94555600	94555763	GeneBody	NM_000350.3	ABCA4
chr1	94596800	94596925	Intergenic	NA	NA
chr1	95064895	95065119	Intergenic	NA	NA
chr1	95307971	95308086	GeneBody	NM_001350223.1,NM_001301079.2,NM_152369.5,NM_001258343.2,NM_001258342.2,NM_001258341.2,NM_001258340.2,NM_001114106.3,NR_146575.2	SLC44A3
chr1	95698251	95698438	Promoter	NM_001199682.2,NM_015485.5,NM_001128142.2,NM_001278247.2,NM_001278248.2,NR_103483.2,NR_103484.1,NR_125948.1,NR_125949.1	LOC101928118,RWDD3
chr1	95698800	95699240	Promoter	NM_001199682.2,NM_015485.5,NM_001128142.2,NM_001278247.2,NM_001278248.2,NR_103483.2,NR_103484.1,NR_125948.1,NR_125949.1	LOC101928118,RWDD3
chr1	95775157	95775348	Intergenic	NA	NA
chr1	95975659	95975946	Promoter	NR_110622.1,NR_110621.1	LINC02607
chr1	95976260	95976339	Promoter	NR_110622.1,NR_110621.1	LINC02607
chr1	96772648	96772756	GeneBody	NR_110693.1	LINC01787
chr1	96939821	96940033	Intergenic	NA	NA
chr1	97418029	97418098	Intergenic	NA	NA
chr1	99129076	99129160	Promoter	NM_152238.4,NM_015976.5,NM_001364903.1,NR_033716.2	SNX7
chr1	101092962	101093108	GeneBody	NR_038914.1	LINC01349
chr1	104584042	104584166	Intergenic	NA	NA
chr1	105569052	105569210	Intergenic	NA	NA
chr1	108534077	108534222	GeneBody	NR_046653.1	VAV3-AS1
chr1	109842731	109842853	GeneBody	NM_001010985.3,NM_001265613.2	MYBPHL
chr1	109921975	109922107	GeneBody	NM_001205228.2,NM_002959.7	SORT1
chr1	110471740	110471850	GeneBody	NM_172211.4,NM_000757.6	CSF1
chr1	110591551	110591776	GeneBody	NM_033088.4,NM_001270768.2,NR_073071.2	STRIP1
chr1	111889709	111889881	Promoter	NM_181643.6,NM_001300831.1,NR_125338.1	PIFO
chr1	112078650	112078808	GeneBody	NM_001081976.3,NM_001302680.2	TMIGD3
chr1	112491856	112491980	GeneBody	NM_004980.5,NM_172198.3,NM_001378969.1,NM_001378970.1	KCND3
chr1	113170356	113170710	Promoter	MRPL53P1	MRPL53P1
chr1	113918672	113918841	Intergenic	NA	NA
chr1	115217463	115217520	GeneBody	NM_000036.3,NM_001172626.1	AMPD1
chr1	115834539	115834747	GeneBody	NM_002506.3,NR_157569.1	NGF-AS1,NGF
chr1	115862525	115862620	GeneBody	NM_002506.3,NR_157569.1	NGF-AS1,NGF
chr1	115999076	115999326	Intergenic	NA	NA
chr1	116081765	116081922	Intergenic	NA	NA
chr1	117280298	117280343	Intergenic	NA	NA
chr1	117342182	117342438	Intergenic	NA	NA
chr1	117418136	117418332	Intergenic	NA	NA
chr1	117434333	117434505	Intergenic	NA	NA
chr1	118129545	118129674	Intergenic	NA	NA
chr1	118136976	118137107	Intergenic	NA	NA
chr1	118137551	118137818	Intergenic	NA	NA
chr1	120065916	120066121	Intergenic	NA	NA
chr1	120189503	120189574	Promoter	NM_001080470.2	ZNF697
chr1	146158644	146158850	GeneBody	NR_104217.1_2	NBPF25P
chr1	146738230	146738247	GeneBody	NM_001348452.2_2,NM_001256338.3_2,NM_001348454.2_2,NM_001348456.2_2,NM_001256337.3_2,NM_001348466.2_2,NM_001348463.2_2,NM_001348459.2_2,NM_001348464.2_2,NM_001348461.2_2,NM_001348457.2_2,NM_001348453.2_2,NM_001256336.3_2,NM_024568.4_2,NM_001348455.2_2,NM_001348458.2_2,NM_001348465.2_2,NM_001348460.2_2,NM_001348462.2_2,NM_004284.6_2,NR_145687.2_2,NR_145690.2_2,NR_145688.2_2,NR_145695.2_2,NR_145684…	CHD1L
chr1	147230968	147231339	Promoter	NM_181703.4_2	GJA5
chr1	147794946	147795081	Intergenic	NA	NA
chr1	149863208	149863240	Intergenic	NA	NA
chr1	149907822	149908098	Promoter	NM_181873.3_2,NM_001145862.2_2	MTMR11
chr1	150128325	150128424	GeneBody	NM_001304723.2_2,NM_016274.6_2,NM_001304724.2_2,NM_001304722.2_2	PLEKHO1
chr1	150134842	150134981	Promoter	NR_135098.1_2	LOC105371433
chr1	150447461	150447631	GeneBody	NM_001387114.1_2,NM_001387118.1_2,NM_001387115.1_2,NM_001297673.2_2,NM_001297674.2_2,NM_001387117.1_2,NM_001387119.1_2,NM_001387116.1_2,NM_001387120.1_2,NM_015203.5_2,NM_001387121.1_2,NM_001387122.1_2,NM_001387123.1_2,NM_001387124.1_2	RPRD2
chr1	151810585	151810943	Promoter	NR_152846.1,NR_024237.2	C2CD4D-AS1
chr1	153456838	153457180	Intergenic	NA	NA
chr1	153659737	153659821	GeneBody	NM_000906.4	NPR1
chr1	153750266	153750410	GeneBody	NM_001317929.4_2,NM_024330.4_2,NR_145826.3_2	SLC27A3
chr1	153763234	153763333	Intergenic	NA	NA
chr1	154363532	154363811	Intergenic	NA	NA
chr1	154876243	154876277	Intergenic	NA	NA
chr1	154876428	154876535	Intergenic	NA	NA
chr1	154942358	154942650	Promoter	NM_001130040.2,NM_183001.5	SHC1
chr1	154942719	154942961	Promoter	NM_001130040.2,NM_183001.5	SHC1
chr1	154943650	154943779	Promoter	NM_001130040.2,NM_183001.5	SHC1
chr1	155188903	155189052	GeneBody	NR_002188.3_2	GBAP1
chr1	155322471	155322609	GeneBody	NM_001366177.2,NM_018489.3	ASH1L
chr1	156130725	156131150	GeneBody	NM_001370567.1,NM_001193302.2,NM_022367.4,NM_001193301.2,NM_001370568.1,NM_001370569.1,NM_001193300.2,NM_001370571.1	SEMA4A
chr1	156211308	156211608	Promoter	NM_199173.6	BGLAP
chr1	156382511	156382642	GeneBody	NR_135266.3,NR_135268.3,NR_168073.1,NR_168072.1,NR_135267.3,NR_135265.3,NR_168070.1,NR_168071.1,NR_135261.1,NR_135264.1,NR_135263.1,NR_135260.1,NR_135262.1	MIR9-1HG
chr1	156478448	156478533	Intergenic	NA	NA
chr1	156628346	156628483	GeneBody	NM_021948.5	BCAN
chr1	156818192	156818396	GeneBody	NM_014215.3,NM_001007792.1	INSRR,NTRK1
chr1	156873487	156873763	GeneBody	NM_001080471.3,NM_001353682.2,NM_001353683.2	PEAR1
chr1	156977354	156977425	GeneBody	NM_198236.3,NM_001377419.1,NM_014784.4,NM_001377418.1	ARHGEF11
chr1	157127517	157127732	Intergenic	NA	NA
chr1	157368743	157368955	Intergenic	NA	NA
chr1	157964631	157964752	Promoter	NM_001286349.2,NM_018240.7	KIRREL1
chr1	157964935	157965029	Promoter	NM_001286349.2,NM_018240.7	KIRREL1
chr1	157984528	157984688	GeneBody	NM_001286349.2,NM_018240.7	KIRREL1
chr1	158044938	158045221	GeneBody	NM_001286349.2,NM_018240.7	KIRREL1
chr1	159074918	159075162	Intergenic	NA	NA
chr1	159675091	159675202	Promoter	CRPP1	CRPP1
chr1	159899093	159899484	GeneBody	NM_001135050.2,NM_020789.4	IGSF9
chr1	161501291	161501325	Promoter	rna-TRG-TCC2-6,rna-TRL-CAG1-6	TRL-CAG1-6,TRG-TCC2-6
chr1	161501474	161501673	Promoter	rna-TRG-TCC2-6,rna-TRL-CAG1-6	TRL-CAG1-6,TRG-TCC2-6
chr1	161771685	161771847	GeneBody	NM_007348.4	ATF6
chr1	161932158	161932211	GeneBody	NM_007348.4	ATF6
chr1	161956515	161956626	GeneBody	NM_001347700.2,NM_001297713.2,NM_015441.3	OLFML2B
chr1	162029948	162030073	Intergenic	NA	NA
chr1	162164088	162164260	GeneBody	NM_001164757.2,NM_014697.3	NOS1AP
chr1	162276297	162276500	GeneBody	NM_001164757.2,NM_014697.3	NOS1AP
chr1	162289728	162289837	GeneBody	NM_001164757.2,NM_014697.3	NOS1AP
chr1	162289940	162290009	GeneBody	NM_001164757.2,NM_014697.3	NOS1AP
chr1	162305360	162305569	GeneBody	NM_001164757.2,NM_014697.3	NOS1AP
chr1	162357349	162357638	Intergenic	NA	NA
chr1	162515267	162515506	Intergenic	NA	NA
chr1	163251829	163251835	GeneBody	NM_001254748.2	RGS5
chr1	164591362	164591551	GeneBody	NM_001353130.1,NM_001204963.2,NM_001204961.2,NM_002585.4,NM_001353131.2	PBX1
chr1	164723155	164723406	GeneBody	NM_001353130.1,NM_001204963.2,NM_001204961.2,NM_002585.4,NM_001353131.2	PBX1
chr1	164723543	164723753	GeneBody	NM_001353130.1,NM_001204963.2,NM_001204961.2,NM_002585.4,NM_001353131.2	PBX1
chr1	165352773	165352838	Intergenic	NA	NA
chr1	166050277	166050543	GeneBody	NM_001017961.5,NM_001320302.2,NR_163271.1,NR_135199.2	FAM78B
chr1	167430238	167430442	GeneBody	NM_001378515.1,NM_001378516.1,NM_198053.3,NM_000734.4	CD247
chr1	167653143	167653309	GeneBody	NM_001322924.2,NM_001322923.2,NM_052862.4	RCSD1
chr1	168061447	168061658	GeneBody	NM_001267613.1,NM_001267612.2,NM_001375885.1,NM_153832.3,NM_001375884.1,NM_001381909.1,NM_001375883.1,NM_001267610.2,NM_001349634.1,NM_001267611.1,NM_001267614.1,NM_001349632.1,NM_001267609.1,NM_001349633.1,NM_001349635.1	GPR161
chr1	168068630	168068725	GeneBody	NM_001267613.1,NM_001267612.2,NM_001375885.1,NM_153832.3,NM_001375884.1,NM_001381909.1,NM_001375883.1,NM_001267610.2,NM_001349634.1,NM_001267611.1,NM_001267614.1,NM_001349632.1,NM_001267609.1,NM_001349633.1,NM_001349635.1	GPR161
chr1	168084162	168084311	GeneBody	NM_001267613.1,NM_001267612.2,NM_001375885.1,NM_153832.3,NM_001375884.1,NM_001381909.1,NM_001375883.1,NM_001267610.2,NM_001349634.1,NM_001267611.1,NM_001267614.1,NM_001349632.1,NM_001267609.1,NM_001349633.1,NM_001349635.1	GPR161
chr1	168579145	168579278	Intergenic	NA	NA
chr1	168678878	168678967	GeneBody	NM_001937.5	DPT
chr1	170182913	170183017	GeneBody	NR_146891.1	LINC01681
chr1	170183287	170183538	GeneBody	NR_146891.1	LINC01681
chr1	171632633	171632771	Intergenic	NA	NA
chr1	172688230	172688367	Intergenic	NA	NA
chr1	173174835	173174950	Promoter	NM_001297562.2,NM_003326.5	TNFSF4
chr1	176525175	176525275	GeneBody	NM_021936.3,NM_020318.3	PAPPA2
chr1	179052549	179052651	Promoter	NM_022371.4	TOR3A
chr1	180491445	180491581	Intergenic	NA	NA
chr1	180496320	180496472	Intergenic	NA	NA
chr1	180505842	180506014	Intergenic	NA	NA
chr1	180535275	180535450	GeneBody	NR_125716.1	OVAAL
chr1	180554050	180554314	Intergenic	NA	NA
chr1	180554357	180554586	Intergenic	NA	NA
chr1	180882411	180882864	Promoter	NM_020950.2	KIAA1614
chr1	181069036	181069321	Intergenic	NA	NA
chr1	181105438	181105604	Intergenic	NA	NA
chr1	182030168	182030276	Promoter	NM_001009992.1	ZNF648
chr1	182030624	182030836	Promoter	NM_001009992.1	ZNF648
chr1	182650654	182650909	GeneBody	NM_001102450.3,NM_033345.4,NM_001387847.1	RGS8
chr1	182664346	182664489	GeneBody	NM_001387847.1	RGS8
chr1	183013561	183013624	GeneBody	NM_002293.4	LAMC1
chr1	183107604	183107666	GeneBody	NR_149048.1,NM_002293.4	LAMC1,LAMC1-AS1
chr1	183261043	183261173	GeneBody	NM_170706.4,NM_015039.4	NMNAT2
chr1	183261288	183261467	GeneBody	NM_170706.4,NM_015039.4	NMNAT2
chr1	183680912	183681034	Promoter	LOC100420254	LOC100420254
chr1	184368564	184368837	GeneBody	NM_030806.4	C1orf21
chr1	184488936	184488998	GeneBody	NM_030806.4	C1orf21
chr1	184510916	184511192	GeneBody	NM_030806.4	C1orf21
chr1	184860226	184860398	GeneBody	NM_052966.4	NIBAN1
chr1	185261653	185261686	Intergenic	NA	NA
chr1	186648218	186648344	Promoter	NR_125801.1,NM_000963.4	PTGS2,PACERR
chr1	190512310	190512387	Intergenic	NA	NA
chr1	191577785	191578271	Intergenic	NA	NA
chr1	192513857	192513919	Intergenic	NA	NA
chr1	197320345	197320445	GeneBody	NM_001193640.2,NM_001257966.2,NM_201253.3,NM_001257965.2,NR_047563.2,NR_047564.2	CRB1
chr1	200680150	200680238	Intergenic	NA	NA
chr1	200749971	200750119	GeneBody	NM_001297708.2,NM_203459.3,NM_001297707.2	CAMSAP2
chr1	200990407	200990573	GeneBody	NM_001252100.2,NM_001252102.2,NM_017596.4,NM_001252103.2	KIF21B
chr1	201257993	201258307	GeneBody	NM_001005337.3,NM_000299.4	PKP1
chr1	201438672	201439135	Promoter	NM_012396.5,NR_073080.2	PHLDA3
chr1	201473800	201474054	GeneBody	NM_001193571.2,NM_004078.3,NM_001193570.2	CSRP1
chr1	201872227	201872370	GeneBody	NM_012134.3	LMOD1
chr1	201873906	201874132	GeneBody	NM_012134.3	LMOD1
chr1	201915009	201915112	Promoter	NM_012134.3	LMOD1
chr1	201992765	201992825	Intergenic	NA	NA
chr1	202255885	202255962	GeneBody	NM_001017404.2,NM_021636.3,NM_001017403.2	LGR6
chr1	202803870	202804116	Intergenic	NA	NA
chr1	203243829	203244162	Intergenic	NA	NA
chr1	203276162	203276608	Promoter	NM_006763.3,NR_034151.1,NR_034150.1	LINC01136,BTG2
chr1	203320137	203320540	Promoter	NM_002023.5,NR_103757.2	FMOD
chr1	203320650	203320731	Promoter	NM_002023.5,NR_103757.2	FMOD
chr1	203432987	203433192	Intergenic	NA	NA
chr1	203524485	203524732	Intergenic	NA	NA
chr1	204011128	204011195	Promoter	NR_027902.1	LINC00303
chr1	204121652	204122073	Promoter	NM_001297760.2,NM_018208.4,NM_001297762.2,NM_001297761.2	ETNK2
chr1	204161079	204161165	GeneBody	NM_002256.4	KISS1
chr1	204588286	204588656	GeneBody	NM_006338.3,NM_201630.2	LRRN2
chr1	204596328	204596537	GeneBody	NM_006338.3,NM_201630.2	LRRN2
chr1	204596756	204596840	GeneBody	NM_006338.3,NM_201630.2	LRRN2
chr1	204606767	204606978	GeneBody	NM_006338.3,NM_201630.2	LRRN2
chr1	204607092	204607443	GeneBody	NM_006338.3,NM_201630.2	LRRN2
chr1	204653185	204653241	Promoter	NM_006338.3,NM_201630.2	LRRN2
chr1	204673452	204673552	Intergenic	NA	NA
chr1	204733509	204733703	Intergenic	NA	NA
chr1	204938930	204939180	GeneBody	NM_001378331.1,NM_001160331.2,NM_001160333.2,NM_001378330.1,NM_001005389.2,NM_001365986.1,NM_015090.4,NM_001160332.2,NM_001005388.3,NM_001378329.1,NR_165492.1	NFASC
chr1	204958915	204959274	GeneBody	NM_001160331.2,NM_001365986.1,NM_015090.4,NM_001160332.2,NM_001005388.3,NM_001378329.1	NFASC
chr1	204989883	204990106	GeneBody	NM_001160331.2,NM_001365986.1,NM_015090.4,NM_001160332.2,NM_001005388.3,NM_001378329.1	NFASC
chr1	205220952	205221033	GeneBody	NM_001297611.2,NM_001375651.1,NM_001375652.1,NM_001242925.2,NM_014858.4	TMCC2
chr1	205254860	205255241	Intergenic	NA	NA
chr1	205269663	205269977	Intergenic	NA	NA
chr1	205325680	205325906	Promoter	NM_018203.3,NM_001271863.2,NM_001271865.2,NM_001271864.2	KLHDC8A
chr1	205325950	205326200	Promoter	NM_018203.3,NM_001271863.2,NM_001271865.2,NM_001271864.2	KLHDC8A
chr1	205411602	205411700	GeneBody	NR_103783.1	BLACAT1
chr1	205470101	205470248	Intergenic	NA	NA
chr1	206264795	206265064	GeneBody	NM_001007544.4_2	RHEX
chr1	206710613	206710714	GeneBody	NM_182664.4_2,NM_182663.4_2	RASSF5
chr1	207494069	207494232	Promoter	NM_001300902.2,NM_000574.5,NM_001300904.2,NM_001300903.2,NM_001114752.3,NR_125349.2	CD55
chr1	208040672	208040925	Intergenic	NA	NA
chr1	208066291	208066439	GeneBody	NM_001773.3,NM_001025109.2	CD34
chr1	208242677	208242781	GeneBody	NM_025179.4	PLXNA2
chr1	208255095	208255326	GeneBody	NM_025179.4	PLXNA2
chr1	209537468	209537604	Intergenic	NA	NA
chr1	209570900	209571102	Intergenic	NA	NA
chr1	209971604	209971753	GeneBody	NM_006147.4,NM_001206696.2	IRF6
chr1	210022848	210022980	GeneBody	NM_014388.7	UTP25
chr1	210036310	210036544	Intergenic	NA	NA
chr1	210744882	210745041	GeneBody	NM_001170580.3,NM_001170587.3,NM_001170588.3,NM_018194.6,NM_001170564.3,NM_001122834.4	HHAT
chr1	211803510	211803740	Intergenic	NA	NA
chr1	212648595	212648686	Intergenic	NA	NA
chr1	213476914	213477003	Intergenic	NA	NA
chr1	213571169	213571265	Intergenic	NA	NA
chr1	213589117	213589536	Intergenic	NA	NA
chr1	213593303	213593557	Intergenic	NA	NA
chr1	213795773	213796061	Intergenic	NA	NA
chr1	213796146	213796464	Intergenic	NA	NA
chr1	214319986	214320223	Intergenic	NA	NA
chr1	214455887	214456358	Promoter	NM_020197.3	SMYD2
chr1	216351241	216351452	GeneBody	NM_007123.6,NM_206933.4	USH2A
chr1	216604751	216605083	Intergenic	NA	NA
chr1	216660853	216660912	Intergenic	NA	NA
chr1	216813863	216813947	GeneBody	NM_001243519.2,NM_001243515.2,NM_001243518.2,NM_001438.4,NM_001243514.2,NM_001243509.2,NM_001243507.2,NM_001350125.2,NM_001350123.2,NM_206594.3,NM_206595.3,NM_001243506.2,NM_001243505.2,NM_001350122.2,NM_001134285.3,NM_001350124.2,NM_001243510.3,NM_001243511.3,NM_001243512.1,NM_001243513.1	ESRRG
chr1	217264533	217264833	Promoter	NM_001350123.2,NM_206594.3,NM_206595.3,NM_001243506.2,NM_001243505.2,NM_001350122.2	ESRRG
chr1	217418103	217418160	Intergenic	NA	NA
chr1	218142742	218142923	Intergenic	NA	NA
chr1	218143040	218143210	Intergenic	NA	NA
chr1	219650919	219651132	GeneBody	NR_135822.1	LYPLAL1-AS1
chr1	219983961	219984064	Intergenic	NA	NA
chr1	220703217	220703352	Promoter	NM_001286129.2,NM_001286128.2,NM_001286126.2,NM_018650.5,NM_001286124.2	MARK1
chr1	221203603	221203815	Intergenic	NA	NA
chr1	221961692	221962096	Intergenic	NA	NA
chr1	222387945	222388166	Intergenic	NA	NA
chr1	223253094	223253302	Intergenic	NA	NA
chr1	223296833	223297055	GeneBody	NM_003268.6	TLR5
chr1	223718619	223718668	GeneBody	NM_001143962.2	CAPN8
chr1	224425932	224426170	GeneBody	NM_002533.4,NM_001243147.2,NM_206840.3,NM_001243146.2	NVL
chr1	224455028	224455245	GeneBody	NM_002533.4,NM_001243147.2,NM_206840.3,NM_001243146.2	NVL
chr1	224896203	224896302	GeneBody	NM_001322305.2,NM_152495.2,NM_001322303.2,NM_001322304.2,NM_001322302.2,NR_136287.2,NR_136297.2,NR_136295.2,NR_136292.2,NR_136296.2,NR_136294.2,NR_136291.2,NR_136293.2,NR_136288.1,NR_136290.1,NR_136289.1	CNIH3
chr1	224914646	224914838	GeneBody	NM_001322305.2,NM_152495.2,NM_001322303.2,NM_001322304.2,NM_001322302.2,NR_136287.2,NR_136297.2,NR_136295.2,NR_136292.2,NR_136296.2,NR_136294.2,NR_136291.2,NR_136293.2,NR_136288.1,NR_136290.1,NR_136289.1	CNIH3
chr1	225865376	225865736	Intergenic	NA	NA
chr1	225923641	225923690	Intergenic	NA	NA
chr1	226607052	226607217	Intergenic	NA	NA
chr1	226658648	226658887	Intergenic	NA	NA
chr1	226679352	226679693	Promoter	CDKN2AIPNLP1	CDKN2AIPNLP1
chr1	227023183	227023285	Intergenic	NA	NA
chr1	228103700	228104059	Intergenic	NA	NA
chr1	228367895	228367981	GeneBody	NM_001310327.2,NM_001010867.4	IBA57
chr1	228722721	228722915	Intergenic	NA	NA
chr1	228760893	228761216	Promoter	NR_023370.1,NR_023369.1	RNA5S7,RNA5S8
chr1	229282372	229282487	Intergenic	NA	NA
chr1	229518052	229518134	Promoter	RNU6-180P	RNU6-180P
chr1	230428511	230428754	Intergenic	NA	NA
chr1	230457606	230457741	GeneBody	NM_001258311.2	PGBD5
chr1	230484426	230484729	GeneBody	NM_001258311.2	PGBD5
chr1	230493057	230493495	GeneBody	NM_001258311.2	PGBD5
chr1	230533861	230534112	GeneBody	NM_001258311.2	PGBD5
chr1	230535397	230535683	GeneBody	NM_001258311.2	PGBD5
chr1	230559818	230559908	GeneBody	NM_001258311.2	PGBD5
chr1	230885143	230885205	GeneBody	NM_001319676.2,NM_016452.3,NM_006615.3	CAPN9
chr1	230963726	230963821	Intergenic	NA	NA
chr1	231019577	231019713	Intergenic	NA	NA
chr1	231475829	231476068	Promoter	NM_001261462.3,NM_032018.7,NM_001010984.4	SPRTN
chr1	231766348	231766572	GeneBody	NM_001164554.2,NM_001012958.2,NM_001164553.2,NM_001164550.2,NM_001164552.2,NM_001164555.2,NM_001164551.2,NM_001164549.2,NM_001164556.2,NM_001164548.2,NM_001164545.2,NM_001164544.2,NM_001164539.2,NM_001012959.2,NM_001164546.2,NM_001164542.2,NM_001164547.2,NM_001164541.2,NM_001164538.2,NM_001164540.2,NM_001012957.2,NM_018662.3,NM_001164537.2,NR_028399.1,NR_028400.1,NR_028398.1,NR_028396.1,NR_028397…	DISC1,TSNAX-DISC1
chr1	231969318	231969462	GeneBody	NM_001164539.2,NM_001012959.2,NM_001164546.2,NM_001164542.2,NM_001164547.2,NM_001164541.2,NM_001164538.2,NM_001164540.2,NM_001012957.2,NM_018662.3,NM_001164537.2,NR_028393.1	DISC1,TSNAX-DISC1
chr1	232052992	232053160	GeneBody	NM_001164546.2,NM_001164542.2,NM_001164547.2,NM_001164541.2,NM_001164538.2,NM_001164540.2,NM_001012957.2,NM_018662.3,NM_001164537.2,NR_028393.1	DISC1,TSNAX-DISC1
chr1	232059304	232059543	GeneBody	NM_001164546.2,NM_001164542.2,NM_001164547.2,NM_001164541.2,NM_001164538.2,NM_001164540.2,NM_001012957.2,NM_018662.3,NM_001164537.2,NR_028393.1	DISC1,TSNAX-DISC1
chr1	232065181	232065293	GeneBody	NR_126441.1,NM_001164546.2,NM_001164542.2,NM_001164547.2,NM_001164541.2,NM_001164538.2,NM_001164540.2,NM_001012957.2,NM_018662.3,NM_001164537.2,NR_028393.1	DISC1,TSNAX-DISC1,DISC1-IT1
chr1	232367450	232367747	Intergenic	NA	NA
chr1	232368076	232368465	Intergenic	NA	NA
chr1	232368629	232368777	Intergenic	NA	NA
chr1	232521003	232521390	Intergenic	NA	NA
chr1	232551560	232551908	GeneBody	NM_020808.5,NM_001377488.1	SIPA1L2
chr1	233616037	233616274	Intergenic	NA	NA
chr1	234703366	234703422	Intergenic	NA	NA
chr1	234717581	234717673	Intergenic	NA	NA
chr1	234724842	234725106	Intergenic	NA	NA
chr1	234753035	234753400	Intergenic	NA	NA
chr1	234754563	234754699	Intergenic	NA	NA
chr1	234822482	234822544	Intergenic	NA	NA
chr1	234921357	234921473	Intergenic	NA	NA
chr1	235003376	235003489	Intergenic	NA	NA
chr1	235022997	235023059	Intergenic	NA	NA
chr1	235998713	235998772	GeneBody	NR_102436.3,NM_000081.4,NM_001301365.1	LYST
chr1	236096186	236096266	Intergenic	NA	NA
chr1	236105691	236105869	Intergenic	NA	NA
chr1	236202912	236203134	GeneBody	NM_002508.3	NID1
chr1	236329264	236329386	GeneBody	NM_003272.4	GPR137B
chr1	236557106	236557279	Promoter	NM_080738.4,NM_145861.4	EDARADD
chr1	237540524	237540713	GeneBody	NM_001035.3	RYR2
chr1	239832216	239832569	GeneBody	NM_000740.4,NM_001375980.1,NM_001375985.1,NM_001375981.1,NM_001375984.1,NM_001375979.1,NM_001375983.1,NM_001375978.1,NM_001347716.2,NM_001375982.1,NR_164748.1	CHRM3
chr1	240822138	240822230	Intergenic	NA	NA
chr1	241707595	241707738	GeneBody	NM_003679.5	KMO
chr1	242130291	242130395	Intergenic	NA	NA
chr1	242472799	242472926	GeneBody	NM_001195812.2,NM_001195811.2,NM_001372062.1,NM_001320272.2	PLD5
chr1	243654292	243654566	GeneBody	NM_181690.2,NM_006642.5,NM_001350247.2,NM_001350246.2,NM_001350248.2,NM_001350251.2,NM_001350249.2	AKT3,SDCCAG8
chr1	243655508	243655546	GeneBody	NM_181690.2,NM_006642.5,NM_001350247.2,NM_001350246.2,NM_001350248.2,NM_001350251.2,NM_001350249.2	AKT3,SDCCAG8
chr1	243658879	243659255	GeneBody	NM_181690.2,NM_006642.5,NM_001350247.2,NM_001350246.2,NM_001350248.2,NM_001350251.2,NM_001350249.2	AKT3,SDCCAG8
chr1	243659561	243659660	GeneBody	NM_181690.2,NM_006642.5,NM_001350247.2,NM_001350246.2,NM_001350248.2,NM_001350251.2,NM_001350249.2	AKT3,SDCCAG8
chr1	243659796	243659966	GeneBody	NM_181690.2,NM_006642.5,NM_001350247.2,NM_001350246.2,NM_001350248.2,NM_001350251.2,NM_001350249.2	AKT3,SDCCAG8
chr1	243664389	243664860	GeneBody	NM_001206729.2,NM_005465.7,NM_001370074.1,NM_181690.2	AKT3
chr1	244250623	244250960	Intergenic	NA	NA
chr1	244381684	244381837	Intergenic	NA	NA
chr1	245182070	245182210	GeneBody	NM_001290327.2,NM_001143943.1,NM_032328.4,NR_026587.1	EFCAB2
chr1	246384684	246384928	GeneBody	NM_001375963.1,NM_022743.3,NM_001167740.2,NM_001375962.1	SMYD3
chr1	246384964	246385206	GeneBody	NM_001375963.1,NM_022743.3,NM_001167740.2,NM_001375962.1	SMYD3
chr1	246943223	246943514	GeneBody	KIF28P	KIF28P
chr1	249192007	249192196	Intergenic	NA	NA
chr10	98535	98586	Intergenic	NA	NA
chr10	357762	357873	GeneBody	NM_014974.3	DIP2C
chr10	358047	358195	GeneBody	NM_014974.3	DIP2C
chr10	443560	443719	GeneBody	NM_014974.3	DIP2C
chr10	664324	664487	GeneBody	NM_014974.3	DIP2C
chr10	670434	670786	GeneBody	NM_014974.3	DIP2C
chr10	670804	671212	GeneBody	NM_014974.3	DIP2C
chr10	671317	671675	GeneBody	NM_014974.3	DIP2C
chr10	743144	743477	Intergenic	NA	NA
chr10	835644	836062	Intergenic	NA	NA
chr10	1090243	1090349	GeneBody	NM_004508.4,NM_001317956.2,NM_001317957.2,NR_134301.1,NM_001317955.2,NR_134300.2	IDI1
chr10	1206885	1207203	Promoter	NR_015376.2	LINC00200
chr10	1356066	1356283	GeneBody	NM_018702.4	ADARB2
chr10	1921306	1921479	Intergenic	NA	NA
chr10	1935899	1935957	Intergenic	NA	NA
chr10	3150313	3150478	GeneBody	NM_001323073.1,NM_001323070.1,NM_001323074.1,NM_001345944.1,NM_001242339.2,NM_001323072.2,NM_001323067.2,NM_001323069.2,NM_001323068.2,NM_002627.5,NM_001323071.2	PFKP
chr10	3335952	3336293	Intergenic	NA	NA
chr10	3336424	3336483	Intergenic	NA	NA
chr10	3373116	3373161	GeneBody	NR_131187.1	LOC105376360
chr10	3378513	3378707	GeneBody	NR_131187.1	LOC105376360
chr10	3765982	3766080	GeneBody	NR_131187.1	LOC105376360
chr10	3935173	3935470	Intergenic	NA	NA
chr10	3949754	3949890	Intergenic	NA	NA
chr10	4326244	4326339	Intergenic	NA	NA
chr10	4358487	4358841	Intergenic	NA	NA
chr10	5082386	5082530	Intergenic	NA	NA
chr10	5382795	5382931	Intergenic	NA	NA
chr10	5438560	5438626	GeneBody	NM_024803.3_2,NM_001171864.2_2	TUBAL3
chr10	5566459	5566861	Promoter	NM_005185.4,NR_120496.1,NR_120497.1	CALML3,CALML3-AS1
chr10	5566907	5567248	Promoter	NM_005185.4,NR_120496.1,NR_120497.1	CALML3,CALML3-AS1
chr10	5567286	5567676	Promoter	NM_005185.4,NR_120496.1,NR_120497.1	CALML3,CALML3-AS1
chr10	5567693	5568095	Promoter	NM_005185.4,NR_120496.1,NR_120497.1	CALML3,CALML3-AS1
chr10	5605826	5606200	Intergenic	NA	NA
chr10	5644010	5644162	Intergenic	NA	NA
chr10	5650745	5650792	Intergenic	NA	NA
chr10	5650898	5651052	Intergenic	NA	NA
chr10	5658105	5658305	Intergenic	NA	NA
chr10	5985456	5985768	Intergenic	NA	NA
chr10	6187829	6188242	Promoter	NM_001282630.3,NM_001145443.3,NM_001323016.2,NR_136554.2	PFKFB3
chr10	6390448	6390727	Promoter	NR_148966.1	LINC02656
chr10	6753631	6754059	Intergenic	NA	NA
chr10	6779857	6780122	Promoter	NR_138480.1	LINP1
chr10	7583390	7583668	Intergenic	NA	NA
chr10	8059383	8059667	Intergenic	NA	NA
chr10	8573014	8573300	Intergenic	NA	NA
chr10	8793969	8794062	Intergenic	NA	NA
chr10	8794519	8794629	Intergenic	NA	NA
chr10	9013526	9013585	Intergenic	NA	NA
chr10	9518677	9518882	Intergenic	NA	NA
chr10	10029312	10029444	Intergenic	NA	NA
chr10	10709601	10709741	GeneBody	NM_001326317.2,NM_001326318.2,NM_001326321.2,NM_001326319.2,NM_001326320.2,NM_001326323.2	CELF2
chr10	11421505	11421839	Intergenic	NA	NA
chr10	12364804	12365045	Intergenic	NA	NA
chr10	12821821	12822284	GeneBody	NM_001351032.2,NM_020397.4,NM_153498.4	CAMK1D
chr10	12826298	12826490	GeneBody	NM_001351032.2,NM_020397.4,NM_153498.4	CAMK1D
chr10	12826713	12826918	GeneBody	NM_001351032.2,NM_020397.4,NM_153498.4	CAMK1D
chr10	12853583	12853918	GeneBody	NM_001351032.2,NM_020397.4,NM_153498.4	CAMK1D
chr10	12854032	12854209	GeneBody	NM_001351032.2,NM_020397.4,NM_153498.4	CAMK1D
chr10	13013210	13013315	GeneBody	NM_031455.4,NM_001282658.2	CCDC3
chr10	13016647	13017091	GeneBody	NM_031455.4,NM_001282658.2	CCDC3
chr10	13459706	13459987	Intergenic	NA	NA
chr10	13703491	13703606	GeneBody	NM_001318338.2,NM_001318337.2,NM_001318336.2,NM_018027.5	FRMD4A
chr10	13732136	13732491	GeneBody	NM_001318338.2,NM_001318337.2,NM_001318336.2,NM_018027.5	FRMD4A
chr10	13732727	13732836	GeneBody	NM_001318338.2,NM_001318337.2,NM_001318336.2,NM_018027.5	FRMD4A
chr10	13748722	13749058	Promoter	NM_001318338.2	FRMD4A
chr10	13987004	13987122	GeneBody	NM_001318337.2,NM_001318336.2,NM_018027.5	FRMD4A
chr10	14400913	14401086	Intergenic	NA	NA
chr10	14578262	14578333	GeneBody	NM_001320740.1,NM_001320739.2,NM_001320738.2,NM_001320736.2,NM_001282698.2,NM_001282702.2,NM_001282701.2,NM_001282699.1,NM_001320737.1,NM_001282703.1,NM_001320735.2,NM_001282700.2,NM_001282696.2,NM_001282697.2,NM_001282695.2,NM_031453.4	FAM107B
chr10	14578441	14578559	GeneBody	NM_001320740.1,NM_001320739.2,NM_001320738.2,NM_001320736.2,NM_001282698.2,NM_001282702.2,NM_001282701.2,NM_001282699.1,NM_001320737.1,NM_001282703.1,NM_001320735.2,NM_001282700.2,NM_001282696.2,NM_001282697.2,NM_001282695.2,NM_031453.4	FAM107B
chr10	15125881	15126136	GeneBody	NM_001039844.3,NR_144471.1	ACBD7,ACBD7-DCLRE1CP1
chr10	15127271	15127391	GeneBody	NM_001039844.3,NR_144471.1	ACBD7,ACBD7-DCLRE1CP1
chr10	15822293	15822577	GeneBody	NM_024948.4,NM_001318330.2	MINDY3
chr10	16521788	16521903	GeneBody	NM_001261838.2,NM_001261836.2,NM_030664.5,NM_001261837.2,NM_001001484.3	PTER
chr10	16695447	16695531	GeneBody	NM_012425.4,NM_152724.3	RSU1
chr10	16819853	16819912	GeneBody	NM_012425.4,NM_152724.3	RSU1
chr10	16889683	16889778	GeneBody	NM_001081.4	CUBN
chr10	16890768	16891001	GeneBody	NM_001081.4	CUBN
chr10	17269601	17269916	Promoter	NM_003380.5,NR_108060.1	VIM-AS1,VIM
chr10	19026795	19026960	GeneBody	AIFM1P1	AIFM1P1
chr10	19777868	19778262	Promoter	HMGN1P20	HMGN1P20
chr10	20261415	20261561	GeneBody	NM_001282736.2,NM_032812.9	PLXDC2
chr10	20565921	20566051	GeneBody	NM_001282736.2,NM_032812.9	PLXDC2
chr10	20882929	20883060	Intergenic	NA	NA
chr10	20963691	20963794	Intergenic	NA	NA
chr10	21311181	21311389	GeneBody	NM_001377323.1,NM_001377325.1,NM_001377324.1,NM_001377322.1,NM_001173484.2,NM_213569.2,NM_001377328.1,NM_001377327.1,NM_001377326.1	NEBL
chr10	21549025	21549135	GeneBody	NM_001377327.1,NM_001377326.1	NEBL
chr10	21807165	21807251	GeneBody	NM_207371.4	SKIDA1
chr10	21807377	21807596	GeneBody	NM_207371.4	SKIDA1
chr10	21807865	21808018	GeneBody	NM_207371.4	SKIDA1
chr10	21813203	21813274	Promoter	NM_207371.4	SKIDA1
chr10	21817438	21817602	Intergenic	NA	NA
chr10	21817937	21818059	Intergenic	NA	NA
chr10	21821845	21822089	Promoter	NM_001195628.2,NM_001195630.2,NM_001195627.2,NM_001195626.3,NM_004641.4,NM_001324296.2,NM_001324297.2,NR_136736.2	MLLT10
chr10	22368948	22369052	Intergenic	NA	NA
chr10	22940357	22940503	GeneBody	NM_001330062.2,NM_005028.5	PIP4K2A
chr10	22940630	22940733	GeneBody	NM_001330062.2,NM_005028.5	PIP4K2A
chr10	23858381	23858422	Intergenic	NA	NA
chr10	24546261	24546347	GeneBody	NM_001282767.2,NM_001282768.2,NM_019590.5,NM_001098500.3	KIAA1217
chr10	24629467	24629712	GeneBody	NM_001282767.2,NM_001282768.2,NM_019590.5,NM_001098500.3	KIAA1217
chr10	25372454	25372896	Intergenic	NA	NA
chr10	28537287	28537384	GeneBody	NM_173496.5,NM_001318170.2,NR_134517.2,NR_134518.2	MPP7
chr10	28543703	28543863	GeneBody	NM_173496.5,NM_001318170.2,NR_134517.2,NR_134518.2	MPP7
chr10	28584650	28584728	GeneBody	NM_001318170.2,NR_134517.2,NR_134518.2	MPP7
chr10	28993921	28994050	Intergenic	NA	NA
chr10	29264217	29264427	Intergenic	NA	NA
chr10	29633102	29633523	Intergenic	NA	NA
chr10	29737293	29737609	GeneBody	NR_110928.1,NR_110929.1,NR_110926.1,NR_110925.1,NR_110922.1,NR_110921.1,NR_110920.1,NR_110927.1	SVIL-AS1
chr10	29923735	29923941	Promoter	NM_021738.3	SVIL
chr10	30237720	30237871	Intergenic	NA	NA
chr10	32556796	32557051	GeneBody	NM_025209.5,NM_001272004.3,NM_001382753.1,NM_001382755.1,NM_001272019.4,NR_168510.1,NR_168511.1,NM_001382754.1,NM_001282391.3,NR_168508.1	EPC1
chr10	32632675	32632793	GeneBody	NM_001382756.1,NM_025209.5,NM_001272004.3,NM_001382753.1,NM_001382755.1,NM_001272019.4,NR_168509.1,NR_168510.1,NR_168511.1,NM_001382754.1,NM_001282391.3,NR_168508.1	EPC1
chr10	33243935	33244097	GeneBody	NM_133376.3,NM_002211.4	ITGB1
chr10	33993587	33993753	Intergenic	NA	NA
chr10	34229207	34229388	Intergenic	NA	NA
chr10	34368045	34368365	Intergenic	NA	NA
chr10	35119283	35119658	Intergenic	NA	NA
chr10	35277279	35277585	Intergenic	NA	NA
chr10	35438344	35438513	GeneBody	NM_183012.1,NM_183011.1,NM_183060.3,NM_181571.3,NM_001881.4,NM_001352465.2,NM_001352466.2,NM_001267563.2,NM_001352467.2,NM_001267562.2,NM_183013.3	CREM
chr10	35926213	35926663	Intergenic	NA	NA
chr10	35927009	35927157	Intergenic	NA	NA
chr10	36239077	36239198	Intergenic	NA	NA
chr10	36264063	36264135	Intergenic	NA	NA
chr10	36405453	36405836	Intergenic	NA	NA
chr10	36406376	36406451	Intergenic	NA	NA
chr10	36461131	36461367	Intergenic	NA	NA
chr10	36471111	36471288	Intergenic	NA	NA
chr10	36739275	36739649	Intergenic	NA	NA
chr10	36968496	36968549	Intergenic	NA	NA
chr10	42730073	42730313	Intergenic	NA	NA
chr10	42848207	42848507	GeneBody	NR_024380.1	LOC441666
chr10	43449971	43450120	Intergenic	NA	NA
chr10	43707683	43708105	GeneBody	NM_001282862.2,NM_145313.4	RASGEF1A
chr10	43814879	43815063	Intergenic	NA	NA
chr10	44320473	44320654	Intergenic	NA	NA
chr10	44366386	44366651	GeneBody	NR_038268.1	LINC00840
chr10	44675859	44676022	Intergenic	NA	NA
chr10	45958875	45959191	GeneBody	NM_001282866.2_2,NM_001002266.3_2,NM_145021.6_2	MARCHF8
chr10	46978125	46978184	Intergenic	NA	NA
chr10	49378273	49378385	GeneBody	NM_001042512.3,NM_001018071.4,NM_001318191.1	FRMPD2
chr10	49727666	49727816	GeneBody	NM_001256024.2,NM_021226.4,NM_001347735.2,NM_001256025.3,NM_001347738.2,NR_144643.2,NR_144642.2,NR_144645.2,NR_144646.2,NR_144644.2,NR_045675.2	ARHGAP22
chr10	49873794	49873940	Intergenic	NA	NA
chr10	50289736	50289841	GeneBody	NM_001031746.5	VSTM4
chr10	50733867	50733936	Promoter	NM_170753.3	PGBD3
chr10	58776158	58776348	Intergenic	NA	NA
chr10	60271504	60271829	Promoter	NM_001080512.3	BICC1
chr10	60533418	60533606	GeneBody	NM_001080512.3	BICC1
chr10	60758822	60759071	Promoter	NR_108046.1	LINC00844
chr10	60771848	60772049	Intergenic	NA	NA
chr10	61842629	61842694	GeneBody	NM_001149.4,NM_020987.5,NM_001320874.2,NM_001204404.2,NM_001204403.2	ANK3
chr10	62159263	62159573	GeneBody	NM_001204404.2,NM_001204403.2	ANK3
chr10	62493609	62494026	Promoter	NM_001204403.2	ANK3
chr10	62916903	62917069	Intergenic	NA	NA
chr10	63167954	63168156	GeneBody	NM_178505.8,NR_134507.2	TMEM26
chr10	63213233	63213646	Promoter	NR_120643.1,NM_178505.8,NR_134508.2,NR_134507.2	TMEM26,TMEM26-AS1
chr10	63300825	63301070	Intergenic	NA	NA
chr10	63342485	63342591	Intergenic	NA	NA
chr10	64235391	64235602	GeneBody	NM_199450.3	ZNF365
chr10	64409812	64409928	Intergenic	NA	NA
chr10	64579205	64579470	Promoter	NM_001136178.2	EGR2
chr10	64875108	64875225	Intergenic	NA	NA
chr10	65661712	65661927	Promoter	RPL7AP50	RPL7AP50
chr10	67060883	67060913	Intergenic	NA	NA
chr10	70825606	70825758	Intergenic	NA	NA
chr10	71042507	71042637	GeneBody	NM_001358263.1,NM_001322364.2,NM_033497.3,NM_033498.3,NM_001322365.2,NM_033500.2	HK1
chr10	71263999	71264104	GeneBody	NM_001351263.2,NM_012339.5,NR_147091.2	TSPAN15
chr10	71390906	71391062	Promoter	NM_145306.3	FAM241B
chr10	71404865	71405073	Intergenic	NA	NA
chr10	71487511	71487734	Intergenic	NA	NA
chr10	71569935	71570076	GeneBody	NM_001368896.1,NM_080798.4,NM_001368898.1,NM_001368895.1,NM_001368897.1,NM_080805.4,NM_001368885.1,NM_001368883.1,NM_001368886.1,NM_080800.4,NM_080802.4,NM_080801.4,NM_001130103.2,NM_001368884.1,NM_001320951.2,NM_001368882.1	COL13A1
chr10	71704567	71704778	GeneBody	NM_001368896.1,NM_080798.4,NM_001368898.1,NM_001368895.1,NM_001368897.1,NM_080805.4,NM_001368885.1,NM_001368883.1,NM_001368886.1,NM_080800.4,NM_080802.4,NM_080801.4,NM_001130103.2,NM_001368884.1,NM_001320951.2,NM_001368882.1	COL13A1
chr10	72487212	72487342	GeneBody	NM_080722.4,NM_139155.3	ADAMTS14
chr10	72826852	72827108	Intergenic	NA	NA
chr10	72827142	72827404	Intergenic	NA	NA
chr10	73020630	73020858	GeneBody	NM_001244889.2,NM_170744.5	UNC5B
chr10	73334986	73335226	GeneBody	NM_001171932.2,NM_052836.4,NM_001171931.2,NM_001171930.2,NM_022124.6	CDH23
chr10	73663369	73663528	Intergenic	NA	NA
chr10	73679309	73679496	Intergenic	NA	NA
chr10	73683015	73683107	Intergenic	NA	NA
chr10	73730175	73730457	GeneBody	NM_004273.5	CHST3
chr10	73736814	73736899	GeneBody	NM_004273.5	CHST3
chr10	74368434	74368516	GeneBody	NM_001363513.2,NM_006077.4,NM_001195518.2	MICU1
chr10	74658547	74658795	GeneBody	NM_152635.3,NR_130125.2	OIT3
chr10	75674984	75675090	GeneBody	NM_001319191.2,NM_002658.6,NM_001145031.3,NR_160937.1,NR_160938.1	C10orf55,PLAU
chr10	76523076	76523189	Intergenic	NA	NA
chr10	76817971	76818209	GeneBody	NM_001384909.1,NM_001003892.3	DUSP29
chr10	77165617	77165774	Promoter	NR_110302.1	ZNF503-AS2
chr10	77165892	77165920	Promoter	NR_110302.1	ZNF503-AS2
chr10	77166073	77166372	GeneBody	NR_110302.1,NR_110300.1,NR_024422.1,NR_110299.1,NR_110301.1,NR_024421.1	ZNF503-AS2
chr10	77166381	77166683	GeneBody	NR_110302.1,NR_110300.1,NR_024422.1,NR_110299.1,NR_110301.1,NR_024421.1	ZNF503-AS2
chr10	77605207	77605327	GeneBody	NM_032024.5,NM_001305581.2,NR_131178.2	LRMDA
chr10	78957368	78957758	GeneBody	NM_001322837.2,NM_001271519.2,NM_001322836.2,NM_001161352.2,NM_001161353.2,NM_002247.4,NM_001322838.2,NM_001322830.2,NM_001322835.2,NM_001014797.3,NM_001322829.2,NM_001322832.2,NM_001271518.2	KCNMA1
chr10	79146703	79146837	GeneBody	NM_001322837.2,NM_001271519.2,NM_001322836.2,NM_001161352.2,NM_001161353.2,NM_002247.4,NM_001322830.2,NM_001322835.2,NM_001014797.3,NM_001322829.2,NM_001322832.2,NM_001271518.2	KCNMA1
chr10	79283921	79284117	GeneBody	NM_001322837.2,NM_001271519.2,NM_001322836.2,NM_001161352.2,NM_001161353.2,NM_002247.4,NM_001322830.2,NM_001322835.2,NM_001014797.3,NM_001322829.2,NM_001322832.2,NM_001271518.2	KCNMA1
chr10	79533525	79533897	Intergenic	NA	NA
chr10	80116858	80117101	Intergenic	NA	NA
chr10	80131159	80131325	Intergenic	NA	NA
chr10	80696684	80696770	Intergenic	NA	NA
chr10	80737310	80737516	GeneBody	NR_024431.2,NR_024429.1,NR_015429.1	ZMIZ1-AS1
chr10	80778649	80778841	GeneBody	NR_024431.2,NR_024429.1,NR_015429.1	ZMIZ1-AS1
chr10	80779294	80779418	GeneBody	NR_024431.2,NR_024429.1,NR_015429.1	ZMIZ1-AS1
chr10	80926138	80926350	GeneBody	NM_020338.4	ZMIZ1
chr10	80938425	80938781	GeneBody	NM_020338.4	ZMIZ1
chr10	80941563	80941662	GeneBody	NM_020338.4	ZMIZ1
chr10	82132859	82133018	Intergenic	NA	NA
chr10	82393245	82393393	GeneBody	NM_001145719.1,NM_207372.2,NM_001388272.1	SH2D4B
chr10	82756555	82756771	Intergenic	NA	NA
chr10	83189179	83189282	Intergenic	NA	NA
chr10	84724667	84724785	GeneBody	NM_001165973.2,NM_001165972.1,NM_001370081.1,NM_001010848.4,NM_001370084.1,NM_001370082.1,NR_163253.1,NR_163252.1,NR_163251.1	NRG3
chr10	85938438	85938476	GeneBody	NM_207373.3	C10orf99
chr10	85987711	85987799	Intergenic	NA	NA
chr10	85994005	85994179	GeneBody	NM_015613.3	LRIT1
chr10	86293751	86293913	Intergenic	NA	NA
chr10	86898835	86899037	Intergenic	NA	NA
chr10	86998349	86998658	Intergenic	NA	NA
chr10	88453451	88453552	GeneBody	NM_001080116.1,NM_001368067.1,NM_001080115.2,NM_001171611.2,NM_001368068.1,NM_001368063.1,NM_001080114.2,NM_001368066.1,NM_001368065.1,NM_007078.3,NM_001171610.2,NM_001368064.1	LDB3
chr10	88459048	88459080	GeneBody	NM_001080116.1,NM_001368067.1,NM_001080115.2,NM_001171611.2,NM_001368068.1,NM_001368063.1,NM_001080114.2,NM_001368066.1,NM_001368065.1,NM_007078.3,NM_001171610.2,NM_001368064.1	LDB3
chr10	88470413	88470792	GeneBody	NM_001080114.2,NM_001368066.1,NM_001368065.1,NM_007078.3,NM_001171610.2,NM_001368064.1	LDB3
chr10	88723957	88724035	Intergenic	NA	NA
chr10	88729086	88729463	Promoter	NM_133447.3,NM_006829.3,NR_170185.1,NR_170184.1,NR_170183.1,NR_170182.1,NR_170181.1,NR_170180.1,NR_170177.1,NR_170179.1,NR_170178.1	ADIRF,AGAP11,ADIRF-AS1
chr10	88729795	88730219	Promoter	NM_133447.3,NM_006829.3,NR_170185.1,NR_170184.1,NR_170183.1,NR_170182.1,NR_170181.1,NR_170180.1,NR_170177.1,NR_170179.1,NR_170178.1	ADIRF,AGAP11,ADIRF-AS1
chr10	88730269	88730636	Promoter	NM_133447.3,NR_170185.1,NR_170184.1,NR_170183.1,NR_170182.1,NR_170181.1,NR_170180.1,NR_170177.1,NR_170179.1,NR_170178.1	AGAP11,ADIRF-AS1
chr10	89305710	89305800	GeneBody	NM_001178118.2,NM_001178117.2,NM_004897.5	MINPP1
chr10	89358603	89358801	Intergenic	NA	NA
chr10	89801413	89801637	Intergenic	NA	NA
chr10	89833542	89833602	Intergenic	NA	NA
chr10	90003320	90003503	Intergenic	NA	NA
chr10	90995241	90995506	GeneBody	NM_001127605.3,NM_000235.4,NM_001288979.2	LIPA
chr10	91236800	91236944	GeneBody	NM_213606.4	SLC16A12
chr10	91677651	91677766	GeneBody	NR_110655.1	LINC01375
chr10	92590228	92590308	GeneBody	NM_019860.4,NM_019859.4,NM_000872.5	HTR7
chr10	93441218	93441349	Intergenic	NA	NA
chr10	94898051	94898093	Intergenic	NA	NA
chr10	95051126	95051414	Intergenic	NA	NA
chr10	95187938	95188103	GeneBody	NM_013451.4,NM_133337.3	MYOF
chr10	95532706	95532878	GeneBody	NM_001308276.2,NM_001308275.2,NM_005097.4,NR_131777.2	LGI1
chr10	95558912	95559025	Intergenic	NA	NA
chr10	95759843	95759916	GeneBody	NM_001288989.2,NM_016341.4	PLCE1
chr10	97033171	97033420	GeneBody	NM_020992.4	PDLIM1
chr10	97033451	97033705	GeneBody	NM_020992.4	PDLIM1
chr10	97048985	97049388	Promoter	NM_020992.4	PDLIM1
chr10	97174062	97174383	GeneBody	NM_001034955.2,NM_001034956.2,NM_001290296.2,NM_001384456.1,NM_001384463.1,NM_001384454.1,NM_001384457.1,NM_001034954.3,NM_001290294.2,NM_001377199.1,NM_001384459.1,NM_001384460.1,NM_001377203.1,NM_001377208.1,NM_001377206.1,NM_024991.3,NM_001377197.1,NM_001377201.1,NM_001384465.1,NM_001290298.3,NM_001377205.1,NM_001377198.1,NM_001377200.1,NM_015385.4,NM_001384458.1,NM_001384461.1,NM_001377207.1,…	SORBS1
chr10	97290500	97290790	GeneBody	NM_001384456.1,NM_001384463.1,NM_001384454.1,NM_001384457.1,NM_001034954.3,NM_001290294.2,NM_001377199.1,NM_001384459.1,NM_001384460.1,NM_001377203.1,NM_001377208.1,NM_001377206.1,NM_024991.3,NM_001377197.1,NM_001377201.1,NM_001384465.1,NM_001290298.3,NM_001377205.1,NM_001377198.1,NM_001377200.1,NM_015385.4,NM_001384458.1,NM_001384461.1,NM_001377207.1,NM_001384464.1,NM_001384452.1,NM_001384449.1,…	SORBS1
chr10	98415659	98415919	GeneBody	NM_152309.3	PIK3AP1
chr10	98751283	98751586	GeneBody	NM_001346516.2	LCOR
chr10	99581673	99581894	Intergenic	NA	NA
chr10	100368086	100368225	GeneBody	NM_021828.5,NM_001166246.1,NM_001166244.1,NM_001166245.1	HPSE2
chr10	102821564	102822048	Promoter	NM_030929.5,NM_001319303.2,NR_135067.2	KAZALD1
chr10	103200274	103200426	GeneBody	NM_003939.5,NM_001256856.2,NM_033637.4	BTRC
chr10	104315766	104315935	GeneBody	NM_001178133.2,NM_016169.4	SUFU
chr10	104433695	104434030	GeneBody	NM_004311.4	ARL3
chr10	105376247	105376671	GeneBody	NM_001365079.1,NM_014631.3	SH3PXD2A
chr10	105376708	105377108	GeneBody	NM_001365079.1,NM_014631.3	SH3PXD2A
chr10	105428282	105428535	GeneBody	NM_001365079.1,NM_014631.3	SH3PXD2A
chr10	105471566	105471753	GeneBody	NM_014631.3	SH3PXD2A
chr10	105531711	105531826	GeneBody	NM_014631.3	SH3PXD2A
chr10	105827260	105827641	GeneBody	NM_000494.4	COL17A1
chr10	106060752	106060934	GeneBody	NM_001191015.2,NM_001191014.2,NM_001191013.2,NM_183239.2	GSTO2
chr10	107153409	107153617	Intergenic	NA	NA
chr10	108275207	108275376	Intergenic	NA	NA
chr10	108830700	108830953	GeneBody	NM_001206571.2,NM_001206569.2,NM_001206572.2,NM_001013031.3,NM_001387556.1,NM_052918.5,NM_001206570.2	SORCS1
chr10	109185937	109186065	Intergenic	NA	NA
chr10	109241731	109241969	Intergenic	NA	NA
chr10	109502157	109502278	Intergenic	NA	NA
chr10	109891998	109892139	Intergenic	NA	NA
chr10	111635158	111635341	GeneBody	NM_001324136.1,NM_001324131.2,NM_001324133.2,NM_020383.4,NM_001167604.2,NM_001324135.2,NM_001324134.2,NM_001324132.2,NM_001324128.2	XPNPEP1
chr10	111766555	111767007	Promoter	NM_001121.4,NM_016824.5,NM_001320594.2,NM_001320593.2,NM_019903.5,NM_001320592.2,NR_038943.1	ADD3-AS1,ADD3
chr10	111987791	111988094	GeneBody	NM_005962.5,NM_001008541.1,NM_130439.3	MXI1
chr10	112116397	112116559	Intergenic	NA	NA
chr10	112269054	112269260	GeneBody	NM_004419.4	DUSP5
chr10	112302773	112302836	Intergenic	NA	NA
chr10	112543423	112543445	GeneBody	NM_001134363.3	RBM20
chr10	112553278	112553409	GeneBody	NM_001134363.3	RBM20
chr10	112587711	112588050	GeneBody	NM_001134363.3	RBM20
chr10	114022466	114022709	Intergenic	NA	NA
chr10	114058380	114058648	Promoter	NR_106772.1,NR_106771.1	MIR6715A,MIR6715B
chr10	114228161	114228376	GeneBody	NM_001365710.2,NM_001365714.1,NM_145206.4,NM_001318205.2,NM_001318203.2,NM_001365712.1,NM_001365711.1,NM_001365713.1	VTI1A
chr10	114519222	114519305	GeneBody	NM_145206.4,NM_001318205.2,NM_001318203.2,NM_001365712.1,NM_001365711.1,NM_001365713.1	VTI1A
chr10	115254484	115254829	Intergenic	NA	NA
chr10	115255963	115256450	Intergenic	NA	NA
chr10	115280518	115280679	Intergenic	NA	NA
chr10	115406680	115406790	GeneBody	NM_001261463.2,NM_198060.4,NM_001322945.2,NM_006175.5	NRAP
chr10	115751001	115751377	Intergenic	NA	NA
chr10	115828267	115828400	Intergenic	NA	NA
chr10	116153431	116153636	GeneBody	NM_001351068.2,NM_001351067.2,NM_001351064.2,NM_001351071.2,NM_001351072.2,NM_001351070.2,NM_001351073.2,NM_001287824.2,NM_001351065.2,NM_001351078.2,NM_001351077.2,NM_001351079.2,NM_001351080.2,NM_001351066.2,NM_001001936.3,NM_032550.4,NM_001351069.2,NM_001351074.2,NM_001351075.2,NM_001351076.2	AFAP1L2
chr10	116157769	116157928	GeneBody	NM_001351068.2,NM_001351067.2,NM_001351064.2,NM_001351071.2,NM_001351072.2,NM_001351070.2,NM_001351073.2,NM_001287824.2,NM_001351065.2,NM_001351078.2,NM_001351077.2,NM_001351079.2,NM_001351080.2,NM_001351066.2,NM_001001936.3,NM_032550.4,NM_001351069.2,NM_001351074.2,NM_001351075.2,NM_001351076.2	AFAP1L2
chr10	116159375	116159468	GeneBody	NM_001351068.2,NM_001351067.2,NM_001351064.2,NM_001351071.2,NM_001351072.2,NM_001351070.2,NM_001351073.2,NM_001287824.2,NM_001351065.2,NM_001351078.2,NM_001351077.2,NM_001351079.2,NM_001351080.2,NM_001351066.2,NM_001001936.3,NM_032550.4,NM_001351069.2,NM_001351074.2,NM_001351075.2,NM_001351076.2	AFAP1L2
chr10	116160167	116160360	GeneBody	NM_001351068.2,NM_001351067.2,NM_001351064.2,NM_001351071.2,NM_001351072.2,NM_001351070.2,NM_001351073.2,NM_001287824.2,NM_001351065.2,NM_001351078.2,NM_001351077.2,NM_001351079.2,NM_001351080.2,NM_001351066.2,NM_001001936.3,NM_032550.4,NM_001351069.2,NM_001351074.2,NM_001351075.2,NM_001351076.2	AFAP1L2
chr10	116162720	116162983	Promoter	NM_001351068.2,NM_001351067.2,NM_001351064.2,NM_001351071.2,NM_001351072.2,NM_001351070.2,NM_001351073.2,NM_001287824.2,NM_001351065.2,NM_001351078.2,NM_001351077.2,NM_001351079.2,NM_001351080.2,NM_001351066.2,NM_001001936.3,NM_032550.4,NM_001351069.2,NM_001351074.2,NM_001351075.2,NM_001351076.2	AFAP1L2
chr10	116251786	116251871	GeneBody	NM_001322889.2,NM_001322894.2,NM_001322891.2,NM_001322893.2,NM_001322899.2,NM_006720.4,NM_001322888.2,NM_001352443.2,NM_001322895.2,NM_001322890.2,NM_001322892.2,NM_001322898.2,NM_001322897.2,NM_001322896.2,NM_001322900.2,NM_001352442.2,NM_002313.7,NM_001003407.2,NM_001322883.2,NM_001322887.2,NM_001322886.3,NM_001322884.3,NM_001322885.3,NM_001352440.1,NM_001352441.1,NM_001322882.2	ABLIM1
chr10	116442932	116443049	Promoter	NM_001003407.2,NM_001322883.2,NM_001322887.2,NM_001322882.2	ABLIM1
chr10	116443187	116443620	Promoter	NM_001003407.2,NM_001322883.2,NM_001322887.2,NM_001322882.2	ABLIM1
chr10	117829253	117829551	GeneBody	NM_001348099.3,NM_145793.7,NM_001382559.2,NM_001348098.4,NM_001382558.2,NM_001382560.2,NM_001382561.2,NM_001348096.3,NM_005264.8,NM_001145453.4,NM_001382556.2,NM_001382557.2	GFRA1
chr10	117884668	117884985	GeneBody	NM_001348099.3,NM_145793.7,NM_001382559.2,NM_001348098.4,NM_001382558.2,NM_001382560.2,NM_001382561.2,NM_001348096.3,NM_005264.8,NM_001145453.4,NM_001382556.2,NM_001382557.2	GFRA1
chr10	119867773	119868007	GeneBody	NR_026940.1,NR_026939.1	CASC2
chr10	119868076	119868351	GeneBody	NR_026940.1,NR_026939.1	CASC2
chr10	120062068	120062251	GeneBody	NM_022063.3,NM_001134672.2	FAM204A
chr10	121154807	121154985	GeneBody	NM_005308.3	GRK5
chr10	121181758	121181876	GeneBody	NM_005308.3	GRK5
chr10	121413767	121414102	GeneBody	NM_004281.4	BAG3
chr10	121417389	121417600	GeneBody	NM_004281.4	BAG3
chr10	121428281	121428427	GeneBody	NM_004281.4	BAG3
chr10	121429392	121429747	GeneBody	NM_004281.4	BAG3
chr10	121439135	121439602	Intergenic	NA	NA
chr10	121502952	121503170	GeneBody	NM_001243195.2,NM_014937.4	INPP5F
chr10	121868860	121868940	Intergenic	NA	NA
chr10	122228883	122229037	GeneBody	NM_001318169.2,NM_001318168.2,NM_001318167.2,NM_001318166.2,NM_001030059.3,NR_134516.1	PLPP4
chr10	122578037	122578088	GeneBody	NR_033850.1	WDR11-AS1
chr10	122784642	122784812	Intergenic	NA	NA
chr10	122784936	122785170	Intergenic	NA	NA
chr10	122954718	122954916	Intergenic	NA	NA
chr10	122955020	122955148	Intergenic	NA	NA
chr10	122987135	122987288	Intergenic	NA	NA
chr10	123206880	123207152	Intergenic	NA	NA
chr10	123219136	123219351	Intergenic	NA	NA
chr10	123269990	123270226	GeneBody	NM_001320654.2,NM_001144913.1,NM_001144919.2,NM_001144916.2,NM_001144915.2,NM_000141.5,NM_001320658.2,NM_001144917.2,NM_001144918.2,NM_001144914.1,NM_023029.2,NM_022970.3,NR_073009.2	FGFR2
chr10	123291277	123291585	Promoter	NM_001320654.2	FGFR2
chr10	123291738	123292123	Promoter	NM_001320654.2	FGFR2
chr10	123384560	123384863	Intergenic	NA	NA
chr10	123454215	123454562	Intergenic	NA	NA
chr10	123695190	123695353	GeneBody	NR_120495.1	ATE1-AS1
chr10	124219445	124219742	Promoter	NM_002775.5	HTRA1
chr10	124251519	124251760	GeneBody	NM_002775.5	HTRA1
chr10	124527640	124527831	GeneBody	NR_003570.2	DMBT1L1
chr10	125536485	125536689	GeneBody	NM_198148.3	CPXM2
chr10	125937626	125937760	Intergenic	NA	NA
chr10	125983455	125983526	Intergenic	NA	NA
chr10	125990394	125990610	Intergenic	NA	NA
chr10	126037380	126037632	Intergenic	NA	NA
chr10	126037752	126038140	Intergenic	NA	NA
chr10	126234378	126234566	GeneBody	NM_001318331.2,NM_001167880.2,NM_022126.4	LHPP
chr10	126254149	126254415	GeneBody	NM_001318331.2,NM_001167880.2,NM_022126.4	LHPP
chr10	126267541	126267969	GeneBody	NM_001318331.2,NM_001167880.2,NM_022126.4	LHPP
chr10	126308212	126308567	GeneBody	NM_014661.4	FAM53B
chr10	126315071	126315460	GeneBody	NM_014661.4	FAM53B
chr10	126363920	126364101	GeneBody	NM_014661.4	FAM53B
chr10	126380513	126380572	GeneBody	NM_014661.4	FAM53B
chr10	126421791	126422173	GeneBody	NM_014661.4	FAM53B
chr10	126428758	126428850	GeneBody	NM_014661.4	FAM53B
chr10	126890904	126891071	Intergenic	NA	NA
chr10	127005643	127005757	Intergenic	NA	NA
chr10	127158265	127158399	Intergenic	NA	NA
chr10	127235563	127235777	Intergenic	NA	NA
chr10	127236120	127236313	Intergenic	NA	NA
chr10	127378392	127378552	GeneBody	NR_033848.1	LOC283038
chr10	127739053	127739389	GeneBody	NM_021641.5,NM_001288974.2,NM_001288975.2,NM_003474.6,NM_001288973.2	ADAM12
chr10	127746561	127746655	GeneBody	NM_021641.5,NM_001288974.2,NM_001288975.2,NM_003474.6,NM_001288973.2	ADAM12
chr10	127798983	127799226	GeneBody	NM_021641.5,NM_001288974.2,NM_001288975.2,NM_003474.6,NM_001288973.2	ADAM12
chr10	128021637	128021765	GeneBody	NM_021641.5,NM_001288974.2,NM_001288975.2,NM_003474.6,NM_001288973.2	ADAM12
chr10	128128933	128129083	GeneBody	NR_148989.1,NM_001004298.4,NM_001350921.2,NM_001350922.2,NR_146939.2	C10orf90,LOC728158
chr10	128393117	128393351	Intergenic	NA	NA
chr10	128598951	128599019	GeneBody	NM_001377561.1,NM_001377548.1,NM_001377560.1,NM_001377558.1,NM_001377554.1,NM_001377550.1,NM_001377553.1,NM_001377556.1,NM_001380.5,NM_001377543.1,NM_001377547.1,NM_001377546.1,NM_001290223.2,NM_001377544.1	DOCK1
chr10	128599139	128599529	GeneBody	NM_001377561.1,NM_001377548.1,NM_001377560.1,NM_001377558.1,NM_001377554.1,NM_001377550.1,NM_001377553.1,NM_001377556.1,NM_001380.5,NM_001377543.1,NM_001377547.1,NM_001377546.1,NM_001290223.2,NM_001377544.1	DOCK1
chr10	129064149	129064417	GeneBody	NM_001377561.1,NM_001377548.1,NM_001377560.1,NM_001377558.1,NM_001377554.1,NM_001377550.1,NM_001377553.1,NM_001377556.1,NM_001380.5,NM_001377543.1,NM_001377547.1,NM_001377546.1,NM_001290223.2,NM_001377544.1	DOCK1
chr10	129603160	129603322	Intergenic	NA	NA
chr10	129775699	129776131	GeneBody	NM_001323356.2,NM_001323355.2,NM_006504.6,NM_001316676.2	PTPRE
chr10	129847369	129847740	Promoter	NM_001323357.2,NM_130435.5	PTPRE
chr10	129854548	129854758	GeneBody	NM_001323357.2,NM_130435.5,NM_001323354.2,NM_001316677.2,NM_001323356.2,NM_001323355.2,NM_006504.6,NM_001316676.2	PTPRE
chr10	129854936	129855200	GeneBody	NM_001323357.2,NM_130435.5,NM_001323354.2,NM_001316677.2,NM_001323356.2,NM_001323355.2,NM_006504.6,NM_001316676.2	PTPRE
chr10	129862208	129862361	Promoter	NR_136149.1,NR_136150.1	AS-PTPRE
chr10	130364955	130365067	Intergenic	NA	NA
chr10	130377618	130377759	Intergenic	NA	NA
chr10	130679026	130679073	Intergenic	NA	NA
chr10	130739829	130739963	Intergenic	NA	NA
chr10	131078153	131078191	Intergenic	NA	NA
chr10	131584844	131584900	Intergenic	NA	NA
chr10	131610829	131611047	Intergenic	NA	NA
chr10	131614668	131614825	Intergenic	NA	NA
chr10	131700973	131701366	GeneBody	NM_001375380.1,NM_001375379.1,NM_001375389.1,NM_001375391.1,NM_001375390.1,NM_001005463.3,NM_001375392.1	EBF3
chr10	133742081	133742192	Intergenic	NA	NA
chr10	134096565	134096936	GeneBody	NM_001318879.2,NM_173575.4,NM_001318878.2	STK32C
chr10	134097052	134097394	GeneBody	NM_001318879.2,NM_173575.4,NM_001318878.2	STK32C
chr10	134106990	134107366	GeneBody	NM_001318879.2,NM_173575.4,NM_001318878.2	STK32C
chr10	134251759	134252150	Intergenic	NA	NA
chr10	134291248	134291516	Intergenic	NA	NA
chr10	134384261	134384626	GeneBody	NM_005539.5	INPP5A
chr10	134384743	134384965	GeneBody	NM_005539.5	INPP5A
chr10	135084432	135084614	GeneBody	NM_001109.5,NM_001164489.2,NM_001164490.2	ADAM8
chr10	135084726	135085146	GeneBody	NM_001109.5,NM_001164489.2,NM_001164490.2	ADAM8
chr10	135492174	135492419	Promoter	DUX4L13,DUX4L14	DUX4L14,DUX4L13
chr11	354660	355007	Intergenic	NA	NA
chr11	355170	355332	Intergenic	NA	NA
chr11	391664	392078	Promoter	NM_001303029.2	PKP3
chr11	392132	392568	Promoter	NM_007183.4,NM_001303029.2	PKP3
chr11	392591	393037	Promoter	NM_007183.4,NM_001303029.2	PKP3
chr11	665663	665813	GeneBody	NM_021008.4,NM_001367390.1,NM_001293634.1	DEAF1
chr11	665929	666133	GeneBody	NM_021008.4,NM_001367390.1,NM_001293634.1	DEAF1
chr11	696849	697162	Promoter	NM_001276253.2,NM_001042463.3,NM_001276274.2,NM_001384408.1,NM_174940.4,NM_021008.4,NM_001293634.1	TMEM80,DEAF1
chr11	1254124	1254582	GeneBody	NM_002458.3	MUC5B
chr11	1282923	1283270	GeneBody	NM_002458.3	MUC5B
chr11	1325634	1325862	Promoter	NM_001318514.2	TOLLIP
chr11	1419145	1419380	GeneBody	NM_003957.4,NM_001256627.2,NM_001256629.2,NR_046331.2	BRSK2
chr11	1468511	1468677	GeneBody	NM_001256630.1,NM_001282218.2,NM_003957.4,NM_001256627.2,NM_001256629.2,NR_046331.2	BRSK2
chr11	1552849	1553282	Intergenic	NA	NA
chr11	1553974	1554242	Intergenic	NA	NA
chr11	1555886	1556152	Intergenic	NA	NA
chr11	1562611	1562915	Intergenic	NA	NA
chr11	1722215	1722612	Intergenic	NA	NA
chr11	1722785	1722937	Intergenic	NA	NA
chr11	1754686	1754842	GeneBody	NM_001170820.4	IFITM10
chr11	1767678	1768172	GeneBody	NM_001170820.4	IFITM10
chr11	1768303	1768788	GeneBody	NM_001170820.4	IFITM10
chr11	1768816	1769275	GeneBody	NM_001170820.4	IFITM10
chr11	1842255	1842489	Intergenic	NA	NA
chr11	1856530	1856763	Promoter	NM_001290334.2,NM_138567.5,NM_001290333.2,NM_001290332.2	SYT8
chr11	1867371	1867583	Intergenic	NA	NA
chr11	1948838	1949156	GeneBody	NM_001367852.1,NM_001367849.1,NM_001367844.1,NM_001367842.1,NM_001367843.1,NM_001367847.1,NM_001367851.1,NM_001367850.1,NM_001367845.1,NM_001042782.3,NM_001042780.3,NM_006757.4,NM_001367848.1,NM_001042781.3,NM_001363561.2,NM_001367846.1,NM_001297646.2	TNNT3
chr11	2405518	2405659	GeneBody	NM_004356.4,NM_001297649.2	CD81
chr11	2596062	2596482	GeneBody	NM_181798.1,NM_000218.3	KCNQ1
chr11	2621110	2621424	GeneBody	NM_181798.1,NM_000218.3	KCNQ1
chr11	2749995	2750057	GeneBody	NM_181798.1,NM_000218.3	KCNQ1
chr11	2765455	2765517	GeneBody	NM_181798.1,NM_000218.3	KCNQ1
chr11	2818343	2818775	GeneBody	NM_181798.1,NM_000218.3	KCNQ1
chr11	2859926	2860371	GeneBody	NM_181798.1,NM_000218.3	KCNQ1
chr11	2865203	2865570	GeneBody	NR_130721.1,NM_181798.1,NM_000218.3	KCNQ1-AS1,KCNQ1
chr11	2924454	2924857	Promoter	NM_001315501.2,NM_001315502.2,NM_002555.6,NR_169304.1,NR_169305.1	SLC22A18AS,SLC22A18
chr11	3209626	3209965	Intergenic	NA	NA
chr11	3217430	3217834	Intergenic	NA	NA
chr11	3392153	3392254	GeneBody	NM_001256825.2,NM_001256823.2,NM_001242841.2,NM_001256824.2,NM_001242842.2,NM_001242843.2,NM_001130520.3,NM_001130519.3,NM_007152.5,NR_040083.2,NR_046382.2,NR_046381.2	ZNF195
chr11	3504227	3504371	Intergenic	NA	NA
chr11	3504505	3504671	Intergenic	NA	NA
chr11	6340067	6340318	Promoter	NM_145040.3	CAVIN3
chr11	6340427	6340804	Promoter	NM_145040.3	CAVIN3
chr11	7926340	7926640	Promoter	NR_036678.1	LOC283299
chr11	8642026	8642092	GeneBody	NM_014818.2,NM_001388022.1,NM_001388023.1	TRIM66
chr11	8772182	8772290	GeneBody	NM_001376502.1,NM_213618.2,NM_001376498.1,NM_001376500.1,NM_001376501.1,NM_001376503.1,NM_001376504.1,NM_001376499.1,NM_001376506.1,NM_001376505.1,NM_001376497.1,NM_001376495.1,NM_139157.3,NM_001376496.1,NM_005418.4,NR_164819.1,NR_164821.1,NR_164820.1,NR_164818.1,NR_164817.1,NR_164815.1,NR_164816.1,NR_164814.1,NR_164822.1	DENND2B
chr11	8788396	8788676	Promoter	NR_120590.1	LOC102724784
chr11	8788802	8788890	Promoter	NR_120590.1	LOC102724784
chr11	8789579	8789642	Promoter	NR_120590.1	LOC102724784
chr11	8830377	8830410	Promoter	NM_213618.2,NM_001376498.1,NM_001376500.1,NM_001376501.1,NM_001376503.1,NM_001376504.1,NM_001376499.1,NM_001376506.1,NM_001376505.1,NR_164819.1,NR_164821.1,NR_164820.1,NR_164818.1,NR_164817.1,NR_164815.1,NR_164816.1	DENND2B
chr11	8903150	8903386	GeneBody	NM_005418.4	DENND2B
chr11	8935818	8936009	GeneBody	NM_001206648.2,NM_001206646.2,NM_001206647.2,NM_020642.4,NR_045418.2,NR_045417.2	AKIP1
chr11	9647150	9647221	Intergenic	NA	NA
chr11	9830777	9830809	GeneBody	NM_001386339.1,NM_030962.4,NM_001386342.1,NR_036485.1	SBF2-AS1,SBF2
chr11	10397546	10397773	GeneBody	NR_103765.1	CAND1.11
chr11	10512541	10512768	GeneBody	NM_001172430.1,NM_001025390.2,NM_001025389.2,NM_000480.3,NM_001172431.2	AMPD3
chr11	10714430	10714475	Promoter	NM_001100167.3,NM_001100163.3,NM_130385.4,NM_001206880.2,NM_001206881.2	IRAG1
chr11	10743770	10744046	Intergenic	NA	NA
chr11	10881034	10881132	Promoter	NR_034137.1,NM_021211.4,NM_001143667.2	ZBED5-AS1,ZBED5
chr11	11369254	11369508	GeneBody	NM_198516.3,NM_001363464.2	GALNT18
chr11	11371057	11371259	GeneBody	NM_198516.3,NM_001363464.2	GALNT18
chr11	11991193	11991689	GeneBody	NM_001018057.2,NM_015881.6,NM_001330220.3,NM_013253.5	DKK3
chr11	12074287	12074665	GeneBody	NR_135109.1	LINC02547
chr11	12306435	12306643	Promoter	NM_032867.4	MICALCL
chr11	12398417	12398600	Promoter	NM_018222.5	PARVA
chr11	12431917	12432189	GeneBody	NM_018222.5	PARVA
chr11	12435196	12435358	GeneBody	NM_018222.5	PARVA
chr11	12836148	12836639	GeneBody	NM_021961.6	TEAD1
chr11	12860389	12860543	GeneBody	NM_021961.6	TEAD1
chr11	13095224	13095514	Intergenic	NA	NA
chr11	13230001	13230350	Intergenic	NA	NA
chr11	13281956	13282133	Intergenic	NA	NA
chr11	14076323	14076622	GeneBody	NM_006108.4_2	SPON1
chr11	15823458	15823551	Intergenic	NA	NA
chr11	15850294	15850403	Intergenic	NA	NA
chr11	15927423	15927643	Intergenic	NA	NA
chr11	17994506	17994712	GeneBody	NM_012139.4,NR_104040.2,NR_104041.2	SERGEF
chr11	19835030	19835374	GeneBody	NM_145117.5,NM_182964.6,NM_001244963.2,NM_001111018.2	NAV2
chr11	19868042	19868147	GeneBody	NM_145117.5,NM_182964.6,NM_001244963.2,NM_001111018.2	NAV2
chr11	20047039	20047318	GeneBody	NM_001111019.3,NM_145117.5,NM_182964.6,NM_001244963.2,NM_001111018.2	NAV2
chr11	20066456	20066703	GeneBody	NR_046672.1,NM_001111019.3,NM_145117.5,NM_182964.6,NM_001244963.2,NM_001111018.2	NAV2-AS2,NAV2
chr11	20066727	20066979	GeneBody	NR_046672.1,NM_001111019.3,NM_145117.5,NM_182964.6,NM_001244963.2,NM_001111018.2	NAV2-AS2,NAV2
chr11	20067090	20067211	GeneBody	NR_046672.1,NM_001111019.3,NM_145117.5,NM_182964.6,NM_001244963.2,NM_001111018.2	NAV2-AS2,NAV2
chr11	20942263	20942368	GeneBody	NM_006157.5,NM_001288714.1,NM_201551.2,NM_001288713.1	NELL1
chr11	21686237	21686439	Intergenic	NA	NA
chr11	27213013	27213092	GeneBody	NR_125766.1,NR_125767.1,NR_125768.1	BBOX1-AS1
chr11	27270537	27270667	Intergenic	NA	NA
chr11	27389931	27390166	GeneBody	NM_018490.5,NM_001346432.2	LGR4
chr11	27417292	27417373	GeneBody	NM_018490.5,NM_001346432.2	LGR4
chr11	27843117	27843345	Intergenic	NA	NA
chr11	30373872	30374239	Intergenic	NA	NA
chr11	30465776	30465832	GeneBody	NM_001377955.1,NM_001377954.1,NM_001377953.1,NM_001377952.1,NM_001584.3,NR_165346.1,NR_165347.1,NR_165345.1,NR_165344.1,NR_165342.1,NR_165337.1,NR_165338.1,NR_165340.1,NR_165348.1,NR_165341.1,NR_165339.1,NR_165336.1,NM_001145399.3,NM_001377956.1	MPPED2
chr11	30605349	30605798	Promoter	NM_001377955.1,NM_001377954.1,NM_001377953.1,NM_001377952.1,NM_001377956.1,NR_165343.1,NR_165346.1,NR_165347.1,NR_165345.1,NR_165344.1	MPPED2
chr11	32016668	32016845	Intergenic	NA	NA
chr11	32852394	32852631	Promoter	NM_024081.6	PRRG4
chr11	33673883	33673942	GeneBody	NM_012194.3	KIAA1549L
chr11	34334809	34334875	GeneBody	NM_145804.3	ABTB2
chr11	34501693	34501831	GeneBody	NM_198381.2,NM_001243081.2,NM_001422.4,NM_001243080.2	ELF5
chr11	34580197	34580490	Intergenic	NA	NA
chr11	34851840	34852020	Intergenic	NA	NA
chr11	34876731	34876833	Intergenic	NA	NA
chr11	35134102	35134324	Intergenic	NA	NA
chr11	36250714	36250870	GeneBody	NM_001304263.2,NM_001304264.2,NM_174902.4	LDLRAD3
chr11	36383567	36383786	GeneBody	NM_001160167.2	PRR5L
chr11	38210803	38210996	Intergenic	NA	NA
chr11	38361229	38361393	Intergenic	NA	NA
chr11	40410893	40410941	GeneBody	NM_001258419.2,NM_020929.3	LRRC4C
chr11	40475999	40476176	GeneBody	NM_001258419.2,NM_020929.3	LRRC4C
chr11	41059536	41059738	GeneBody	NM_001258419.2,NM_020929.3	LRRC4C
chr11	43289669	43289843	Promoter	NR_033868.1	HNRNPKP3
chr11	43757430	43757532	GeneBody	NM_016142.3	HSD17B12
chr11	43973210	43973504	Intergenic	NA	NA
chr11	44446087	44446358	Intergenic	NA	NA
chr11	44585495	44585658	Promoter	NM_001024844.2,NM_002231.4	CD82
chr11	44772615	44772769	GeneBody	NM_130783.5	TSPAN18
chr11	44783123	44783457	GeneBody	NM_130783.5	TSPAN18
chr11	44870094	44870389	GeneBody	NM_130783.5	TSPAN18
chr11	44871784	44872019	GeneBody	NM_130783.5	TSPAN18
chr11	44874487	44874572	GeneBody	NM_130783.5	TSPAN18
chr11	44989183	44989533	Intergenic	NA	NA
chr11	45185724	45186121	GeneBody	NM_001384650.1,NM_001256696.2,NM_001256695.2,NM_001384649.1,NM_001384648.1,NM_001359633.2	PRDM11
chr11	45470700	45470974	Intergenic	NA	NA
chr11	45854600	45854712	Intergenic	NA	NA
chr11	46048255	46048383	GeneBody	NM_001352029.1,NM_001352028.1,NM_001352032.3,NM_001352025.3,NM_001352027.3,NM_016621.5,NM_001352026.3,NM_001352031.3,NM_001101802.3,NM_001352030.3,NR_165446.1,NR_147890.3	PHF21A
chr11	46367687	46368050	Promoter	NM_001199267.2,NM_001199268.2,NM_003646.4,NM_001199266.2,NM_201533.3	DGKZ
chr11	46589656	46589879	GeneBody	NM_001367468.1,NM_001387011.1,NM_001300731.2,NM_001267782.2,NM_001367471.1,NM_001267783.2,NM_001367469.1,NM_001367470.1,NM_017749.3,NR_160027.1	AMBRA1
chr11	48967532	48967653	Promoter	TRIM51CP	TRIM51CP
chr11	49002767	49003140	GeneBody	TRIM51GP	TRIM51GP
chr11	57007324	57007465	Intergenic	NA	NA
chr11	57407420	57407729	Promoter	NR_029673.1	MIR130A
chr11	57558693	57558972	GeneBody	NM_001085469.2,NM_001085465.2,NM_001085468.2,NM_001085464.2,NM_001085466.2,NM_001085463.2,NM_001206887.2,NM_001206888.2,NM_001206886.2,NM_001206884.2,NM_001206883.2,NM_001085462.2,NM_001206889.2,NM_001085460.2,NM_001206890.2,NM_001085467.2,NM_001206891.2,NM_001331.3,NM_001085461.2,NM_001085459.2,NM_001206885.2,NM_001085458.2,NR_037646.1	CTNND1,TMX2-CTNND1
chr11	57558976	57559255	GeneBody	NM_001085469.2,NM_001085465.2,NM_001085468.2,NM_001085464.2,NM_001085466.2,NM_001085463.2,NM_001206887.2,NM_001206888.2,NM_001206886.2,NM_001206884.2,NM_001206883.2,NM_001085462.2,NM_001206889.2,NM_001085460.2,NM_001206890.2,NM_001085467.2,NM_001206891.2,NM_001331.3,NM_001085461.2,NM_001085459.2,NM_001206885.2,NM_001085458.2,NR_037646.1	CTNND1,TMX2-CTNND1
chr11	57894460	57894791	Promoter	NM_001005211.2	OR9I1
chr11	58731056	58731348	GeneBody	NR_033853.2	LOC283194
chr11	58731354	58731646	GeneBody	NR_033853.2	LOC283194
chr11	59659418	59659564	Intergenic	NA	NA
chr11	60749983	60750413	GeneBody	NM_001254750.2,NM_001254751.2,NM_006725.5,NR_045638.2	CD6
chr11	60918416	60918690	GeneBody	NM_017966.5	VPS37C
chr11	61267363	61267614	Intergenic	NA	NA
chr11	61273281	61273639	Intergenic	NA	NA
chr11	61322624	61323028	GeneBody	NM_001370211.1,NM_001365809.2,NM_001300773.2,NM_001252065.2,NM_004200.4	SYT7
chr11	61323048	61323447	GeneBody	NM_001370211.1,NM_001365809.2,NM_001300773.2,NM_001252065.2,NM_004200.4	SYT7
chr11	61323582	61323674	GeneBody	NM_001370211.1,NM_001365809.2,NM_001300773.2,NM_001252065.2,NM_004200.4	SYT7
chr11	61370758	61370991	GeneBody	NR_110189.1	LOC101927495
chr11	61485730	61486042	GeneBody	NM_006133.3	DAGLA
chr11	61486149	61486499	GeneBody	NM_006133.3	DAGLA
chr11	61516896	61517326	Intergenic	NA	NA
chr11	61910192	61910465	GeneBody	NM_020238.3,NM_001040694.2	INCENP
chr11	62040052	62040191	GeneBody	NM_002411.4	SCGB2A2
chr11	62064964	62065067	Promoter	NM_206998.2	SCGB1D4
chr11	62247199	62247248	GeneBody	NM_024060.4	AHNAK
chr11	62308728	62308841	GeneBody	NM_001346446.2,NM_001346445.2,NM_001620.3,NM_024060.4	AHNAK
chr11	62367150	62367440	Promoter	NM_001330292.2	MTA2
chr11	63257749	63258122	Promoter	NM_054108.4,NM_001146728.2,NM_001146729.2	PLAAT5
chr11	63378609	63378782	GeneBody	NM_001128203.2,NM_007069.3	PLAAT3
chr11	63532334	63532766	GeneBody	NM_001144936.2	C11orf95
chr11	63719684	63720080	GeneBody	NM_001300800.1,NM_024771.4	NAA40
chr11	63774612	63775008	GeneBody	NM_014067.4	MACROD1
chr11	63775029	63775427	GeneBody	NM_014067.4	MACROD1
chr11	63841041	63841345	GeneBody	NM_001384466.1,NM_013280.5,NM_014067.4	FLRT1,MACROD1
chr11	63846146	63846596	GeneBody	NM_001384466.1,NM_013280.5,NM_014067.4	FLRT1,MACROD1
chr11	63900905	63901093	GeneBody	NM_014067.4	MACROD1
chr11	64814899	64815312	GeneBody	NM_005468.3	NAALADL1
chr11	64815373	64815743	GeneBody	NM_005468.3	NAALADL1
chr11	65156556	65156698	GeneBody	NM_001300832.3,NM_001300833.3,NM_031904.5	FRMD8
chr11	65156831	65156972	GeneBody	NM_001300832.3,NM_001300833.3,NM_031904.5	FRMD8
chr11	65157082	65157314	GeneBody	NM_001300832.3,NM_001300833.3,NM_031904.5	FRMD8
chr11	65246135	65246383	Intergenic	NA	NA
chr11	65246410	65246639	Intergenic	NA	NA
chr11	65418007	65418307	Promoter	NR_039709.1	MIR4489
chr11	65558037	65558146	Promoter	NR_108085.1	OVOL1-AS1
chr11	65558995	65559115	Promoter	NR_108085.1	OVOL1-AS1
chr11	65783335	65783451	Intergenic	NA	NA
chr11	66311226	66311536	GeneBody	NM_207340.3,NM_001348571.2	ZDHHC24
chr11	66325046	66325292	GeneBody	NM_001104.4,NM_001258371.3	ACTN3
chr11	66636252	66636535	GeneBody	NM_022172.3,NM_001040716.2,NM_000920.4	PC
chr11	66639201	66639326	GeneBody	NM_022172.3,NM_001040716.2,NM_000920.4	PC
chr11	66727148	66727299	Promoter	NM_001040716.2,NM_000920.4	PC
chr11	66773941	66774167	Intergenic	NA	NA
chr11	66796768	66796865	GeneBody	NM_001318775.2,NM_177963.4,NM_001177880.2,NM_001318773.2	SYT12
chr11	67143061	67143173	Promoter	NM_001166212.2	CLCF1
chr11	67622242	67622395	GeneBody	ENPP7P7	ENPP7P7
chr11	67622520	67622703	GeneBody	ENPP7P7	ENPP7P7
chr11	67758657	67759084	GeneBody	NM_030930.4	UNC93B1
chr11	67896409	67896584	Intergenic	NA	NA
chr11	67982291	67982734	Promoter	NM_016028.4,NM_001369424.1,NM_001369427.1,NM_001363566.2,NM_001300909.2,NM_001369425.1,NM_001369426.1,NM_001369433.1,NM_001369431.1,NM_017635.5,NM_001369429.1,NM_001300907.1,NM_001369428.1,NM_001369432.1,NM_001300908.2,NM_001369430.1,NR_161380.1,NR_161378.1,NR_161379.1	KMT5B
chr11	68403390	68403416	Intergenic	NA	NA
chr11	68403529	68403825	Intergenic	NA	NA
chr11	68768558	68768610	Intergenic	NA	NA
chr11	68938305	68938750	Promoter	NR_104161.1	LOC338694
chr11	69084570	69084696	Intergenic	NA	NA
chr11	69830386	69830803	Promoter	NM_001378092.1_2	ANO1
chr11	69830962	69831331	Promoter	NM_001378092.1_2	ANO1
chr11	69834269	69834517	GeneBody	NM_001378092.1_2	ANO1
chr11	69865881	69866181	GeneBody	NM_001378092.1_2	ANO1
chr11	69876247	69876477	GeneBody	NM_001378092.1_2	ANO1
chr11	69876789	69877046	GeneBody	NM_001378092.1_2	ANO1
chr11	70086554	70086889	Intergenic	NA	NA
chr11	70094901	70095059	Intergenic	NA	NA
chr11	70508328	70508658	Promoter	NM_133266.5_2,NR_110766.2_2	SHANK2
chr11	70517286	70517516	GeneBody	NM_001379226.1_2,NM_012309.5_2	SHANK2
chr11	70981261	70981545	Intergenic	NA	NA
chr11	70981728	70981801	Intergenic	NA	NA
chr11	71050498	71050560	Intergenic	NA	NA
chr11	71421882	71422008	Intergenic	NA	NA
chr11	71524056	71524150	Promoter	NR_073387.1,NR_073388.1,NR_073386.1	ALG1L9P
chr11	72393660	72393770	Intergenic	NA	NA
chr11	73022485	73022821	GeneBody	NM_014786.4	ARHGEF17
chr11	73055266	73055753	GeneBody	NM_014786.4	ARHGEF17
chr11	73070351	73070653	GeneBody	NM_014786.4	ARHGEF17
chr11	73657611	73657870	Intergenic	NA	NA
chr11	73675858	73675866	GeneBody	NM_153614.4,NM_001377263.1	DNAJB13
chr11	74126465	74126678	Intergenic	NA	NA
chr11	74216231	74216590	Intergenic	NA	NA
chr11	74295937	74296009	Intergenic	NA	NA
chr11	74881442	74881816	GeneBody	NM_001145211.3,NM_001145212.3,NM_007256.5	SLCO2B1
chr11	75058573	75058669	GeneBody	NM_004041.5,NM_020251.4	ARRB1
chr11	75223369	75223563	GeneBody	NM_001351168.1,NM_030792.8	GDPD5
chr11	75294887	75295328	Promoter	NR_145823.1	LOC105369391
chr11	75299330	75299599	GeneBody	NR_145823.1,NM_033063.2	MAP6,LOC105369391
chr11	75589478	75589915	GeneBody	NM_001386674.1,NM_001386673.1,NM_001386672.1,NM_003369.4,NM_001386671.1,NR_170161.1,NR_170160.1	UVRAG
chr11	76838892	76839248	Promoter	NM_001127180.2_2,NM_000260.4_2,NM_001369365.1_2	MYO7A
chr11	76863307	76863401	GeneBody	NM_001127180.2_2,NM_000260.4_2,NM_001369365.1_2	MYO7A
chr11	76891428	76891681	GeneBody	NM_001127180.2_2,NM_000260.4_2,NM_001369365.1_2	MYO7A
chr11	78884802	78884929	GeneBody	NM_001098816.3	TENM4
chr11	80528892	80529002	Intergenic	NA	NA
chr11	82731180	82731383	GeneBody	NM_001286059.2,NM_001286061.1,NM_014488.5,NM_001286060.2	RAB30
chr11	82731445	82731682	GeneBody	NM_001286059.2,NM_001286061.1,NM_014488.5,NM_001286060.2	RAB30
chr11	83435127	83435232	Promoter	NM_001377977.1	DLG2
chr11	83548513	83548716	GeneBody	NM_001377975.1,NM_001142699.3,NM_001377972.1,NM_001377974.1,NM_001142700.2,NM_001206769.2,NM_001377966.1,NM_001377967.1,NM_001377970.1,NM_001377971.1,NM_001377973.1,NM_001351276.2,NM_001364.3,NM_001377968.1,NM_001300983.1,NM_001351275.2,NM_001351274.2,NR_165353.1	DLG2
chr11	85957675	85957862	Promoter	NM_001330334.2,NM_003797.5,NM_001308007.2	EED
chr11	86665287	86665745	Promoter	NR_038905.1,NM_012193.4	FZD4-DT,FZD4
chr11	88428895	88429124	GeneBody	NM_000842.5,NM_001143831.3,NM_001384268.1	GRM5
chr11	88576544	88576690	GeneBody	NM_000842.5,NM_001143831.3,NM_001384268.1	GRM5
chr11	92361096	92361300	GeneBody	NM_001008781.3,NM_001367949.2	FAT3
chr11	93271194	93271404	GeneBody	NM_020179.3	SMCO4
chr11	94026724	94027053	Intergenic	NA	NA
chr11	94245136	94245465	Promoter	NM_001190462.2	C11orf97
chr11	94405927	94406259	GeneBody	NR_135096.1,NR_135094.1,NR_135093.1	LOC105369438
chr11	94886600	94886758	GeneBody	NR_110303.1	LOC101929295
chr11	95179115	95179229	Intergenic	NA	NA
chr11	95323249	95323439	Intergenic	NA	NA
chr11	95358730	95358971	Intergenic	NA	NA
chr11	95461018	95461094	Intergenic	NA	NA
chr11	96011239	96011492	GeneBody	NM_032427.4	MAML2
chr11	97864991	97865114	Intergenic	NA	NA
chr11	98594209	98594331	Intergenic	NA	NA
chr11	98630092	98630338	Intergenic	NA	NA
chr11	98773747	98773845	Intergenic	NA	NA
chr11	99333326	99333402	GeneBody	NM_001243271.2,NM_001243270.2,NM_014361.4	CNTN5
chr11	100575028	100575173	GeneBody	NM_152432.4,NM_001367945.1	ARHGAP42
chr11	102499012	102499323	Intergenic	NA	NA
chr11	103970984	103971110	GeneBody	NM_025208.5,NM_033135.4	PDGFD
chr11	104836252	104836401	GeneBody	NM_033306.3,NM_001225.4	CASP4
chr11	104868038	104868252	GeneBody	NM_001136112.3,NM_004347.5,NM_001136109.3,NM_001136110.3,NR_024239.3,NR_036562.3	CASP5
chr11	104948662	104948694	Intergenic	NA	NA
chr11	104950485	104950532	Intergenic	NA	NA
chr11	110296716	110296912	Intergenic	NA	NA
chr11	110378672	110378807	Intergenic	NA	NA
chr11	110396298	110396466	Intergenic	NA	NA
chr11	110780157	110780295	Intergenic	NA	NA
chr11	111047323	111047465	Intergenic	NA	NA
chr11	111181462	111181575	Intergenic	NA	NA
chr11	111194765	111194949	Intergenic	NA	NA
chr11	111297478	111297640	Intergenic	NA	NA
chr11	111325985	111326260	Intergenic	NA	NA
chr11	111369998	111370066	GeneBody	NM_001367976.1,NM_001367975.1,NM_001367974.1,NM_017589.4	BTG4
chr11	112136390	112136523	Intergenic	NA	NA
chr11	112193365	112193517	GeneBody	NR_126004.1	LINC02762
chr11	113004934	113005042	GeneBody	NM_001386291.1_2,NM_001242608.2_2,NM_001076682.4_2,NM_001386289.1_2,NM_001386292.1_2,NM_000615.7_2,NM_001386290.1_2,NM_181351.5_2,NM_001242607.2_2	NCAM1
chr11	113069739	113069948	GeneBody	NM_001386291.1_2,NM_001242608.2_2,NM_001076682.4_2,NM_001386289.1_2,NM_001386292.1_2,NM_000615.7_2,NM_001386290.1_2,NM_181351.5_2,NM_001242607.2_2	NCAM1
chr11	113076265	113076363	GeneBody	NM_001386291.1_2,NM_001242608.2_2,NM_001076682.4_2,NM_001386289.1_2,NM_001386292.1_2,NM_000615.7_2,NM_001386290.1_2,NM_181351.5_2,NM_001242607.2_2	NCAM1
chr11	113186682	113186774	Promoter	NM_001352037.2_2,NM_001378063.1_2,NM_017868.4_2,NM_001318533.2_2,NM_001378065.1_2,NM_001378064.1_2,NR_165392.1_2,NR_165393.1_2,NR_147891.2_2	TTC12
chr11	113399373	113399477	Intergenic	NA	NA
chr11	113942890	113943164	GeneBody	NM_001354752.1,NM_001018011.3,NM_001354751.2,NM_006006.6,NM_001354750.2	ZBTB16
chr11	113979383	113979562	GeneBody	NM_001354752.1,NM_001018011.3,NM_001354751.2,NM_006006.6,NM_001354750.2	ZBTB16
chr11	114010310	114010347	GeneBody	NM_001354752.1,NM_001018011.3,NM_001354751.2,NM_006006.6,NM_001354750.2	ZBTB16
chr11	114014581	114014824	GeneBody	NM_001354752.1,NM_001018011.3,NM_001354751.2,NM_006006.6,NM_001354750.2	ZBTB16
chr11	114065884	114065966	GeneBody	NM_001354752.1,NM_001018011.3,NM_001354751.2,NM_006006.6,NM_001354750.2	ZBTB16
chr11	114128316	114128803	Promoter	NM_001372047.1	NNMT
chr11	114166340	114166445	Promoter	NM_006169.3,NM_001372045.1,NM_001372046.1	NNMT
chr11	114857960	114858089	Intergenic	NA	NA
chr11	115809881	115809954	Intergenic	NA	NA
chr11	115942178	115942460	Intergenic	NA	NA
chr11	115984945	115985000	Intergenic	NA	NA
chr11	116979723	116979904	Intergenic	NA	NA
chr11	117045865	117045965	GeneBody	NM_001184748.2,NM_001184747.2,NM_001184746.2,NR_110268.2,NR_110269.2	PAFAH1B2
chr11	117170768	117171076	GeneBody	NM_012104.4,NM_138972.3,NM_138971.3,NM_138973.3	BACE1
chr11	117171622	117171773	GeneBody	NM_012104.4,NM_138972.3,NM_138971.3,NM_138973.3	BACE1
chr11	117549691	117549884	GeneBody	NM_001367905.1,NM_001367904.1,NM_020693.4	DSCAML1
chr11	117737555	117737715	GeneBody	NM_001164836.3,NM_001164837.3,NM_001164832.3,NM_022003.4,NM_001164831.3,NM_001204268.3,NM_001243598.4	FXYD6,FXYD6-FXYD2
chr11	117748091	117748235	Promoter	NM_001164836.3,NM_001164837.3,NM_001164832.3,NM_022003.4,NM_001164831.3,NM_001204268.3,NM_001243598.4	FXYD6,FXYD6-FXYD2
chr11	117748422	117748511	Promoter	NM_001164836.3,NM_001164837.3,NM_001164832.3,NM_022003.4,NM_001164831.3,NM_001204268.3,NM_001243598.4	FXYD6,FXYD6-FXYD2
chr11	117961258	117961470	GeneBody	NM_001173552.2,NM_001290096.2,NM_001173551.2,NM_001290094.2,NM_001083947.2,NM_019894.4,NR_110734.2	TMPRSS4
chr11	117963874	117963929	GeneBody	NM_001173552.2,NM_001290096.2,NM_001173551.2,NM_001290094.2,NM_001083947.2,NM_019894.4,NR_110734.2	TMPRSS4
chr11	118046928	118047310	Promoter	NM_004588.5	SCN2B
chr11	118480120	118480575	GeneBody	NM_001144759.3_2,NM_001144758.3_2,NM_015157.4_2	PHLDB1
chr11	118480597	118481063	GeneBody	NM_001144759.3_2,NM_001144758.3_2,NM_015157.4_2	PHLDB1
chr11	118549727	118550059	Promoter	NM_007180.3_2,NM_001301065.2_2	TREH
chr11	118577030	118577154	Intergenic	NA	NA
chr11	118590804	118591139	Intergenic	NA	NA
chr11	118591202	118591538	Intergenic	NA	NA
chr11	118591647	118591920	Intergenic	NA	NA
chr11	118592290	118592394	Intergenic	NA	NA
chr11	118895924	118896080	GeneBody	NM_001164280.2_2,NM_001164277.2_2,NM_001164278.2_2,NM_001467.6_2,NM_001164279.2_2	SLC37A4
chr11	119008255	119008352	Intergenic	NA	NA
chr11	119613162	119613568	Intergenic	NA	NA
chr11	119617056	119617167	Intergenic	NA	NA
chr11	119692090	119692349	Promoter	LOC390255	LOC390255
chr11	119725337	119725536	Intergenic	NA	NA
chr11	119758775	119758917	Intergenic	NA	NA
chr11	119865141	119865508	Intergenic	NA	NA
chr11	119875784	119876032	Intergenic	NA	NA
chr11	119902520	119902656	Intergenic	NA	NA
chr11	119928414	119928731	Intergenic	NA	NA
chr11	120000334	120000610	Promoter	NM_001330382.2	TRIM29
chr11	120003951	120004110	GeneBody	NM_012101.4	TRIM29
chr11	120004365	120004480	GeneBody	NM_012101.4	TRIM29
chr11	120004921	120005123	GeneBody	NM_012101.4	TRIM29
chr11	120005262	120005360	GeneBody	NM_012101.4	TRIM29
chr11	120005610	120005777	GeneBody	NM_012101.4	TRIM29
chr11	120005956	120006169	GeneBody	NM_012101.4	TRIM29
chr11	120007174	120007354	Promoter	NM_012101.4	TRIM29
chr11	120007846	120008219	Promoter	NM_012101.4	TRIM29
chr11	120046358	120046539	Intergenic	NA	NA
chr11	120209378	120209650	GeneBody	NM_001198665.2,NM_015313.3	ARHGEF12
chr11	120436096	120436396	Promoter	NM_001282473.3,NM_001282470.3	GRIK4
chr11	120799942	120800184	GeneBody	NM_001282473.3,NM_001282470.3,NM_014619.5	GRIK4
chr11	120845061	120845501	GeneBody	NM_001282470.3,NM_014619.5	GRIK4
chr11	120968628	120968689	GeneBody	NM_001378761.1	TBCEL-TECTA
chr11	121035926	121036154	GeneBody	NM_005422.4,NM_001378761.1	TECTA,TBCEL-TECTA
chr11	121541850	121541944	Intergenic	NA	NA
chr11	121542049	121542444	Intergenic	NA	NA
chr11	121542550	121542653	Intergenic	NA	NA
chr11	121543387	121543670	Intergenic	NA	NA
chr11	121544260	121544422	Intergenic	NA	NA
chr11	121592709	121592880	Intergenic	NA	NA
chr11	121594073	121594459	Intergenic	NA	NA
chr11	121965744	121965906	GeneBody	NR_137176.1,NR_137177.1,NR_137190.1,NR_137191.1,NR_137189.1,NR_137175.1,NR_137196.1,NR_137195.1,NR_137194.1,NR_137188.1,NR_137186.1,NR_137187.1,NR_137178.1,NR_137183.1,NR_137185.1,NR_137184.1,NR_024430.2,NR_137182.1,NR_137181.1,NR_137180.1,NR_137193.1,NR_137192.1,NR_137179.1	MIR100HG
chr11	121970180	121970284	Promoter	NR_029671.1,NR_137176.1,NR_137177.1,NR_137178.1	MIR125B1,MIR100HG
chr11	122029842	122030075	GeneBody	NR_137183.1,NR_137185.1,NR_137184.1,NR_024430.2,NR_137182.1,NR_137181.1,NR_137180.1,NR_137193.1,NR_137192.1,NR_137179.1	MIR100HG
chr11	122030278	122030405	GeneBody	NR_137183.1,NR_137185.1,NR_137184.1,NR_024430.2,NR_137182.1,NR_137181.1,NR_137180.1,NR_137193.1,NR_137192.1,NR_137179.1	MIR100HG
chr11	122072921	122073084	Promoter	NR_024430.2,NR_137182.1,NR_137181.1	MIR100HG
chr11	122073429	122073554	Promoter	NR_024430.2,NR_137182.1,NR_137181.1	MIR100HG
chr11	122293463	122293632	Promoter	NR_137179.1	MIR100HG
chr11	122910718	122911138	Intergenic	NA	NA
chr11	123008364	123008825	GeneBody	NM_024769.5	CLMP
chr11	123029922	123030102	GeneBody	NM_024769.5	CLMP
chr11	123066602	123067068	Promoter	NM_024769.5	CLMP
chr11	123134840	123135010	Intergenic	NA	NA
chr11	123257923	123258055	GeneBody	NM_001367418.2,NM_001367419.2,NM_001367420.2,NM_001367421.2	GRAMD1B
chr11	123331123	123331227	GeneBody	NM_001387030.1,NM_001387034.1,NM_001387026.1,NM_001387025.1,NM_001387024.1,NM_001367418.2,NM_001367419.2,NM_001367420.2,NM_001367421.2	GRAMD1B
chr11	125251734	125251800	GeneBody	NM_001382337.1,NM_001382330.1,NM_001382340.1,NM_001382335.1,NM_001382327.1,NM_001382326.1,NR_168077.1,NR_168084.1,NR_168081.1,NR_168080.1,NM_001382338.1,NM_001382329.1,NM_001382325.1,NM_001382336.1,NM_001382332.1,NM_001382334.1,NM_001382341.1,NM_001382339.1,NM_001382323.2,NM_001382324.1,NM_001382331.1,NM_001382328.1,NM_001382333.1,NR_168076.1,NR_168079.1,NR_168083.1,NR_168078.1,NR_168082.1	PKNOX2
chr11	125282086	125282234	GeneBody	NM_001382337.1,NM_001382330.1,NM_001382340.1,NM_001382335.1,NM_001382327.1,NM_001382326.1,NR_168077.1,NR_168084.1,NR_168081.1,NR_168080.1,NM_001382338.1,NM_001382329.1,NM_001382325.1,NM_001382336.1,NM_001382332.1,NM_001382334.1,NM_001382341.1,NM_001382339.1,NM_001382323.2,NM_001382324.1,NM_001382331.1,NM_001382328.1,NM_001382333.1,NR_168076.1,NR_168079.1,NR_168083.1,NR_168078.1,NR_168082.1	PKNOX2
chr11	125295407	125295852	GeneBody	NM_001382337.1,NM_001382330.1,NM_001382340.1,NM_001382335.1,NM_001382327.1,NM_001382326.1,NR_168077.1,NR_168084.1,NR_168081.1,NR_168080.1,NM_001382338.1,NM_001382329.1,NM_001382325.1,NM_001382336.1,NM_001382332.1,NM_001382334.1,NM_001382341.1,NM_001382339.1,NM_001382323.2,NM_001382324.1,NM_001382331.1,NM_001382328.1,NM_001382333.1,NR_168076.1,NR_168079.1,NR_168083.1,NR_168078.1,NR_168082.1	PKNOX2
chr11	125304443	125304627	Intergenic	NA	NA
chr11	125820888	125821194	GeneBody	NM_001365077.1	VSIG10L2
chr11	125865369	125865417	GeneBody	NM_001378964.1,NM_001243597.2,NM_016952.5	CDON
chr11	126016594	126016813	Intergenic	NA	NA
chr11	126143241	126143543	GeneBody	NM_017547.4,NR_037647.2,NR_037648.2	FOXRED1
chr11	126404172	126404404	GeneBody	NM_001161707.1,NM_001301097.1,NM_032531.4	KIRREL3
chr11	126474603	126474711	GeneBody	NM_001161707.1,NM_001301097.1,NM_032531.4	KIRREL3
chr11	126478376	126478473	GeneBody	NM_001161707.1,NM_001301097.1,NM_032531.4	KIRREL3
chr11	126516557	126516664	GeneBody	NM_001161707.1,NM_001301097.1,NM_032531.4	KIRREL3
chr11	127642183	127642224	Intergenic	NA	NA
chr11	127986502	127986594	Intergenic	NA	NA
chr11	128349967	128350337	GeneBody	NM_005238.4,NM_001330451.2,NM_001162422.2,NM_001143820.2	ETS1
chr11	128352513	128352920	GeneBody	NM_005238.4,NM_001330451.2,NM_001162422.2,NM_001143820.2	ETS1
chr11	128369596	128370040	GeneBody	NM_005238.4,NM_001330451.2,NM_001162422.2,NM_001143820.2	ETS1
chr11	128377545	128377696	GeneBody	NM_005238.4,NM_001330451.2,NM_001162422.2,NM_001143820.2	ETS1
chr11	128377949	128378103	GeneBody	NM_005238.4,NM_001330451.2,NM_001162422.2,NM_001143820.2	ETS1
chr11	128455629	128455834	Promoter	NM_001143820.2	ETS1
chr11	128455941	128456028	Promoter	NM_001143820.2	ETS1
chr11	128757554	128757885	Intergenic	NA	NA
chr11	128758005	128758350	Intergenic	NA	NA
chr11	129085838	129086139	GeneBody	NM_001378025.1	ARHGAP32
chr11	129443254	129443513	Intergenic	NA	NA
chr11	129506367	129506578	Intergenic	NA	NA
chr11	129843869	129843967	GeneBody	NM_020228.3,NM_001367893.1,NM_199437.2,NM_001367890.1,NM_001367894.1,NM_001367892.1,NM_001367891.1	PRDM10
chr11	130090306	130090675	Intergenic	NA	NA
chr11	130345422	130345547	GeneBody	NM_139055.4	ADAMTS15
chr11	131212415	131212506	Intergenic	NA	NA
chr11	131243726	131243945	GeneBody	NM_001386969.1,NM_001048209.2,NM_001352005.2,NM_001352003.2,NM_001386968.1,NM_001352001.2,NM_001386967.1,NM_001352007.2,NM_001352006.2,NR_170348.1,NR_170350.1,NR_170349.1,NR_170366.1,NR_170357.1,NR_170355.1,NR_170347.1,NR_147848.2,NR_170354.1,NR_170346.1,NR_170351.1,NR_170352.1	NTM
chr11	131542157	131542423	GeneBody	NM_001386969.1,NM_001048209.2,NM_001352005.2,NM_001352003.2,NM_001386968.1,NM_001352001.2,NM_001386967.1,NM_001352007.2,NM_001352006.2,NR_170358.1,NR_170348.1,NR_170350.1,NR_170349.1,NR_170366.1,NR_170357.1,NR_170355.1,NR_170347.1,NR_147848.2,NR_170354.1,NR_170346.1,NR_170351.1,NR_170352.1	NTM
chr11	131982422	131982566	GeneBody	NM_001144059.3,NM_016522.3,NM_001144058.2,NM_001352004.2,NM_001352002.2,NM_001352008.2,NM_001386966.1,NM_001352009.2,NM_001386964.1,NM_001386965.1,NM_001386969.1,NM_001048209.2,NM_001352005.2,NM_001352003.2,NM_001386968.1,NM_001352001.2,NM_001386967.1,NM_001352007.2,NM_001352006.2,NR_147854.2,NR_147852.2,NR_170361.1,NR_147853.2,NR_147851.2,NR_170360.1,NR_147849.2,NR_147850.2,NR_170359.1,NR_170358…	NTM
chr11	134020595	134020945	Promoter	NR_145790.1	SNORD153
chr11	134371950	134372234	GeneBody	NR_033852.1	B3GAT1-DT
chr11	134848747	134849187	Intergenic	NA	NA
chr12	1643013	1643368	Promoter	NR_160736.1	LOC107984507
chr12	1655540	1655754	Intergenic	NA	NA
chr12	1721421	1721803	Intergenic	NA	NA
chr12	1725752	1726160	Promoter	NM_030775.2	WNT5B
chr12	1740061	1740179	Promoter	NM_032642.3	WNT5B
chr12	2205316	2205350	GeneBody	NM_001129844.2,NM_001129846.2,NM_001129838.2,NM_001129843.2,NM_001129830.3,NM_001129835.2,NM_001129841.2,NM_001129836.2,NM_001129839.2,NM_001129837.2,NM_000719.7,NM_001129834.2,NM_001129829.2,NM_001129842.2,NM_001129833.2,NM_001129831.2,NM_001129832.2,NM_001129827.2,NM_199460.4,NM_001129840.2,NM_001167625.2,NM_001167623.2,NM_001167624.3	CACNA1C
chr12	2208091	2208426	GeneBody	NM_001129844.2,NM_001129846.2,NM_001129838.2,NM_001129843.2,NM_001129830.3,NM_001129835.2,NM_001129841.2,NM_001129836.2,NM_001129839.2,NM_001129837.2,NM_000719.7,NM_001129834.2,NM_001129829.2,NM_001129842.2,NM_001129833.2,NM_001129831.2,NM_001129832.2,NM_001129827.2,NM_199460.4,NM_001129840.2,NM_001167625.2,NM_001167623.2,NM_001167624.3	CACNA1C
chr12	2222721	2223081	GeneBody	NM_001129844.2,NM_001129846.2,NM_001129838.2,NM_001129843.2,NM_001129830.3,NM_001129835.2,NM_001129841.2,NM_001129836.2,NM_001129839.2,NM_001129837.2,NM_000719.7,NM_001129834.2,NM_001129829.2,NM_001129842.2,NM_001129833.2,NM_001129831.2,NM_001129832.2,NM_001129827.2,NM_199460.4,NM_001129840.2,NM_001167625.2,NM_001167623.2,NM_001167624.3	CACNA1C
chr12	2307087	2307377	GeneBody	NM_001129844.2,NM_001129846.2,NM_001129838.2,NM_001129843.2,NM_001129830.3,NM_001129835.2,NM_001129841.2,NM_001129836.2,NM_001129839.2,NM_001129837.2,NM_000719.7,NM_001129834.2,NM_001129829.2,NM_001129842.2,NM_001129833.2,NM_001129831.2,NM_001129832.2,NM_001129827.2,NM_199460.4,NM_001129840.2,NM_001167625.2,NM_001167623.2,NM_001167624.3	CACNA1C
chr12	2467346	2467409	GeneBody	NM_001129844.2,NM_001129846.2,NM_001129838.2,NM_001129843.2,NM_001129830.3,NM_001129835.2,NM_001129841.2,NM_001129836.2,NM_001129839.2,NM_001129837.2,NM_000719.7,NM_001129834.2,NM_001129829.2,NM_001129842.2,NM_001129833.2,NM_001129831.2,NM_001129832.2,NM_001129827.2,NM_199460.4,NM_001129840.2,NM_001167625.2,NM_001167623.2,NM_001167624.3	CACNA1C
chr12	2467695	2467888	GeneBody	NM_001129844.2,NM_001129846.2,NM_001129838.2,NM_001129843.2,NM_001129830.3,NM_001129835.2,NM_001129841.2,NM_001129836.2,NM_001129839.2,NM_001129837.2,NM_000719.7,NM_001129834.2,NM_001129829.2,NM_001129842.2,NM_001129833.2,NM_001129831.2,NM_001129832.2,NM_001129827.2,NM_199460.4,NM_001129840.2,NM_001167625.2,NM_001167623.2,NM_001167624.3	CACNA1C
chr12	2473913	2474189	GeneBody	NM_001129844.2,NM_001129846.2,NM_001129838.2,NM_001129843.2,NM_001129830.3,NM_001129835.2,NM_001129841.2,NM_001129836.2,NM_001129839.2,NM_001129837.2,NM_000719.7,NM_001129834.2,NM_001129829.2,NM_001129842.2,NM_001129833.2,NM_001129831.2,NM_001129832.2,NM_001129827.2,NM_199460.4,NM_001129840.2,NM_001167625.2,NM_001167623.2,NM_001167624.3	CACNA1C
chr12	2494055	2494310	GeneBody	NM_001129844.2,NM_001129846.2,NM_001129838.2,NM_001129843.2,NM_001129830.3,NM_001129835.2,NM_001129841.2,NM_001129836.2,NM_001129839.2,NM_001129837.2,NM_000719.7,NM_001129834.2,NM_001129829.2,NM_001129842.2,NM_001129833.2,NM_001129831.2,NM_001129832.2,NM_001129827.2,NM_199460.4,NM_001129840.2,NM_001167625.2,NM_001167623.2,NM_001167624.3	CACNA1C
chr12	2494430	2494511	GeneBody	NM_001129844.2,NM_001129846.2,NM_001129838.2,NM_001129843.2,NM_001129830.3,NM_001129835.2,NM_001129841.2,NM_001129836.2,NM_001129839.2,NM_001129837.2,NM_000719.7,NM_001129834.2,NM_001129829.2,NM_001129842.2,NM_001129833.2,NM_001129831.2,NM_001129832.2,NM_001129827.2,NM_199460.4,NM_001129840.2,NM_001167625.2,NM_001167623.2,NM_001167624.3	CACNA1C
chr12	2543700	2544027	GeneBody	NM_001129844.2,NM_001129846.2,NM_001129838.2,NM_001129843.2,NM_001129830.3,NM_001129835.2,NM_001129841.2,NM_001129836.2,NM_001129839.2,NM_001129837.2,NM_000719.7,NM_001129834.2,NM_001129829.2,NM_001129842.2,NM_001129833.2,NM_001129831.2,NM_001129832.2,NM_001129827.2,NM_199460.4,NM_001129840.2,NM_001167625.2,NM_001167623.2,NM_001167624.3	CACNA1C
chr12	2647136	2647195	GeneBody	NM_001129844.2,NM_001129846.2,NM_001129838.2,NM_001129843.2,NM_001129830.3,NM_001129835.2,NM_001129841.2,NM_001129836.2,NM_001129839.2,NM_001129837.2,NM_000719.7,NM_001129834.2,NM_001129829.2,NM_001129842.2,NM_001129833.2,NM_001129831.2,NM_001129832.2,NM_001129827.2,NM_199460.4,NM_001129840.2,NM_001167625.2,NM_001167623.2,NM_001167624.3	CACNA1C
chr12	3007111	3007230	GeneBody	NM_001160408.2,NM_003324.5	TULP3
chr12	3194984	3195290	GeneBody	NM_001168320.2,NM_006675.5	TSPAN9
chr12	3421024	3421189	GeneBody	NR_148995.1	LOC100128253
chr12	5119391	5119542	Intergenic	NA	NA
chr12	6483013	6483151	Promoter	NM_001270987.2,NM_001159576.2,NM_001038.6	LTBR,SCNN1A
chr12	6483496	6483872	Promoter	NM_001270987.2,NM_001159576.2,NM_001038.6	LTBR,SCNN1A
chr12	6486597	6486708	Promoter	NM_001038.6,NM_001159575.2	SCNN1A
chr12	6487051	6487112	Promoter	NM_001159575.2	SCNN1A
chr12	6559345	6559558	Promoter	NM_018009.5,NM_001351355.2,NR_147127.2,NR_147128.2,NR_147129.2,NR_147126.1,NR_015382.2	CD27-AS1,TAPBPL
chr12	6616627	6616718	GeneBody	NM_014865.4	NCAPD2
chr12	6664425	6664848	Promoter	NM_001193457.2,NM_001039670.3,NM_080730.5,NM_001330325.2,NM_001330324.2,NR_036467.2	IFFO1
chr12	6664871	6665334	Promoter	NM_001193457.2,NM_001039670.3,NM_080730.5,NM_001330325.2,NM_001330324.2,NR_036467.2	IFFO1
chr12	6735904	6736016	GeneBody	NM_001142961.1,NM_020400.6	LPAR5
chr12	6878365	6878413	GeneBody	NM_002824.6,NM_001330333.2	PTMS
chr12	8031314	8031355	GeneBody	NM_001286237.2	SLC2A14
chr12	8743666	8743815	Intergenic	NA	NA
chr12	8959790	8960173	Intergenic	NA	NA
chr12	9108728	9109034	GeneBody	NM_001329103.2,NM_001329101.2,NM_001329102.2,NR_137427.2,NR_137426.2	KLRG1
chr12	9217801	9218205	Promoter	NR_026971.1,NR_137425.1,NR_137424.1,NR_034140.1	LINC00612,A2M-AS1
chr12	9272397	9272488	Intergenic	NA	NA
chr12	9276778	9277277	Intergenic	NA	NA
chr12	9802491	9802690	Promoter	NR_046447.1,NR_046446.1,NR_046445.1,NR_002814.2,NR_046444.1	LOC374443
chr12	11918813	11919028	GeneBody	NM_001987.5	ETV6
chr12	11946932	11947385	GeneBody	NM_001987.5	ETV6
chr12	12475213	12475416	Intergenic	NA	NA
chr12	14109070	14109326	GeneBody	NM_000834.5	GRIN2B
chr12	14133128	14133560	Promoter	NM_000834.5	GRIN2B
chr12	15049455	15049652	Intergenic	NA	NA
chr12	17284576	17284896	Intergenic	NA	NA
chr12	17513379	17513476	Intergenic	NA	NA
chr12	18437036	18437184	GeneBody	NM_001288774.2,NM_004570.6,NM_001288772.2	PIK3C2G
chr12	19777461	19777675	Intergenic	NA	NA
chr12	19995501	19995606	Intergenic	NA	NA
chr12	19998271	19998417	Intergenic	NA	NA
chr12	22086714	22086897	GeneBody	NM_001377273.1,NM_005691.4,NM_020297.4,NM_001377274.1	ABCC9
chr12	22696020	22696212	Promoter	NM_001286174.3,NM_001385333.1,NM_001385331.1,NM_001286173.2,NM_001385323.1,NM_001286175.2,NM_001385328.1,NM_001286177.2,NM_001385325.1,NM_001385326.1,NM_001385322.1,NM_001385332.1,NM_001286176.2,NM_001385324.1,NM_001385327.1,NM_014802.3,NM_001385329.1,NM_001385330.1,NR_169598.1	C2CD5
chr12	22881004	22881161	Intergenic	NA	NA
chr12	23794038	23794130	GeneBody	NM_006940.6,NM_001330785.2,NM_001261415.3,NM_001261414.3,NM_152989.5	SOX5
chr12	24549389	24549552	GeneBody	NM_001261414.3,NM_152989.5	SOX5
chr12	24975025	24975123	GeneBody	NM_001178094.2,NM_001178093.2,NM_005504.7,NM_001178091.2,NM_001178092.2	BCAT1
chr12	26038325	26038430	Intergenic	NA	NA
chr12	26038600	26038851	Intergenic	NA	NA
chr12	26038923	26039198	Intergenic	NA	NA
chr12	26274287	26274367	GeneBody	NM_030762.3	BHLHE41
chr12	26349411	26349693	Promoter	NM_005086.5,NM_001135823.1	SSPN
chr12	26351134	26351440	GeneBody	NM_005086.5,NM_001135823.1	SSPN
chr12	26386620	26386856	GeneBody	NM_005086.5,NM_001135823.1	SSPN
chr12	26426872	26427030	Intergenic	NA	NA
chr12	26430810	26431038	Intergenic	NA	NA
chr12	26434313	26434512	Intergenic	NA	NA
chr12	26450384	26450601	Intergenic	NA	NA
chr12	27695715	27695792	GeneBody	NM_001198915.2,NM_001198916.2,NM_003622.4,NM_177444.3	PPFIBP1
chr12	27698691	27698845	GeneBody	NM_001198915.2,NM_001198916.2,NM_003622.4,NM_177444.3	PPFIBP1
chr12	27760646	27760733	GeneBody	NM_001198915.2,NM_001198916.2,NM_003622.4,NM_177444.3	PPFIBP1
chr12	29641813	29641865	GeneBody	NM_001353179.1	OVCH1
chr12	29894671	29894767	GeneBody	NM_001367875.2,NM_001193451.2,NM_175861.3	TMTC1
chr12	31431423	31431659	Intergenic	NA	NA
chr12	41184759	41184893	GeneBody	NM_001256063.2,NM_001843.4	CNTN1
chr12	44251719	44251785	GeneBody	NM_001286213.2,NM_001286212.2,NM_001286211.2,NM_032256.3	TMEM117
chr12	44278775	44279052	GeneBody	NM_001286213.2,NM_001286212.2,NM_001286211.2,NM_032256.3	TMEM117
chr12	45608610	45608739	Promoter	NM_001025356.3,NM_001204803.2,NM_001142679.2,NR_037144.1	ANO6,PLEKHA8P1
chr12	46646107	46646233	GeneBody	NM_001278389.2,NM_001278390.1,NM_001278387.2,NM_030674.4,NM_001278388.2,NM_001077484.2	SLC38A1
chr12	47096944	47097067	Intergenic	NA	NA
chr12	47471653	47472051	Promoter	NM_001281429.2,NM_138371.3,NM_001143668.1,NM_001370299.1,NM_181847.4	AMIGO2,PCED1B
chr12	47472177	47472512	Promoter	NM_001281429.2,NM_138371.3,NM_001143668.1,NM_001370299.1,NM_181847.4	AMIGO2,PCED1B
chr12	47579293	47579368	GeneBody	NM_001281429.2,NM_138371.3	PCED1B
chr12	47785436	47785868	Intergenic	NA	NA
chr12	47811204	47811391	GeneBody	NR_149087.1	LINC02156
chr12	47996894	47997221	Intergenic	NA	NA
chr12	48131067	48131463	GeneBody	NM_001098532.2,NM_006105.5,NM_001098531.4	RAPGEF3
chr12	48336118	48336542	Intergenic	NA	NA
chr12	48589083	48589263	Intergenic	NA	NA
chr12	49526748	49527074	Promoter	NM_006082.3	TUBA1B
chr12	50599426	50599695	GeneBody	NM_001113547.2,NM_001113546.2,NM_016357.5	LIMA1
chr12	50615713	50615881	Promoter	NM_001113547.2	LIMA1
chr12	50615991	50616261	Promoter	NM_001113547.2	LIMA1
chr12	51221867	51221913	Intergenic	NA	NA
chr12	52056564	52056869	GeneBody	NM_001369788.1,NM_001330260.2,NM_001177984.3,NM_014191.4	SCN8A
chr12	52116012	52116194	GeneBody	NM_001369788.1,NM_001330260.2,NM_001177984.3,NM_014191.4	SCN8A
chr12	52242881	52243182	Promoter	NR_135803.1,NM_001384996.1,NM_001384995.1	FIGNL2-DT,FIGNL2
chr12	52258423	52258836	Intergenic	NA	NA
chr12	52401324	52401694	Promoter	NM_181711.4,NR_146770.1	TAMALIN-AS1,TAMALIN
chr12	52600022	52600217	GeneBody	NR_164127.1,NR_164134.1,NR_164129.1,NR_164130.1,NR_164132.1,NR_164131.1,NR_164133.1	LINC02874
chr12	52600589	52600712	GeneBody	NR_164127.1,NR_164134.1,NR_164129.1,NR_164130.1,NR_164132.1,NR_164131.1,NR_164133.1	LINC02874
chr12	52910141	52910637	GeneBody	NM_000424.4	KRT5
chr12	52911305	52911557	GeneBody	NM_000424.4	KRT5
chr12	52911810	52911923	GeneBody	NM_000424.4	KRT5
chr12	52912783	52913028	Promoter	NM_000424.4	KRT5
chr12	53200844	53201196	GeneBody	NM_002272.4	KRT4
chr12	53312162	53312384	GeneBody	NM_001256282.2,NM_001256293.2,NR_045962.2	KRT8
chr12	53589837	53589954	GeneBody	NM_000889.3,NR_104181.2	ITGB7
chr12	53590346	53590698	GeneBody	NM_000889.3,NR_104181.2	ITGB7
chr12	53717741	53718165	Intergenic	NA	NA
chr12	54448581	54448962	Promoter	NM_153633.3	HOXC4
chr12	54784077	54784385	Promoter	NM_001130967.3,NM_001130968.3	ZNF385A
chr12	54812175	54812607	Promoter	NM_002205.5,NR_120488.1	LOC102724050,ITGA5
chr12	55000288	55000607	Intergenic	NA	NA
chr12	56139858	56139977	GeneBody	NM_005811.5	GDF11
chr12	56212775	56212840	Promoter	NM_014182.5,NM_033082.4,NR_026723.2,NR_026722.2	ORMDL2,SARNP
chr12	56323330	56323498	Promoter	NM_001345.5,NM_032345.3	DGKA,PYM1
chr12	57466872	57467094	GeneBody	NM_001130963.2,NM_015257.3	NEMP1
chr12	57467147	57467382	GeneBody	NM_001130963.2,NM_015257.3	NEMP1
chr12	57484572	57484708	Promoter	NM_001330305.2,NM_005967.4	NAB2
chr12	57484874	57485289	GeneBody	NM_001330305.2,NM_005967.4	NAB2
chr12	57581894	57582047	GeneBody	NM_002332.3	LRP1
chr12	58208275	58208495	Promoter	NM_006576.3	AVIL
chr12	59198043	59198260	GeneBody	NR_126341.1	LOC100506869
chr12	59478677	59479095	Intergenic	NA	NA
chr12	60072993	60073111	GeneBody	NM_001270622.2,NM_001270623.2	SLC16A7
chr12	60126927	60127273	GeneBody	NM_004731.5,NM_001270622.2,NM_001270623.2,NR_073055.2,NR_073056.2	SLC16A7
chr12	60830781	60830877	Intergenic	NA	NA
chr12	62863765	62863965	GeneBody	NM_001278471.2,NM_001278470.2,NM_015026.3,NM_001278469.3,NM_001278472.2	MON2
chr12	63024280	63024465	Intergenic	NA	NA
chr12	63191217	63191405	GeneBody	NM_020700.2	PPM1H
chr12	63270599	63270765	GeneBody	NM_020700.2	PPM1H
chr12	63292088	63292200	GeneBody	NM_020700.2	PPM1H
chr12	63358134	63358311	Promoter	RPL14P1	RPL14P1
chr12	64960676	64960779	Intergenic	NA	NA
chr12	65302956	65303115	GeneBody	NR_033988.1	LINC02389
chr12	65671663	65672104	Promoter	NM_001193461.2,NM_198080.4,NM_001031679.3,NM_001193460.2	MSRB3
chr12	66793574	66793718	GeneBody	NM_001366722.1,NM_001379346.1,NM_021150.4,NM_001178074.2,NM_001379345.1,NM_001366724.1,NM_001379347.1,NM_001366723.1,NM_001379348.1,NM_001379349.1,NM_001379351.1	GRIP1
chr12	67824553	67824640	Intergenic	NA	NA
chr12	67852026	67852233	Intergenic	NA	NA
chr12	68163824	68163940	Intergenic	NA	NA
chr12	68305191	68305333	Intergenic	NA	NA
chr12	76648905	76649017	Intergenic	NA	NA
chr12	76816337	76816409	Promoter	NM_001319655.2	OSBPL8
chr12	76999892	76999999	Intergenic	NA	NA
chr12	77260508	77260693	GeneBody	NM_001321.3,NM_001300965.2	CSRP2
chr12	77949060	77949266	Intergenic	NA	NA
chr12	80326603	80326763	GeneBody	NM_002480.3,NM_001143885.2,NM_001244990.2,NM_001244992.1	PPP1R12A
chr12	80580366	80580414	GeneBody	NM_001378609.3,NM_001378610.3,NM_001368062.3	OTOGL
chr12	81691849	81691902	GeneBody	NR_120491.1,NM_001220480.3,NM_001220479.3,NM_001282536.1,NM_001220477.2,NM_001220478.2,NM_001220476.2,NM_001220475.2,NM_001220473.3,NM_001220474.3,NM_003625.5	PPFIA2-AS1,PPFIA2
chr12	86167217	86167408	Intergenic	NA	NA
chr12	86249123	86249197	Intergenic	NA	NA
chr12	86249646	86249801	Intergenic	NA	NA
chr12	86295843	86296099	Intergenic	NA	NA
chr12	88972019	88972341	GeneBody	NM_000899.5,NM_003994.6	KITLG
chr12	88972617	88972866	Promoter	NM_000899.5,NM_003994.6	KITLG
chr12	89739590	89739746	Intergenic	NA	NA
chr12	89750031	89750159	Intergenic	NA	NA
chr12	89751201	89751284	Intergenic	NA	NA
chr12	89751398	89751615	Intergenic	NA	NA
chr12	89767028	89767448	Intergenic	NA	NA
chr12	89768481	89768752	Intergenic	NA	NA
chr12	89845922	89846099	GeneBody	NM_001199777.2,NM_172240.3,NR_037660.2,NR_037659.2	POC1B
chr12	90100883	90101112	Promoter	NR_028138.1,NM_001366522.1,NM_001366523.1,NM_001366527.1,NM_001366525.1,NM_001366521.1,NM_001366532.1	ATP2B1,ATP2B1-AS1
chr12	90371224	90371605	Intergenic	NA	NA
chr12	90522382	90522606	Intergenic	NA	NA
chr12	90985438	90985608	Intergenic	NA	NA
chr12	91236416	91236551	Intergenic	NA	NA
chr12	92666169	92666396	Intergenic	NA	NA
chr12	93454886	93455098	GeneBody	NR_040096.1	LOC643339
chr12	93521228	93521356	GeneBody	NR_040096.1	LOC643339
chr12	93770589	93770640	Promoter	NM_001301024.2,NM_001301023.2,NM_001301022.2,NM_019094.6,NM_199040.4,NR_040096.1	LOC643339,NUDT4
chr12	93996834	93996870	Intergenic	NA	NA
chr12	94467732	94467836	Intergenic	NA	NA
chr12	94468014	94468287	Intergenic	NA	NA
chr12	94981718	94982009	GeneBody	NM_001301036.2,NM_020698.4	TMCC3
chr12	95072394	95072511	Intergenic	NA	NA
chr12	95147379	95147701	Intergenic	NA	NA
chr12	96145178	96145530	GeneBody	NM_001329702.2,NM_021229.4,NM_001329700.2,NM_001329701.2	NTN4
chr12	96180766	96181215	GeneBody	NM_001329702.2,NM_021229.4,NM_001329700.2,NM_001329701.2	NTN4
chr12	96181344	96181454	GeneBody	NM_001329702.2,NM_021229.4,NM_001329700.2,NM_001329701.2	NTN4
chr12	96364770	96364869	Intergenic	NA	NA
chr12	97459141	97459183	Intergenic	NA	NA
chr12	98657171	98657302	Intergenic	NA	NA
chr12	99398690	99398873	GeneBody	NM_001352200.2,NM_001352198.2,NM_001352205.2,NM_181670.4,NM_001352195.2,NM_001204068.2,NM_001352204.2,NM_001352202.2,NM_001204069.2,NM_001352206.2,NM_001204070.2,NM_001352199.2,NM_001352203.2,NM_001352194.2,NM_001352201.2,NM_001352193.2,NM_001352192.2,NM_001352191.2,NM_001204066.2,NM_001352190.1,NM_001352189.1,NM_001204067.2,NM_001352196.2,NM_001352197.2,NM_020140.4,NM_001352188.1,NM_001352187.1,…	ANKS1B
chr12	100579769	100579967	Intergenic	NA	NA
chr12	101643222	101643393	Intergenic	NA	NA
chr12	101647913	101648071	Intergenic	NA	NA
chr12	101648850	101648975	Intergenic	NA	NA
chr12	101650471	101650534	Intergenic	NA	NA
chr12	101720871	101720954	GeneBody	NM_014503.3	UTP20
chr12	102298619	102298760	GeneBody	NM_018370.3	DRAM1
chr12	104066534	104066656	GeneBody	NM_017564.10	STAB2
chr12	104233594	104233871	Promoter	NM_001031701.3	NT5DC3
chr12	104509012	104509337	Intergenic	NA	NA
chr12	105476996	105477174	Promoter	NM_001034173.4,NR_027752.2	ALDH1L2
chr12	105593077	105593286	GeneBody	NM_001251905.2,NM_001251904.2,NM_018171.5	APPL2
chr12	106142979	106143178	Intergenic	NA	NA
chr12	106246313	106246477	Intergenic	NA	NA
chr12	107292508	107292693	Intergenic	NA	NA
chr12	107449825	107450012	GeneBody	NM_004075.5	CRY1
chr12	109037690	109037890	Intergenic	NA	NA
chr12	110327735	110327773	Intergenic	NA	NA
chr12	110808593	110808929	Intergenic	NA	NA
chr12	111051037	111051408	Promoter	NM_001319682.3,NM_001319680.2,NM_001082537.3,NM_001082538.3,NM_024549.6,NM_001319681.2,NM_001173976.2,NM_001173975.3,NR_135088.2	TCTN1
chr12	111372623	111372754	Promoter	NR_036513.1	LINC01405
chr12	112150379	112150601	GeneBody	NM_025247.6,NM_001136538.2	ACAD10
chr12	112561218	112561425	Intergenic	NA	NA
chr12	112614540	112614700	GeneBody	NM_001109662.4,NM_001388303.1	HECTD4
chr12	112622973	112623407	GeneBody	NM_001109662.4,NM_001388303.1	HECTD4
chr12	113002470	113002548	Intergenic	NA	NA
chr12	113053366	113053490	GeneBody	NM_001347952.2	RPH3A
chr12	113285729	113285984	GeneBody	NM_001347954.2,NM_001347955.2,NM_014954.4,NM_001143854.2,NM_001347953.1,NM_001347952.2,NR_145126.2,NR_145127.2	RPH3A
chr12	113541518	113541903	GeneBody	NM_001301202.1,NM_001193521.2,NM_004658.2,NM_001193520.1	RASAL1
chr12	113709706	113709915	GeneBody	NM_001351347.1,NM_001301214.2,NM_017901.6,NM_001351346.2,NM_001143819.3	TPCN1
chr12	114327725	114328083	GeneBody	NM_016196.4,NM_001146698.2,NM_001146699.2	RBM19
chr12	114328223	114328423	GeneBody	NM_016196.4,NM_001146698.2,NM_001146699.2	RBM19
chr12	115107312	115107699	Intergenic	NA	NA
chr12	115107802	115107953	Intergenic	NA	NA
chr12	115109153	115109640	GeneBody	NM_016569.4,NM_005996.4	TBX3
chr12	115117335	115117608	GeneBody	NM_016569.4,NM_005996.4	TBX3
chr12	115118470	115118553	GeneBody	NM_016569.4,NM_005996.4	TBX3
chr12	115118736	115118995	GeneBody	NM_016569.4,NM_005996.4	TBX3
chr12	115200215	115200522	Intergenic	NA	NA
chr12	115583540	115583618	Intergenic	NA	NA
chr12	115583745	115583847	Intergenic	NA	NA
chr12	115938793	115938928	Intergenic	NA	NA
chr12	116095018	116095183	Intergenic	NA	NA
chr12	116196057	116196212	Intergenic	NA	NA
chr12	116196844	116196874	Intergenic	NA	NA
chr12	116808632	116808987	Intergenic	NA	NA
chr12	117080062	117080181	Intergenic	NA	NA
chr12	117295975	117296249	GeneBody	NM_003806.4,NR_073189.3	HRK
chr12	117296344	117296575	GeneBody	NM_003806.4,NR_073189.3	HRK
chr12	117297309	117297415	GeneBody	NM_003806.4,NR_073189.3	HRK
chr12	117297685	117298060	GeneBody	NM_003806.4,NR_073189.3	HRK
chr12	117448787	117448901	GeneBody	NM_012174.2,NM_153348.3	FBXW8
chr12	117472535	117472803	Intergenic	NA	NA
chr12	117529624	117529770	GeneBody	NM_017899.4,NM_001168325.2,NR_031766.3	TESC
chr12	117532257	117532514	GeneBody	NM_017899.4,NM_001168325.2,NR_031766.3	TESC
chr12	117534588	117534835	GeneBody	NM_017899.4,NM_001168325.2,NR_031766.3	TESC
chr12	117534879	117535096	GeneBody	NM_017899.4,NM_001168325.2,NR_031766.3	TESC
chr12	117535241	117535676	Promoter	NR_120464.1,NM_017899.4,NM_001168325.2,NR_031766.3	TESC-AS1,TESC
chr12	117581414	117581582	GeneBody	NM_033624.3,NM_015002.3	FBXO21
chr12	117825639	117825700	Intergenic	NA	NA
chr12	118265967	118266050	GeneBody	NM_173598.6	KSR2
chr12	118514971	118515134	GeneBody	NM_019086.6	VSIG10
chr12	118627527	118627942	Promoter	NM_001346494.2,NM_001346496.2,NM_001346495.2,NM_001346497.2	TAOK3
chr12	118628071	118628448	Promoter	NM_001346494.2,NM_001346496.2,NM_001346495.2,NM_001346497.2	TAOK3
chr12	120804797	120804957	GeneBody	NM_002442.4	MSI1
chr12	120835586	120835855	Intergenic	NA	NA
chr12	121621845	121622324	GeneBody	NM_002562.6,NR_033953.2,NR_033956.2,NR_033952.2,NR_033954.2,NR_033955.2,NR_033951.2,NR_033950.2,NR_033949.2,NR_033948.2	P2RX7
chr12	121622379	121622811	GeneBody	NM_002562.6,NR_033953.2,NR_033956.2,NR_033952.2,NR_033954.2,NR_033955.2,NR_033951.2,NR_033950.2,NR_033949.2,NR_033948.2	P2RX7
chr12	122296783	122297183	Promoter	NM_002150.3	HPD
chr12	122622359	122622725	GeneBody	NM_014938.6	MLXIP
chr12	122707702	122708120	GeneBody	NM_001278304.2,NM_001371333.1,NM_019887.6,NM_138930.3,NM_001278302.1,NM_001278342.1,NM_001278303.1	DIABLO
chr12	123213699	123213791	Promoter	NM_032554.4	HCAR1
chr12	123213927	123213956	Promoter	NM_032554.4	HCAR1
chr12	123469140	123469586	GeneBody	NM_001384660.1,NM_001384662.1,NM_001384668.1,NM_001384663.1,NM_001384664.1,NM_001300801.2,NM_020845.3,NM_001384661.1	PITPNM2
chr12	123859197	123859473	Intergenic	NA	NA
chr12	124016989	124017203	Promoter	NM_001319243.2,NM_178314.5	RILPL1
chr12	124101088	124101345	Promoter	NR_145743.1	SNORA9B
chr12	124247719	124248043	Promoter	NM_207437.3,NM_001372106.1	DNAH10
chr12	124392299	124392547	GeneBody	NM_207437.3,NM_001372106.1	DNAH10
chr12	124787617	124787961	GeneBody	NM_001365156.1,NM_181709.5,NM_001347902.2,NM_001204299.3	RFLNA,ZNF664-RFLNA
chr12	124942236	124942691	GeneBody	NM_006312.6,NM_001206654.2,NM_001077261.4	NCOR2
chr12	124993048	124993273	GeneBody	NM_006312.6,NM_001206654.2,NM_001077261.4	NCOR2
chr12	124993375	124993539	GeneBody	NM_006312.6,NM_001206654.2,NM_001077261.4	NCOR2
chr12	125007620	125007932	GeneBody	NM_006312.6,NM_001206654.2,NM_001077261.4	NCOR2
chr12	125007967	125008271	GeneBody	NM_006312.6,NM_001206654.2,NM_001077261.4	NCOR2
chr12	125009896	125010365	GeneBody	NM_006312.6,NM_001206654.2,NM_001077261.4	NCOR2
chr12	125062797	125063208	Intergenic	NA	NA
chr12	125076904	125077239	Intergenic	NA	NA
chr12	125148407	125148649	Intergenic	NA	NA
chr12	125160568	125160852	Intergenic	NA	NA
chr12	125166524	125166915	Intergenic	NA	NA
chr12	125185346	125185780	Intergenic	NA	NA
chr12	125271166	125271599	GeneBody	NM_001367982.1,NM_001367983.1,NM_001367981.1,NM_001367989.1,NM_005505.5,NM_001367984.1,NM_001082959.2,NM_001367986.1,NM_001367987.1,NM_001367985.1,NM_001367988.1,NR_160416.1,NR_160417.1,NR_160419.1,NR_160423.1,NR_160421.1,NR_160424.1,NR_160422.1,NR_160420.1,NR_160418.1	SCARB1
chr12	125368301	125368440	Intergenic	NA	NA
chr12	125422754	125422879	Promoter	rna-TRA-TGC4-1,rna-TRD-GTC2-10	TRD-GTC2-10,TRA-TGC4-1
chr12	125527797	125528050	Intergenic	NA	NA
chr12	125649156	125649352	Intergenic	NA	NA
chr12	126773550	126773627	Intergenic	NA	NA
chr12	127873702	127874047	Intergenic	NA	NA
chr12	127875362	127875502	Intergenic	NA	NA
chr12	127942400	127942575	Intergenic	NA	NA
chr12	129302039	129302103	GeneBody	NM_145648.4	SLC15A4
chr12	129302673	129302784	GeneBody	NM_145648.4	SLC15A4
chr12	129711836	129711891	GeneBody	NM_133448.3	TMEM132D
chr12	130554729	130555006	Promoter	NR_146538.1	LINC02419
chr12	130555025	130555292	Promoter	NR_146538.1	LINC02419
chr12	130607245	130607397	Intergenic	NA	NA
chr12	130607612	130607973	Intergenic	NA	NA
chr12	130610067	130610158	Intergenic	NA	NA
chr12	130711690	130711932	Intergenic	NA	NA
chr12	131990431	131990555	Intergenic	NA	NA
chr12	132336242	132336694	Intergenic	NA	NA
chr12	132934275	132934711	Intergenic	NA	NA
chr12	133113791	133114093	GeneBody	NM_001382743.1,NM_001382740.1,NM_001142641.2,NM_001382739.1,NM_001367871.1	FBRSL1
chr12	133127811	133128134	GeneBody	NM_001382740.1,NM_001142641.2,NM_001382739.1,NM_001367871.1	FBRSL1
chr13	19198758	19199016	Intergenic	NA	NA
chr13	19520904	19521143	GeneBody	PHF2P2	PHF2P2
chr13	19523668	19523810	GeneBody	PHF2P2	PHF2P2
chr13	19881064	19881261	Promoter	MRPL3P1	MRPL3P1
chr13	20820990	20821134	Intergenic	NA	NA
chr13	20821256	20821325	Intergenic	NA	NA
chr13	20988857	20989295	GeneBody	NM_015974.3,NM_001363647.2	CRYL1
chr13	21497486	21497557	Promoter	CNOT4P1	CNOT4P1
chr13	22200002	22200072	Intergenic	NA	NA
chr13	22242731	22243191	Intergenic	NA	NA
chr13	22476410	22476685	Intergenic	NA	NA
chr13	22512850	22512996	Intergenic	NA	NA
chr13	22804186	22804229	GeneBody	NR_103810.1	LINC00540
chr13	22810398	22810694	GeneBody	NR_103810.1	LINC00540
chr13	23318853	23319188	Intergenic	NA	NA
chr13	23319220	23319553	Intergenic	NA	NA
chr13	23516371	23516486	Intergenic	NA	NA
chr13	24200859	24200999	GeneBody	NM_018647.5,NM_001354985.2,NM_001204458.3,NM_001204459.2,NM_148957.4	TNFRSF19
chr13	24938155	24938270	Intergenic	NA	NA
chr13	25223345	25223470	Intergenic	NA	NA
chr13	26317646	26317793	GeneBody	NM_001313741.1,NM_016529.6	ATP8A2
chr13	26411251	26411463	GeneBody	NM_001313741.1,NM_016529.6	ATP8A2
chr13	26458729	26459049	GeneBody	NM_001313741.1,NM_016529.6	ATP8A2
chr13	26482568	26482727	GeneBody	NM_001313741.1,NM_016529.6	ATP8A2
chr13	26551234	26551598	GeneBody	NM_001313741.1,NM_016529.6	ATP8A2
chr13	26623013	26623151	GeneBody	NM_001007538.2	SHISA2
chr13	26653056	26653184	Intergenic	NA	NA
chr13	27579740	27579817	Intergenic	NA	NA
chr13	27859916	27860064	Intergenic	NA	NA
chr13	29806433	29806459	GeneBody	NM_001384606.1,NM_001366651.1,NM_001366650.1,NM_001033602.4,NM_001384605.1	MTUS2
chr13	30039401	30039643	GeneBody	NM_015233.6,NM_001384606.1,NM_001366651.1,NM_001366650.1,NM_001033602.4,NM_001384605.1	MTUS2
chr13	30163772	30164076	GeneBody	NM_003045.5	SLC7A1
chr13	30337329	30337497	Intergenic	NA	NA
chr13	30594311	30594498	Intergenic	NA	NA
chr13	31436886	31437341	Intergenic	NA	NA
chr13	31444285	31444493	Intergenic	NA	NA
chr13	31606889	31607332	Intergenic	NA	NA
chr13	31984684	31984791	Intergenic	NA	NA
chr13	32259067	32259272	Intergenic	NA	NA
chr13	32829268	32829395	GeneBody	NM_023037.3	FRY
chr13	32829556	32829718	GeneBody	NM_023037.3	FRY
chr13	32984005	32984337	GeneBody	NM_001353631.2,NM_001353629.2,NM_001353627.2,NM_001353628.2,NM_001353633.2,NM_001353632.2,NM_052818.3,NM_001286459.2,NM_001286461.2,NM_001353630.2,NM_001079691.2,NM_001286460.2,NM_001353634.2,NM_001353635.2,NM_001353636.2,NR_148475.2,NR_148480.2,NR_148478.2,NR_148476.2,NR_148477.2,NR_148479.2	N4BP2L1
chr13	34319909	34320050	Intergenic	NA	NA
chr13	35270289	35270467	Intergenic	NA	NA
chr13	35324359	35324463	Intergenic	NA	NA
chr13	35324582	35324772	Intergenic	NA	NA
chr13	35324874	35324976	Intergenic	NA	NA
chr13	35374683	35375004	Intergenic	NA	NA
chr13	35375017	35375348	Intergenic	NA	NA
chr13	35829508	35829794	GeneBody	NM_001379245.1,NM_015678.5,NM_001385012.1	NBEA
chr13	36100857	36100911	GeneBody	NM_001204197.3,NM_001379245.1,NM_015678.5,NM_001385012.1	NBEA
chr13	36386628	36386683	GeneBody	NM_001195415.2,NM_001195416.2,NM_004734.5,NM_001330071.2,NM_001330072.2	DCLK1
chr13	37977921	37978118	Intergenic	NA	NA
chr13	38546390	38546588	Intergenic	NA	NA
chr13	39887751	39888061	Intergenic	NA	NA
chr13	39944769	39944934	GeneBody	NM_005780.3	LHFPL6
chr13	39959637	39959697	GeneBody	NM_005780.3	LHFPL6
chr13	39979919	39980078	GeneBody	NM_005780.3	LHFPL6
chr13	40573681	40573746	Intergenic	NA	NA
chr13	40633833	40634060	Intergenic	NA	NA
chr13	40960078	40960191	GeneBody	NR_024507.2,NR_024506.1	LINC00598
chr13	41109424	41109739	Intergenic	NA	NA
chr13	41137544	41137774	GeneBody	NM_002015.4	FOXO1
chr13	41164806	41164864	GeneBody	NM_002015.4	FOXO1
chr13	41977209	41977346	Intergenic	NA	NA
chr13	42030724	42031177	Promoter	NM_014059.3	RGCC
chr13	42575816	42575848	Promoter	RPS28P8	RPS28P8
chr13	42671499	42671564	GeneBody	NM_152910.6,NM_178009.5,NM_001204504.3	DGKH
chr13	42673251	42673319	GeneBody	NM_152910.6,NM_178009.5,NM_001204504.3	DGKH
chr13	43100278	43100560	Intergenic	NA	NA
chr13	43192794	43192891	Intergenic	NA	NA
chr13	43207159	43207402	Intergenic	NA	NA
chr13	43330013	43330202	Intergenic	NA	NA
chr13	43697167	43697255	GeneBody	NR_047013.1	LINC00400
chr13	43894290	43894436	GeneBody	NM_001127615.3,NM_001347966.2,NM_017993.5,NM_001242863.3,NM_001347970.2,NM_001347967.2,NM_001347964.2,NM_001347968.2,NM_001347969.2,NM_001347971.2,NM_001347963.2,NM_001347965.2	ENOX1
chr13	44572202	44572335	Intergenic	NA	NA
chr13	44626993	44627254	Intergenic	NA	NA
chr13	44677563	44677835	Intergenic	NA	NA
chr13	44702718	44702820	GeneBody	NR_104065.1,NR_132368.1	LINC00390,SMIM2-AS1
chr13	44735120	44735233	Promoter	NM_024058.3	SMIM2
chr13	45165524	45165862	Intergenic	NA	NA
chr13	45407537	45407705	Intergenic	NA	NA
chr13	45666497	45666540	Intergenic	NA	NA
chr13	45767764	45767945	GeneBody	NM_198404.3,NM_004128.3	GTF2F2,KCTD4
chr13	46467449	46467601	Intergenic	NA	NA
chr13	47469758	47469996	Promoter	NM_000621.5,NM_001165947.5	HTR2A
chr13	47470292	47470440	Promoter	NM_000621.5,NM_001165947.5,NM_001378924.1	HTR2A
chr13	48270376	48270520	Intergenic	NA	NA
chr13	48277109	48277226	Intergenic	NA	NA
chr13	48728147	48728198	Intergenic	NA	NA
chr13	48983759	48984009	GeneBody	NM_000321.3	RB1
chr13	49080255	49080433	GeneBody	NM_001268.4,NM_001352427.2,NM_001286830.2,NM_001352425.2,NM_001352426.2,NM_001352424.2,NM_001286831.2,NM_001352428.2,NM_001286832.2,NM_001352429.2,NR_147985.2	RCBTB2
chr13	49081260	49081573	GeneBody	NM_001268.4,NM_001352427.2,NM_001286830.2,NM_001352425.2,NM_001352426.2,NM_001352424.2,NM_001286831.2,NM_001352428.2,NM_001286832.2,NM_001352429.2,NR_147985.2	RCBTB2
chr13	49105664	49105865	Promoter	NM_001352431.2,NM_001352430.2,NM_001268.4,NM_001352427.2,NM_001286830.2,NM_001352425.2,NM_001352426.2,NM_001352424.2,NM_001286831.2,NM_001352428.2,NM_001286832.2,NR_147985.2	RCBTB2
chr13	51173238	51173286	Intergenic	NA	NA
chr13	51709017	51709241	GeneBody	NR_102432.3,NR_102431.3	C13orf42
chr13	51797355	51797792	Promoter	NM_001330522.2,NM_001242312.2,NM_145019.4	FAM124A
chr13	51817494	51817614	GeneBody	NM_001330522.2,NM_001242312.2,NM_145019.4	FAM124A
chr13	53023248	53023458	Promoter	NM_001282169.2,NM_016075.4,NM_001282168.2	VPS36
chr13	53384287	53384386	Promoter	NR_031582.1	MIR759
chr13	53431666	53431692	Intergenic	NA	NA
chr13	53633091	53633289	Intergenic	NA	NA
chr13	53685122	53685293	Intergenic	NA	NA
chr13	53706591	53706821	GeneBody	NR_125788.1	LINC01065
chr13	54758014	54758246	Intergenic	NA	NA
chr13	59452279	59452366	Intergenic	NA	NA
chr13	61664183	61664499	Intergenic	NA	NA
chr13	61664959	61665025	Intergenic	NA	NA
chr13	62761600	62761810	Intergenic	NA	NA
chr13	62785636	62785934	Promoter	NR_125787.1	LINC01075
chr13	62890448	62890623	Intergenic	NA	NA
chr13	62968665	62968986	Intergenic	NA	NA
chr13	63111568	63111650	Intergenic	NA	NA
chr13	63341631	63341841	GeneBody	NR_047029.1	LINC00448
chr13	64457118	64457341	Intergenic	NA	NA
chr13	64704872	64705007	Intergenic	NA	NA
chr13	67569066	67569232	GeneBody	NR_046637.1,NM_203487.3,NM_001318372.2,NM_020403.5,NM_001318373.2	PCDH9,PCDH9-AS4
chr13	72145336	72145557	GeneBody	NM_001366712.1,NM_080759.6,NM_080760.6,NM_004392.7	DACH1
chr13	73037728	73037947	Intergenic	NA	NA
chr13	74424647	74424908	GeneBody	NM_007249.5	KLF12
chr13	74706432	74706751	Promoter	NM_007249.5	KLF12
chr13	75900371	75900595	GeneBody	NM_001286658.2,NM_001286659.2,NM_014832.5	TBC1D4
chr13	75900814	75901188	GeneBody	NM_001286658.2,NM_001286659.2,NM_014832.5	TBC1D4
chr13	75947503	75947643	GeneBody	NM_001286658.2,NM_001286659.2,NM_014832.5	TBC1D4
chr13	76027042	76027064	GeneBody	NM_001286658.2,NM_001286659.2,NM_014832.5	TBC1D4
chr13	76211561	76211971	Promoter	NM_001306080.2,NR_120410.1,NR_120411.1,NR_120412.1	LMO7-AS1,LMO7
chr13	76249304	76249504	GeneBody	NM_001306080.2,NM_005358.5	LMO7
chr13	77501321	77501522	Promoter	NR_026983.1	BTF3P11
chr13	80315134	80315398	Intergenic	NA	NA
chr13	80657722	80657870	Intergenic	NA	NA
chr13	80911206	80911501	GeneBody	NM_001318537.1,NM_001318538.1,NM_001318536.1,NM_005842.4	SPRY2
chr13	82338022	82338212	Intergenic	NA	NA
chr13	83128305	83128366	Intergenic	NA	NA
chr13	83989628	83989804	Intergenic	NA	NA
chr13	86083173	86083425	GeneBody	NR_046989.1	LINC00351
chr13	86634994	86635212	Intergenic	NA	NA
chr13	89193597	89193650	Promoter	NR_047021.1	LINC00433
chr13	89548832	89548974	Intergenic	NA	NA
chr13	89948739	89949018	Intergenic	NA	NA
chr13	90357740	90357836	Intergenic	NA	NA
chr13	90685233	90685700	Intergenic	NA	NA
chr13	91764187	91764315	Intergenic	NA	NA
chr13	91764893	91765103	Intergenic	NA	NA
chr13	94965128	94965244	GeneBody	NM_005708.5	GPC6
chr13	94997980	94998151	GeneBody	NM_005708.5	GPC6
chr13	95131700	95131808	Promoter	NM_001129889.3,NM_001922.5	DCT
chr13	95172692	95172759	GeneBody	NM_001322186.2,NM_001322184.2,NM_001322183.2,NM_001322185.2,NM_001322182.2	DCT
chr13	95204336	95204530	Intergenic	NA	NA
chr13	95204862	95205096	Intergenic	NA	NA
chr13	95452642	95452695	GeneBody	NR_110754.1	LOC101927284
chr13	96293476	96293835	GeneBody	NM_198968.4,NM_014934.5	DZIP1
chr13	97488026	97488187	GeneBody	NM_153456.4	HS6ST3
chr13	97802141	97802331	GeneBody	NM_001382696.1,NM_001382677.1,NM_001382652.1,NM_001382674.1,NM_001382666.1,NM_001382650.1,NM_001382671.1,NM_001382669.1,NM_001382660.1,NM_001382654.1,NM_001382651.1,NM_001382653.1,NM_001382656.1,NM_001382675.1,NM_001382649.1	MBNL2
chr13	97980530	97980713	GeneBody	NM_001382678.1,NM_001382661.1,NM_001382667.1,NM_001382672.1,NM_001382682.1,NM_001382697.1,NM_001382693.1,NM_001382679.1,NM_001382695.1,NM_001382694.1,NM_001382681.1,NM_001382688.1,NM_207304.3,NM_001382686.1,NM_001382687.1,NM_001382676.1,NM_001306070.2,NM_144778.4,NM_001382684.1,NM_001382673.1,NM_001382685.1,NM_001382683.1,NM_001382670.1,NM_001382691.1,NM_001382692.1,NM_001382689.1,NM_001382690.1,…	MBNL2
chr13	98131788	98131851	Intergenic	NA	NA
chr13	98450865	98450934	Intergenic	NA	NA
chr13	99000884	99001092	GeneBody	NM_005766.4,NM_001286839.2	FARP1
chr13	99314098	99314547	Intergenic	NA	NA
chr13	100279069	100279252	GeneBody	NM_206808.3,NR_104592.2	CLYBL
chr13	100300400	100300790	GeneBody	NM_206808.3,NR_104592.2	CLYBL
chr13	100602600	100602628	GeneBody	NR_120421.1	LOC101927437
chr13	102104572	102104847	Promoter	NM_001271755.2,NM_004791.3,NM_001271754.2	ITGBL1
chr13	103347278	103347390	Promoter	NM_001010977.3	METTL21C
chr13	105300754	105300992	Intergenic	NA	NA
chr13	105367008	105367209	Intergenic	NA	NA
chr13	106114555	106114726	GeneBody	NR_040247.1	DAOA-AS1
chr13	106162872	106162962	Intergenic	NA	NA
chr13	106613913	106614121	Intergenic	NA	NA
chr13	106649982	106650362	Intergenic	NA	NA
chr13	106771449	106771698	Intergenic	NA	NA
chr13	107248728	107248959	Intergenic	NA	NA
chr13	109864721	109864878	Intergenic	NA	NA
chr13	110079778	110080089	Intergenic	NA	NA
chr13	110178592	110178732	Intergenic	NA	NA
chr13	110282873	110282967	Intergenic	NA	NA
chr13	110418477	110418722	GeneBody	NM_003749.3	IRS2
chr13	110775703	110776193	Promoter	NR_148221.1	LOC105370361
chr13	110869715	110870050	GeneBody	NM_001303110.2,NM_001845.6	COL4A1
chr13	110953975	110954193	GeneBody	NM_001303110.2,NM_001845.6	COL4A1
chr13	110966127	110966221	GeneBody	NM_001846.4	COL4A2
chr13	110971879	110971984	GeneBody	NM_001846.4	COL4A2
chr13	110972145	110972415	GeneBody	NM_001846.4	COL4A2
chr13	110972472	110972700	GeneBody	NM_001846.4	COL4A2
chr13	110992995	110993333	Promoter	NR_107040.1	MIR8073
chr13	110993438	110993723	Promoter	NR_107040.1	MIR8073
chr13	110993896	110994245	Promoter	NR_107040.1	MIR8073
chr13	110994795	110995148	Promoter	NR_107040.1	MIR8073
chr13	110995156	110995506	GeneBody	NM_001846.4	COL4A2
chr13	111071271	111071600	GeneBody	NM_001846.4	COL4A2
chr13	111071822	111072124	GeneBody	NM_001846.4	COL4A2
chr13	111101214	111101435	GeneBody	NM_001846.4	COL4A2
chr13	111215048	111215391	Promoter	NM_017817.3	RAB20
chr13	111226473	111226815	Intergenic	NA	NA
chr13	111237108	111237259	Intergenic	NA	NA
chr13	111446966	111447118	Intergenic	NA	NA
chr13	111659269	111659565	Intergenic	NA	NA
chr13	112633303	112633318	GeneBody	NR_120392.1	SOX1-OT
chr13	112774574	112774606	Intergenic	NA	NA
chr13	113407414	113407823	Promoter	NR_109811.1,NR_046661.1	ATP11A-AS1
chr13	113625093	113625407	Promoter	NM_001366644.2,NM_001112732.3	MCF2L
chr13	113887577	113887669	GeneBody	NM_001354940.2,NM_001354942.2,NM_001354941.2,NM_001008895.4,NM_001354939.2,NM_003589.4,NM_001354938.2,NM_001278514.3,NM_001278513.3	CUL4A
chr13	114200677	114200980	GeneBody	NM_001349743.2,NM_001349745.2,NM_001349742.2,NM_001349746.2,NM_001349744.2,NM_017905.6,NR_146221.2,NR_146222.2	TMCO3
chr13	114311797	114312173	Promoter	NM_000705.4	ATP4B
chr13	114516830	114517175	Promoter	NR_044995.2	GAS6-AS1
chr13	114604313	114604527	GeneBody	NR_164112.1	LINC00452
chr13	114951009	114951176	Intergenic	NA	NA
chr14	19374896	19375025	Intergenic	NA	NA
chr14	21191546	21191858	Promoter	RANBP20P	RANBP20P
chr14	21528450	21528639	GeneBody	NM_001282211.2	NDRG2
chr14	22961184	22961264	Promoter	id-TRAJ45,id-TRAJ46,id-TRAJ47,id-TRAJ48	TRAJ48,TRAJ45,TRAJ47,TRAJ46
chr14	22961765	22961865	Promoter	id-TRAJ44,id-TRAJ45,id-TRAJ46,id-TRAJ47	TRAJ45,TRAJ44,TRAJ47,TRAJ46
chr14	23641552	23641794	GeneBody	NM_012244.4	SLC7A8
chr14	24513521	24513770	GeneBody	NM_001277864.2,NR_102691.2,NR_102689.2,NR_102694.2,NR_102692.2,NR_102693.2,NR_102687.2,NR_102688.2	DHRS4L1
chr14	24519928	24520182	Promoter	NM_138360.4	CARMIL3
chr14	24631371	24631612	Promoter	NM_001385402.1,NM_006084.5,NM_001385401.1,NM_001385400.1	IRF9
chr14	25249607	25249894	Intergenic	NA	NA
chr14	26812932	26813027	Intergenic	NA	NA
chr14	30780061	30780238	Intergenic	NA	NA
chr14	30910444	30910574	GeneBody	NR_151720.1	G2E3-AS1
chr14	31439928	31440061	GeneBody	NM_001083893.2,NM_014574.4	STRN3
chr14	33207565	33207683	GeneBody	NM_004274.5	AKAP6
chr14	33962626	33962788	GeneBody	NM_022123.3,NM_001165893.2,NM_173159.3,NM_001164749.2	NPAS3
chr14	34027951	34028049	GeneBody	NM_022123.3,NM_001165893.2,NM_173159.3,NM_001164749.2	NPAS3
chr14	34111182	34111450	GeneBody	NM_022123.3,NM_001165893.2,NM_173159.3,NM_001164749.2	NPAS3
chr14	36348187	36348278	Promoter	LOC644584	LOC644584
chr14	36654836	36654908	Intergenic	NA	NA
chr14	37237198	37237280	GeneBody	NM_030631.4,NM_001171170.2	SLC25A21
chr14	42944506	42944717	Intergenic	NA	NA
chr14	44661235	44661635	Intergenic	NA	NA
chr14	46280250	46280456	Intergenic	NA	NA
chr14	46486128	46486206	Intergenic	NA	NA
chr14	46832000	46832056	GeneBody	NR_102702.1,NR_102701.1	LINC00871
chr14	46967534	46967671	GeneBody	NR_102700.1,NR_102699.1,NR_102702.1,NR_102701.1	LINC00871
chr14	47155987	47156087	Intergenic	NA	NA
chr14	48727798	48728101	Intergenic	NA	NA
chr14	48734734	48734834	Intergenic	NA	NA
chr14	48735227	48735404	Intergenic	NA	NA
chr14	49321525	49321594	Intergenic	NA	NA
chr14	50462184	50462312	GeneBody	NR_126496.1,NR_126497.1,NR_126498.1	LINC01588
chr14	50550150	50550293	GeneBody	NR_131171.1	LINC01599
chr14	51306748	51306846	Intergenic	NA	NA
chr14	51441014	51441171	Intergenic	NA	NA
chr14	51849773	51849992	Intergenic	NA	NA
chr14	51957255	51957476	Promoter	NM_001042481.3	FRMD6
chr14	52315002	52315130	Intergenic	NA	NA
chr14	52383000	52383375	GeneBody	NR_126331.1,NM_001243774.2,NM_001243773.2,NM_053064.5	LOC102723604,GNG2
chr14	52493936	52493995	GeneBody	NM_007361.4	NID2
chr14	55153372	55153473	GeneBody	NM_001161576.2,NM_015589.6	SAMD4A
chr14	55274276	55274384	Intergenic	NA	NA
chr14	56182490	56182661	Intergenic	NA	NA
chr14	56345142	56345259	Intergenic	NA	NA
chr14	56914076	56914336	Intergenic	NA	NA
chr14	57833940	57834113	Intergenic	NA	NA
chr14	59253196	59253251	Intergenic	NA	NA
chr14	59356544	59356812	GeneBody	NR_110547.1	LINC01500
chr14	61446225	61446376	Promoter	NM_153811.3,NM_001172702.2,NR_033344.2,NM_001350254.1,NM_020810.3	TRMT5,SLC38A6
chr14	61592895	61593032	Intergenic	NA	NA
chr14	61603503	61603647	Intergenic	NA	NA
chr14	61696944	61697031	Intergenic	NA	NA
chr14	61990631	61990674	GeneBody	NM_006255.4	PRKCH
chr14	63671619	63672005	Promoter	NM_020663.5	RHOJ
chr14	65036524	65036745	GeneBody	NM_172365.3	PPP1R36
chr14	65047311	65047680	GeneBody	NM_172365.3	PPP1R36
chr14	65051284	65051391	GeneBody	NM_172365.3	PPP1R36
chr14	65257176	65257523	GeneBody	NM_001355437.2,NM_001024858.4,NM_001355436.2	SPTB
chr14	65371506	65371628	Intergenic	NA	NA
[truncated: 5,209 more rows]

## Sheet: Table S5B
Table S5B: Gene annotation for DMRs with methylation gain. Promoters are defined as TSS+/-2kb. DMRs that overlap a gene outside of its promoter are annotated as gene body.
chrom	chromStart	chromEnd	Annotation	Transcript ID	Gene Name
chr1	13416	13536	Promoter	NR_046018.2	DDX11L1
chr1	864312	864748	GeneBody	NM_152486.4,NM_001385641.1,NM_001385640.1	SAMD11
chr1	872114	872467	GeneBody	NM_152486.4,NM_001385641.1,NM_001385640.1	SAMD11
chr1	872486	872836	GeneBody	NM_152486.4,NM_001385641.1,NM_001385640.1	SAMD11
chr1	1068180	1068570	Intergenic	NA	NA
chr1	1068741	1069057	Intergenic	NA	NA
chr1	1099244	1099650	Intergenic	NA	NA
chr1	1099753	1100121	Intergenic	NA	NA
chr1	1100125	1100494	Intergenic	NA	NA
chr1	1100505	1100865	Promoter	NR_029639.1	MIR200B
chr1	1288692	1289002	GeneBody	NM_032348.4,NM_001282584.2,NM_001282585.1,NM_001282583.2,NM_001282582.2	MXRA8
chr1	1289023	1289336	GeneBody	NM_032348.4,NM_001282584.2,NM_001282585.1,NM_001282583.2,NM_001282582.2	MXRA8
chr1	1289460	1289875	GeneBody	NM_032348.4,NM_001282584.2,NM_001282585.1,NM_001282583.2,NM_001282582.2	MXRA8
chr1	1449086	1449537	Promoter	NM_001170536.3,NM_001170535.3,NM_018188.5	ATAD3A
chr1	1449657	1450002	Promoter	NM_001170536.3	ATAD3A
chr1	1608214	1608316	GeneBody	NM_001290264.2,NM_001110781.3	SLC35E2B
chr1	1608727	1609175	GeneBody	NM_001290264.2,NM_001110781.3	SLC35E2B
chr1	1609214	1609623	GeneBody	NM_001290264.2,NM_001110781.3	SLC35E2B
chr1	1708486	1708632	Promoter	NM_001353642.2,NM_023018.5,NM_001198993.2	NADK
chr1	1790520	1790847	GeneBody	NM_002074.5,NM_001282538.2,NM_001282539.2	GNB1
chr1	1897677	1898110	GeneBody	NM_001304360.2	CFAP74
chr1	1986002	1986274	GeneBody	NM_002744.6	PRKCZ
chr1	2384173	2384569	Intergenic	NA	NA
chr1	2436805	2436885	GeneBody	NM_001303013.1,NM_014638.4,NM_001303012.2	PLCH2
chr1	2501581	2502046	GeneBody	NR_121638.1	LOC100996583
chr1	2559272	2559444	GeneBody	NM_033467.4	MMEL1
chr1	2752718	2752762	Intergenic	NA	NA
chr1	2921734	2921956	Intergenic	NA	NA
chr1	2996019	2996202	GeneBody	NM_199454.3,NM_022114.4	PRDM16
chr1	3043771	3044101	Promoter	NR_036215.1	MIR4251
chr1	3115097	3115495	GeneBody	NM_199454.3,NM_022114.4	PRDM16
chr1	3142760	3143093	GeneBody	NM_199454.3,NM_022114.4	PRDM16
chr1	3255043	3255223	GeneBody	NM_199454.3,NM_022114.4	PRDM16
chr1	3357624	3358082	Intergenic	NA	NA
chr1	3587954	3588257	GeneBody	NM_001204186.2,NM_001204188.2,NM_001204187.2,NM_001204185.2,NM_001204184.2,NM_005427.4	TP73
chr1	3588356	3588672	GeneBody	NM_001204186.2,NM_001204188.2,NM_001204187.2,NM_001204185.2,NM_001204184.2,NM_005427.4	TP73
chr1	3604741	3605171	GeneBody	NM_001204186.2,NM_001204188.2,NM_001204187.2,NM_001204185.2,NM_001204184.2,NM_005427.4	TP73
chr1	4004256	4004621	GeneBody	NR_040065.1	LINC01346
chr1	4023126	4023472	Intergenic	NA	NA
chr1	4035473	4035601	Intergenic	NA	NA
chr1	4053680	4053960	Intergenic	NA	NA
chr1	4069087	4069147	Intergenic	NA	NA
chr1	4073348	4073489	Intergenic	NA	NA
chr1	4128237	4128514	Intergenic	NA	NA
chr1	4179536	4179632	Intergenic	NA	NA
chr1	4315318	4315565	Intergenic	NA	NA
chr1	4315609	4315836	Intergenic	NA	NA
chr1	4370995	4371357	Intergenic	NA	NA
chr1	4508194	4508279	Intergenic	NA	NA
chr1	4567105	4567203	Intergenic	NA	NA
chr1	4628698	4628830	Intergenic	NA	NA
chr1	4634102	4634283	GeneBody	NR_147025.1	LINC01646
chr1	4635644	4635742	GeneBody	NR_147025.1	LINC01646
chr1	4647636	4647768	Intergenic	NA	NA
chr1	4651332	4651369	Intergenic	NA	NA
chr1	4656639	4656946	Intergenic	NA	NA
chr1	4660438	4660861	Intergenic	NA	NA
chr1	4761135	4761615	GeneBody	NM_001042478.2,NM_018836.4	AJAP1
chr1	4765866	4766012	GeneBody	NM_001042478.2,NM_018836.4	AJAP1
chr1	4785066	4785241	GeneBody	NM_001042478.2,NM_018836.4	AJAP1
chr1	4796231	4796442	GeneBody	NM_001042478.2,NM_018836.4	AJAP1
chr1	5287461	5287536	Intergenic	NA	NA
chr1	5450656	5450821	Intergenic	NA	NA
chr1	5450931	5451235	Intergenic	NA	NA
chr1	5485213	5485610	Intergenic	NA	NA
chr1	5488354	5488452	Intergenic	NA	NA
chr1	5488592	5488776	Intergenic	NA	NA
chr1	5491475	5491722	Intergenic	NA	NA
chr1	5513101	5513276	Intergenic	NA	NA
chr1	5525689	5525893	Intergenic	NA	NA
chr1	5582286	5582353	Intergenic	NA	NA
chr1	5611979	5612070	Intergenic	NA	NA
chr1	5616480	5616611	Intergenic	NA	NA
chr1	5703592	5703629	Intergenic	NA	NA
chr1	5748642	5748923	Intergenic	NA	NA
chr1	5764625	5764935	Intergenic	NA	NA
chr1	5780559	5780782	Intergenic	NA	NA
chr1	5800892	5801140	Intergenic	NA	NA
chr1	5823990	5824200	Intergenic	NA	NA
chr1	5856858	5857126	Intergenic	NA	NA
chr1	6186282	6186540	GeneBody	NM_015557.3	CHD5
chr1	6201783	6201960	GeneBody	NM_015557.3	CHD5
chr1	6282860	6283155	GeneBody	NM_012405.4	ICMT
chr1	6531726	6532111	GeneBody	NM_020631.6,NM_001265593.1,NM_001042665.1,NM_001042664.1,NM_001265594.2,NM_001265592.2,NM_001042663.3,NM_198681.4	PLEKHG5
chr1	6879342	6879536	GeneBody	NM_001195563.2,NM_001349627.2,NR_146204.2,NM_001242701.2,NR_038934.2,NR_146202.2,NR_146203.2,NM_001349612.2,NM_001349608.2,NM_001349610.2,NM_001349609.2,NM_015215.4	CAMTA1
chr1	7078720	7078818	GeneBody	NM_001349612.2,NM_001349608.2,NM_001349610.2,NM_001349609.2,NM_015215.4	CAMTA1
chr1	7120892	7121205	GeneBody	NM_001349612.2,NM_001349608.2,NM_001349610.2,NM_001349609.2,NM_015215.4	CAMTA1
chr1	7288725	7288794	GeneBody	NM_001349612.2,NM_001349608.2,NM_001349610.2,NM_001349609.2,NM_015215.4	CAMTA1
chr1	7307865	7308144	GeneBody	NM_001349612.2,NM_001349608.2,NM_001349610.2,NM_001349609.2,NM_015215.4	CAMTA1
chr1	7487961	7488304	GeneBody	NM_001349612.2,NM_001349608.2,NM_001349610.2,NM_001349609.2,NM_015215.4	CAMTA1
chr1	7581756	7582201	GeneBody	NM_001349612.2,NM_001349608.2,NM_001349610.2,NM_001349609.2,NM_015215.4	CAMTA1
chr1	7604807	7604971	GeneBody	NM_001349612.2,NM_001349608.2,NM_001349610.2,NM_001349609.2,NM_015215.4	CAMTA1
chr1	8079381	8079490	GeneBody	NM_018948.4	ERRFI1
chr1	8080634	8080899	GeneBody	NM_018948.4	ERRFI1
chr1	8087320	8087764	Promoter	NM_018948.4	ERRFI1
chr1	8194749	8195215	Intergenic	NA	NA
chr1	8242678	8242977	Intergenic	NA	NA
chr1	8408228	8408432	Intergenic	NA	NA
chr1	8683872	8684000	GeneBody	NM_012102.4,NM_001042681.2	RERE
chr1	8740811	8741234	GeneBody	NM_012102.4,NM_001042681.2	RERE
chr1	8881969	8882192	Intergenic	NA	NA
chr1	9063252	9063339	GeneBody	NM_207420.3	SLC2A7
chr1	9147618	9147922	Intergenic	NA	NA
chr1	9355301	9355309	GeneBody	NM_025106.4	SPSB1
chr1	9380755	9381176	GeneBody	NM_025106.4	SPSB1
chr1	9381261	9381697	GeneBody	NM_025106.4	SPSB1
chr1	9600231	9600720	Promoter	NM_032315.3	SLC25A33
chr1	9715243	9715502	Promoter	NR_027045.1	PIK3CD-AS1
chr1	9830471	9830657	GeneBody	NM_001302883.1,NM_014944.4,NM_001009566.3	CLSTN1
chr1	9882408	9882496	Promoter	NM_001009566.3	CLSTN1
chr1	9906032	9906178	Intergenic	NA	NA
chr1	9906344	9906486	Intergenic	NA	NA
chr1	10073419	10073506	GeneBody	NM_052960.3,NR_138250.2	RBP7
chr1	10764530	10764979	GeneBody	NM_017766.5,NM_001079843.3	CASZ1
chr1	10826410	10826653	GeneBody	NM_017766.5,NM_001079843.3	CASZ1
chr1	10868556	10868659	Intergenic	NA	NA
chr1	10950137	10950476	Intergenic	NA	NA
chr1	11391155	11391360	Intergenic	NA	NA
chr1	11400070	11400381	Intergenic	NA	NA
chr1	11402660	11402795	Intergenic	NA	NA
chr1	11447538	11447849	Intergenic	NA	NA
chr1	11451727	11451937	Intergenic	NA	NA
chr1	11481544	11481736	Intergenic	NA	NA
chr1	11499473	11499585	Intergenic	NA	NA
chr1	11543667	11543825	GeneBody	NM_020780.2	DISP3
chr1	11623599	11623676	Intergenic	NA	NA
chr1	11634869	11635093	Intergenic	NA	NA
chr1	11704074	11704251	Intergenic	NA	NA
chr1	11709682	11710142	GeneBody	NM_012168.6	FBXO2
chr1	11710219	11710615	GeneBody	NM_012168.6	FBXO2
chr1	12192731	12192880	GeneBody	NM_001281430.3,NM_001243.5	TNFRSF8
chr1	12692963	12693143	Intergenic	NA	NA
chr1	12817943	12818112	GeneBody	NM_001330361.2,NM_152290.4	C1orf158
chr1	13842668	13842784	Intergenic	NA	NA
chr1	13843150	13843449	Intergenic	NA	NA
chr1	14078169	14078371	GeneBody	NM_001007257.3,NM_015866.5,NM_012231.4,NM_001135610.2	PRDM2
chr1	14087881	14088010	GeneBody	NM_001007257.3,NM_015866.5,NM_012231.4,NM_001135610.2	PRDM2
chr1	14108829	14109022	GeneBody	NM_001007257.3,NM_015866.5,NM_012231.4,NM_001135610.2	PRDM2
chr1	14325756	14325823	Intergenic	NA	NA
chr1	14452707	14452901	Promoter	RNU6-1265P	RNU6-1265P
chr1	14475984	14476103	Intergenic	NA	NA
chr1	14646011	14646163	Intergenic	NA	NA
chr1	14826746	14826856	Intergenic	NA	NA
chr1	15041872	15042122	GeneBody	NM_015209.2,NM_001370230.1,NM_201628.3	KAZN
chr1	15104364	15104469	GeneBody	NM_015209.2,NM_001370230.1,NM_201628.3	KAZN
chr1	15197921	15198047	GeneBody	NM_015209.2,NM_001370230.1,NM_201628.3	KAZN
chr1	15507956	15508155	GeneBody	NM_018022.3,NM_001319665.2,NM_001136218.2,NM_001136217.2,NM_001136216.2,NR_135082.2	TMEM51
chr1	15508308	15508392	GeneBody	NM_018022.3,NM_001319665.2,NM_001136218.2,NM_001136217.2,NM_001136216.2,NR_135082.2	TMEM51
chr1	15541735	15542071	GeneBody	NM_018022.3,NM_001319665.2,NM_001136218.2,NM_001136217.2,NM_001136216.2,NR_135082.2	TMEM51
chr1	15587773	15588157	GeneBody	NM_052929.2,NM_001387888.1	FHAD1
chr1	15888757	15888818	GeneBody	NM_001287811.2,NM_015291.4,NR_109898.2	DNAJC16
chr1	16153064	16153373	Promoter	RPS16P1	RPS16P1
chr1	16428268	16428398	Intergenic	NA	NA
chr1	16433765	16433871	Intergenic	NA	NA
chr1	16642728	16642848	GeneBody	NM_018994.3	FBXO42
chr1	16858835	16859228	Promoter	RNU1-6P	RNU1-6P
chr1	16868699	16868991	Intergenic	NA	NA
chr1	17191990	17192224	Intergenic	NA	NA
chr1	17201790	17202119	Promoter	RNU1-5P,rna-TRN-GTT13-1	TRN-GTT13-1,RNU1-5P
chr1	17287091	17287565	GeneBody	NM_014675.5	CROCC
chr1	17443572	17443701	GeneBody	NM_007365.3	PADI2
chr1	17489303	17489383	Intergenic	NA	NA
chr1	17624472	17624682	Intergenic	NA	NA
chr1	17624826	17624939	Intergenic	NA	NA
chr1	17847794	17848212	Intergenic	NA	NA
chr1	18092151	18092220	GeneBody	NM_030812.3	ACTL8
chr1	18097990	18098162	GeneBody	NM_030812.3	ACTL8
chr1	18140991	18141308	GeneBody	NM_030812.3	ACTL8
chr1	18180132	18180366	Intergenic	NA	NA
chr1	18278944	18279175	Intergenic	NA	NA
chr1	18279291	18279585	Intergenic	NA	NA
chr1	18328317	18328458	Intergenic	NA	NA
chr1	18387590	18387841	Intergenic	NA	NA
chr1	18414748	18415028	Intergenic	NA	NA
chr1	18415444	18415728	Intergenic	NA	NA
chr1	18438043	18438190	GeneBody	NM_032880.5	IGSF21
chr1	18446485	18446663	GeneBody	NM_032880.5	IGSF21
chr1	18492923	18493155	GeneBody	NM_032880.5	IGSF21
chr1	18510791	18511029	GeneBody	NM_032880.5	IGSF21
chr1	18531908	18532129	GeneBody	NM_032880.5	IGSF21
chr1	18612213	18612500	GeneBody	NM_032880.5	IGSF21
chr1	18615450	18615751	GeneBody	NM_032880.5	IGSF21
chr1	18621111	18621399	GeneBody	NM_032880.5	IGSF21
chr1	18678516	18678693	GeneBody	NM_032880.5	IGSF21
chr1	18874256	18874354	Intergenic	NA	NA
chr1	18914616	18914819	Intergenic	NA	NA
chr1	19032145	19032610	GeneBody	NM_013945.3,NM_002584.3,NM_001135254.2	PAX7
chr1	19057460	19057795	GeneBody	NM_013945.3,NM_002584.3,NM_001135254.2	PAX7
chr1	19218586	19218658	Promoter	NM_001161504.2	ALDH4A1
chr1	20135887	20136189	Intergenic	NA	NA
chr1	20136411	20136468	Intergenic	NA	NA
chr1	20272854	20272961	Intergenic	NA	NA
chr1	20316691	20316920	Intergenic	NA	NA
chr1	20392424	20392617	Intergenic	NA	NA
chr1	20397976	20398142	Promoter	NM_000929.3	PLA2G5
chr1	20463873	20463975	Promoter	NM_001360869.2,NM_022819.4	PLA2G2F
chr1	20481009	20481372	Promoter	NR_168502.1,NR_168501.1	LOC117779438
chr1	20491424	20491597	GeneBody	NM_001367969.2,NM_001316722.3	PLA2G2C
chr1	20702744	20702990	GeneBody	NR_033887.1	LINC01141
chr1	20775135	20775344	Intergenic	NA	NA
chr1	20775467	20775529	Intergenic	NA	NA
chr1	20775949	20776084	Intergenic	NA	NA
chr1	21025989	21026224	GeneBody	NM_001287212.2,NM_020816.4,NM_001122819.3	KIF17
chr1	21056501	21056958	GeneBody	NM_001103161.2,NM_001103160.2	SH2D5
chr1	21820499	21820630	Intergenic	NA	NA
chr1	21820805	21821216	Intergenic	NA	NA
chr1	22668655	22668934	Intergenic	NA	NA
chr1	23365944	23366289	GeneBody	NM_015013.4,NM_001363654.2,NM_001009999.3	KDM1A
chr1	23884603	23884911	Promoter	NM_002167.5	ID3
chr1	23884947	23885235	Promoter	NM_002167.5	ID3
chr1	24256233	24256312	Promoter	NR_039615.1	MIR378F
chr1	24310344	24310665	Intergenic	NA	NA
chr1	24866713	24866923	GeneBody	NR_109781.1,NM_001251981.2,NM_001251977.2,NM_001251983.2,NM_013441.4,NM_001251984.2,NM_001251979.2	RCAN3,NCMAP-DT
chr1	25216236	25216376	Intergenic	NA	NA
chr1	25390300	25390672	Intergenic	NA	NA
chr1	25682797	25682866	GeneBody	NM_014313.4	TMEM50A
chr1	26081205	26081403	GeneBody	NM_001385185.1,NM_001385184.1,NM_001289010.2,NM_020379.4,NM_001385183.1,NM_001385182.1	MAN1C1
chr1	26084102	26084239	GeneBody	NM_001385185.1,NM_001385184.1,NM_001289010.2,NM_020379.4,NM_001385183.1,NM_001385182.1	MAN1C1
chr1	26097866	26098169	GeneBody	NM_001385185.1,NM_001385184.1,NM_001289010.2,NM_020379.4,NM_001385183.1,NM_001385182.1	MAN1C1
chr1	26376878	26377007	Intergenic	NA	NA
chr1	26420229	26420501	Intergenic	NA	NA
chr1	27362337	27362495	Intergenic	NA	NA
chr1	27940729	27941144	GeneBody	NM_001042747.2,NM_001042729.2,NM_005248.3	FGR
chr1	28013194	28013448	Promoter	CHMP1AP1	CHMP1AP1
chr1	28196098	28196152	Intergenic	NA	NA
chr1	28484533	28484807	GeneBody	NM_001164723.3,NM_000952.5,NM_001164721.2,NM_001164722.3	PTAFR
chr1	28846791	28846913	GeneBody	NM_001269.6,NM_001048195.4,NM_001048194.4,NM_001381866.2,NM_001048199.3,NM_001381865.2	RCC1
chr1	29141260	29141332	GeneBody	NM_000911.4	OPRD1
chr1	29518763	29518927	Intergenic	NA	NA
chr1	29712173	29712219	Intergenic	NA	NA
chr1	29841081	29841379	Intergenic	NA	NA
chr1	30029887	30030063	Intergenic	NA	NA
chr1	30249117	30249237	Intergenic	NA	NA
chr1	30303910	30304034	Intergenic	NA	NA
chr1	30908555	30908795	Intergenic	NA	NA
chr1	31070706	31070794	Intergenic	NA	NA
chr1	31079364	31079568	Intergenic	NA	NA
chr1	31090415	31090703	Intergenic	NA	NA
chr1	31108191	31108287	Intergenic	NA	NA
chr1	31117157	31117325	Intergenic	NA	NA
chr1	31123647	31124025	Intergenic	NA	NA
chr1	31124208	31124506	Intergenic	NA	NA
chr1	31233451	31233898	Intergenic	NA	NA
chr1	31313861	31313976	Intergenic	NA	NA
chr1	32136447	32136588	GeneBody	NM_001856.4	COL16A1
chr1	33054889	33054984	GeneBody	NM_001291496.2,NM_001040441.3,NR_111980.2	ZBTB8A
chr1	33474061	33474194	GeneBody	NM_001319140.2,NM_001319139.3,NM_001625.4,NM_001319141.3,NM_001199199.3,NM_001319143.2,NM_001319142.3,NM_013411.5,NR_134976.3	AK2
chr1	34072178	34072306	GeneBody	NM_001281956.2,NM_052896.5	CSMD2
chr1	34330044	34330388	Promoter	NM_001352984.2,NM_001379301.1	HMGB4
chr1	34717249	34717391	Intergenic	NA	NA
chr1	34846137	34846260	Intergenic	NA	NA
chr1	35149966	35150274	Intergenic	NA	NA
chr1	35212416	35212675	Intergenic	NA	NA
chr1	35297468	35297689	Intergenic	NA	NA
chr1	35504676	35504788	Intergenic	NA	NA
chr1	35698978	35699184	Intergenic	NA	NA
chr1	36042649	36043059	GeneBody	NM_178548.4	TFAP2E
chr1	36437635	36437813	GeneBody	NM_177422.3,NM_024852.4	AGO3
chr1	36474328	36474401	GeneBody	NM_177422.3,NM_024852.4	AGO3
chr1	36723929	36724358	GeneBody	NM_001321473.2,NM_005119.4,NM_001321471.2	THRAP3
chr1	37091445	37091934	Intergenic	NA	NA
chr1	37195890	37196021	Intergenic	NA	NA
chr1	37712670	37712837	Intergenic	NA	NA
chr1	37783275	37783695	Intergenic	NA	NA
chr1	37857385	37857558	Intergenic	NA	NA
chr1	37941178	37941576	Promoter	NM_001323550.2,NM_025079.3,NM_001323551.2,NR_038842.1	ZC3H12A,LINC01137
chr1	38071120	38071350	Intergenic	NA	NA
chr1	38073197	38073377	Intergenic	NA	NA
chr1	38339194	38339277	GeneBody	NM_001297434.2,NM_001350227.2,NR_158631.1,NM_001350228.1,NM_001365820.1,NM_001365822.1,NM_005540.3,NM_001365824.1,NM_001365823.1,NM_001365821.1,NM_001365825.1,NR_158629.1,NR_158628.1,NR_158630.1	INPP5B
chr1	38517592	38517709	GeneBody	NR_168387.1,NR_168386.1	MIR3659HG
chr1	38531964	38532093	GeneBody	NR_168386.1	MIR3659HG
chr1	38615760	38615848	Intergenic	NA	NA
chr1	39027283	39027567	Intergenic	NA	NA
chr1	39206975	39207290	Intergenic	NA	NA
chr1	39212872	39213185	Intergenic	NA	NA
chr1	39254811	39254966	Intergenic	NA	NA
chr1	39281398	39281840	Intergenic	NA	NA
chr1	39281861	39282300	Intergenic	NA	NA
chr1	39297989	39298059	Intergenic	NA	NA
chr1	39788188	39788351	GeneBody	NM_012090.5	MACF1
chr1	39979912	39980238	Promoter	NR_132962.1	OXCT2P1
chr1	40146592	40146759	GeneBody	NM_001282396.2,NM_016257.4,NM_001282397.2	HPCAL4
chr1	40606339	40606556	Intergenic	NA	NA
chr1	41249991	41250398	Promoter	NM_172163.3,NM_004700.4	KCNQ4
chr1	41588782	41588879	GeneBody	NM_001172221.2,NM_001350667.2,NM_001172218.2,NM_012236.4,NM_001172219.2,NM_001172220.2,NM_001031694.2,NM_001350668.1,NM_001172222.2,NR_135092.1	SCMH1
chr1	41807686	41807924	Intergenic	NA	NA
chr1	41849124	41849609	Intergenic	NA	NA
chr1	42599678	42599788	Intergenic	NA	NA
chr1	43151227	43151380	GeneBody	NM_004559.5,NR_132737.2	YBX1
chr1	43411174	43411471	GeneBody	NM_006516.4	SLC2A1
chr1	44544085	44544406	Intergenic	NA	NA
chr1	44620410	44620678	Promoter	OOSP1P1	OOSP1P1
chr1	44883084	44883474	GeneBody	NM_001376488.1,NM_001376487.1,NM_018150.4,NM_001376486.1,NM_001319956.1	RNF220
chr1	45008438	45008914	GeneBody	NM_001319957.2,NM_001376488.1,NM_001376487.1,NM_018150.4,NM_001376486.1,NM_001319956.1	RNF220
chr1	45010705	45010774	Promoter	NR_049849.1	MIR5584
chr1	45434253	45434499	GeneBody	NM_001166588.3,NM_020365.5,NM_001261418.2	EIF2B3
chr1	45637852	45637945	GeneBody	NM_020883.2	ZSWIM5
chr1	46009545	46009752	Intergenic	NA	NA
chr1	46062110	46062261	GeneBody	NM_001195193.2,NM_152298.4,NM_002482.4	NASP
chr1	46547007	46547182	GeneBody	NM_001328651.1,NM_001328650.1,NM_003629.4,NM_001328652.2,NM_001303429.2,NM_001328653.2,NM_001328654.2,NM_001303428.1,NM_001114172.1,NM_001328649.1,NM_001328648.1,NR_137329.2,NM_001303427.2	P3R3URF-PIK3R3,PIK3R3
chr1	48002567	48002648	Intergenic	NA	NA
chr1	48024691	48024944	Intergenic	NA	NA
chr1	48379286	48379327	GeneBody	NM_001194986.2	TRABD2B
chr1	48564975	48565076	Intergenic	NA	NA
chr1	48908758	48908966	GeneBody	NM_019073.4,NM_001286238.2,NM_001286239.2	SPATA6
chr1	48909351	48909476	GeneBody	NM_019073.4,NM_001286238.2,NM_001286239.2	SPATA6
chr1	49127681	49127951	GeneBody	NM_001323574.2,NM_001323573.2,NM_032785.4,NM_001323575.2,NR_136623.2	AGBL4
chr1	50086960	50087026	GeneBody	NM_001323574.2,NM_001323573.2,NM_032785.4,NM_001323575.2,NR_136623.2	AGBL4
chr1	50274232	50274439	GeneBody	NM_001323574.2,NM_001323573.2,NM_032785.4,NM_001323575.2,NR_136623.2	AGBL4
chr1	50302294	50302419	GeneBody	NM_001323574.2,NM_001323573.2,NM_032785.4,NM_001323575.2,NR_136623.2	AGBL4
chr1	50574155	50574240	Promoter	NM_001324216.1,NM_001144774.3,NM_021952.5,NM_001324209.2,NM_001324212.2,NM_001324217.2,NM_001324215.2,NM_001294348.2,NM_001324213.2,NM_001324214.2,NR_136725.2	ELAVL4
chr1	50880756	50881218	Intergenic	NA	NA
chr1	51900364	51900562	GeneBody	NM_001981.3	EPS15
chr1	53057424	53057522	Intergenic	NA	NA
chr1	53415145	53415247	GeneBody	NM_001007098.3,NM_001330587.2,NM_001193617.2,NM_001193599.2,NM_001193600.2,NM_002979.5	SCP2
chr1	53655938	53656098	Intergenic	NA	NA
chr1	53817230	53817359	Intergenic	NA	NA
chr1	53999901	54000047	GeneBody	NM_147193.3,NM_001367484.1	GLIS1
chr1	54113125	54113235	GeneBody	NM_147193.3,NM_001367484.1	GLIS1
chr1	54163574	54163734	GeneBody	NM_147193.3,NM_001367484.1	GLIS1
chr1	54163840	54164034	GeneBody	NM_147193.3,NM_001367484.1	GLIS1
chr1	54578727	54578867	Intergenic	NA	NA
chr1	54838714	54838766	GeneBody	NM_145716.4,NM_018070.5,NM_001009955.4	SSBP3
chr1	55241879	55242028	Intergenic	NA	NA
chr1	55376784	55377071	Intergenic	NA	NA
chr1	55560951	55561047	GeneBody	NM_015306.3	USP24
chr1	55662429	55662571	GeneBody	NM_015306.3	USP24
chr1	55678335	55678648	GeneBody	NM_015306.3	USP24
chr1	55755351	55755596	Intergenic	NA	NA
chr1	57076585	57076676	Intergenic	NA	NA
chr1	57109954	57110297	Promoter	NM_006252.4,NR_135111.1	LOC101929935,PRKAA2
chr1	57377066	57377179	GeneBody	NM_000562.3	C8A
chr1	57415199	57415409	GeneBody	NM_001278543.2,NM_001278544.2,NM_000066.4	C8B
chr1	57737075	57737187	GeneBody	NM_001365795.2,NM_001365794.2,NM_001353980.2,NM_001365793.1,NM_001365792.1,NM_001353986.2,NM_001353985.2,NM_001353983.2,NM_001379462.1,NM_021080.5,NM_001379461.1	DAB1
chr1	58381617	58381778	GeneBody	NM_001353980.2,NM_001379462.1,NM_021080.5,NM_001379461.1	DAB1
chr1	58499798	58499954	GeneBody	NM_001353980.2,NM_001379462.1,NM_021080.5,NM_001379461.1	DAB1
chr1	58553899	58554007	GeneBody	NM_001353980.2,NM_001379462.1,NM_021080.5,NM_001379461.1	DAB1
chr1	59054487	59054765	Intergenic	NA	NA
chr1	59359276	59359430	GeneBody	NR_108106.1,NR_034015.1,NR_034014.1	LINC01135
chr1	59392644	59392782	Intergenic	NA	NA
chr1	59395321	59395450	Intergenic	NA	NA
chr1	60223073	60223228	GeneBody	NM_001278224.2,NM_001244714.2,NM_001350799.2,NM_001350794.2,NM_001350790.2,NM_001350792.2,NM_001350791.2,NM_001350795.2,NM_001113411.2,NM_018291.5,NM_001350796.2,NM_001350798.2,NM_001350797.2,NM_001350793.2	FGGY
chr1	61087296	61087531	Promoter	NR_146508.1	LINC01748
chr1	61106353	61106449	Intergenic	NA	NA
chr1	61208309	61208394	GeneBody	NR_110628.1	LOC101926964
chr1	61391064	61391297	Intergenic	NA	NA
chr1	61758596	61758758	GeneBody	NM_005595.5,NM_001134673.4,NM_001145512.2,NM_001145511.2	NFIA
chr1	61910599	61910769	GeneBody	NM_005595.5,NM_001134673.4,NM_001145512.2,NM_001145511.2	NFIA
chr1	61910899	61911061	GeneBody	NM_005595.5,NM_001134673.4,NM_001145512.2,NM_001145511.2	NFIA
chr1	62106892	62106961	Intergenic	NA	NA
chr1	62636700	62636799	Intergenic	NA	NA
chr1	62814386	62814469	Intergenic	NA	NA
chr1	62845980	62846065	Intergenic	NA	NA
chr1	63420934	63421055	Intergenic	NA	NA
chr1	63477574	63477647	Promoter	NR_146607.1,NR_146605.1,NR_146606.1	LINC01739
chr1	64164079	64164176	Intergenic	NA	NA
chr1	64649454	64649603	Intergenic	NA	NA
chr1	64649758	64649910	Intergenic	NA	NA
chr1	65005863	65006160	GeneBody	NM_001293274.2,NM_020925.4	CACHD1
chr1	65006601	65006707	GeneBody	NM_001293274.2,NM_020925.4	CACHD1
chr1	65330014	65330160	GeneBody	NM_001321855.2,NM_002227.4,NM_001321857.2,NM_001320923.2,NM_001321856.2,NM_001321853.2,NM_001321854.2,NM_001321852.2	JAK1
chr1	66257265	66257414	Promoter	NM_002600.4,NM_001297440.2,NM_001037341.2	PDE4B
chr1	67746584	67746676	Intergenic	NA	NA
chr1	67780483	67780540	GeneBody	NM_001374259.2,NM_001258215.1,NM_001258216.1,NM_001559.2,NM_001319233.1,NM_001258214.1,NR_047583.1,NR_047584.1	IL12RB2
chr1	68357162	68357341	GeneBody	NR_040077.1	GNG12-AS1
chr1	68786811	68787053	Intergenic	NA	NA
chr1	68867404	68867517	Intergenic	NA	NA
chr1	69139611	69139724	Intergenic	NA	NA
chr1	70036026	70036337	Promoter	NM_001366842.1,NM_001366840.1,NM_001350216.3,NM_001366841.1	LRRC7
chr1	71173304	71173533	Promoter	NR_125938.1	LINC01788
chr1	71922187	71922461	GeneBody	NM_173808.3	NEGR1
chr1	72155837	72156156	GeneBody	NM_173808.3	NEGR1
chr1	73177166	73177298	Intergenic	NA	NA
chr1	74804095	74804245	GeneBody	NM_015978.3,NM_001199327.2,NM_001112808.3	FPGT-TNNI3K,TNNI3K
chr1	74929640	74929922	GeneBody	NM_015978.3,NM_001199327.2,NM_001112808.3	FPGT-TNNI3K,TNNI3K
chr1	75592065	75592163	Intergenic	NA	NA
chr1	75592314	75592521	Promoter	NM_001001933.1	LHX8
chr1	75599897	75599986	Promoter	NM_001256114.2	LHX8
chr1	76967266	76967451	GeneBody	NM_001349110.2,NM_001160011.3,NM_001349105.2,NM_001349108.2,NM_001349107.2,NM_152996.4,NM_001349111.2,NM_001349106.2,NM_001349109.3,NR_146056.2	ST6GALNAC3
chr1	77813523	77813677	GeneBody	NM_012093.4,NM_174858.3	AK5
chr1	78510567	78510768	Promoter	LOC100131495,NM_017655.6,NM_001304725.2	LOC100131495,GIPC2
chr1	79051448	79051564	Intergenic	NA	NA
chr1	80906956	80907044	Intergenic	NA	NA
chr1	82627543	82627778	Intergenic	NA	NA
chr1	83070308	83070405	Intergenic	NA	NA
chr1	83445648	83445782	GeneBody	NR_110632.1,NR_110633.1,NR_147074.1	LINC01362,LINC01361
chr1	84244957	84245094	GeneBody	NR_119375.1	LINC01725
chr1	85072805	85073006	GeneBody	NR_125761.1	LINC01461
chr1	85557434	85557616	GeneBody	NM_001288563.2,NM_145172.5	DNAI3
chr1	85589834	85589906	GeneBody	NM_001288563.2,NM_145172.5	DNAI3
chr1	86993059	86993216	Intergenic	NA	NA
chr1	87584539	87584639	Intergenic	NA	NA
chr1	87621919	87622328	GeneBody	NR_026989.1	LINC01140
chr1	87637250	87637303	Intergenic	NA	NA
chr1	87939897	87940003	Intergenic	NA	NA
chr1	88031689	88031825	Intergenic	NA	NA
chr1	88151055	88151217	Intergenic	NA	NA
chr1	88330421	88330505	Intergenic	NA	NA
chr1	88368778	88368886	Intergenic	NA	NA
chr1	88642954	88643245	Intergenic	NA	NA
chr1	89487063	89487191	Promoter	NM_001319181.2,NM_001319179.2,NM_001319180.2,NM_018284.3,NR_135007.2	GBP3
chr1	89845994	89846030	GeneBody	NM_001320257.2,NM_198460.3	GBP6
chr1	89984078	89984192	Intergenic	NA	NA
chr1	90667195	90667309	Intergenic	NA	NA
chr1	90674468	90674603	Intergenic	NA	NA
chr1	90799812	90799889	Intergenic	NA	NA
chr1	90965320	90965564	Intergenic	NA	NA
chr1	91227318	91227597	Intergenic	NA	NA
chr1	91260011	91260202	GeneBody	NR_135038.1	LINC02609
chr1	91297601	91297777	GeneBody	NR_147932.1,NR_147931.1,NR_147930.1,NR_135038.1	LINC02609
chr1	91298005	91298305	GeneBody	NR_147932.1,NR_147931.1,NR_147930.1,NR_135038.1	LINC02609
chr1	91299898	91300091	Promoter	NR_147932.1	LINC02609
chr1	91300189	91300445	Promoter	NR_147932.1	LINC02609
chr1	91302869	91303187	Promoter	NR_147932.1	LINC02609
chr1	91303276	91303543	Promoter	NR_147932.1	LINC02609
chr1	91304733	91305033	GeneBody	NR_147931.1,NR_147930.1,NR_135038.1	LINC02609
chr1	91305595	91305795	GeneBody	NR_147931.1,NR_147930.1,NR_135038.1	LINC02609
chr1	91305991	91306116	GeneBody	NR_147931.1,NR_147930.1,NR_135038.1	LINC02609
chr1	91306226	91306648	GeneBody	NR_147931.1,NR_147930.1,NR_135038.1	LINC02609
chr1	91306962	91307321	GeneBody	NR_147931.1,NR_147930.1,NR_135038.1	LINC02609
chr1	91625842	91625982	Intergenic	NA	NA
chr1	91626098	91626163	Intergenic	NA	NA
chr1	91638662	91638687	Intergenic	NA	NA
chr1	91662931	91663037	Intergenic	NA	NA
chr1	93343369	93343574	Promoter	NM_001252271.2	DIPK1A
chr1	93970706	93970975	GeneBody	NM_017737.5,NM_001024948.3,NM_001164473.3	FNBP1L
chr1	94911222	94911477	GeneBody	NM_001122674.2,NM_002858.4	ABCD3
chr1	95080671	95080797	Intergenic	NA	NA
chr1	95249583	95249845	GeneBody	NR_160782.1,NR_160783.1,NR_160781.1,NR_160784.1,NR_104131.2,NR_160779.1,NR_160780.1	SLC44A3-AS1
chr1	95271934	95271998	GeneBody	NR_160782.1,NR_160783.1,NR_160781.1,NR_160784.1,NR_104131.2,NR_160779.1,NR_160780.1	SLC44A3-AS1
chr1	95873127	95873252	Intergenic	NA	NA
chr1	96421362	96421557	Intergenic	NA	NA
chr1	97679313	97679505	GeneBody	NR_046590.1,NM_000110.4	DPYD-AS1,DPYD
chr1	97818291	97818474	GeneBody	NM_000110.4	DPYD
chr1	98330210	98330373	GeneBody	NM_001160301.1,NM_000110.4	DPYD
chr1	98682104	98682225	GeneBody	NR_046088.1	LINC01776
chr1	98924201	98924259	Intergenic	NA	NA
chr1	99705367	99705538	Intergenic	NA	NA
chr1	99705670	99705772	Intergenic	NA	NA
chr1	99992594	99992683	Intergenic	NA	NA
chr1	99999595	99999708	Intergenic	NA	NA
chr1	100512999	100513276	GeneBody	NM_033055.3	MFSD14A
chr1	101727731	101727841	Intergenic	NA	NA
chr1	101760887	101760945	Intergenic	NA	NA
chr1	102082105	102082226	Intergenic	NA	NA
chr1	103255857	103255998	Intergenic	NA	NA
chr1	103763404	103763491	Intergenic	NA	NA
chr1	105005593	105005705	Intergenic	NA	NA
chr1	105005845	105005927	Intergenic	NA	NA
chr1	105006033	105006287	Intergenic	NA	NA
chr1	107051277	107051423	Intergenic	NA	NA
chr1	108764793	108765020	Intergenic	NA	NA
chr1	109238327	109238405	GeneBody	NM_018061.4,NM_001349768.2,NM_001349759.2,NM_001349769.2,NM_001349765.2,NM_001349771.2,NM_001349762.2,NM_001349766.2,NM_001349764.2,NM_001349757.2,NM_001349770.2,NM_001349763.2,NM_001349761.2,NM_001349767.2,NM_001349758.2	PRPF38B
chr1	109504752	109505078	Promoter	NM_001377459.1,NM_001377458.1,NM_001278202.2,NM_001377470.1,NM_001377460.1,NM_001377461.1,NM_015127.5,NM_001377469.1,NM_001048210.3,NM_001377468.1,NM_001377463.1,NM_001377465.1,NM_001377466.1,NM_001377467.1,NM_001377462.1,NM_001377464.1,NR_165299.1	CLCC1
chr1	109660338	109660516	GeneBody	NM_001284352.2,NM_001267048.2,NM_020775.5	ELAPOR1
chr1	109712751	109712945	GeneBody	NM_001284352.2,NM_001267048.2,NM_020775.5	ELAPOR1
chr1	109713834	109714216	GeneBody	NM_001284352.2,NM_001267048.2,NM_020775.5	ELAPOR1
chr1	109933421	109933518	GeneBody	NM_001205228.2,NM_002959.7	SORT1
chr1	110050067	110050218	GeneBody	NM_020703.4	AMIGO1
chr1	110490306	110490507	Intergenic	NA	NA
chr1	110612129	110612553	Promoter	NM_006492.3	ALX3
chr1	110729303	110729423	GeneBody	NM_001010898.4	SLC6A17
chr1	111050678	111050893	Intergenic	NA	NA
chr1	111685086	111685260	GeneBody	NM_006090.5,NM_001330743.2,NM_001007794.3,NR_138484.2,NR_138483.2,NR_138485.2	CEPT1
chr1	112425741	112425850	GeneBody	NM_004980.5,NM_172198.3,NM_001378969.1,NM_001378970.1	KCND3
chr1	112435487	112435636	GeneBody	NM_004980.5,NM_172198.3,NM_001378969.1,NM_001378970.1	KCND3
chr1	112498934	112499038	GeneBody	NM_004980.5,NM_172198.3,NM_001378969.1,NM_001378970.1	KCND3
chr1	112583751	112583903	Intergenic	NA	NA
chr1	112611905	112612030	Intergenic	NA	NA
chr1	112828237	112828415	Intergenic	NA	NA
chr1	112868214	112868557	Intergenic	NA	NA
chr1	113752988	113753153	Intergenic	NA	NA
chr1	113785169	113785250	Intergenic	NA	NA
chr1	114657175	114657344	GeneBody	NM_205848.4,NM_001366223.1,NM_001253772.2,NM_001366224.1,NM_001366225.1,NM_001270805.2,NM_001366226.1	SYT6
chr1	114665553	114665741	GeneBody	NM_205848.4,NM_001366223.1,NM_001253772.2,NM_001366224.1,NM_001366225.1,NM_001270805.2,NM_001366226.1	SYT6
chr1	115624130	115624186	GeneBody	NM_005725.6,NM_001308316.2,NM_001308315.2	TSPAN2
chr1	115729798	115729953	Intergenic	NA	NA
chr1	115737935	115738073	Intergenic	NA	NA
chr1	115881233	115881625	Promoter	NM_002506.3	NGF
chr1	116100148	116100303	Promoter	ELOCP20	ELOCP20
chr1	116235354	116235530	GeneBody	NM_001172412.2,NM_001172411.2,NM_138959.3	VANGL1
chr1	116255646	116255781	GeneBody	NM_001232.4	CASQ2
chr1	116335731	116335833	Intergenic	NA	NA
chr1	116618643	116618797	Intergenic	NA	NA
chr1	117238915	117239312	GeneBody	NR_149353.1	LINC02868
chr1	117239907	117240052	GeneBody	NR_149353.1	LINC02868
chr1	117601047	117601120	Promoter	NR_110786.1,NM_003594.4	TTF2,LOC101929099
chr1	117906314	117906400	Intergenic	NA	NA
chr1	117944781	117944904	GeneBody	NM_006699.5	MAN1A2
chr1	118084247	118084399	Intergenic	NA	NA
chr1	118113559	118113740	Intergenic	NA	NA
chr1	118113848	118113945	Intergenic	NA	NA
chr1	118173377	118173651	Intergenic	NA	NA
chr1	118228714	118228862	Intergenic	NA	NA
chr1	118687604	118687708	GeneBody	NM_206996.4	SPAG17
chr1	119634451	119634764	GeneBody	NM_001378227.1,NM_001378230.1,NM_001378226.1,NM_015836.4,NM_001378231.1,NM_001378228.1,NM_001378229.1,NM_201263.2	WARS2
chr1	119803194	119803277	GeneBody	NR_125975.1	WARS2-AS1
chr1	120152744	120152957	Intergenic	NA	NA
chr1	120309253	120309340	GeneBody	NM_005518.4,NM_001166107.1	HMGCS2
chr1	121356733	121356908	Intergenic	NA	NA
chr1	145375321	145375501	Intergenic	NA	NA
chr1	146724155	146724428	GeneBody	NM_001348452.2_2,NM_001256338.3_2,NM_001348454.2_2,NM_001348456.2_2,NM_001256337.3_2,NM_001348466.2_2,NM_001348463.2_2,NM_001348459.2_2,NM_001348464.2_2,NM_001348461.2_2,NM_001348457.2_2,NM_001348453.2_2,NM_001256336.3_2,NM_024568.4_2,NM_001348455.2_2,NM_001348458.2_2,NM_001348465.2_2,NM_001348460.2_2,NM_001348462.2_2,NM_004284.6_2,NR_145687.2_2,NR_145690.2_2,NR_145688.2_2,NR_145695.2_2,NR_145684…	CHD1L
chr1	148195835	148195963	GeneBody	LOC729086_2	LOC729086
chr1	148234514	148234672	Intergenic	NA	NA
chr1	148526626	148526861	Intergenic	NA	NA
chr1	148527625	148527951	Intergenic	NA	NA
chr1	148611845	148612003	Intergenic	NA	NA
chr1	149147933	149148372	Promoter	RNU1-114P_2	RNU1-114P
chr1	149149349	149149803	Intergenic	NA	NA
chr1	149433286	149433394	Intergenic	NA	NA
chr1	149712087	149712400	Promoter	rna-TRN-GTT8-1	TRN-GTT8-1
chr1	149765533	149765701	GeneBody	NR_166122.1_2,NR_166123.1_2,NM_001161334.2_2	H2BC18,FCGR1A
chr1	150414151	150414259	GeneBody	NM_001387114.1_2,NM_001387118.1_2,NM_001387115.1_2,NM_001297673.2_2,NM_001297674.2_2,NM_001387117.1_2,NM_001387119.1_2,NM_001387116.1_2,NM_001387120.1_2,NM_015203.5_2,NM_001387121.1_2,NM_001387122.1_2,NM_001387123.1_2,NM_001387124.1_2	RPRD2
chr1	150600576	150600737	Promoter	NM_207168.2,NM_207047.2,NM_207043.2,NM_207044.2,NM_004436.4,NM_207045.2,NM_207046.2,NM_207042.2	ENSA
chr1	151001710	151001803	GeneBody	NM_001303229.2,NM_001303243.2,NM_001303242.2,NM_021222.3,NR_130130.2,NR_130132.2,NR_130131.2,NR_130135.2	PRUNE1
chr1	151841163	151841392	Intergenic	NA	NA
chr1	152757599	152757740	Promoter	NM_178353.2	LCE1E
chr1	152795947	152796118	Intergenic	NA	NA
chr1	152979418	152979588	Intergenic	NA	NA
chr1	153147825	153147953	Promoter	NR_110685.1	LOC101928009
chr1	153465912	153466009	Intergenic	NA	NA
chr1	153590233	153590364	Promoter	NM_020672.3	S100A14
chr1	154323944	154324252	Intergenic	NA	NA
chr1	154324326	154324668	Intergenic	NA	NA
chr1	154358195	154358434	Intergenic	NA	NA
chr1	154465810	154465994	GeneBody	NM_001010846.3,NR_135169.2	SHE
chr1	154494486	154494606	GeneBody	NM_182499.4,NM_001098475.2	TDRD10
chr1	154982793	154982909	GeneBody	NM_001256455.2,NM_001252406.3,NM_001377455.1,NM_001377451.1,NM_001377453.1,NM_001377452.1,NM_001377454.1	ZBTB7B
chr1	155630935	155631116	GeneBody	NM_001198899.2,NM_018253.4,NM_139119.3,NM_001198905.2,NM_001198900.2,NM_001198902.2,NM_001198906.2,NM_139118.3,NM_139121.3,NM_001198901.2,NM_001198903.1,NM_001198904.1	YY1AP1
chr1	155831430	155831511	GeneBody	NM_152280.5	SYT11
chr1	156409357	156409635	Intergenic	NA	NA
chr1	156682900	156682971	Intergenic	NA	NA
chr1	157480796	157480898	Intergenic	NA	NA
chr1	158088007	158088340	Intergenic	NA	NA
chr1	158153386	158153451	GeneBody	NM_001371761.1,NM_001371763.1,NM_001319145.2,NM_001371762.2,NM_001766.4	CD1D
chr1	158156453	158156597	Intergenic	NA	NA
chr1	159157332	159157576	GeneBody	NM_001346510.2,NM_001127173.3,NM_021189.5	CADM3
chr1	159157753	159157853	GeneBody	NM_001346510.2,NM_001127173.3,NM_021189.5	CADM3
chr1	159157956	159158205	GeneBody	NM_001346510.2,NM_001127173.3,NM_021189.5	CADM3
chr1	159170624	159170813	Promoter	NR_037870.1	CADM3-AS1
chr1	159249874	159250031	Promoter	OR10J2P	OR10J2P
chr1	159644010	159644187	Intergenic	NA	NA
chr1	160053604	160054071	GeneBody	NM_004983.3	KCNJ9
chr1	160054075	160054542	GeneBody	NM_004983.3	KCNJ9
chr1	160663088	160663233	GeneBody	NM_001256030.2,NM_001778.4	CD48
chr1	160740456	160740546	Intergenic	NA	NA
chr1	160923190	160923266	Promoter	NM_080878.3	ITLN2
chr1	161055662	161055884	GeneBody	NM_030916.3	NECTIN4
chr1	161231210	161231272	GeneBody	NM_001102566.2	PCP4L1
chr1	161397866	161398032	Promoter	rna-TRN-GTT2-2	TRN-GTT2-2
chr1	161502517	161502736	Promoter	rna-TRG-TCC2-6	TRG-TCC2-6
chr1	161536261	161536330	Intergenic	NA	NA
chr1	162908940	162909028	Intergenic	NA	NA
chr1	164603506	164603607	GeneBody	NM_001353130.1,NM_001204963.2,NM_001204961.2,NM_002585.4,NM_001353131.2	PBX1
chr1	164609716	164609855	Promoter	RNU6-171P	RNU6-171P
chr1	165253773	165254161	GeneBody	NM_001174069.2,NM_177398.4	LMX1A
chr1	165508685	165508811	GeneBody	NR_026744.2	LRRC52-AS1
chr1	165707485	165707659	GeneBody	NM_019026.6,NM_001256165.1,NM_001256164.1,NR_045818.1	TMCO1
chr1	166203318	166203512	Intergenic	NA	NA
chr1	166940055	166940205	GeneBody	NM_199351.3	ILDR2
chr1	167052150	167052276	GeneBody	NM_005814.3	GPA33
chr1	167397255	167397322	Intergenic	NA	NA
chr1	167786472	167786558	GeneBody	NM_001297772.2,NM_018417.6,NM_001167749.3	ADCY10
chr1	168297415	168297486	Intergenic	NA	NA
chr1	168539333	168539498	Intergenic	NA	NA
chr1	169029335	169029690	GeneBody	NR_104091.1	LINC00970
chr1	169838031	169838252	GeneBody	NM_181093.4,NM_020423.7	SCYL3
chr1	169861459	169861750	Promoter	NM_181093.4,NM_020423.7	SCYL3
chr1	172150567	172150738	GeneBody	NM_001136127.3,NM_015569.5,NM_001350204.2,NM_001350206.2,NR_146559.2	DNM3
chr1	172558173	172558303	GeneBody	NM_001282750.2,NM_001282751.2,NM_014283.5,NM_016227.4	SUCO
chr1	172631008	172631189	GeneBody	NM_001302746.2,NM_000639.3	FASLG
chr1	172864346	172864529	Intergenic	NA	NA
chr1	173993051	173993416	Promoter	NM_172071.4	RC3H1
chr1	174160099	174160214	GeneBody	NM_001366445.1,NM_001366447.1,NM_014857.5,NM_001366448.1,NM_001366446.1,NR_158981.1,NR_158982.1	RABGAP1L
chr1	174348063	174348244	GeneBody	NM_001366449.1,NM_001366445.1,NM_001366447.1,NM_014857.5,NM_001366448.1,NM_001366446.1,NR_158982.1	RABGAP1L
chr1	174544873	174544973	GeneBody	NM_001366447.1,NM_014857.5,NM_001366448.1,NM_001366446.1,NR_158982.1	RABGAP1L
chr1	174843766	174844009	Promoter	NM_001035230.3,NM_001243763.2,NM_001366457.1	RABGAP1L
chr1	175466323	175466457	GeneBody	NM_003285.3,NM_001328635.2	TNR
chr1	175542075	175542257	GeneBody	NM_003285.3,NM_001328635.2	TNR
chr1	175874768	175874923	Intergenic	NA	NA
chr1	176596095	176596152	GeneBody	NM_021936.3,NM_020318.3	PAPPA2
chr1	176794874	176795022	GeneBody	NM_020318.3	PAPPA2
chr1	177285110	177285265	Intergenic	NA	NA
chr1	177285367	177285650	Intergenic	NA	NA
chr1	177411767	177411992	Intergenic	NA	NA
chr1	177939224	177939545	Promoter	NM_001356499.2,NM_033127.4	SEC16B
chr1	178921111	178921226	Intergenic	NA	NA
chr1	179263640	179263958	Promoter	NM_001252512.2,NM_001252511.2,NM_003101.6,NR_045530.2	SOAT1
chr1	179486596	179486789	GeneBody	NM_144696.6,NR_073544.2	AXDND1
chr1	179795904	179796023	Intergenic	NA	NA
chr1	180125230	180125482	Promoter	NM_001004128.3,NM_002826.5	QSOX1
chr1	180214025	180214103	GeneBody	NM_033343.4	LHX4
chr1	180230924	180231025	GeneBody	NM_033343.4	LHX4
chr1	180239539	180239641	GeneBody	NR_037642.1,NM_033343.4	LHX4-AS1,LHX4
chr1	181223694	181224027	Intergenic	NA	NA
chr1	181299625	181299669	Intergenic	NA	NA
chr1	181443621	181443790	Intergenic	NA	NA
chr1	181468962	181469165	GeneBody	NM_001205294.2,NM_000721.4,NM_001205293.3	CACNA1E
chr1	181513680	181513892	GeneBody	NM_001205294.2,NM_000721.4,NM_001205293.3	CACNA1E
chr1	181545460	181545657	GeneBody	NM_001205294.2,NM_000721.4,NM_001205293.3	CACNA1E
chr1	181616633	181616771	GeneBody	NM_001205294.2,NM_000721.4,NM_001205293.3	CACNA1E
chr1	181874231	181874294	Intergenic	NA	NA
chr1	181888310	181888608	Intergenic	NA	NA
chr1	182284476	182284638	Promoter	NR_104175.1	LINC01344
chr1	182305584	182305785	Promoter	EIF1P3	EIF1P3
chr1	182668970	182669337	GeneBody	NM_001387847.1	RGS8
chr1	182669398	182669712	GeneBody	NM_001387847.1	RGS8
chr1	183022142	183022379	GeneBody	NM_002293.4	LAMC1
chr1	183274105	183274220	Promoter	NM_170706.4	NMNAT2
chr1	183339078	183339218	GeneBody	NM_015039.4	NMNAT2
chr1	183368339	183368399	GeneBody	NM_015039.4	NMNAT2
chr1	183843561	183843841	GeneBody	NM_001297672.3,NM_001297671.3,NM_001297670.3,NM_015149.6,NM_001297669.3	RGL1
chr1	185447848	185448092	Intergenic	NA	NA
chr1	185839542	185839644	GeneBody	NM_031935.3	HMCN1
chr1	186248536	186248643	Intergenic	NA	NA
chr1	186738552	186738755	Intergenic	NA	NA
chr1	187609131	187609277	Intergenic	NA	NA
chr1	188234965	188235088	Intergenic	NA	NA
chr1	188235687	188235809	Intergenic	NA	NA
chr1	189826332	189826548	Intergenic	NA	NA
chr1	190648275	190648374	GeneBody	NR_033922.2	LINC01720
chr1	192515758	192515904	Intergenic	NA	NA
chr1	193191312	193191524	GeneBody	NM_024529.5	CDC73
chr1	193427691	193427875	Intergenic	NA	NA
chr1	193467447	193467509	Intergenic	NA	NA
chr1	193653624	193653793	Intergenic	NA	NA
chr1	194348078	194348172	Intergenic	NA	NA
chr1	194591902	194592005	Intergenic	NA	NA
chr1	194653292	194653347	Intergenic	NA	NA
chr1	195527506	195527729	Intergenic	NA	NA
chr1	195723538	195723691	Intergenic	NA	NA
chr1	195897298	195897429	Intergenic	NA	NA
chr1	195934618	195934712	Intergenic	NA	NA
chr1	196207367	196207583	GeneBody	NM_198503.5,NM_001287819.3,NM_001287820.3,NR_146058.2,NR_146057.2	KCNT2
chr1	196313352	196313493	GeneBody	NM_198503.5,NM_001287819.3,NM_001287820.3,NR_146058.2,NR_146057.2	KCNT2
chr1	196855817	196855912	Promoter	NM_001201551.2,NM_006684.5,NM_001201550.3	CFHR4
chr1	196946446	196946570	Promoter	NM_030787.4	CFHR5
chr1	197421201	197421426	GeneBody	NM_001193640.2,NM_001257966.2,NM_201253.3,NM_001257965.2,NR_047563.2,NR_047564.2	CRB1
chr1	197433256	197433438	GeneBody	NM_001193640.2,NM_001257966.2,NM_201253.3,NM_001257965.2,NR_047563.2,NR_047564.2	CRB1
chr1	198101568	198101798	Intergenic	NA	NA
chr1	198124604	198125058	Promoter	NM_133494.3	NEK7
chr1	198845760	198846012	GeneBody	NR_040073.1	MIR181A1HG
chr1	200002614	200002728	GeneBody	NM_003822.5,NM_205860.3	NR5A2
chr1	200044720	200044816	GeneBody	NM_001276464.2,NM_003822.5,NM_205860.3	NR5A2
chr1	200150069	200150172	Intergenic	NA	NA
chr1	200217917	200218092	Intergenic	NA	NA
chr1	200446718	200446738	Intergenic	NA	NA
chr1	200967477	200967740	GeneBody	NM_001252100.2,NM_001252102.2,NM_017596.4,NM_001252103.2	KIF21B
chr1	201016270	201016337	GeneBody	NM_000069.3	CACNA1S
chr1	201056728	201056877	GeneBody	NM_000069.3	CACNA1S
chr1	201136271	201136378	GeneBody	NM_001288564.2	TMEM9
chr1	201372947	201373151	GeneBody	NM_003281.4	TNNI1
chr1	201977902	201978203	Promoter	NM_004433.5,NM_001114309.2,NR_146472.1	ELF3,ELF3-AS1
chr1	201982191	201982577	GeneBody	NM_004433.5,NM_001114309.2	ELF3
chr1	201982813	201983216	GeneBody	NM_004433.5,NM_001114309.2	ELF3
chr1	201985957	201986070	GeneBody	NM_004433.5,NM_001114309.2	ELF3
chr1	202859881	202860018	Promoter	NM_002871.5	RABIF
chr1	203096152	203096276	Promoter	NM_001048230.2,NM_001365065.1,NM_001365066.1,NM_000674.3	ADORA1
chr1	203097876	203098163	Promoter	NM_001048230.2,NM_001365065.1,NM_001365066.1,NM_000674.3	ADORA1
chr1	203098225	203098463	Promoter	NM_001048230.2,NM_001365065.1,NM_001365066.1,NM_000674.3	ADORA1
chr1	203102901	203103153	GeneBody	NM_001048230.2,NM_001365065.1,NM_001365066.1,NM_000674.3	ADORA1
chr1	203117111	203117302	GeneBody	NM_001048230.2,NM_001365065.1,NM_001365066.1,NM_000674.3	ADORA1
chr1	203117539	203117603	GeneBody	NM_001048230.2,NM_001365065.1,NM_001365066.1,NM_000674.3	ADORA1
chr1	203483220	203483445	Intergenic	NA	NA
chr1	203579451	203579581	Intergenic	NA	NA
chr1	204315997	204316419	Promoter	RPL21P19	RPL21P19
chr1	204326678	204327010	GeneBody	NM_014935.5	PLEKHA6
chr1	204346544	204346896	Intergenic	NA	NA
chr1	204353917	204353926	Intergenic	NA	NA
chr1	204422335	204422674	GeneBody	NM_002646.4,NM_001377335.1,NM_001377334.1	PIK3C2B
chr1	205094106	205094251	Intergenic	NA	NA
chr1	205282490	205282790	GeneBody	NM_030952.3	NUAK2
chr1	205282873	205283135	GeneBody	NM_030952.3	NUAK2
chr1	205283220	205283499	GeneBody	NM_030952.3	NUAK2
chr1	205318633	205318768	Promoter	SNRPGP10	SNRPGP10
chr1	205377163	205377315	GeneBody	NM_001199050.2,NM_001001552.5,NM_001199051.2,NM_001199052.2,NR_037583.2	LEMD1
chr1	205442696	205442823	Promoter	rna-TRK-TTT8-1	TRK-TTT8-1
chr1	205860305	205860499	Promoter	NR_046098.1	LOC284581
chr1	207100574	207100879	Intergenic	NA	NA
chr1	207118184	207118482	Promoter	NM_002644.4	PIGR
chr1	207119482	207119515	Promoter	NM_002644.4	PIGR
chr1	207126004	207126193	Intergenic	NA	NA
chr1	207128534	207128705	Intergenic	NA	NA
chr1	207262892	207262984	Promoter	NM_001017367.1,NM_001017364.1,NM_000716.3,NM_001017366.3,NM_001017365.3	C4BPB
chr1	207772374	207772505	GeneBody	NM_000651.6	CR1
chr1	207926739	207926784	Promoter	NM_172361.3,NM_172357.3,NM_172350.3,NM_172353.3,NM_172352.3,NM_172356.3,NM_172355.3,NM_172358.3,NM_153826.4,NM_172351.3,NM_172359.3,NM_002389.4	CD46
chr1	207927043	207927229	Promoter	NM_172361.3,NM_172357.3,NM_172350.3,NM_172353.3,NM_172352.3,NM_172356.3,NM_172355.3,NM_172358.3,NM_153826.4,NM_172351.3,NM_172359.3,NM_002389.4	CD46
chr1	209462845	209463061	Intergenic	NA	NA
chr1	210010361	210010583	GeneBody	NM_014388.7	UTP25
chr1	210011958	210012115	GeneBody	NM_014388.7	UTP25
chr1	211089512	211089696	GeneBody	NM_172362.3,NM_002238.4	KCNH1
chr1	211780313	211780497	Intergenic	NA	NA
chr1	211984040	211984133	GeneBody	NM_001375842.1,NM_001320808.2,NM_001375845.1,NM_001375844.1,NM_001375841.1,NM_014873.3	LPGAT1
chr1	212340546	212340715	Intergenic	NA	NA
chr1	212838976	212839308	Intergenic	NA	NA
chr1	213770194	213770417	Intergenic	NA	NA
chr1	213935453	213935538	Intergenic	NA	NA
chr1	214037502	214037600	GeneBody	NR_037850.2	PROX1-AS1
chr1	214105164	214105483	GeneBody	NR_037850.2	PROX1-AS1
chr1	214158300	214158767	Promoter	NR_037850.2	PROX1-AS1
chr1	214250219	214250393	Intergenic	NA	NA
chr1	214361492	214361625	Intergenic	NA	NA
chr1	214523607	214523786	GeneBody	NM_005401.5	PTPN14
chr1	214688252	214688361	GeneBody	NM_005401.5	PTPN14
chr1	214698479	214698634	GeneBody	NM_005401.5	PTPN14
chr1	215742487	215742760	Promoter	NM_001319294.2,NM_016121.5,NM_001319295.2	KCTD3
chr1	216356849	216356931	GeneBody	NM_007123.6,NM_206933.4	USH2A
chr1	216939121	216939290	GeneBody	NM_001243514.2,NM_001243509.2,NM_001243507.2,NM_001350125.2,NM_001350123.2,NM_206594.3,NM_206595.3,NM_001243506.2,NM_001243505.2,NM_001350122.2,NM_001134285.3,NM_001350124.2,NM_001243510.3,NM_001243511.3,NM_001243512.1,NM_001243513.1	ESRRG
chr1	216939395	216939500	GeneBody	NM_001243514.2,NM_001243509.2,NM_001243507.2,NM_001350125.2,NM_001350123.2,NM_206594.3,NM_206595.3,NM_001243506.2,NM_001243505.2,NM_001350122.2,NM_001134285.3,NM_001350124.2,NM_001243510.3,NM_001243511.3,NM_001243512.1,NM_001243513.1	ESRRG
chr1	217310502	217310917	Promoter	NM_001134285.3,NM_001350124.2,NM_001243510.3,NM_001243511.3	ESRRG
chr1	217310941	217311373	Promoter	NM_001134285.3,NM_001350124.2,NM_001243510.3,NM_001243511.3	ESRRG
chr1	217311397	217311856	Promoter	NM_001134285.3,NM_001350124.2,NM_001243510.3,NM_001243511.3	ESRRG
chr1	217402292	217402375	Intergenic	NA	NA
chr1	217598201	217598316	Intergenic	NA	NA
chr1	218523304	218523729	GeneBody	NM_003238.6,NM_001135599.4,NR_138148.2,NR_138149.2	TGFB2
chr1	218593979	218594275	GeneBody	NM_003238.6,NM_001135599.4,NR_138148.2,NR_138149.2	TGFB2
chr1	218819952	218820105	Intergenic	NA	NA
chr1	219788454	219788596	Intergenic	NA	NA
chr1	219834377	219834684	Intergenic	NA	NA
chr1	220038111	220038295	Intergenic	NA	NA
chr1	220550749	220550906	Intergenic	NA	NA
chr1	220697118	220697170	Intergenic	NA	NA
chr1	220906200	220906310	Intergenic	NA	NA
chr1	220985831	220985966	GeneBody	NM_022746.4	MTARC1
chr1	221055558	221056021	GeneBody	NM_021958.4	HLX
chr1	221057235	221057622	GeneBody	NM_021958.4	HLX
chr1	221069426	221069908	Intergenic	NA	NA
chr1	221420022	221420058	Intergenic	NA	NA
chr1	221507128	221507484	GeneBody	NR_024236.1	LINC02817
chr1	221661223	221661333	Intergenic	NA	NA
chr1	221947666	221947871	Intergenic	NA	NA
chr1	222691535	222691633	Intergenic	NA	NA
chr1	223100174	223100256	Promoter	NM_001369594.1	DISP1
chr1	223184950	223185150	Intergenic	NA	NA
chr1	223856497	223856676	Intergenic	NA	NA
chr1	223927881	223928176	GeneBody	NM_001748.5,NM_001146068.2	CAPN2
chr1	224031963	224032108	Promoter	NM_005426.3,NM_001031685.3	TP53BP2
chr1	224060730	224061024	Intergenic	NA	NA
chr1	224372273	224372667	Promoter	NM_001321542.2,NM_003676.4,NM_001321541.2	DEGS1
chr1	224392068	224392139	Intergenic	NA	NA
chr1	224411937	224412106	GeneBody	NR_110668.1	LOC101927164
chr1	224412213	224412311	GeneBody	NR_110668.1	LOC101927164
chr1	225618186	225618337	Promoter	NM_194442.3	LBR
chr1	225650829	225651171	Intergenic	NA	NA
chr1	225669004	225669234	Intergenic	NA	NA
chr1	225838195	225838507	GeneBody	NM_001377481.1,NM_001377482.1,NM_001008493.3,NM_018212.6,NM_001377483.1	ENAH
chr1	225838798	225838929	Promoter	NM_001377481.1,NM_001377482.1,NM_001008493.3,NM_018212.6,NM_001377483.1	ENAH
chr1	226066954	226067079	GeneBody	NM_014698.3	TMEM63A
chr1	226168130	226168244	Intergenic	NA	NA
chr1	226288671	226289037	Intergenic	NA	NA
chr1	226862906	226863137	Promoter	NR_103784.1	ITPKB-IT1
chr1	227070442	227070629	GeneBody	NM_012486.3,NM_000447.3	PSEN2
chr1	227407036	227407283	GeneBody	NM_001387550.1,NM_001366019.2,NM_003607.4,NM_001366010.2,NM_014826.5,NM_001366011.1	CDC42BPA
chr1	227447157	227447301	GeneBody	NM_001387550.1,NM_001366019.2,NM_003607.4,NM_001366010.2,NM_014826.5,NM_001366011.1	CDC42BPA
chr1	227681579	227681752	Promoter	TUBB8P10	TUBB8P10
chr1	227746029	227746405	Intergenic	NA	NA
chr1	227746853	227747125	Promoter	RNA5SP77	RNA5SP77
chr1	227931925	227932185	GeneBody	NM_001323934.2,NM_053052.4,NM_001323931.2,NM_001323935.1,NM_001323930.2,NM_001323932.2,NM_001323933.2,NR_136657.2,NR_136656.2,NR_136655.2,NR_136654.2	SNAP47
chr1	228124886	228125141	GeneBody	NM_003395.4	WNT9A
chr1	228172744	228172867	Intergenic	NA	NA
chr1	228196299	228196784	Promoter	NM_033131.4	WNT3A
chr1	228555595	228555819	GeneBody	NM_001098623.2,NM_001271223.2,NM_001386125.1	OBSCN
chr1	228558714	228559074	GeneBody	NM_001098623.2,NM_001271223.2,NM_001386125.1	OBSCN
chr1	228559082	228559448	GeneBody	NM_001098623.2,NM_001271223.2,NM_001386125.1	OBSCN
chr1	228940805	228941139	Intergenic	NA	NA
chr1	228949330	228949550	Intergenic	NA	NA
chr1	229039252	229039382	Intergenic	NA	NA
chr1	229039557	229039701	Intergenic	NA	NA
chr1	229141691	229141896	Intergenic	NA	NA
chr1	229506133	229506290	Intergenic	NA	NA
chr1	229506414	229506496	Intergenic	NA	NA
chr1	229546335	229546577	Promoter	RN7SKP276	RN7SKP276
chr1	229566016	229566196	Intergenic	NA	NA
chr1	229706181	229706413	Promoter	HMGN2P19	HMGN2P19
chr1	230146821	230146997	Intergenic	NA	NA
chr1	230227547	230227673	GeneBody	NR_120373.2,NM_004481.5,NM_001291866.2	GALNT2
chr1	230242746	230242922	GeneBody	NM_004481.5,NM_001291866.2	GALNT2
chr1	230279753	230279904	GeneBody	NM_004481.5,NM_001291866.2	GALNT2
chr1	230285881	230285998	GeneBody	NM_004481.5,NM_001291866.2	GALNT2
chr1	230413285	230413487	GeneBody	NM_004481.5,NM_001291866.2	GALNT2
chr1	230435354	230435443	Intergenic	NA	NA
chr1	230435577	230435680	Intergenic	NA	NA
chr1	230594696	230594892	Intergenic	NA	NA
chr1	230685845	230686030	Intergenic	NA	NA
chr1	230878302	230878432	GeneBody	NM_001382817.3	AGT
chr1	230916063	230916344	GeneBody	NM_001319676.2,NM_016452.3,NM_006615.3	CAPN9
chr1	230992893	230993171	Promoter	NM_001136495.2	C1orf198
chr1	231113175	231113546	Promoter	NM_022786.3,NM_001346992.2,NR_144538.2,NM_024525.5,NM_001376510.1,NM_001376512.1,NM_001376507.1,NM_001376513.1,NM_001376508.1,NM_001376511.1,NM_001122835.3,NM_001376509.1,NM_001376514.1	ARV1,TTC13
chr1	231185205	231185359	Intergenic	NA	NA
chr1	231211406	231211437	Intergenic	NA	NA
chr1	231337590	231337734	GeneBody	NM_001300889.3,NM_001004342.5	TRIM67
chr1	231341741	231341769	GeneBody	NM_001300889.3,NM_001004342.5	TRIM67
chr1	231707723	231707905	GeneBody	NR_028399.1,NR_028400.1,NR_028398.1,NR_028396.1,NR_028397.1,NR_028395.1,NR_028394.1,NR_028393.1	TSNAX-DISC1
chr1	232089488	232089583	GeneBody	NM_001164546.2,NM_001164542.2,NM_001164547.2,NM_001164541.2,NM_001164538.2,NM_001164540.2,NM_001012957.2,NM_018662.3,NM_001164537.2,NR_028393.1	DISC1,TSNAX-DISC1
chr1	232148436	232148527	GeneBody	NM_001164540.2,NM_001012957.2,NM_018662.3,NM_001164537.2,NR_028393.1	DISC1,TSNAX-DISC1
chr1	232372657	232372667	Intergenic	NA	NA
chr1	232702195	232702260	GeneBody	NM_020808.5,NM_001377488.1	SIPA1L2
chr1	232724860	232724960	GeneBody	NM_020808.5,NM_001377488.1	SIPA1L2
chr1	233099219	233099417	GeneBody	NM_001329453.2,NM_032324.3,NM_001329452.2,NR_138027.2,NR_138025.2,NR_138028.2,NR_138026.2,NR_138024.2	NTPCR
chr1	233113946	233114047	GeneBody	NM_001329453.2,NM_032324.3,NM_001329452.2,NR_138027.2,NR_138025.2,NR_138028.2,NR_138026.2,NR_138024.2	NTPCR
chr1	234019342	234019446	Intergenic	NA	NA
chr1	234116957	234117302	GeneBody	NM_173508.4	SLC35F3
chr1	234838495	234838611	Intergenic	NA	NA
chr1	235252608	235252717	Intergenic	NA	NA
chr1	235314228	235314495	GeneBody	NM_015014.4,NM_001346738.2,NR_144490.2,NR_144492.2,NR_027762.3,NR_144491.2	RBM34
chr1	236164908	236165065	GeneBody	NM_002508.3	NID1
chr1	236525119	236525254	Intergenic	NA	NA
chr1	236636578	236636711	GeneBody	NM_080738.4,NM_145861.4	EDARADD
chr1	236924570	236924776	GeneBody	NM_001103.4,NM_001278343.2,NM_001278344.2	ACTN2
chr1	236937174	236937297	Intergenic	NA	NA
chr1	237922895	237923283	GeneBody	NM_001035.3	RYR2
chr1	238547771	238547977	Intergenic	NA	NA
chr1	238815910	238816197	Intergenic	NA	NA
chr1	238973285	238973336	Intergenic	NA	NA
chr1	240033573	240033772	GeneBody	NM_000740.4,NM_001375980.1,NM_001375985.1,NM_001375981.1,NM_001375984.1,NM_001375979.1,NM_001375983.1,NM_001375978.1,NM_001347716.2,NM_001375982.1,NR_164748.1	CHRM3
chr1	240249854	240249900	Intergenic	NA	NA
chr1	240286354	240286703	GeneBody	NM_001348094.2,NM_020066.5,NM_001305424.2	FMN2
chr1	240366695	240366830	GeneBody	NM_001348094.2,NM_020066.5,NM_001305424.2	FMN2
chr1	240559526	240559671	GeneBody	NM_001348094.2,NM_020066.5,NM_001305424.2	FMN2
chr1	240820226	240820419	Intergenic	NA	NA
chr1	241696178	241696495	Promoter	NM_003679.5	KMO
chr1	241853011	241853149	GeneBody	NM_001367482.1	WDR64
chr1	241995409	241995663	Promoter	RPL6P3	RPL6P3
chr1	242128334	242128481	Intergenic	NA	NA
chr1	242348356	242348500	GeneBody	NM_001195812.2,NM_001195811.2,NM_001372062.1,NM_001320272.2	PLD5
chr1	242366119	242366280	GeneBody	NM_001195812.2,NM_001195811.2,NM_001372062.1,NM_001320272.2	PLD5
chr1	242406489	242406563	GeneBody	NM_001195812.2,NM_001195811.2,NM_001372062.1,NM_001320272.2	PLD5
chr1	242433098	242433173	GeneBody	NM_001195812.2,NM_001195811.2,NM_001372062.1,NM_001320272.2	PLD5
chr1	242438203	242438377	GeneBody	NM_001195812.2,NM_001195811.2,NM_001372062.1,NM_001320272.2	PLD5
chr1	242494505	242494537	GeneBody	NM_001195812.2,NM_001195811.2,NM_001372062.1,NM_001320272.2	PLD5
chr1	242528845	242528952	Promoter	RPL10AP5	RPL10AP5
chr1	242612009	242612418	Promoter	NM_001195812.2,NM_001195811.2	PLD5
chr1	242622822	242623004	GeneBody	NM_001372062.1,NM_001320272.2	PLD5
chr1	242623159	242623250	GeneBody	NM_001372062.1,NM_001320272.2	PLD5
chr1	242623550	242623737	GeneBody	NM_001372062.1,NM_001320272.2	PLD5
chr1	243279611	243279891	Intergenic	NA	NA
chr1	243560205	243560479	GeneBody	NM_006642.5,NM_001350247.2,NM_001350246.2,NM_001350248.2,NM_001350251.2,NM_001350249.2	SDCCAG8
chr1	243575699	243575825	GeneBody	NM_006642.5,NM_001350247.2,NM_001350246.2,NM_001350248.2,NM_001350251.2,NM_001350249.2	SDCCAG8
chr1	243876785	243876934	GeneBody	NM_001206729.2,NM_005465.7,NM_001370074.1,NM_181690.2	AKT3
chr1	244213176	244213617	Promoter	NM_205768.3,NM_001278196.2	ZBTB18
chr1	244373491	244373667	Intergenic	NA	NA
chr1	244429941	244430036	Intergenic	NA	NA
chr1	244528014	244528085	GeneBody	NM_001276349.2,NM_001276348.2,NM_001012970.3	C1orf100
chr1	244528224	244528469	GeneBody	NM_001276349.2,NM_001276348.2,NM_001012970.3	C1orf100
chr1	244715939	244716017	GeneBody	NM_001242340.2,NM_173807.5,NM_001130957.2	CATSPERE
chr1	245452532	245452683	GeneBody	NM_018012.4	KIF26B
chr1	245461477	245461662	GeneBody	NM_018012.4	KIF26B
chr1	245470007	245470212	GeneBody	NM_018012.4	KIF26B
chr1	245622164	245622293	GeneBody	NM_018012.4	KIF26B
chr1	245646823	245647174	GeneBody	NM_018012.4	KIF26B
chr1	245651658	245651978	GeneBody	NM_018012.4	KIF26B
chr1	245662669	245662841	GeneBody	NM_018012.4	KIF26B
chr1	245854304	245854606	GeneBody	NM_018012.4	KIF26B
chr1	246146083	246146269	GeneBody	NM_001375966.1,NM_001375965.1,NM_001375963.1,NM_022743.3,NM_001167740.2,NM_001375962.1	SMYD3
chr1	246198567	246199029	GeneBody	NM_001375963.1,NM_022743.3,NM_001167740.2,NM_001375962.1	SMYD3
chr1	246374057	246374282	GeneBody	NM_001375963.1,NM_022743.3,NM_001167740.2,NM_001375962.1	SMYD3
chr1	246378352	246378509	GeneBody	NM_001375963.1,NM_022743.3,NM_001167740.2,NM_001375962.1	SMYD3
chr1	246736823	246736971	GeneBody	NM_001139459.2,NM_152609.3	CNST
chr1	246968579	246968675	Intergenic	NA	NA
chr1	247012941	247013201	GeneBody	NM_015446.5,NM_001323342.2,NM_001323343.2,NR_136586.2	AHCTF1
chr1	247843558	247843699	Promoter	NM_001005487.2	OR13G1
chr1	247934802	247934916	Intergenic	NA	NA
chr1	248533282	248533372	Intergenic	NA	NA
chr1	248861548	248861664	Promoter	NR_125950.1	LYPD9P
chr1	249176273	249176404	Intergenic	NA	NA
chr10	219876	219970	GeneBody	NM_001370109.2_2,NM_001370102.2_2,NM_001370101.2,NM_001370121.2,NM_001202464.3,NM_001370117.2,NM_001370123.2,NM_001370112.2,NM_001370100.5,NM_001370110.2,NM_001370111.2,NM_001370108.2,NM_001370114.2,NM_001370099.2,NM_212479.4,NM_001370124.3,NM_001370120.2,NM_001370116.2,NM_001202465.3,NM_001370122.2,NM_001202466.3,NM_001370106.2,NM_001370115.2,NM_001370097.3,NM_001330057.3,NM_001370107.2_2,NM_001…	ZMYND11
chr10	480853	480932	GeneBody	NM_014974.3	DIP2C
chr10	513972	514036	GeneBody	NM_014974.3	DIP2C
chr10	532127	532530	GeneBody	NM_014974.3	DIP2C
chr10	618680	619029	GeneBody	NM_014974.3	DIP2C
chr10	695843	695927	GeneBody	NM_014974.3	DIP2C
chr10	698069	698534	GeneBody	NM_014974.3	DIP2C
chr10	890614	890789	GeneBody	NM_015155.3,NM_001351277.2	LARP4B
chr10	890955	891101	GeneBody	NM_015155.3,NM_001351277.2	LARP4B
chr10	952315	952487	GeneBody	NM_015155.3,NM_001351277.2	LARP4B
chr10	990392	990635	Intergenic	NA	NA
chr10	990772	990831	Intergenic	NA	NA
chr10	992868	992933	Intergenic	NA	NA
chr10	1336094	1336171	GeneBody	NM_018702.4	ADARB2
chr10	1434739	1435106	GeneBody	NM_018702.4	ADARB2
chr10	1448572	1448618	GeneBody	NM_018702.4	ADARB2
chr10	1449722	1449997	GeneBody	NM_018702.4	ADARB2
chr10	1646535	1646629	GeneBody	NM_018702.4	ADARB2
chr10	1676527	1676660	GeneBody	NM_018702.4	ADARB2
chr10	1716465	1716584	GeneBody	NM_018702.4	ADARB2
chr10	1721870	1722095	GeneBody	NM_018702.4	ADARB2
chr10	1970949	1971052	Intergenic	NA	NA
chr10	2046946	2047031	Intergenic	NA	NA
chr10	2068404	2068551	Intergenic	NA	NA
chr10	2166435	2166743	Intergenic	NA	NA
chr10	2215431	2215501	Intergenic	NA	NA
chr10	2336967	2337065	Intergenic	NA	NA
chr10	2377835	2378062	Intergenic	NA	NA
chr10	2480512	2480626	Intergenic	NA	NA
chr10	2546911	2547172	Intergenic	NA	NA
chr10	2640679	2640834	Intergenic	NA	NA
chr10	2653215	2653346	Intergenic	NA	NA
chr10	3089261	3089420	Intergenic	NA	NA
chr10	3241715	3242202	Intergenic	NA	NA
chr10	3304186	3304334	Intergenic	NA	NA
chr10	3345338	3345494	Intergenic	NA	NA
chr10	3442415	3442522	GeneBody	NR_131187.1	LOC105376360
chr10	3558378	3558740	GeneBody	NR_131187.1	LOC105376360
chr10	3574858	3575183	GeneBody	NR_131187.1	LOC105376360
chr10	3627223	3627405	GeneBody	NR_131187.1	LOC105376360
chr10	3668691	3668925	GeneBody	NR_131187.1	LOC105376360
chr10	3678234	3678575	GeneBody	NR_131187.1	LOC105376360
chr10	3678923	3679259	GeneBody	NR_131187.1	LOC105376360
chr10	3679536	3679600	GeneBody	NR_131187.1	LOC105376360
chr10	3746773	3746885	GeneBody	NR_131187.1	LOC105376360
chr10	3761612	3761866	GeneBody	NR_131187.1	LOC105376360
chr10	3939317	3939431	Intergenic	NA	NA
chr10	4012352	4012408	Intergenic	NA	NA
chr10	4077105	4077175	Intergenic	NA	NA
chr10	4093392	4093464	Promoter	NR_120632.1	LOC101927964
chr10	4103705	4103851	GeneBody	NR_120632.1	LOC101927964
chr10	4244249	4244436	Intergenic	NA	NA
chr10	4426566	4426767	Promoter	NR_108055.1,NR_108054.1	LINC00703
chr10	4480425	4480711	Intergenic	NA	NA
chr10	4493432	4493596	Intergenic	NA	NA
chr10	4517159	4517354	Intergenic	NA	NA
chr10	4675405	4675622	Intergenic	NA	NA
chr10	4676016	4676115	Intergenic	NA	NA
chr10	4692827	4693005	GeneBody	NR_024475.1	MANCR
chr10	4700535	4700749	GeneBody	NR_015425.1,NR_024475.1	MANCR,LINC00705
chr10	4720610	4720662	Promoter	NR_024475.1	MANCR
chr10	4795413	4795435	Intergenic	NA	NA
chr10	4814262	4814354	Intergenic	NA	NA
chr10	4890354	4890687	Intergenic	NA	NA
chr10	5528212	5528446	Intergenic	NA	NA
chr10	5716963	5717027	Intergenic	NA	NA
chr10	5886675	5886912	Intergenic	NA	NA
chr10	5937664	5937848	Promoter	NM_032807.5	FBH1
chr10	5990978	5991227	Intergenic	NA	NA
chr10	6082146	6082350	GeneBody	NM_000417.3,NM_001308242.2,NM_001308243.2	IL2RA
chr10	6114650	6114812	Promoter	RPL32P23	RPL32P23
chr10	6125587	6126036	Intergenic	NA	NA
chr10	6159690	6159951	Intergenic	NA	NA
chr10	6193039	6193398	Promoter	NR_039698.2,NR_036111.1,RN7SKP78	RN7SKP78,MIR3155B,MIR3155A
chr10	6720207	6720386	Intergenic	NA	NA
chr10	6722616	6722802	Intergenic	NA	NA
chr10	6771956	6772121	Intergenic	NA	NA
chr10	6917555	6917792	Intergenic	NA	NA
chr10	7324603	7324740	GeneBody	NM_001387891.1,NM_001018039.1,NM_001387889.1,NM_001387890.1,NM_001029880.3	SFMBT2
chr10	7498284	7498446	Intergenic	NA	NA
chr10	7498551	7498611	Intergenic	NA	NA
chr10	7526429	7526601	Intergenic	NA	NA
chr10	7563940	7564128	Intergenic	NA	NA
chr10	7570665	7570971	Intergenic	NA	NA
chr10	7614113	7614179	GeneBody	NM_001001851.3,NM_032817.6,NM_030569.7	ITIH5
chr10	7648071	7648178	GeneBody	NM_001001851.3,NM_032817.6,NM_030569.7	ITIH5
chr10	7684321	7684556	GeneBody	NM_001001851.3,NM_030569.7	ITIH5
chr10	8094430	8094859	Promoter	NR_104336.1,NR_104327.1,NR_104329.1,NR_104330.1,NR_104328.1,NR_024256.1	GATA3-AS1
chr10	8105281	8105405	GeneBody	NM_002051.3,NM_001002295.2	GATA3
chr10	8107282	8107585	GeneBody	NM_002051.3,NM_001002295.2	GATA3
chr10	8179598	8179670	Intergenic	NA	NA
chr10	8192550	8192794	Intergenic	NA	NA
chr10	8314959	8315277	Intergenic	NA	NA
chr10	8370530	8370645	Intergenic	NA	NA
chr10	8442301	8442431	Intergenic	NA	NA
chr10	8670251	8670484	Intergenic	NA	NA
chr10	9424237	9424428	Intergenic	NA	NA
chr10	9776223	9776345	Intergenic	NA	NA
chr10	10006880	10006967	Intergenic	NA	NA
chr10	10096456	10096580	Intergenic	NA	NA
chr10	10524952	10525083	GeneBody	NM_001326317.2,NM_001326318.2,NM_001326321.2,NM_001326319.2,NM_001326320.2,NM_001326323.2	CELF2
chr10	10557703	10558135	GeneBody	NM_001326317.2,NM_001326318.2,NM_001326321.2,NM_001326319.2,NM_001326320.2,NM_001326323.2	CELF2
chr10	10606582	10606680	GeneBody	NM_001326317.2,NM_001326318.2,NM_001326321.2,NM_001326319.2,NM_001326320.2,NM_001326323.2	CELF2
chr10	11046203	11046432	Promoter	NM_001326338.2,NM_001326339.2,NM_001326333.2,NM_001326332.2,NM_001025077.3,NM_001326331.2,NM_001326337.2,NM_001326335.2,NM_001326336.2,NM_001326334.2,NM_001326329.2,NM_001326330.2	CELF2
chr10	11189599	11189924	GeneBody	NM_001326345.2,NM_001326344.2,NM_001326341.2,NM_006561.4,NM_001326342.2,NM_001326340.2,NM_001326343.2,NM_001326338.2,NM_001326339.2,NM_001326333.2,NM_001326332.2,NM_001025077.3,NM_001326331.2,NM_001326337.2,NM_001326335.2,NM_001326336.2,NM_001326334.2,NM_001326329.2,NM_001326330.2,NM_001326326.2,NM_001326327.2,NM_001326328.2,NM_001326324.2,NM_001326325.2,NM_001326317.2,NM_001326318.2,NM_001326321…	CELF2
chr10	11213281	11213395	GeneBody	NM_001326346.2,NM_001326348.2,NM_001326349.2,NM_001025076.2,NM_001083591.1,NM_001326347.1,NM_001326345.2,NM_001326344.2,NM_001326341.2,NM_006561.4,NM_001326342.2,NM_001326340.2,NM_001326343.2,NM_001326338.2,NM_001326339.2,NM_001326333.2,NM_001326332.2,NM_001025077.3,NM_001326331.2,NM_001326337.2,NM_001326335.2,NM_001326336.2,NM_001326334.2,NM_001326329.2,NM_001326330.2,NM_001326326.2,NM_001326327…	CELF2
chr10	11246440	11246906	GeneBody	NM_001326346.2,NM_001326348.2,NM_001326349.2,NM_001025076.2,NM_001083591.1,NM_001326347.1,NM_001326345.2,NM_001326344.2,NM_001326341.2,NM_006561.4,NM_001326342.2,NM_001326340.2,NM_001326343.2,NM_001326338.2,NM_001326339.2,NM_001326333.2,NM_001326332.2,NM_001025077.3,NM_001326331.2,NM_001326337.2,NM_001326335.2,NM_001326336.2,NM_001326334.2,NM_001326329.2,NM_001326330.2,NM_001326326.2,NM_001326327…	CELF2
chr10	11265599	11265758	GeneBody	NM_001326346.2,NM_001326348.2,NM_001326349.2,NM_001025076.2,NM_001083591.1,NM_001326347.1,NM_001326345.2,NM_001326344.2,NM_001326341.2,NM_006561.4,NM_001326342.2,NM_001326340.2,NM_001326343.2,NM_001326338.2,NM_001326339.2,NM_001326333.2,NM_001326332.2,NM_001025077.3,NM_001326331.2,NM_001326337.2,NM_001326335.2,NM_001326336.2,NM_001326334.2,NM_001326329.2,NM_001326330.2,NM_001326326.2,NM_001326327…	CELF2
chr10	11644961	11645249	GeneBody	NR_125732.2,NM_014688.4	USP6NL
chr10	11730979	11731133	Intergenic	NA	NA
chr10	11731269	11731626	Intergenic	NA	NA
chr10	11879576	11879948	GeneBody	NM_153256.4	PROSER2
chr10	11952172	11952588	Intergenic	NA	NA
chr10	12383079	12383234	Intergenic	NA	NA
chr10	12439424	12439646	GeneBody	NM_001351032.2,NM_020397.4,NM_153498.4	CAMK1D
chr10	12503833	12504070	GeneBody	NM_001351032.2,NM_020397.4,NM_153498.4	CAMK1D
chr10	12648096	12648429	GeneBody	NM_001351032.2,NM_020397.4,NM_153498.4	CAMK1D
chr10	12914694	12914935	Intergenic	NA	NA
chr10	12946991	12947208	GeneBody	NM_031455.4,NM_001282658.2	CCDC3
chr10	13042705	13043144	Promoter	NM_031455.4	CCDC3
chr10	13313538	13313977	Intergenic	NA	NA
chr10	13442095	13442212	Intergenic	NA	NA
chr10	13495943	13496194	GeneBody	NM_001100912.2,NM_001378150.1,NM_001387359.1,NM_001378151.1,NM_001370075.2,NM_001378149.1,NM_001369863.1,NM_152751.3	BEND7
chr10	13533984	13534233	GeneBody	NM_001100912.2,NM_001378150.1,NM_001387359.1,NM_001378151.1,NM_001370075.2,NM_001378149.1,NM_001369863.1,NM_152751.3	BEND7
chr10	13546639	13546765	Promoter	NM_001100912.2,NM_152751.3	BEND7
chr10	13737679	13737997	GeneBody	NM_001318338.2,NM_001318337.2,NM_001318336.2,NM_018027.5	FRMD4A
chr10	13738053	13738392	GeneBody	NM_001318338.2,NM_001318337.2,NM_001318336.2,NM_018027.5	FRMD4A
chr10	13928632	13928905	GeneBody	NM_001318337.2,NM_001318336.2,NM_018027.5	FRMD4A
chr10	13968030	13968094	GeneBody	NM_001318337.2,NM_001318336.2,NM_018027.5	FRMD4A
chr10	13971009	13971088	GeneBody	NM_001318337.2,NM_001318336.2,NM_018027.5	FRMD4A
chr10	14029518	14029803	GeneBody	NM_001318336.2,NM_018027.5	FRMD4A
chr10	14032584	14032881	GeneBody	NM_001318336.2,NM_018027.5	FRMD4A
chr10	14083524	14083706	GeneBody	NM_018027.5	FRMD4A
chr10	14084044	14084198	GeneBody	NM_018027.5	FRMD4A
chr10	14130885	14131026	GeneBody	NM_018027.5,NR_134578.2	FRMD4A
chr10	14243129	14243355	GeneBody	NM_018027.5,NR_134578.2	FRMD4A
chr10	14369836	14369965	GeneBody	NM_018027.5,NR_134578.2	FRMD4A
chr10	14603285	14603616	GeneBody	NM_001320736.2,NM_001282698.2,NM_001282702.2,NM_001282701.2,NM_001282699.1,NM_001320737.1,NM_001282703.1,NM_001320735.2,NM_001282700.2,NM_001282696.2,NM_001282697.2,NM_001282695.2,NM_031453.4	FAM107B
chr10	14620377	14620675	GeneBody	NM_001282696.2,NM_001282697.2,NM_001282695.2,NM_031453.4	FAM107B
chr10	14620825	14621106	GeneBody	NM_001282696.2,NM_001282697.2,NM_001282695.2,NM_031453.4	FAM107B
chr10	14778938	14779130	GeneBody	NM_001282695.2,NM_031453.4	FAM107B
chr10	14850801	14851296	Intergenic	NA	NA
chr10	15032710	15032996	Intergenic	NA	NA
chr10	15033930	15034179	Intergenic	NA	NA
chr10	15034291	15034507	Intergenic	NA	NA
chr10	15034623	15034977	Intergenic	NA	NA
chr10	15035042	15035359	Intergenic	NA	NA
chr10	15035784	15036129	Intergenic	NA	NA
chr10	15036249	15036606	Intergenic	NA	NA
chr10	15073881	15073972	GeneBody	NR_144469.1,NR_144471.1	DCLRE1CP1,ACBD7-DCLRE1CP1
chr10	15074142	15074338	GeneBody	NR_144469.1,NR_144471.1	DCLRE1CP1,ACBD7-DCLRE1CP1
chr10	15077210	15077322	Promoter	NR_144469.1	DCLRE1CP1
chr10	15199415	15199488	GeneBody	NM_001308295.2,NM_004808.3	NMT2
chr10	15280956	15281193	GeneBody	NM_001010924.2	FAM171A1
chr10	15356657	15357011	GeneBody	NM_001010924.2	FAM171A1
chr10	15411453	15411548	Promoter	NM_001010924.2	FAM171A1
chr10	15427938	15428132	Intergenic	NA	NA
chr10	15514214	15514363	Intergenic	NA	NA
chr10	15547340	15547413	Intergenic	NA	NA
chr10	15649676	15649775	GeneBody	NM_003638.3,NM_001291494.2	ITGA8
chr10	16116369	16116477	Intergenic	NA	NA
chr10	16150650	16150750	Intergenic	NA	NA
chr10	16935727	16935985	GeneBody	NM_001081.4	CUBN
chr10	16991939	16992264	GeneBody	NM_001081.4	CUBN
chr10	17851954	17851979	Intergenic	NA	NA
chr10	17879001	17879103	Intergenic	NA	NA
chr10	18453568	18453790	GeneBody	NM_201597.3,NM_201593.3,NM_201596.3,NM_201572.4,NM_001167945.2,NM_201571.4	CACNB2
chr10	18586690	18586860	GeneBody	NM_001330060.2,NM_000724.4,NM_201597.3,NM_201593.3,NM_201596.3,NM_201572.4,NM_001167945.2,NM_201571.4	CACNB2
chr10	18593526	18593782	GeneBody	NM_001330060.2,NM_000724.4,NM_201597.3,NM_201593.3,NM_201596.3,NM_201572.4,NM_001167945.2,NM_201571.4	CACNB2
chr10	18738606	18738700	GeneBody	NM_201570.3,NM_201590.3,NM_001330060.2,NM_000724.4,NM_201597.3,NM_201593.3,NM_201596.3,NM_201572.4,NM_001167945.2,NM_201571.4	CACNB2
chr10	20563356	20563551	GeneBody	NM_001282736.2,NM_032812.9	PLXDC2
chr10	20659364	20659525	Intergenic	NA	NA
chr10	20683658	20683917	Intergenic	NA	NA
chr10	20695586	20695676	Intergenic	NA	NA
chr10	20761079	20761231	Intergenic	NA	NA
chr10	21064171	21064288	Intergenic	NA	NA
chr10	21452639	21452960	GeneBody	NM_001377323.1,NM_001377325.1,NM_001377324.1,NM_001377322.1,NM_001173484.2,NM_213569.2,NM_001377328.1,NM_001377327.1,NM_001377326.1	NEBL
chr10	21463949	21464361	Promoter	NR_046284.1,NR_046283.1,NM_001377324.1,NM_001377322.1,NM_001173484.2,NM_213569.2,NM_001377328.1	NEBL,NEBL-AS1
chr10	21470932	21471127	GeneBody	NM_001377327.1,NM_001377326.1	NEBL
chr10	21639269	21639352	GeneBody	NR_155751.1	LINC02643
chr10	22422724	22422887	Intergenic	NA	NA
chr10	22566844	22567117	Intergenic	NA	NA
chr10	22752790	22752892	Intergenic	NA	NA
chr10	22904805	22905267	GeneBody	NM_001330062.2,NM_005028.5	PIP4K2A
chr10	22922558	22922934	GeneBody	NM_001330062.2,NM_005028.5	PIP4K2A
chr10	22944568	22944972	GeneBody	NM_001330062.2,NM_005028.5	PIP4K2A
chr10	23897649	23897878	Intergenic	NA	NA
chr10	24199622	24199707	GeneBody	NM_001098500.3	KIAA1217
chr10	25051601	25051819	Intergenic	NA	NA
chr10	25138116	25138197	GeneBody	NM_020200.7,NM_001282786.2	PRTFDC1
chr10	25140471	25140574	GeneBody	NM_020200.7,NM_001282786.2	PRTFDC1
chr10	25140696	25140919	GeneBody	NM_020200.7,NM_001282786.2	PRTFDC1
chr10	25186541	25186690	GeneBody	NM_020200.7,NM_001282786.2	PRTFDC1
chr10	25403779	25404026	Promoter	NR_120649.1	LINC01516
chr10	25540601	25540754	GeneBody	NM_020752.3	GPR158
chr10	25785221	25785322	GeneBody	NM_020752.3	GPR158
chr10	25793514	25793654	GeneBody	NM_020752.3	GPR158
chr10	25796915	25796993	GeneBody	NM_020752.3	GPR158
chr10	26421069	26421165	GeneBody	NM_017433.5	MYO3A
chr10	27968328	27968505	GeneBody	NM_173576.3,NM_001242702.2	MKX
chr10	27978093	27978186	GeneBody	NM_173576.3,NM_001242702.2	MKX
chr10	28035630	28035915	Promoter	NM_173576.3,NM_001242702.2	MKX
chr10	28035949	28036253	Promoter	NM_173576.3,NM_001242702.2	MKX
chr10	28037680	28037930	GeneBody	NR_121652.1	MKX-AS1
chr10	28042493	28042585	GeneBody	NR_121652.1	MKX-AS1
chr10	28042708	28042776	GeneBody	NR_121652.1	MKX-AS1
chr10	28065272	28065421	Intergenic	NA	NA
chr10	28086110	28086206	Intergenic	NA	NA
chr10	28150971	28151057	GeneBody	NM_001290021.2,NM_001312689.2,NM_001290020.2,NM_018076.5	ODAD2
chr10	28490948	28491049	GeneBody	NM_173496.5,NM_001318170.2,NR_134517.2,NR_134518.2	MPP7
chr10	28503381	28503586	GeneBody	NM_173496.5,NM_001318170.2,NR_134517.2,NR_134518.2	MPP7
chr10	28542113	28542367	GeneBody	NM_173496.5,NM_001318170.2,NR_134517.2,NR_134518.2	MPP7
chr10	28552542	28552698	GeneBody	NM_173496.5,NM_001318170.2,NR_134517.2,NR_134518.2	MPP7
chr10	28734624	28734736	GeneBody	NR_134496.1	LINC02652
chr10	29041127	29041298	GeneBody	NR_120652.1	LINC01517
chr10	29390916	29391114	Intergenic	NA	NA
chr10	29676695	29676916	Intergenic	NA	NA
chr10	29843658	29843904	GeneBody	NM_003174.3,NM_001323600.1,NM_021738.3,NM_001323599.2	SVIL
chr10	29877482	29877624	GeneBody	NM_003174.3,NM_001323600.1,NM_021738.3,NM_001323599.2	SVIL
chr10	30318971	30319126	GeneBody	NM_001350001.2,NM_020848.4,NM_001350022.2,NM_001350021.2	JCAD
chr10	30475616	30475879	Intergenic	NA	NA
chr10	30504731	30504893	GeneBody	NR_120653.1	LOC101929279
chr10	30527640	30528046	Intergenic	NA	NA
chr10	30842932	30843152	Promoter	RN7SL63P	RN7SL63P
chr10	30915748	30916013	GeneBody	NM_183058.3	LYZL2
chr10	30994159	30994287	GeneBody	NR_036438.1	SVIL2P
chr10	31063959	31064100	Intergenic	NA	NA
chr10	31080108	31080319	Intergenic	NA	NA
chr10	31101532	31101790	Intergenic	NA	NA
chr10	31121799	31122009	Intergenic	NA	NA
chr10	31426360	31426447	Intergenic	NA	NA
chr10	31939042	31939074	Intergenic	NA	NA
chr10	31966794	31967078	Intergenic	NA	NA
chr10	31967583	31967780	Intergenic	NA	NA
chr10	31995875	31996080	Intergenic	NA	NA
chr10	31996257	31996414	Intergenic	NA	NA
chr10	32035828	32035932	Intergenic	NA	NA
chr10	32070041	32070118	Intergenic	NA	NA
chr10	32186745	32186859	GeneBody	NM_001270699.1,NM_018287.7,NM_001270696.2,NM_001270698.2,NM_001270695.1,NM_001270697.1	ARHGAP12
chr10	32266388	32266626	Intergenic	NA	NA
chr10	32413993	32414142	Intergenic	NA	NA
chr10	32519130	32519552	Promoter	RPS24P13	RPS24P13
chr10	33239779	33239964	GeneBody	NM_133376.3,NM_002211.4	ITGB1
chr10	33411014	33411291	Intergenic	NA	NA
chr10	33605015	33605178	GeneBody	NM_001024628.3,NM_001024629.3,NM_003873.7,NM_001330068.2,NM_001244972.2,NM_001244973.2,NR_045259.2	NRP1
chr10	33723756	33723954	Intergenic	NA	NA
chr10	33854948	33855118	Intergenic	NA	NA
chr10	34021248	34021422	Intergenic	NA	NA
chr10	34461906	34462126	GeneBody	NM_019619.4,NM_001184787.2,NM_001184785.2,NM_001184786.2,NM_001184788.2,NM_001184789.2,NM_001184791.2,NM_001184790.2	PARD3
chr10	34979604	34980006	GeneBody	NM_001184792.2,NM_001184793.2,NM_001184794.2,NM_019619.4,NM_001184787.2,NM_001184785.2,NM_001184786.2,NM_001184788.2,NM_001184789.2,NM_001184791.2,NM_001184790.2	PARD3
chr10	35113282	35113434	Intergenic	NA	NA
chr10	35130477	35130530	Intergenic	NA	NA
chr10	35852384	35852507	GeneBody	NM_001282852.2,NM_001282854.2,NM_145012.6,NM_001282853.2,NM_181698.4	CCNY
chr10	35979451	35979549	Intergenic	NA	NA
chr10	36000228	36000400	Intergenic	NA	NA
chr10	36476957	36477263	Intergenic	NA	NA
chr10	36662592	36662689	Intergenic	NA	NA
chr10	38979371	38979467	GeneBody	SLC9B1P3	SLC9B1P3
chr10	43136399	43136507	Intergenic	NA	NA
chr10	43434442	43434935	Intergenic	NA	NA
chr10	43447339	43447740	Intergenic	NA	NA
chr10	43447831	43448161	Intergenic	NA	NA
chr10	43724229	43724640	Promoter	NM_001282862.2	RASGEF1A
chr10	43832943	43833252	Intergenic	NA	NA
chr10	43899954	43900133	GeneBody	NM_001098206.2,NM_001098205.2,NM_004966.4,NM_001098204.2	HNRNPF
chr10	43900264	43900495	GeneBody	NM_001098206.2,NM_001098205.2,NM_004966.4,NM_001098204.2	HNRNPF
chr10	43900825	43901103	GeneBody	NM_001098206.2,NM_001098205.2,NM_004966.4,NM_001098204.2	HNRNPF
chr10	44081470	44081598	Intergenic	NA	NA
chr10	44090496	44090691	Intergenic	NA	NA
chr10	44197833	44198207	Intergenic	NA	NA
chr10	44210655	44210919	Intergenic	NA	NA
chr10	44274106	44274287	Promoter	NR_134484.1,NR_134483.1	LINC02658
chr10	44296758	44296968	Intergenic	NA	NA
chr10	44542713	44543183	Intergenic	NA	NA
chr10	44705746	44705967	Intergenic	NA	NA
chr10	44847912	44848039	Intergenic	NA	NA
chr10	45124203	45124349	Intergenic	NA	NA
chr10	45365585	45365633	GeneBody	NR_033842.1	TMEM72-AS1
chr10	45721578	45721624	Intergenic	NA	NA
chr10	46964959	46965234	GeneBody	NM_031912.5_2,NM_181519.3_2,NR_155739.1_2	LOC101927699,SYT15
chr10	47013856	47014129	Intergenic	NA	NA
chr10	47959516	47959747	Intergenic	NA	NA
chr10	48402406	48402507	Intergenic	NA	NA
chr10	48402723	48402926	Intergenic	NA	NA
chr10	48430283	48430705	GeneBody	NM_004962.5_2	GDF10
chr10	48587338	48587373	Intergenic	NA	NA
chr10	49688860	49689062	GeneBody	NM_001256026.2,NM_001256024.2,NM_021226.4,NM_001347735.2,NM_001256025.3,NM_001347738.2,NR_144643.2,NR_144642.2,NR_144645.2,NR_144646.2,NR_144644.2,NR_045675.2	ARHGAP22
chr10	49909733	49909845	GeneBody	NM_020945.2,NM_001370154.1,NM_001370153.1	WDFY4
chr10	50257904	50257997	GeneBody	NM_001031746.5	VSTM4
chr10	50366465	50366812	GeneBody	NM_001288743.3,NM_001353330.2,NM_001288740.3,NM_001353331.2,NM_001010863.4,NM_001288742.3,NM_001288741.3	TMEM273
chr10	50397502	50397743	Promoter	NM_001288743.3,NM_001353330.2,NM_001288740.3,NM_001353331.2,NM_001010863.4,NM_001288742.3,NM_001288741.3	TMEM273
chr10	50419528	50419624	Intergenic	NA	NA
chr10	50463004	50463066	Intergenic	NA	NA
chr10	50483209	50483262	Intergenic	NA	NA
chr10	50506657	50506911	Promoter	NM_001135196.2,NR_108038.1	C10orf71-AS1,C10orf71
chr10	50520445	50520810	GeneBody	NM_001135196.2	C10orf71
chr10	50532846	50532969	GeneBody	NM_001135196.2	C10orf71
chr10	50536262	50536426	Intergenic	NA	NA
chr10	50537235	50537419	Intergenic	NA	NA
chr10	51006420	51006583	Intergenic	NA	NA
chr10	51861049	51861275	GeneBody	NM_001330102.2_2,NM_001291398.2_2,NM_001005751.3_2	WASHC2A
chr10	52426589	52426646	Intergenic	NA	NA
chr10	52439548	52439832	GeneBody	NUTM2HP	NUTM2HP
chr10	52794794	52794860	GeneBody	NM_001098512.3	PRKG1
chr10	52806298	52806425	GeneBody	NM_001098512.3	PRKG1
chr10	53548345	53548508	GeneBody	NM_001374782.1,NM_006258.4,NM_001098512.3	PRKG1
chr10	55190956	55191080	Intergenic	NA	NA
chr10	55965789	55966116	GeneBody	NM_001354430.2,NM_001142763.2,NM_001142764.2,NM_033056.4,NM_001142766.2,NM_001142765.2,NM_001142767.2,NM_001142768.2,NM_001142773.2,NM_001354404.2,NM_001142769.3,NM_001354411.2,NM_001142770.3,NM_001142771.2,NM_001142772.2,NM_001384140.1,NM_001354429.2,NM_001354420.2	PCDH15
chr10	56193742	56193765	GeneBody	NM_001354430.2,NM_001142763.2,NM_001142764.2,NM_033056.4,NM_001142766.2,NM_001142765.2,NM_001142767.2,NM_001142768.2,NM_001142773.2,NM_001354404.2,NM_001142769.3,NM_001354411.2,NM_001142770.3,NM_001142771.2,NM_001142772.2,NM_001384140.1,NM_001354429.2,NM_001354420.2	PCDH15
chr10	57770073	57770266	Intergenic	NA	NA
chr10	59448466	59448557	Intergenic	NA	NA
chr10	59800335	59800387	Intergenic	NA	NA
chr10	60651530	60651609	Intergenic	NA	NA
chr10	60680861	60680980	Intergenic	NA	NA
chr10	61613899	61614031	GeneBody	NM_005436.5	CCDC6
chr10	61810359	61810554	GeneBody	NM_001149.4,NM_020987.5,NM_001320874.2,NM_001204404.2,NM_001204403.2	ANK3
chr10	61811245	61811275	GeneBody	NM_001149.4,NM_020987.5,NM_001320874.2,NM_001204404.2,NM_001204403.2	ANK3
chr10	61898543	61898596	Promoter	NM_001149.4	ANK3
chr10	61900254	61900412	Promoter	NM_001149.4	ANK3
chr10	61900538	61900618	Promoter	NM_001149.4	ANK3
chr10	61970092	61970270	GeneBody	NM_020987.5,NM_001320874.2,NM_001204404.2,NM_001204403.2	ANK3
chr10	61984141	61984217	GeneBody	NM_020987.5,NM_001320874.2,NM_001204404.2,NM_001204403.2	ANK3
chr10	62148737	62148843	Promoter	NM_020987.5,NM_001320874.2	ANK3
chr10	62822711	62822765	Intergenic	NA	NA
chr10	63701083	63701251	GeneBody	NM_032199.3	ARID5B
chr10	63796550	63796809	GeneBody	NM_032199.3	ARID5B
chr10	63805574	63805716	GeneBody	NM_032199.3	ARID5B
chr10	63835191	63835543	GeneBody	NM_001244638.2,NM_032199.3	ARID5B
chr10	64259922	64260054	Intergenic	NA	NA
chr10	64382890	64383040	Intergenic	NA	NA
chr10	64417008	64417259	Intergenic	NA	NA
chr10	65363852	65364002	GeneBody	NM_001001330.3	REEP3
chr10	65649695	65649844	Intergenic	NA	NA
chr10	65871452	65871787	Intergenic	NA	NA
chr10	66584425	66584585	Promoter	NR_001446.2	ANXA2P3
chr10	68581992	68582128	GeneBody	NM_001127384.3,NM_013266.4	CTNNA3
chr10	69612341	69612601	Intergenic	NA	NA
chr10	69916439	69916534	Promoter	RN7SKP202	RN7SKP202
chr10	70275846	70276065	GeneBody	NM_001324313.2,NM_001324312.2,NM_001324315.1,NM_001324314.2,NM_152707.4,NM_001324317.2,NR_136737.1	SLC25A16
chr10	70289644	70289850	Intergenic	NA	NA
chr10	70411604	70411844	GeneBody	NM_030625.3	TET1
chr10	70636723	70636914	GeneBody	NM_001130160.3,NM_001130159.3,NM_152709.5,NM_001130161.4	STOX1
chr10	70717211	70717364	Promoter	NM_001256910.2,NM_004728.4	DDX21
chr10	70821303	70821735	Intergenic	NA	NA
chr10	70975301	70975463	GeneBody	NR_120648.1	LOC101928994
chr10	71339532	71339667	Intergenic	NA	NA
chr10	71517498	71517794	Intergenic	NA	NA
chr10	71590456	71590686	GeneBody	NM_001368896.1,NM_080798.4,NM_001368898.1,NM_001368895.1,NM_001368897.1,NM_080805.4,NM_001368885.1,NM_001368883.1,NM_001368886.1,NM_080800.4,NM_080802.4,NM_080801.4,NM_001130103.2,NM_001368884.1,NM_001320951.2,NM_001368882.1	COL13A1
chr10	72010571	72010699	GeneBody	NM_022146.5	NPFFR1
chr10	72375740	72375852	Intergenic	NA	NA
chr10	72421549	72421780	Intergenic	NA	NA
chr10	72811899	72812187	Intergenic	NA	NA
chr10	72888428	72888646	Intergenic	NA	NA
chr10	73496682	73496902	Promoter	NM_001168390.2	C10orf105
chr10	73565825	73566227	GeneBody	NM_001171934.1,NM_001171933.1,NM_022124.6	CDH23
chr10	74210132	74210295	GeneBody	NM_001195519.2,NM_001363513.2,NM_006077.4,NM_001195518.2	MICU1
chr10	75549185	75549389	GeneBody	NM_001242488.2,NM_001242487.2,NM_001367799.1,NM_015037.4,NR_160292.1	ZSWIM8
chr10	75832384	75832578	GeneBody	NM_014000.3,NM_003373.4	VCL
chr10	76042091	76042247	GeneBody	NM_001202449.2,NM_001369124.1,NM_001123.4,NM_001202450.2,NM_001369123.1,NM_006721.4	ADK
chr10	76526438	76526582	Intergenic	NA	NA
chr10	77107081	77107201	GeneBody	NR_038224.1,NR_038225.1,NR_038223.1,NR_038226.1,NR_120651.2	ZNF503,ZNF503-AS1
chr10	77210547	77210616	GeneBody	NM_001305581.2	LRMDA
chr10	77273453	77273527	GeneBody	NM_001305581.2	LRMDA
chr10	77467779	77468031	GeneBody	NM_001305581.2,NR_131178.2	LRMDA
chr10	77468191	77468347	GeneBody	NM_001305581.2,NR_131178.2	LRMDA
chr10	77743703	77744095	GeneBody	NM_032024.5,NM_001305581.2,NR_131178.2	LRMDA
chr10	77814258	77814528	GeneBody	NM_032024.5,NM_001305581.2,NR_131178.2	LRMDA
chr10	77887950	77888048	GeneBody	NM_032024.5,NM_001305581.2,NR_131178.2	LRMDA
chr10	78005920	78006098	GeneBody	NM_032024.5,NM_001305581.2,NR_131178.2	LRMDA
chr10	78042405	78042613	GeneBody	NM_032024.5,NM_001305581.2,NR_131178.2	LRMDA
chr10	78156107	78156194	GeneBody	NM_032024.5,NM_001305581.2,NR_131178.2	LRMDA
chr10	78191580	78191729	GeneBody	NM_032024.5,NM_001305581.2,NR_131178.2	LRMDA
chr10	78193151	78193392	GeneBody	NM_032024.5,NM_001305581.2,NR_131178.2	LRMDA
chr10	78235904	78236034	GeneBody	NM_032024.5,NM_001305581.2,NR_131178.2	LRMDA
chr10	78576636	78576752	Intergenic	NA	NA
chr10	78638983	78639165	GeneBody	NM_001322838.2,NM_001322830.2,NM_001322835.2,NM_001014797.3,NM_001322829.2,NM_001322832.2,NM_001271518.2	KCNMA1
chr10	78662704	78662764	GeneBody	NR_120655.1,NM_001322837.2,NM_001271519.2,NM_001322836.2,NM_001161352.2,NM_001161353.2,NM_002247.4,NM_001322838.2,NM_001322830.2,NM_001322835.2,NM_001014797.3,NM_001322829.2,NM_001322832.2,NM_001271518.2	KCNMA1,KCNMA1-AS1
chr10	78704554	78704717	GeneBody	NR_120655.1,NM_001322837.2,NM_001271519.2,NM_001322836.2,NM_001161352.2,NM_001161353.2,NM_002247.4,NM_001322838.2,NM_001322830.2,NM_001322835.2,NM_001014797.3,NM_001322829.2,NM_001322832.2,NM_001271518.2	KCNMA1,KCNMA1-AS1
chr10	79093518	79093629	GeneBody	NM_001322837.2,NM_001271519.2,NM_001322836.2,NM_001161352.2,NM_001161353.2,NM_002247.4,NM_001322838.2,NM_001322830.2,NM_001322835.2,NM_001014797.3,NM_001322829.2,NM_001322832.2,NM_001271518.2	KCNMA1
chr10	79314753	79314843	GeneBody	NM_001322837.2,NM_001271519.2,NM_001322836.2,NM_001161352.2,NM_001161353.2,NM_002247.4,NM_001322830.2,NM_001322835.2,NM_001014797.3,NM_001322829.2,NM_001322832.2,NM_001271518.2	KCNMA1
chr10	80352539	80352720	Intergenic	NA	NA
chr10	81269849	81269919	Promoter	NR_136625.1,NR_136624.1	LOC729815
chr10	81466370	81466658	GeneBody	NM_001278495.2,NR_120613.1	NUTM2B-AS1,NUTM2B
chr10	81470909	81471013	GeneBody	NM_001278495.2,NR_120613.1	NUTM2B-AS1,NUTM2B
chr10	81480884	81480961	GeneBody	NR_120613.1	NUTM2B-AS1
chr10	81604501	81604789	GeneBody	NM_001355263.2	NUTM2E
chr10	81634812	81635024	Promoter	CTSLP6	CTSLP6
chr10	81947224	81947496	GeneBody	NM_001278408.2,NM_145869.2,NM_001278409.2,NM_145868.2,NM_001157.3,NM_001278407.2	ANXA11
chr10	82129113	82129338	Intergenic	NA	NA
chr10	82268806	82269251	GeneBody	NM_001351271.2,NM_001351272.2,NM_001351269.2,NM_001351270.2,NM_001128309.3,NM_030927.4,NM_001351266.2,NM_001351268.2,NM_001351267.4	TSPAN14
chr10	82269356	82269640	GeneBody	NM_001351271.2,NM_001351272.2,NM_001351269.2,NM_001351270.2,NM_001128309.3,NM_030927.4,NM_001351266.2,NM_001351268.2,NM_001351267.4	TSPAN14
chr10	82829476	82829641	Intergenic	NA	NA
chr10	83403185	83403319	Intergenic	NA	NA
chr10	84462358	84462485	GeneBody	NM_001165973.2,NM_001165972.1,NM_001370081.1,NM_001010848.4,NM_001370084.1,NM_001370082.1,NR_163253.1,NR_163252.1,NR_163251.1	NRG3
chr10	86353461	86353651	Intergenic	NA	NA
chr10	86557321	86557539	Intergenic	NA	NA
chr10	86953397	86953524	GeneBody	NR_120668.1,NR_120667.1	LINC01519
chr10	87366290	87366383	GeneBody	NR_038986.1,NM_017551.3	GRID1,GRID1-AS1
chr10	87903572	87903865	GeneBody	NM_017551.3	GRID1
chr10	87914940	87915089	GeneBody	NM_017551.3	GRID1
chr10	87955690	87955824	GeneBody	NM_017551.3	GRID1
chr10	88004051	88004428	GeneBody	NM_017551.3	GRID1
chr10	88013136	88013615	GeneBody	NM_017551.3	GRID1
chr10	88153974	88154194	Intergenic	NA	NA
chr10	88391609	88391923	Promoter	RPL7AP8	RPL7AP8
chr10	88391937	88392240	Promoter	RPL7AP8	RPL7AP8
chr10	88778039	88778268	Promoter	NM_001146157.3	FAM25A
chr10	88850180	88850397	GeneBody	NM_001318901.1,NM_001318902.1,NM_001318900.1,NM_001318905.2,NM_001318904.2,NM_001318906.2,NM_005271.5	GLUD1
chr10	88960599	88960956	Intergenic	NA	NA
chr10	88988490	88988817	GeneBody	NM_001099338.2	NUTM2A
chr10	89120772	89121035	GeneBody	NM_001382304.1,NM_001009610.2	NUTM2D
chr10	89125349	89125453	GeneBody	NM_001382304.1,NM_001009610.2	NUTM2D
chr10	89206589	89206703	Intergenic	NA	NA
chr10	89720995	89721123	GeneBody	NM_001304718.2,NM_000314.8,NM_001304717.5	PTEN
chr10	89859728	89859781	Intergenic	NA	NA
chr10	90491146	90491374	GeneBody	NM_001080518.2,NM_001378091.1	LIPK
chr10	90841989	90842114	Intergenic	NA	NA
chr10	91228260	91228389	GeneBody	NM_213606.4	SLC16A12
chr10	91629998	91630097	GeneBody	NR_149080.1	LINC01374
chr10	91852622	91852860	Intergenic	NA	NA
chr10	91917568	91917747	Intergenic	NA	NA
chr10	92025928	92026042	Intergenic	NA	NA
chr10	92061831	92062068	Intergenic	NA	NA
chr10	92108750	92108992	Intergenic	NA	NA
chr10	92303256	92303451	Intergenic	NA	NA
chr10	92411713	92411913	Intergenic	NA	NA
chr10	92431394	92431603	Intergenic	NA	NA
chr10	92677408	92677579	GeneBody	NM_014391.3	ANKRD1
chr10	92680816	92680913	Promoter	NM_014391.3,RNU6-740P	RNU6-740P,ANKRD1
chr10	93817240	93817609	GeneBody	NM_001178137.2,NM_014912.5	CPEB3
chr10	94165143	94165277	Intergenic	NA	NA
chr10	94452082	94452553	GeneBody	NM_002729.5	HHEX
chr10	94455379	94455822	Intergenic	NA	NA
chr10	94820635	94821010	Promoter	NM_183374.3	CYP26C1
chr10	94821060	94821491	Promoter	NM_183374.3	CYP26C1
chr10	94826481	94826612	GeneBody	NM_183374.3	CYP26C1
chr10	96139583	96139806	Intergenic	NA	NA
chr10	96195572	96195689	GeneBody	NM_015188.2	TBC1D12
chr10	96362643	96362890	Intergenic	NA	NA
chr10	97878630	97879099	Intergenic	NA	NA
chr10	98144203	98144478	GeneBody	NM_012465.4	TLL2
chr10	98144490	98144774	GeneBody	NM_012465.4	TLL2
chr10	98207898	98208316	GeneBody	NM_012465.4	TLL2
chr10	98760168	98760421	GeneBody	NM_003061.3	SLIT1
chr10	98760559	98760821	GeneBody	NM_003061.3	SLIT1
chr10	98819218	98819265	GeneBody	NM_003061.3	SLIT1
chr10	98843374	98843437	GeneBody	NM_003061.3	SLIT1
chr10	98869246	98869602	GeneBody	NM_003061.3	SLIT1
chr10	98900086	98900580	GeneBody	NM_003061.3	SLIT1
chr10	98900743	98901005	GeneBody	NM_003061.3	SLIT1
chr10	98930630	98931127	GeneBody	NR_037909.1,NM_003061.3	ARHGAP19-SLIT1,SLIT1
chr10	99766060	99766372	GeneBody	NM_001206528.3,NM_018058.7	CRTAC1
chr10	99867384	99867501	Intergenic	NA	NA
chr10	100086244	100086527	Intergenic	NA	NA
chr10	100086580	100086847	Intergenic	NA	NA
chr10	101104574	101104734	GeneBody	NM_001345888.2,NM_020348.3,NM_001345889.2,NM_001345887.2,NR_144311.2	CNNM1
chr10	101143877	101143981	GeneBody	NM_001345888.2,NM_020348.3,NM_001345889.2,NM_001345887.2,NR_144311.2	CNNM1
chr10	101144273	101144436	GeneBody	NM_001345888.2,NM_020348.3,NM_001345889.2,NM_001345887.2,NR_144311.2	CNNM1
chr10	101686924	101687213	Promoter	NR_024130.3	DNMBP-AS1
chr10	101688591	101688854	Promoter	NR_024130.3,NM_001318326.2	DNMBP,DNMBP-AS1
chr10	101689040	101689147	Promoter	NM_001318326.2	DNMBP
chr10	101689388	101689509	Promoter	NM_001318326.2	DNMBP
chr10	101690120	101690237	Promoter	NM_001318326.2	DNMBP
chr10	101796791	101796847	Intergenic	NA	NA
chr10	101876029	101876091	Promoter	TPM4P1	TPM4P1
chr10	102380083	102380223	Intergenic	NA	NA
chr10	102562559	102562775	GeneBody	NM_003989.5,NM_000278.5,NM_003988.5,NM_003990.5,NM_003987.5,NM_001304569.2	PAX2
chr10	103071008	103071078	Intergenic	NA	NA
chr10	103082358	103082651	Intergenic	NA	NA
chr10	103082676	103082956	Intergenic	NA	NA
chr10	105000078	105000191	Intergenic	NA	NA
chr10	105225246	105225399	Intergenic	NA	NA
chr10	105300450	105300586	GeneBody	NM_004210.5	NEURL1
chr10	106091087	106091248	GeneBody	NM_033397.4,NM_001272013.2	ITPRIP
chr10	106187972	106188023	GeneBody	NM_001008723.2	CFAP58
chr10	106668955	106669136	GeneBody	NM_014978.3	SORCS3
chr10	107025724	107025776	Intergenic	NA	NA
chr10	107158064	107158184	Intergenic	NA	NA
chr10	107345661	107345757	Intergenic	NA	NA
chr10	108337127	108337482	GeneBody	NM_001206569.2,NM_001206572.2,NM_001013031.3,NM_001387556.1,NM_052918.5,NM_001206570.2	SORCS1
chr10	109241080	109241171	Intergenic	NA	NA
chr10	110067844	110067939	Intergenic	NA	NA
chr10	110082847	110083104	Intergenic	NA	NA
chr10	110187607	110187808	Intergenic	NA	NA
chr10	110796318	110796431	Intergenic	NA	NA
chr10	111039455	111039652	Intergenic	NA	NA
chr10	111136137	111136236	Intergenic	NA	NA
chr10	111142903	111143077	Intergenic	NA	NA
chr10	111143677	111143858	Intergenic	NA	NA
chr10	111507228	111507309	Intergenic	NA	NA
chr10	111596768	111596969	Intergenic	NA	NA
chr10	111911033	111911278	Promoter	NR_164121.1	LOC105378479
chr10	112380479	112380627	Intergenic	NA	NA
chr10	112402268	112402359	Promoter	NM_001134363.3	RBM20
chr10	112402497	112402637	Promoter	NM_001134363.3	RBM20
chr10	112407932	112408152	GeneBody	NM_001134363.3	RBM20
chr10	112490581	112490714	GeneBody	NM_001134363.3	RBM20
chr10	112641021	112641253	GeneBody	NM_001199492.2,NM_014456.5,NM_145341.4	PDCD4
chr10	112641529	112641849	GeneBody	NM_001199492.2,NM_014456.5,NM_145341.4	PDCD4
chr10	112888258	112888580	Intergenic	NA	NA
chr10	112888682	112888789	Intergenic	NA	NA
chr10	113027601	113027811	Intergenic	NA	NA
chr10	113633436	113633594	Intergenic	NA	NA
chr10	113702395	113702487	Intergenic	NA	NA
chr10	114323225	114323449	GeneBody	NM_001365710.2,NM_001365714.1,NM_145206.4,NM_001318205.2,NM_001318203.2,NM_001365712.1,NM_001365711.1,NM_001365713.1	VTI1A
chr10	114324003	114324111	GeneBody	NM_001365710.2,NM_001365714.1,NM_145206.4,NM_001318205.2,NM_001318203.2,NM_001365712.1,NM_001365711.1,NM_001365713.1	VTI1A
chr10	114413152	114413195	GeneBody	NM_001365710.2,NM_001365714.1,NM_145206.4,NM_001318205.2,NM_001318203.2,NM_001365712.1,NM_001365711.1,NM_001365713.1	VTI1A
chr10	114675431	114675549	Intergenic	NA	NA
chr10	114721461	114721646	GeneBody	NM_001198530.2,NM_001146284.2,NM_001198527.2,NM_001146286.2,NM_001198526.2,NM_001146285.2,NM_001198529.2,NM_030756.5,NM_001198528.2,NM_001198525.2,NM_001146283.2,NM_001198531.2,NM_001146274.2,NM_001363501.2,NM_001367943.1	TCF7L2
chr10	114743637	114743763	GeneBody	NM_001198530.2,NM_001146284.2,NM_001198527.2,NM_001146286.2,NM_001198526.2,NM_001146285.2,NM_001198529.2,NM_030756.5,NM_001198528.2,NM_001198525.2,NM_001146283.2,NM_001198531.2,NM_001146274.2,NM_001363501.2,NM_001367943.1	TCF7L2
chr10	114788082	114788203	GeneBody	NM_001198530.2,NM_001146284.2,NM_001198527.2,NM_001146286.2,NM_001198526.2,NM_001146285.2,NM_001198529.2,NM_030756.5,NM_001198528.2,NM_001198525.2,NM_001146283.2,NM_001198531.2,NM_001146274.2,NM_001363501.2,NM_001367943.1	TCF7L2
chr10	114820799	114821195	GeneBody	NM_001198530.2,NM_001146284.2,NM_001198527.2,NM_001146286.2,NM_001198526.2,NM_001146285.2,NM_001198529.2,NM_030756.5,NM_001198528.2,NM_001198525.2,NM_001146283.2,NM_001198531.2,NM_001146274.2,NM_001363501.2,NM_001367943.1	TCF7L2
chr10	114822143	114822233	GeneBody	NM_001198530.2,NM_001146284.2,NM_001198527.2,NM_001146286.2,NM_001198526.2,NM_001146285.2,NM_001198529.2,NM_030756.5,NM_001198528.2,NM_001198525.2,NM_001146283.2,NM_001198531.2,NM_001146274.2,NM_001363501.2,NM_001367943.1	TCF7L2
chr10	114910911	114911205	GeneBody	NM_001349870.2,NM_001349871.1,NM_001198530.2,NM_001146284.2,NM_001198527.2,NM_001146286.2,NM_001198526.2,NM_001146285.2,NM_001198529.2,NM_030756.5,NM_001198528.2,NM_001198525.2,NM_001146283.2,NM_001198531.2,NM_001146274.2,NM_001363501.2,NM_001367943.1	TCF7L2
chr10	114911337	114911461	GeneBody	NM_001349870.2,NM_001349871.1,NM_001198530.2,NM_001146284.2,NM_001198527.2,NM_001146286.2,NM_001198526.2,NM_001146285.2,NM_001198529.2,NM_030756.5,NM_001198528.2,NM_001198525.2,NM_001146283.2,NM_001198531.2,NM_001146274.2,NM_001363501.2,NM_001367943.1	TCF7L2
chr10	114940537	114940649	Intergenic	NA	NA
chr10	115071360	115071511	Intergenic	NA	NA
chr10	115080777	115081070	Intergenic	NA	NA
chr10	115143797	115143963	Intergenic	NA	NA
chr10	115166202	115166252	Intergenic	NA	NA
chr10	115310290	115310379	Promoter	NM_001177660.3	HABP2
chr10	115687502	115687612	Intergenic	NA	NA
chr10	115859725	115859888	Intergenic	NA	NA
chr10	117831426	117831542	GeneBody	NM_001348099.3,NM_145793.7,NM_001382559.2,NM_001348098.4,NM_001382558.2,NM_001382560.2,NM_001382561.2,NM_001348096.3,NM_005264.8,NM_001145453.4,NM_001382556.2,NM_001382557.2	GFRA1
chr10	117844661	117844764	GeneBody	NM_001348099.3,NM_145793.7,NM_001382559.2,NM_001348098.4,NM_001382558.2,NM_001382560.2,NM_001382561.2,NM_001348096.3,NM_005264.8,NM_001145453.4,NM_001382556.2,NM_001382557.2	GFRA1
chr10	118233939	118234142	GeneBody	NM_001011709.3	PNLIPRP3
chr10	118268338	118268458	Intergenic	NA	NA
chr10	118368579	118368914	Intergenic	NA	NA
chr10	118650935	118651053	GeneBody	NM_001127211.3,NM_018330.7,NM_001258298.2	SHTN1
chr10	118894273	118894755	GeneBody	NM_001112704.2,NM_199131.3	VAX1
chr10	118919036	118919154	GeneBody	NR_121650.1,NR_121651.1	MIR3663HG
chr10	118928712	118928869	Promoter	NR_037436.1,NR_121650.1,NR_121651.1	MIR3663HG,MIR3663
chr10	118978101	118978436	Intergenic	NA	NA
chr10	119286424	119286629	GeneBody	NR_144378.1,NR_002791.2	EMX2OS
chr10	119378834	119378939	Intergenic	NA	NA
chr10	119410670	119410835	Intergenic	NA	NA
chr10	119972978	119973014	Intergenic	NA	NA
chr10	119998024	119998187	Intergenic	NA	NA
chr10	120017042	120017255	Intergenic	NA	NA
chr10	120181579	120181639	Intergenic	NA	NA
chr10	120181955	120182227	Intergenic	NA	NA
chr10	120203245	120203397	Intergenic	NA	NA
chr10	120385196	120385446	Intergenic	NA	NA
chr10	120704444	120704606	Intergenic	NA	NA
chr10	121014498	121014665	GeneBody	NM_005308.3	GRK5
chr10	121259560	121259749	GeneBody	NM_002925.4,NM_001005339.2	RGS10
chr10	121271564	121271937	GeneBody	NM_002925.4,NM_001005339.2	RGS10
chr10	121275971	121276432	GeneBody	NM_002925.4,NM_001005339.2	RGS10
chr10	121288685	121288792	GeneBody	NM_002925.4,NM_001005339.2	RGS10
chr10	121397922	121398240	Promoter	RPS8P4	RPS8P4
chr10	121461664	121461732	Intergenic	NA	NA
chr10	122191407	122191482	Intergenic	NA	NA
chr10	122548656	122548807	GeneBody	NR_033850.1	WDR11-AS1
chr10	123070326	123070447	Intergenic	NA	NA
chr10	123095701	123095937	Intergenic	NA	NA
chr10	123915390	123915665	GeneBody	NM_001291879.2,NM_206861.3,NM_001291876.2,NM_206862.4,NM_001291877.2	TACC2
chr10	124039393	124039692	GeneBody	NM_144587.5,NM_001318189.3	BTBD16
chr10	124285475	124285606	Intergenic	NA	NA
chr10	124316522	124316711	Intergenic	NA	NA
chr10	124318369	124318531	Promoter	NM_017579.3,NM_004406.3,NM_001320644.2,NM_007329.3,NM_001377530.1	DMBT1
chr10	124432417	124432478	Promoter	NM_001364461.3	LOC112577516
chr10	124482179	124482277	Intergenic	NA	NA
chr10	124491529	124491647	Intergenic	NA	NA
chr10	125143849	125143973	Intergenic	NA	NA
chr10	125190142	125190335	Intergenic	NA	NA
chr10	125275437	125275521	Intergenic	NA	NA
chr10	125431070	125431206	GeneBody	NM_153442.4	GPR26
chr10	125628755	125628845	GeneBody	NM_198148.3	CPXM2
chr10	125650702	125651047	Promoter	NM_198148.3	CPXM2
chr10	125671544	125671823	Intergenic	NA	NA
chr10	125673217	125673348	Intergenic	NA	NA
chr10	125825304	125825539	GeneBody	NM_014863.4,NM_001270765.2,NM_015892.5,NM_001270764.2	CHST15
chr10	125847581	125847835	GeneBody	NM_014863.4,NM_001270765.2,NM_015892.5,NM_001270764.2	CHST15
chr10	125847870	125848136	GeneBody	NM_014863.4,NM_001270765.2,NM_015892.5,NM_001270764.2	CHST15
chr10	126043520	126043839	Intergenic	NA	NA
chr10	126069651	126069969	Intergenic	NA	NA
chr10	126222702	126223004	GeneBody	NM_001318331.2,NM_001167880.2,NM_022126.4	LHPP
chr10	126644455	126644780	GeneBody	NM_017580.3	ZRANB1
chr10	126696710	126697032	GeneBody	NM_022802.3,NM_001321014.2,NM_001290215.3,NM_001321013.2,NM_001321012.2,NM_001290214.3,NM_001329.4,NM_001083914.3	CTBP2
chr10	126717456	126717714	Promoter	NM_022802.3	CTBP2
chr10	126773601	126774021	GeneBody	NM_001321014.2,NM_001290215.3,NM_001321013.2,NM_001321012.2,NM_001290214.3,NM_001329.4,NM_001083914.3	CTBP2
chr10	126836389	126836594	GeneBody	NM_001321014.2,NM_001290215.3,NM_001321013.2,NM_001321012.2,NM_001290214.3,NM_001329.4,NM_001083914.3	CTBP2
chr10	126838354	126838388	GeneBody	NM_001321014.2,NM_001290215.3,NM_001321013.2,NM_001321012.2,NM_001290214.3,NM_001329.4,NM_001083914.3	CTBP2
chr10	126851094	126851478	Promoter	NM_001083914.3	CTBP2
chr10	126862943	126863186	Intergenic	NA	NA
chr10	127280344	127280559	GeneBody	NM_001318133.2	TEX36
chr10	127527583	127527735	GeneBody	NM_078469.3,NM_018180.3,NM_016567.4	BCCIP,DHX32
chr10	127527874	127528060	GeneBody	NM_078469.3,NM_018180.3,NM_016567.4	BCCIP,DHX32
chr10	127770999	127771039	GeneBody	NM_021641.5,NM_001288974.2,NM_001288975.2,NM_003474.6,NM_001288973.2	ADAM12
chr10	127771856	127771940	GeneBody	NM_021641.5,NM_001288974.2,NM_001288975.2,NM_003474.6,NM_001288973.2	ADAM12
chr10	128180058	128180355	GeneBody	NM_001004298.4,NM_001350921.2,NM_001350922.2,NR_146939.2	C10orf90
chr10	128359881	128359961	Promoter	NM_001350923.2,NM_001350921.2,NM_001350922.2,NR_146939.2	C10orf90
chr10	128546795	128546962	Intergenic	NA	NA
chr10	128810252	128810544	GeneBody	NM_001377561.1,NM_001377548.1,NM_001377560.1,NM_001377558.1,NM_001377554.1,NM_001377550.1,NM_001377553.1,NM_001377556.1,NM_001380.5,NM_001377543.1,NM_001377547.1,NM_001377546.1,NM_001290223.2,NM_001377544.1	DOCK1
chr10	128816070	128816112	GeneBody	NM_001377561.1,NM_001377548.1,NM_001377560.1,NM_001377558.1,NM_001377554.1,NM_001377550.1,NM_001377553.1,NM_001377556.1,NM_001380.5,NM_001377543.1,NM_001377547.1,NM_001377546.1,NM_001290223.2,NM_001377544.1	DOCK1
chr10	128847146	128847287	GeneBody	NM_001377561.1,NM_001377548.1,NM_001377560.1,NM_001377558.1,NM_001377554.1,NM_001377550.1,NM_001377553.1,NM_001377556.1,NM_001380.5,NM_001377543.1,NM_001377547.1,NM_001377546.1,NM_001290223.2,NM_001377544.1	DOCK1
chr10	129438080	129438378	Intergenic	NA	NA
chr10	129457061	129457160	Intergenic	NA	NA
chr10	129485871	129485987	Intergenic	NA	NA
chr10	129490261	129490351	Intergenic	NA	NA
chr10	129533136	129533479	Intergenic	NA	NA
chr10	129533592	129533898	Promoter	NM_207426.3	FOXI2
chr10	129533957	129534226	Promoter	NM_207426.3	FOXI2
chr10	129534410	129534878	Promoter	NM_207426.3	FOXI2
chr10	129534890	129535347	Promoter	NM_207426.3	FOXI2
chr10	129632064	129632282	Intergenic	NA	NA
chr10	129635507	129635578	Intergenic	NA	NA
chr10	129637049	129637153	Intergenic	NA	NA
chr10	129638913	129639191	Intergenic	NA	NA
chr10	129797298	129797434	Promoter	NM_001323354.2	PTPRE
chr10	129958647	129958741	Intergenic	NA	NA
chr10	129985463	129985655	Intergenic	NA	NA
chr10	129987540	129987669	Intergenic	NA	NA
chr10	130016408	130016458	Intergenic	NA	NA
chr10	130069736	130069930	Intergenic	NA	NA
chr10	130163755	130163924	Intergenic	NA	NA
chr10	130234586	130234833	Intergenic	NA	NA
chr10	130279807	130280051	Intergenic	NA	NA
chr10	130280158	130280470	Intergenic	NA	NA
chr10	130309671	130310047	Intergenic	NA	NA
chr10	130438297	130438364	Intergenic	NA	NA
chr10	130472031	130472161	Intergenic	NA	NA
chr10	130508118	130508548	Intergenic	NA	NA
chr10	130508568	130509017	Intergenic	NA	NA
chr10	130632168	130632347	Intergenic	NA	NA
chr10	130720999	130721178	Intergenic	NA	NA
chr10	130728866	130729112	Intergenic	NA	NA
chr10	130819868	130820245	Intergenic	NA	NA
chr10	130822134	130822394	Intergenic	NA	NA
chr10	130822512	130822619	Intergenic	NA	NA
chr10	131052211	131052345	Intergenic	NA	NA
chr10	131103424	131103542	Intergenic	NA	NA
chr10	131160114	131160218	Intergenic	NA	NA
chr10	131583363	131583586	Intergenic	NA	NA
chr10	131583703	131583964	Intergenic	NA	NA
chr10	131584048	131584356	Intergenic	NA	NA
chr10	131643675	131643825	GeneBody	NM_001375380.1,NM_001375379.1,NM_001375389.1,NM_001375391.1,NM_001375390.1,NM_001005463.3,NM_001375392.1	EBF3
chr10	131697011	131697359	GeneBody	NM_001375380.1,NM_001375379.1,NM_001375389.1,NM_001375391.1,NM_001375390.1,NM_001005463.3,NM_001375392.1	EBF3
chr10	131697391	131697695	GeneBody	NM_001375380.1,NM_001375379.1,NM_001375389.1,NM_001375391.1,NM_001375390.1,NM_001005463.3,NM_001375392.1	EBF3
chr10	131697710	131698056	GeneBody	NM_001375380.1,NM_001375379.1,NM_001375389.1,NM_001375391.1,NM_001375390.1,NM_001005463.3,NM_001375392.1	EBF3
chr10	131736814	131737058	GeneBody	NM_001375380.1,NM_001375379.1,NM_001375389.1,NM_001375391.1,NM_001375390.1,NM_001005463.3,NM_001375392.1	EBF3
chr10	132015676	132015773	Intergenic	NA	NA
chr10	132058088	132058236	Intergenic	NA	NA
chr10	132152934	132153102	Intergenic	NA	NA
chr10	132176224	132176716	Intergenic	NA	NA
chr10	132222670	132223025	Intergenic	NA	NA
chr10	132240656	132240809	Intergenic	NA	NA
chr10	132278260	132278310	Intergenic	NA	NA
chr10	132883369	132883618	Intergenic	NA	NA
chr10	132883653	132883934	Intergenic	NA	NA
chr10	132912270	132912443	GeneBody	NM_174937.4	TCERG1L
chr10	132981228	132981414	GeneBody	NM_174937.4	TCERG1L
chr10	133024808	133024901	GeneBody	NM_174937.4	TCERG1L
chr10	133113136	133113268	Intergenic	NA	NA
chr10	133338401	133338528	Intergenic	NA	NA
chr10	133481698	133481802	Intergenic	NA	NA
chr10	133482172	133482361	Intergenic	NA	NA
chr10	133774950	133775306	Intergenic	NA	NA
chr10	133775409	133775806	Intergenic	NA	NA
chr10	133775838	133776231	Intergenic	NA	NA
chr10	133810784	133810935	Intergenic	NA	NA
chr10	133811725	133811991	Intergenic	NA	NA
chr10	133824715	133824783	Intergenic	NA	NA
chr10	133975471	133975601	GeneBody	NM_001323089.2,NM_001323088.2,NM_001323090.2,NM_001105521.4,NM_001323086.2,NM_001323087.2	JAKMIP3
chr10	133976504	133976991	GeneBody	NM_001323089.2,NM_001323088.2,NM_001323090.2,NM_001105521.4,NM_001323086.2,NM_001323087.2	JAKMIP3
chr10	133998059	133998149	GeneBody	NM_001323089.2,NM_001323088.2,NM_001323090.2,NM_001105521.4,NM_001323086.2,NM_001323087.2	JAKMIP3
chr10	134079039	134079424	GeneBody	NM_001318879.2,NM_173575.4,NM_001318878.2	STK32C
chr10	134188629	134188998	GeneBody	NM_030626.3,NM_001143757.2	LRRC27
chr10	134226847	134226939	GeneBody	NM_001098637.2,NM_138499.4	PWWP2B
chr10	134227061	134227231	GeneBody	NM_001098637.2,NM_138499.4	PWWP2B
chr10	134234278	134234381	Intergenic	NA	NA
chr10	134401749	134401942	GeneBody	NM_005539.5	INPP5A
chr10	134402045	134402443	GeneBody	NM_005539.5	INPP5A
chr10	134404862	134405125	GeneBody	NM_005539.5	INPP5A
chr10	134498587	134499053	GeneBody	NM_001321042.2,NM_005539.5	INPP5A
chr10	134551744	134552147	GeneBody	NM_001321042.2,NM_005539.5	INPP5A
chr10	134728815	134729104	GeneBody	NM_001200049.3	CFAP46
chr10	135474435	135474571	Promoter	CLUHP5	CLUHP5
chr11	300890	300914	Promoter	NM_001025295.3	IFITM5
chr11	737411	737655	Intergenic	NA	NA
chr11	737743	738053	Intergenic	NA	NA
chr11	936831	936944	GeneBody	NM_012305.4,NM_001242837.2,NR_144509.2,NR_144510.2	AP2A2
chr11	970020	970450	GeneBody	NM_012305.4,NM_001242837.2,NR_144509.2,NR_144510.2	AP2A2
chr11	970489	970939	GeneBody	NM_012305.4,NM_001242837.2,NR_144509.2,NR_144510.2	AP2A2
chr11	1246931	1247200	GeneBody	NM_002458.3	MUC5B
chr11	1247353	1247797	GeneBody	NM_002458.3	MUC5B
chr11	1660118	1660389	Intergenic	NA	NA
chr11	1694231	1694413	Intergenic	NA	NA
chr11	1704056	1704105	Intergenic	NA	NA
chr11	1748782	1748894	Intergenic	NA	NA
chr11	1890742	1890994	Promoter	NM_001013255.1,NM_001013254.1,NM_001289005.2,NM_001013253.2	LSP1
chr11	1891946	1892319	Promoter	NM_001013255.1,NM_001013254.1,NM_001289005.2	LSP1
chr11	1892339	1892718	Promoter	NM_001013255.1,NM_001013254.1,NM_001289005.2	LSP1
chr11	1952612	1952815	GeneBody	NM_001367852.1,NM_001367849.1,NM_001367844.1,NM_001367842.1,NM_001367843.1,NM_001367847.1,NM_001367851.1,NM_001367850.1,NM_001367845.1,NM_001042782.3,NM_001042780.3,NM_006757.4,NM_001367848.1,NM_001042781.3,NM_001363561.2,NM_001367846.1,NM_001297646.2	TNNT3
chr11	2008181	2008400	GeneBody	NR_024471.1	MRPL23-AS1
chr11	2029847	2030153	Intergenic	NA	NA
chr11	2191967	2192071	Promoter	NM_199292.3,NM_199293.3,NM_000360.4	TH
chr11	2208094	2208399	Intergenic	NA	NA
chr11	2227604	2227944	Intergenic	NA	NA
chr11	2453157	2453457	Intergenic	NA	NA
chr11	2548059	2548469	GeneBody	NM_181798.1,NM_000218.3	KCNQ1
chr11	2889303	2889651	Promoter	NR_024627.1	KCNQ1DN
chr11	3117381	3117613	GeneBody	NM_020896.4,NM_001144063.2,NM_145638.3	OSBPL5
chr11	3246984	3247425	GeneBody	NM_001039165.4	MRGPRE
chr11	3302502	3302555	Intergenic	NA	NA
chr11	3450505	3450764	Intergenic	NA	NA
chr11	3467570	3467727	Intergenic	NA	NA
chr11	3499263	3499495	Promoter	NR_169525.1	LOC105376526
chr11	3809152	3809269	GeneBody	NM_005387.7,NM_139131.5,NM_001365126.2,NM_001365125.2,NM_016320.5,NM_139132.4,NM_001365129.2,NM_001365127.2,NM_001365128.2,NR_157589.2,NR_157590.2,NR_157591.1	NUP98
chr11	4517273	4517433	Intergenic	NA	NA
chr11	4817204	4817557	Promoter	OR52Y1P	OR52Y1P
chr11	4826071	4826191	Promoter	NM_001005177.3	OR52R1
chr11	5353737	5353925	Promoter	OR51B8P	OR51B8P
chr11	5621615	5621733	GeneBody	NM_001198645.2,NM_001198644.2,NM_001003818.3,NM_058166.5,NM_001003819.4	TRIM6-TRIM34,TRIM6
chr11	6767623	6767825	Promoter	GVINP2	GVINP2
chr11	6934235	6934306	Intergenic	NA	NA
chr11	7457954	7458098	GeneBody	NM_175733.4	SYT9
chr11	7540709	7541041	GeneBody	NM_001351854.2,NM_003621.5,NM_001351853.2,NM_001351855.2,NM_001351856.2,NM_001351862.2,NR_147792.2	PPFIBP2
chr11	7570281	7570409	GeneBody	NM_001351854.2,NM_003621.5,NM_001351853.2,NM_001351855.2,NM_001351856.2,NM_001351862.2,NR_147792.2	PPFIBP2
chr11	7693597	7693734	Promoter	NM_016229.5,NM_001302826.2,NM_001302827.1,NR_126508.2	CYB5R2
chr11	7693835	7693879	Promoter	NM_016229.5,NM_001302826.2,NM_001302827.1,NR_126508.2	CYB5R2
chr11	7695307	7695683	Promoter	NM_016229.5,NM_001302826.2,NM_001302827.1,NR_126508.2	CYB5R2
chr11	7788932	7789104	Intergenic	NA	NA
chr11	8037994	8038082	Promoter	NR_125366.1	CASC23
chr11	8204882	8205034	Intergenic	NA	NA
chr11	8304688	8304880	Intergenic	NA	NA
chr11	8385075	8385315	Intergenic	NA	NA
chr11	8385598	8385819	Intergenic	NA	NA
chr11	8390462	8390603	Intergenic	NA	NA
chr11	8954205	8954394	Promoter	NM_020643.3	C11orf16
chr11	8954524	8954605	Promoter	NM_020643.3	C11orf16
chr11	8956451	8956937	Intergenic	NA	NA
chr11	9142259	9142413	Intergenic	NA	NA
chr11	9252987	9253217	GeneBody	NM_001348750.2,NM_015213.4,NM_001243254.2,NM_001348749.2,NR_145966.2	DENND5A
chr11	9554980	9555115	Intergenic	NA	NA
chr11	9593575	9593842	Promoter	NM_003390.4	WEE1
chr11	9617334	9617435	Intergenic	NA	NA
chr11	9897439	9897703	GeneBody	NR_120539.1,NM_001386339.1,NM_030962.4,NM_001386342.1	SBF2,LOC101928008
chr11	10316800	10316878	Promoter	NM_001386339.1,NM_030962.4,NM_001386342.1	SBF2
chr11	10328410	10328869	Promoter	NR_103765.1	CAND1.11
chr11	10696304	10696415	GeneBody	NM_001100167.3,NM_001100163.3,NM_130385.4,NM_001206880.2,NM_001206881.2	IRAG1
chr11	10696528	10696590	GeneBody	NM_001100167.3,NM_001100163.3,NM_130385.4,NM_001206880.2,NM_001206881.2	IRAG1
chr11	10924432	10924477	Intergenic	NA	NA
chr11	11199879	11200063	Intergenic	NA	NA
chr11	11424302	11424412	GeneBody	NM_198516.3,NM_001363464.2	GALNT18
chr11	11448964	11449045	GeneBody	NM_198516.3,NM_001363464.2	GALNT18
chr11	11960206	11960311	GeneBody	NM_001372102.1,NM_001372099.1,NM_001372101.1,NM_017944.4,NM_001372098.1,NM_001372092.1,NM_001372097.1,NM_001372091.1,NM_001282659.2,NM_001372096.1,NM_001330208.2,NM_001372103.1,NM_001372100.1,NM_001372094.1,NM_001372093.1,NM_001372095.1	USP47
chr11	12090986	12091086	Intergenic	NA	NA
chr11	12886142	12886298	GeneBody	NM_021961.6	TEAD1
chr11	12886423	12886666	GeneBody	NM_021961.6	TEAD1
chr11	13548511	13548687	Intergenic	NA	NA
chr11	13905795	13905925	Intergenic	NA	NA
chr11	14360433	14360562	GeneBody	NM_012250.6_2,NM_001177314.2_2,NM_001177315.1_2,NM_001102669.2_2	RRAS2
chr11	14880634	14880773	GeneBody	NM_001363569.2_2,NM_000922.4_2,NM_001363570.2_2	PDE3B
chr11	17484496	17484860	GeneBody	NM_000352.6,NM_001351295.2,NM_001287174.2,NM_001351296.2,NM_001351297.2,NR_147094.2	ABCC8
chr11	17497463	17497865	Promoter	NM_000352.6,NM_001351295.2,NM_001287174.2,NM_001351296.2,NM_001351297.2,NR_147094.2	ABCC8
chr11	17735220	17735352	Intergenic	NA	NA
chr11	17772225	17772366	GeneBody	NM_004976.4,NM_001112741.2	KCNC1
chr11	17837147	17837445	GeneBody	NM_012139.4,NR_104040.2,NR_104041.2	SERGEF
chr11	18084639	18084877	Intergenic	NA	NA
chr11	18268746	18268924	Promoter	NM_001385666.1,NM_030754.5,NM_001385670.1,NM_001385669.1,NM_001385668.1,NM_001385671.1,NM_001385673.1,NM_001385667.1,NM_001127380.3,NM_001385672.1,NR_169749.1,NR_169750.1,NM_001199744.2,RNA5SP333	SAA2-SAA4,SAA2,RNA5SP333
chr11	18918160	18918252	Intergenic	NA	NA
chr11	19328228	19328576	Intergenic	NA	NA
chr11	19579752	19579830	GeneBody	NM_001111018.2	NAV2
chr11	20372857	20372998	Intergenic	NA	NA
chr11	20804825	20804979	GeneBody	NM_006157.5,NM_001288714.1,NM_201551.2,NM_001288713.1	NELL1
chr11	20866164	20866195	GeneBody	NM_006157.5,NM_001288714.1,NM_201551.2,NM_001288713.1	NELL1
chr11	22941279	22941533	Intergenic	NA	NA
chr11	24049902	24050064	Intergenic	NA	NA
chr11	24636051	24636233	GeneBody	NM_001252008.2,NM_001252010.2,NM_001009909.4	LUZP2
chr11	24681538	24681770	GeneBody	NM_001252008.2,NM_001252010.2,NM_001009909.4	LUZP2
chr11	24738169	24738239	GeneBody	NM_001252008.2,NM_001252010.2,NM_001009909.4	LUZP2
chr11	24954307	24954423	GeneBody	NM_001252008.2,NM_001252010.2,NM_001009909.4	LUZP2
chr11	26337670	26337804	GeneBody	NM_001313726.2	ANO3
chr11	26590941	26591128	GeneBody	NM_001135091.2,NM_001135092.2,NM_145650.4,NM_001313727.2,NM_031418.4,NM_001313726.2	MUC15,ANO3
chr11	28071008	28071200	GeneBody	NM_031217.4	KIF18A
chr11	28874665	28874748	Intergenic	NA	NA
chr11	29352672	29352897	Intergenic	NA	NA
chr11	30037423	30037491	Promoter	NM_002233.4	KCNA4
chr11	30313266	30313370	Intergenic	NA	NA
chr11	30938460	30938618	GeneBody	NM_001387275.1,NM_020869.4,NM_001387274.1,NM_001367979.1	DCDC1
chr11	31012201	31012382	Promoter	NM_001387275.1,NM_020869.4	DCDC1
chr11	31050468	31050692	GeneBody	NM_001387274.1,NM_001367979.1,NR_170625.1	DCDC1
chr11	31176378	31176450	GeneBody	NM_001387274.1,NM_001367979.1,NR_170625.1	DCDC1
chr11	32373258	32373367	Intergenic	NA	NA
chr11	32440514	32440654	GeneBody	NM_001198552.2,NM_001198551.1,NM_024426.6,NM_024424.5,NM_000378.6,NR_160306.1	WT1
chr11	32451640	32451926	Promoter	NM_001198552.2,NM_001198551.1	WT1
chr11	32500242	32500330	Intergenic	NA	NA
chr11	33752276	33752543	GeneBody	NM_203329.3,NM_203331.3,NM_000611.6,NM_203330.2	CD59
chr11	33903587	33903693	GeneBody	NM_005574.4	LMO2
chr11	33910909	33910967	GeneBody	NM_005574.4	LMO2
chr11	34231571	34231645	GeneBody	NM_145804.3	ABTB2
chr11	34517130	34517467	GeneBody	NM_198381.2,NM_001243081.2,NM_001422.4,NM_001243080.2	ELF5
chr11	34517510	34517845	GeneBody	NM_198381.2,NM_001243081.2,NM_001422.4,NM_001243080.2	ELF5
chr11	34517866	34518233	GeneBody	NM_198381.2,NM_001243081.2,NM_001422.4,NM_001243080.2	ELF5
chr11	34524026	34524454	GeneBody	NM_198381.2,NM_001243081.2,NM_001422.4,NM_001243080.2	ELF5
chr11	34527106	34527450	GeneBody	NM_198381.2,NM_001243081.2,NM_001422.4,NM_001243080.2	ELF5
chr11	34528099	34528359	GeneBody	NM_198381.2,NM_001243081.2,NM_001422.4,NM_001243080.2	ELF5
chr11	34528950	34529324	GeneBody	NM_198381.2,NM_001243081.2,NM_001422.4,NM_001243080.2	ELF5
chr11	34529773	34530027	GeneBody	NM_198381.2,NM_001243081.2,NM_001422.4,NM_001243080.2	ELF5
chr11	34530594	34530938	GeneBody	NM_198381.2,NM_001243081.2,NM_001422.4,NM_001243080.2	ELF5
chr11	34533845	34534172	Promoter	NM_198381.2,NM_001243081.2,NM_001422.4,NM_001243080.2	ELF5
chr11	34534292	34534366	Promoter	NM_198381.2,NM_001243081.2,NM_001422.4,NM_001243080.2	ELF5
chr11	34534479	34534655	Promoter	NM_198381.2,NM_001243081.2,NM_001422.4,NM_001243080.2	ELF5
chr11	34534937	34535295	Promoter	NM_198381.2,NM_001243081.2,NM_001422.4,NM_001243080.2	ELF5
chr11	34535356	34535707	Promoter	NM_001422.4,NM_001243080.2	ELF5
chr11	34536068	34536223	Promoter	NM_001422.4,NM_001243080.2	ELF5
chr11	34576805	34577071	Intergenic	NA	NA
chr11	34592758	34593097	Intergenic	NA	NA
chr11	34658239	34658603	GeneBody	NM_001378052.1,NM_001206616.2,NM_001378048.1,NM_001378047.1,NM_001378051.1,NM_001378045.1,NM_001378044.1,NM_001378056.1,NM_001378055.1,NM_001378053.1,NM_001378042.1,NM_001378054.1,NM_001206615.2,NM_001378049.1,NM_012153.6,NM_001378050.1,NM_001378043.1,NM_001378041.1,NR_165390.1,NR_165391.1	EHF
chr11	34659478	34659743	GeneBody	NM_001378052.1,NM_001206616.2,NM_001378048.1,NM_001378047.1,NM_001378051.1,NM_001378045.1,NM_001378044.1,NM_001378056.1,NM_001378055.1,NM_001378053.1,NM_001378042.1,NM_001378054.1,NM_001206615.2,NM_001378049.1,NM_012153.6,NM_001378050.1,NM_001378043.1,NM_001378041.1,NR_165390.1,NR_165391.1	EHF
chr11	34666031	34666112	GeneBody	NM_001378046.1,NM_001378052.1,NM_001206616.2,NM_001378048.1,NM_001378047.1,NM_001378051.1,NM_001378045.1,NM_001378044.1,NM_001378056.1,NM_001378055.1,NM_001378053.1,NM_001378042.1,NM_001378054.1,NM_001206615.2,NM_001378049.1,NM_012153.6,NM_001378050.1,NM_001378043.1,NM_001378041.1,NR_165390.1,NR_165391.1	EHF
chr11	34687308	34687410	Intergenic	NA	NA
chr11	35294739	35294973	GeneBody	NM_004171.4,NM_001252652.2,NM_001195728.3	SLC1A2
chr11	35498998	35499244	GeneBody	NM_015430.4,NM_001001991.3,NM_001282676.2,NM_001282675.2	PAMR1
chr11	35661554	35661729	Intergenic	NA	NA
chr11	36280396	36280698	Intergenic	NA	NA
chr11	36386343	36386437	GeneBody	NM_001160167.2	PRR5L
chr11	36422556	36422794	Promoter	NM_001160169.1	PRR5L
chr11	36430748	36430892	GeneBody	NM_001160169.1,NM_001160168.2,NM_024841.5,NM_001160167.2	PRR5L
chr11	36447030	36447200	GeneBody	NM_001160169.1,NM_001160168.2,NM_024841.5,NM_001160167.2	PRR5L
chr11	37374333	37374563	Intergenic	NA	NA
chr11	39989526	39989686	Intergenic	NA	NA
chr11	41820254	41820451	GeneBody	NR_120584.1	LINC01499
chr11	44014470	44014687	Intergenic	NA	NA
chr11	44080125	44080282	GeneBody	NM_001031854.2,NM_001363113.1	ACCSL
chr11	44330542	44330923	Promoter	NM_021926.4	ALX4
chr11	44336010	44336076	Intergenic	NA	NA
chr11	44339742	44340019	Intergenic	NA	NA
chr11	44343178	44343432	Intergenic	NA	NA
chr11	44349952	44350200	Intergenic	NA	NA
chr11	44673531	44673776	Intergenic	NA	NA
chr11	44855089	44855278	GeneBody	NM_130783.5	TSPAN18
chr11	45396210	45396364	GeneBody	NR_122071.1	LINC02687
chr11	45494368	45494436	Intergenic	NA	NA
chr11	45504073	45504267	Intergenic	NA	NA
chr11	45506039	45506352	Intergenic	NA	NA
chr11	45682410	45682692	GeneBody	NM_003654.6	CHST1
chr11	45710806	45710891	Intergenic	NA	NA
chr11	45731475	45731632	Intergenic	NA	NA
chr11	45820414	45820552	Intergenic	NA	NA
chr11	45927283	45927398	Promoter	NM_001080446.3	C11orf94
chr11	46197525	46197713	GeneBody	NR_120565.1	LOC101928894
chr11	46295705	46295854	Intergenic	NA	NA
chr11	46409628	46409859	GeneBody	NM_000741.5,NM_001366692.2	CHRM4
chr11	47464778	47465032	GeneBody	NM_005055.5,NM_032645.5	RAPSN
chr11	48040465	48040924	GeneBody	NM_001098503.2,NM_002843.4	PTPRJ
chr11	48050673	48050717	GeneBody	NM_001098503.2,NM_002843.4	PTPRJ
chr11	48088803	48088944	GeneBody	NM_001098503.2,NM_002843.4	PTPRJ
chr11	48115090	48115163	GeneBody	NM_001098503.2,NM_002843.4	PTPRJ
chr11	48199005	48199165	Intergenic	NA	NA
chr11	49212276	49212411	GeneBody	NM_001193471.3,NM_001193472.3,NM_004476.3,NM_001014986.3,NM_001193473.3,NM_001351236.2	FOLH1
chr11	49212585	49212956	GeneBody	NM_001193471.3,NM_001193472.3,NM_004476.3,NM_001014986.3,NM_001193473.3,NM_001351236.2	FOLH1
chr11	57234985	57235239	GeneBody	NM_178570.3	RTN4RL2
chr11	57235266	57235503	GeneBody	NM_178570.3	RTN4RL2
chr11	58962949	58963185	GeneBody	NM_015177.2,NM_001300727.2	DTX4
chr11	60500439	60500696	GeneBody	NM_001354471.2	MS4A18
chr11	60693632	60693818	Promoter	NM_178031.3,NM_017870.4	TMEM132A
chr11	60794029	60794174	Intergenic	NA	NA
chr11	60816487	60816728	Intergenic	NA	NA
chr11	60884484	60884674	GeneBody	NM_014207.4,NM_001346456.2	CD5
chr11	60893466	60893906	GeneBody	NM_014207.4,NM_001346456.2	CD5
chr11	60893945	60894379	GeneBody	NM_014207.4,NM_001346456.2	CD5
chr11	61025711	61025940	GeneBody	NM_152718.2	VWCE
chr11	61049405	61049783	GeneBody	NM_152718.2	VWCE
chr11	61050184	61050368	GeneBody	NM_152718.2	VWCE
chr11	61057710	61057855	GeneBody	NM_152718.2	VWCE
chr11	61394909	61395180	GeneBody	NR_002775.2	RPLP0P2
chr11	61509901	61510106	GeneBody	NM_006133.3	DAGLA
chr11	61637742	61638064	Intergenic	NA	NA
chr11	61736334	61736565	Promoter	NM_002032.3	FTH1
chr11	61801002	61801053	Intergenic	NA	NA
chr11	61925420	61925497	Intergenic	NA	NA
chr11	62184100	62184311	Intergenic	NA	NA
chr11	62624573	62625023	Promoter	NM_001012664.3,NM_001012662.3,NM_002394.6,NR_002565.1,NR_002564.1,NR_152575.1,NR_152584.1,NR_152585.1,NR_152576.1,NR_003098.2,NR_152581.1,NR_152577.1,NR_152583.1,NR_152579.1,NR_152580.1,NR_152582.1,NR_152578.1	SLC3A2,SNHG1,SNORD25,SNORD26
chr11	62625802	62626244	GeneBody	NM_001012664.3,NM_001012662.3,NM_002394.6	SLC3A2
chr11	62626352	62626814	GeneBody	NM_001012664.3,NM_001012662.3,NM_002394.6	SLC3A2
chr11	63267325	63267528	Intergenic	NA	NA
chr11	63567330	63567620	Promoter	RN7SL596P	RN7SL596P
chr11	63708179	63708287	Promoter	NM_001300800.1,NM_024771.4	NAA40
chr11	63862061	63862140	GeneBody	NM_001384466.1,NM_013280.5,NM_014067.4	FLRT1,MACROD1
chr11	64281136	64281284	Intergenic	NA	NA
chr11	64352758	64352938	Intergenic	NA	NA
chr11	64409566	64409701	Promoter	NM_138734.3	NRXN2
chr11	64411951	64412250	Promoter	NM_138734.3	NRXN2
chr11	64412497	64412745	Promoter	NM_138734.3	NRXN2
chr11	64484061	64484444	GeneBody	NM_015080.4,NM_001376262.1,NM_001376263.1,NM_001376267.1,NM_001376265.1,NM_001376266.1,NM_138732.3	NRXN2
chr11	64509203	64509658	GeneBody	NM_001098671.2,NM_001318398.2,NM_001098670.2,NM_153819.1	RASGRP2
chr11	64766250	64766435	Promoter	NM_138456.4	BATF2
chr11	64821670	64821815	GeneBody	NM_005468.3	NAALADL1
chr11	64875944	64876389	GeneBody	NM_013265.4,NR_073519.2	VPS51
chr11	65059437	65059872	GeneBody	NM_002689.4	POLA2
chr11	65359506	65359944	GeneBody	NM_001351087.2,NM_001099409.3	EHBP1L1
chr11	66488794	66489029	GeneBody	NM_006946.4	SPTBN2
chr11	66799350	66799614	GeneBody	NM_001318775.2,NM_177963.4,NM_001177880.2,NM_001318773.2	SYT12
chr11	67419560	67419624	Promoter	NM_080658.2	ACY3
chr11	67616443	67616536	GeneBody	ENPP7P7	ENPP7P7
chr11	67703033	67703170	Intergenic	NA	NA
chr11	67713848	67714002	Intergenic	NA	NA
chr11	67714240	67714677	Intergenic	NA	NA
chr11	67792175	67792354	GeneBody	NM_001030010.3,NM_001290058.2,NM_001290059.2,NM_000694.4,NM_001161473.3	ALDH3B1
chr11	67807213	67807311	Promoter	NM_006019.4,NM_001351059.2	TCIRG1
chr11	67886929	67887298	Promoter	NM_001376219.1,NM_001277.3,NM_001376220.1,NM_212469.2,NM_001376221.1,NM_001376222.1,NR_164782.1	CHKA
chr11	67887351	67887751	Promoter	NM_001376219.1,NM_001277.3,NM_001376220.1,NM_212469.2,NM_001376221.1,NM_001376222.1,NR_164782.1	CHKA
chr11	67916518	67916856	Intergenic	NA	NA
chr11	68146831	68147089	GeneBody	NM_001291902.2,NM_002335.4	LRP5
chr11	68296451	68296481	GeneBody	NM_001352353.2,NM_001352355.2,NM_001352374.2,NM_001352351.2,NM_001352359.2,NM_001352361.2,NM_001352370.2,NM_001352347.2,NM_001352358.2,NM_001352366.2,NM_001164163.2,NM_001352350.2,NM_001352373.2,NM_001352365.2,NM_001352352.2,NM_001164162.2,NM_001352377.2,NM_001164161.2,NM_001164160.2,NM_001352356.2,NM_001352357.2,NM_001352348.2,NM_001164164.2,NM_018312.5,NM_001352380.2,NM_001352368.2,NM_001352378…	PPP6R3
chr11	68577870	68578069	GeneBody	NM_001876.4,NM_001031847.3	CPT1A
chr11	68695321	68695548	GeneBody	NM_002180.3	IGHMBP2
chr11	68760713	68760789	Intergenic	NA	NA
chr11	69145062	69145226	Intergenic	NA	NA
chr11	69265394	69265597	Intergenic	NA	NA
chr11	69438899	69439056	Intergenic	NA	NA
chr11	69439976	69440078	Intergenic	NA	NA
chr11	69536621	69536966	Intergenic	NA	NA
chr11	69623546	69623698	Intergenic	NA	NA
chr11	69706154	69706562	Intergenic	NA	NA
chr11	69706621	69707015	Intergenic	NA	NA
chr11	69803942	69804082	Intergenic	NA	NA
chr11	70372587	70372822	GeneBody	NM_133266.5_2,NM_001379226.1_2,NM_012309.5_2,NR_110766.2_2	SHANK2
chr11	70404669	70405060	GeneBody	NM_133266.5_2,NM_001379226.1_2,NM_012309.5_2,NR_110766.2_2	SHANK2
chr11	70405073	70405419	GeneBody	NM_133266.5_2,NM_001379226.1_2,NM_012309.5_2,NR_110766.2_2	SHANK2
chr11	70442252	70442455	GeneBody	NM_133266.5_2,NM_001379226.1_2,NM_012309.5_2,NR_110766.2_2	SHANK2
chr11	70464392	70464745	GeneBody	NM_133266.5_2,NM_001379226.1_2,NM_012309.5_2,NR_110766.2_2	SHANK2
chr11	70464768	70465102	GeneBody	NM_133266.5_2,NM_001379226.1_2,NM_012309.5_2,NR_110766.2_2	SHANK2
chr11	70484469	70484692	GeneBody	NM_133266.5_2,NM_001379226.1_2,NM_012309.5_2,NR_110766.2_2	SHANK2
chr11	70959383	70959730	GeneBody	NM_012309.5_2	SHANK2
chr11	70961095	70961216	GeneBody	NM_012309.5_2	SHANK2
chr11	70992691	70992878	Intergenic	NA	NA
chr11	71116780	71117139	GeneBody	NR_038862.1	ACTE1P
chr11	71149007	71149408	GeneBody	NM_001360.3,NM_001163817.2	DHCR7
chr11	71238204	71238477	Promoter	NM_001012503.2	KRTAP5-7
chr11	71252788	71253011	Intergenic	NA	NA
chr11	71259145	71259438	Promoter	NM_005553.4	KRTAP5-9
chr11	71263214	71263401	Intergenic	NA	NA
chr11	71298847	71299294	Intergenic	NA	NA
chr11	71598985	71599338	GeneBody	NM_001375847.1,NM_001375848.1	LOC100133315
chr11	71599440	71599670	GeneBody	NM_001375847.1,NM_001375848.1	LOC100133315
chr11	71621917	71622126	GeneBody	NM_001375847.1,NM_001375848.1	LOC100133315
chr11	71951754	71952230	GeneBody	NM_005169.4	PHOX2A
chr11	71956006	71956449	Promoter	NM_005169.4	PHOX2A
chr11	71957133	71957437	Intergenic	NA	NA
chr11	72303203	72303343	GeneBody	NM_001243784.2,NM_001143839.4,NM_001146209.3,NM_002599.5	PDE2A
chr11	72345947	72346098	GeneBody	NM_001243784.2,NM_001143839.4,NM_001146209.3,NM_002599.5	PDE2A
chr11	72429037	72429139	GeneBody	NM_015242.5,NM_001369489.1,NM_001135190.2,NM_001040118.3,NR_161388.1	ARAP1
chr11	74788491	74788635	Intergenic	NA	NA
chr11	74858914	74859065	Intergenic	NA	NA
chr11	74862741	74863000	Promoter	NM_001145212.3,NM_007256.5	SLCO2B1
chr11	74873655	74874029	GeneBody	NM_001145211.3,NM_001145212.3,NM_007256.5	SLCO2B1
chr11	75326994	75327182	GeneBody	NM_207577.1,NM_033063.2	MAP6
chr11	76452079	76452135	Intergenic	NA	NA
chr11	76836424	76836708	GeneBody	NM_004055.5_2	CAPN5
chr11	76858622	76859004	GeneBody	NM_001127180.2_2,NM_000260.4_2,NM_001369365.1_2	MYO7A
chr11	76886924	76887265	GeneBody	NM_001127180.2_2,NM_000260.4_2,NM_001369365.1_2	MYO7A
chr11	77129964	77130174	GeneBody	NM_001376277.1,NM_001376282.1,NM_001376284.1,NM_001376280.1,NM_001376276.1,NM_001376283.1,NM_001376281.1,NM_001128620.2,NM_002576.5,NM_001376290.1,NM_001376301.1,NM_001376268.1,NM_001376273.1,NM_001376304.1	PAK1
chr11	78528802	78528911	GeneBody	NM_001098816.3	TENM4
chr11	78790107	78790267	GeneBody	NM_001098816.3	TENM4
chr11	79064483	79064643	GeneBody	NM_001098816.3	TENM4
chr11	79197043	79197308	Intergenic	NA	NA
chr11	79232862	79233017	Intergenic	NA	NA
chr11	79338483	79338637	Intergenic	NA	NA
chr11	80431573	80431839	Intergenic	NA	NA
chr11	80457697	80457868	Intergenic	NA	NA
chr11	81345686	81345861	Intergenic	NA	NA
chr11	81783886	81784032	GeneBody	NR_120571.1	MIR4300HG
chr11	82425458	82425874	Intergenic	NA	NA
chr11	82440271	82440339	Intergenic	NA	NA
chr11	83221587	83221719	GeneBody	NM_001377976.1,NM_001377978.1,NM_001377979.1,NM_001142702.2,NM_001377980.1,NM_001377981.1,NM_001377982.1,NM_001377977.1,NM_001142699.3,NM_001377972.1,NM_001377974.1,NM_001142700.2,NM_001206769.2,NM_001377966.1,NM_001377967.1,NM_001377970.1,NM_001377971.1,NM_001377973.1,NM_001351276.2,NM_001364.3,NM_001377968.1,NM_001300983.1,NM_001351275.2,NM_001351274.2,NR_165353.1	DLG2
chr11	83235729	83235900	GeneBody	NM_001377976.1,NM_001377978.1,NM_001377979.1,NM_001142702.2,NM_001377980.1,NM_001377981.1,NM_001377982.1,NM_001377977.1,NM_001142699.3,NM_001377972.1,NM_001377974.1,NM_001142700.2,NM_001206769.2,NM_001377966.1,NM_001377967.1,NM_001377970.1,NM_001377971.1,NM_001377973.1,NM_001351276.2,NM_001364.3,NM_001377968.1,NM_001300983.1,NM_001351275.2,NM_001351274.2,NR_165353.1	DLG2
chr11	83666003	83666257	GeneBody	NM_001377975.1,NM_001142699.3,NM_001377972.1,NM_001377974.1,NM_001142700.2,NM_001206769.2,NM_001377966.1,NM_001377967.1,NM_001377970.1,NM_001377971.1,NM_001377973.1,NM_001351276.2,NM_001364.3,NM_001377968.1,NM_001300983.1,NM_001351275.2,NM_001351274.2,NR_165353.1	DLG2
chr11	84834674	84834791	GeneBody	NM_001142699.3,NM_001351275.2,NM_001351274.2	DLG2
chr11	84844333	84844435	GeneBody	NM_001142699.3,NM_001351275.2,NM_001351274.2	DLG2
chr11	85396760	85397215	Promoter	NM_152723.3	CCDC89
chr11	85658215	85658414	Intergenic	NA	NA
chr11	85929431	85929522	Intergenic	NA	NA
chr11	86133281	86133507	GeneBody	NM_021827.5,NM_001156474.2	CCDC81
chr11	86133591	86133831	GeneBody	NM_021827.5,NM_001156474.2	CCDC81
chr11	86636017	86636078	GeneBody	NR_120593.2,NR_120592.2,NR_120591.3	PRSS23
chr11	86695950	86696015	GeneBody	NR_038905.1	FZD4-DT
chr11	88049357	88049612	GeneBody	NM_001814.6	CTSC
chr11	88721677	88721821	GeneBody	NM_000842.5,NM_001143831.3,NM_001384268.1	GRM5
chr11	89340778	89341033	Intergenic	NA	NA
chr11	90491228	90491410	GeneBody	NR_104190.1	DISC1FP1
chr11	91004403	91004543	Intergenic	NA	NA
chr11	91234207	91234230	Intergenic	NA	NA
chr11	91758997	91759112	Intergenic	NA	NA
chr11	92400776	92400927	GeneBody	NM_001008781.3,NM_001367949.2	FAT3
chr11	93378606	93378786	Intergenic	NA	NA
chr11	93472088	93472195	GeneBody	NM_024116.4,NR_146090.2,NR_146091.2	TAF1D
chr11	93577740	93578044	GeneBody	NM_001144871.2	VSTM5
chr11	93669053	93669196	Intergenic	NA	NA
chr11	94278200	94278628	Promoter	NM_002033.3	FUT4
chr11	94278639	94279067	Promoter	NM_002033.3	FUT4
chr11	94840741	94841209	GeneBody	NM_015036.3_2	ENDOD1
chr11	95771452	95771665	GeneBody	NM_032427.4	MAML2
chr11	95932769	95933120	GeneBody	NM_032427.4	MAML2
chr11	95998349	95998413	GeneBody	NM_032427.4	MAML2
chr11	96767875	96767903	Intergenic	NA	NA
chr11	98073383	98073511	Intergenic	NA	NA
chr11	100509879	100510209	Intergenic	NA	NA
chr11	100538326	100538561	Promoter	PPIAP43	PPIAP43
chr11	101314180	101314236	Intergenic	NA	NA
chr11	101513041	101513172	Intergenic	NA	NA
chr11	101620685	101620844	Intergenic	NA	NA
chr11	101713421	101713631	Intergenic	NA	NA
chr11	101897184	101897256	Intergenic	NA	NA
chr11	102180477	102180553	Intergenic	NA	NA
chr11	102663346	102663457	GeneBody	NM_002421.4,NM_001145938.2,NR_038390.1_2	WTAPP1,MMP1
chr11	102745681	102745933	Promoter	NM_002426.6_2	MMP12
chr11	102820654	102820963	GeneBody	NM_002427.4_2	MMP13
chr11	103408035	103408153	Intergenic	NA	NA
chr11	103922636	103922829	GeneBody	NM_025208.5,NM_033135.4	PDGFD
chr11	105239546	105239640	Intergenic	NA	NA
chr11	105741538	105741585	GeneBody	NM_001112812.2,NM_001077244.2,NM_000829.4,NM_001077243.3,NR_046356.2	GRIA4
chr11	106229001	106229230	Intergenic	NA	NA
chr11	106271833	106271990	Intergenic	NA	NA
chr11	106299876	106299960	Intergenic	NA	NA
chr11	106536215	106536445	Intergenic	NA	NA
chr11	107463482	107463668	Promoter	NM_001130037.2,NM_018712.4,NM_001308018.2	ELMOD1
chr11	107464867	107464991	GeneBody	NM_001130037.2,NM_018712.4,NM_001308018.2	ELMOD1
chr11	107520044	107520264	GeneBody	NM_001130037.2,NM_018712.4,NM_001308018.2	ELMOD1
chr11	108408906	108409035	Promoter	NM_001144764.2,NM_001144765.2	EXPH5
chr11	108751367	108751469	GeneBody	NM_004398.4	DDX10
chr11	108983511	108983623	Intergenic	NA	NA
chr11	109004113	109004257	Intergenic	NA	NA
chr11	109451612	109451667	Intergenic	NA	NA
chr11	109656362	109656573	Intergenic	NA	NA
chr11	109855761	109855955	Intergenic	NA	NA
chr11	109915465	109915553	Intergenic	NA	NA
chr11	110326538	110326757	GeneBody	NM_004109.5	FDX1
chr11	110689059	110689168	Intergenic	NA	NA
chr11	110738749	110738831	Intergenic	NA	NA
chr11	110890137	110890392	Intergenic	NA	NA
chr11	111789923	111790271	Promoter	NM_080659.3_2	C11orf52
chr11	112034631	112034996	Promoter	NM_001386420.1,NM_001562.4,NM_001243211.2	IL18
chr11	112141325	112141660	Promoter	NR_126004.1	LINC02762
chr11	112141835	112142015	Promoter	NR_126004.1	LINC02762
chr11	112205274	112205469	GeneBody	NR_126004.1	LINC02762
chr11	112342591	112342672	Intergenic	NA	NA
chr11	112342838	112343039	Intergenic	NA	NA
chr11	113778392	113778647	Promoter	NM_001363563.1	HTR3B
chr11	114104496	114104607	GeneBody	NM_001354752.1,NM_001018011.3,NM_001354751.2,NM_006006.6,NM_001354750.2	ZBTB16
chr11	114394069	114394233	GeneBody	NM_001367953.1,NM_152315.5	NXPE1
chr11	114978182	114978332	Intergenic	NA	NA
chr11	115419753	115419955	Intergenic	NA	NA
chr11	115611988	115612127	Intergenic	NA	NA
chr11	115612405	115612763	Intergenic	NA	NA
chr11	115758033	115758467	Intergenic	NA	NA
chr11	115782401	115782560	Intergenic	NA	NA
chr11	115941486	115941591	Intergenic	NA	NA
chr11	116018203	116018362	Intergenic	NA	NA
chr11	116078455	116078720	Intergenic	NA	NA
chr11	116200783	116200991	Intergenic	NA	NA
chr11	116821419	116821785	GeneBody	NM_001366687.1,NM_001281748.3,NM_025164.6,NM_001281749.3,NM_001366686.3	SIK3
chr11	117308393	117308457	GeneBody	NM_020693.4	DSCAML1
chr11	117313676	117314051	GeneBody	NM_020693.4	DSCAML1
chr11	117314616	117315060	GeneBody	NM_020693.4	DSCAML1
chr11	117315199	117315279	GeneBody	NM_020693.4	DSCAML1
chr11	117315534	117315798	GeneBody	NM_020693.4	DSCAML1
chr11	117316016	117316385	GeneBody	NM_020693.4	DSCAML1
chr11	117325795	117326012	GeneBody	NM_020693.4	DSCAML1
chr11	117363335	117363783	GeneBody	NM_001367904.1,NM_020693.4	DSCAML1
chr11	117366117	117366428	GeneBody	NM_001367904.1,NM_020693.4	DSCAML1
chr11	117372851	117373124	GeneBody	NM_001367904.1,NM_020693.4	DSCAML1
chr11	117373234	117373380	GeneBody	NM_001367904.1,NM_020693.4	DSCAML1
chr11	117376002	117376255	GeneBody	NM_001367904.1,NM_020693.4	DSCAML1
chr11	117383025	117383443	GeneBody	NM_001367904.1,NM_020693.4	DSCAML1
chr11	117510737	117511031	GeneBody	NM_001367905.1,NM_001367904.1,NM_020693.4	DSCAML1
chr11	117520248	117520609	GeneBody	NM_001367905.1,NM_001367904.1,NM_020693.4	DSCAML1
chr11	117857818	117858084	Promoter	NM_001558.4,NR_026691.2	IL10RA
chr11	117876906	117876949	Intergenic	NA	NA
chr11	117999603	117999723	Intergenic	NA	NA
chr11	118057193	118057243	Intergenic	NA	NA
chr11	118763427	118763499	Promoter	NM_032966.2	CXCR5
chr11	119056651	119056714	Promoter	NM_024791.4,NM_001168468.2,NR_033122.2	PDZD3
chr11	119292226	119292536	Promoter	NM_001311160.2,NM_006288.5,NM_001372050.1,NR_164077.1	THY1
chr11	119497744	119497867	Intergenic	NA	NA
chr11	119738540	119738714	Intergenic	NA	NA
chr11	120387503	120387880	GeneBody	NM_014619.5	GRIK4
chr11	120472789	120472876	GeneBody	NM_001282473.3,NM_001282470.3,NM_014619.5	GRIK4
chr11	120508127	120508464	GeneBody	NM_001282473.3,NM_001282470.3,NM_014619.5	GRIK4
chr11	120652638	120652751	GeneBody	NM_001282473.3,NM_001282470.3,NM_014619.5	GRIK4
chr11	120703484	120703942	GeneBody	NM_001282473.3,NM_001282470.3,NM_014619.5	GRIK4
chr11	120738308	120738559	GeneBody	NM_001282473.3,NM_001282470.3,NM_014619.5	GRIK4
chr11	120748723	120749122	GeneBody	NR_132790.1,NM_001282473.3,NM_001282470.3,NM_014619.5	GRIK4,LOC101929227
chr11	120761490	120761730	GeneBody	NR_132790.1,NM_001282473.3,NM_001282470.3,NM_014619.5	GRIK4,LOC101929227
chr11	120870965	120871159	Intergenic	NA	NA
chr11	121108390	121108591	Intergenic	NA	NA
chr11	121349527	121349784	Promoter	NR_169501.1	LOC105369535
chr11	121367620	121367725	GeneBody	NM_003105.6	SORL1
chr11	121481562	121481748	GeneBody	NM_003105.6	SORL1
chr11	121810020	121810229	Intergenic	NA	NA
chr11	122100336	122100686	GeneBody	NR_137180.1,NR_137193.1,NR_137192.1,NR_137179.1	MIR100HG
chr11	122162965	122163100	GeneBody	NR_137180.1,NR_137193.1,NR_137192.1,NR_137179.1	MIR100HG
chr11	122177826	122178061	GeneBody	NR_137180.1,NR_137193.1,NR_137192.1,NR_137179.1	MIR100HG
chr11	122513918	122513977	Intergenic	NA	NA
chr11	122906549	122906707	Promoter	RPL34P23	RPL34P23
chr11	122906813	122907099	Promoter	RPL34P23	RPL34P23
chr11	123039200	123039372	GeneBody	NM_024769.5	CLMP
chr11	123138758	123139059	Intergenic	NA	NA
chr11	123420621	123420984	GeneBody	NM_001387029.1,NM_020716.4,NM_001387028.1,NM_001286563.3,NM_001387033.1,NM_001330396.3,NM_001387032.1,NM_001387030.1,NM_001387034.1,NM_001387026.1,NM_001387025.1,NM_001387024.1,NM_001367418.2,NM_001367419.2,NM_001367420.2,NM_001367421.2	GRAMD1B
chr11	123421210	123421243	GeneBody	NM_001387029.1,NM_020716.4,NM_001387028.1,NM_001286563.3,NM_001387033.1,NM_001330396.3,NM_001387032.1,NM_001387030.1,NM_001387034.1,NM_001387026.1,NM_001387025.1,NM_001387024.1,NM_001367418.2,NM_001367419.2,NM_001367420.2,NM_001367421.2	GRAMD1B
chr11	123430241	123430705	Promoter	NM_001387031.1,NM_001387035.1,NM_001286564.3	GRAMD1B
chr11	123430723	123431161	Promoter	NM_001387031.1,NM_001387035.1,NM_001286564.3	GRAMD1B
chr11	123553825	123554058	Intergenic	NA	NA
chr11	123554350	123554603	Intergenic	NA	NA
chr11	123559391	123559654	Intergenic	NA	NA
chr11	123677501	123677921	Promoter	NM_001005325.1	OR6M1
chr11	123814153	123814384	Promoter	NM_001005187.1	OR6T1
chr11	124065499	124065688	Intergenic	NA	NA
chr11	124588928	124589159	Intergenic	NA	NA
chr11	124710146	124710339	Intergenic	NA	NA
chr11	125071928	125071978	GeneBody	NM_001382333.1	PKNOX2
chr11	125109946	125110247	GeneBody	NM_001382338.1,NM_001382329.1,NM_001382325.1,NM_001382336.1,NM_001382332.1,NM_001382334.1,NM_001382341.1,NM_001382339.1,NM_001382323.2,NM_001382324.1,NM_001382331.1,NM_001382328.1,NM_001382333.1,NR_168076.1,NR_168079.1,NR_168083.1,NR_168078.1,NR_168082.1	PKNOX2
chr11	125132598	125132990	GeneBody	NM_001382338.1,NM_001382329.1,NM_001382325.1,NM_001382336.1,NM_001382332.1,NM_001382334.1,NM_001382341.1,NM_001382339.1,NM_001382323.2,NM_001382324.1,NM_001382331.1,NM_001382328.1,NM_001382333.1,NR_168076.1,NR_168079.1,NR_168083.1,NR_168078.1,NR_168082.1	PKNOX2
chr11	125221054	125221475	Promoter	NR_168077.1	PKNOX2
chr11	125364400	125364779	Promoter	NR_164147.1,NR_164146.1,NM_022549.4,NM_005103.5	LOC403312,FEZ1
chr11	125564047	125564132	Intergenic	NA	NA
chr11	125942651	125942943	Intergenic	NA	NA
chr11	125985775	125986117	Intergenic	NA	NA
chr11	126084744	126084873	Promoter	RNU4-86P	RNU4-86P
chr11	126211098	126211283	GeneBody	NM_014026.6,NM_001350236.2	DCPS
chr11	126245815	126245881	GeneBody	NM_006278.3,NM_001348399.2,NM_001348397.2,NM_001348398.2,NM_001348400.2,NM_001254757.2,NM_001348396.2,NR_145671.2	ST3GAL4
chr11	126257711	126257846	GeneBody	NM_006278.3,NM_001348399.2,NM_001348397.2,NM_001348398.2,NM_001348400.2,NM_001254757.2,NM_001348396.2,NR_145671.2	ST3GAL4
chr11	126275739	126275809	Promoter	NM_001254759.2	ST3GAL4
chr11	126456273	126456650	GeneBody	NM_001161707.1,NM_001301097.1,NM_032531.4	KIRREL3
chr11	126462778	126463241	GeneBody	NM_001161707.1,NM_001301097.1,NM_032531.4	KIRREL3
chr11	126660518	126660796	GeneBody	NM_001161707.1,NM_001301097.1,NM_032531.4	KIRREL3
chr11	126694310	126694482	GeneBody	NM_001161707.1,NM_001301097.1,NM_032531.4	KIRREL3
chr11	126709833	126709947	GeneBody	NM_001161707.1,NM_001301097.1,NM_032531.4	KIRREL3
chr11	126848946	126849010	GeneBody	NM_001161707.1,NM_001301097.1,NM_032531.4	KIRREL3
chr11	126869777	126870020	Promoter	NM_001161707.1,NM_001301097.1,NM_032531.4	KIRREL3
chr11	127393176	127393366	Intergenic	NA	NA
[truncated: 9,655 more rows]
