# Supplementary material for: Loss of epigenetic suppression of retrotransposons with oncogenic potential in aging mammary luminal epithelial cells
Source: HighWire-hosted journal article supplement (doi:10.1101/gr.277511.122), 2023-07-18
Supplement: Supplemental_Table_S6.xlsx [file Supplemental_Table_S6.xlsx]

## Sheet: Table S6A
Table S6A: TE subfamilies significantly enriched in DMRs with methylation loss in old LEps
TE subfamily	log(enrichment)	pval	total number of elements	No. of overlaps	Mean of overlaps for random regions	Percentage overlaps
MIRb	-0.233486	0.022	223887	174	204.567	0.0777178
MIR	-0.426063	0.002	174396	121	162.571	0.0693823
L2a	-1.06154	0	166340	92	192.018	0.0553084
HERVH-int	2.38446	0	5787	89	17.045	1.53793
AluJb	-0.716864	0	117273	81	133.132	0.0690696
AluSz	-0.861926	0	118033	80	145.397	0.0677777
L2c	-0.864156	0	126360	73	132.88	0.0577714
AluSx	-1.03816	0	124945	73	149.913	0.0584257
L2b	-0.545243	0.002	91943	64	93.393	0.0696083
MIRc	-0.460963	0.008	100994	63	86.717	0.0623799
AluSx1	-1.29262	0	106483	54	132.285	0.0507123
AluSp	-0.698427	0	64572	49	79.514	0.0758843
MER52A	3.21119	0	1420	45	4.859	3.16901
L2	-0.785562	0	54017	38	65.503	0.0703482
AluSz6	-0.529571	0.018	40962	34	49.079	0.0830038
L2d2	-0.533548	0.02	52674	33	47.767	0.0626495
L3	-0.534684	0.048	45293	32	46.356	0.0706511
AluJr	-2.02761	0	114124	32	130.473	0.0280397
AluSq2	-1.03374	0	51711	31	63.467	0.0599486
AluSx3	-0.703888	0.012	38631	27	43.98	0.0698921
AluY	-2.35172	0	98084	24	122.504	0.0244688
AluSg	-1.34326	0	42580	21	53.282	0.0493189
AluSc	-1.13178	0	37679	21	46.017	0.055734
AluJo	-1.61383	0	45868	16	48.97	0.0348827
MER52D	2.99291	0	657	13	1.633	1.97869
LTR2752	4.36473	0	230	13	0.631	5.65217
L1M5	-2.07263	0	44640	13	54.685	0.0291219
MLT1D	-1.05427	0.006	18645	12	24.92	0.0643604
L1MB7	-1.67144	0	23185	12	38.224	0.0517576
L2d	-1.25893	0	27881	11	26.325	0.0394534
L1PA4	-2.25942	0	11926	11	52.668	0.0922355

## Sheet: Table S6B
Table S6B: TE subfamilies significantly enriched in DMRs with methylation gain in old LEps.
TE subfamily	log(enrichment)	pval	total number of elements	No. of overlaps	Mean of overlaps for random regions	Percentage overlaps
L2a	-0.444706	0	166340	219	298.067	0.131658
MIR	-0.324466	0	174396	199	249.188	0.114108
L2c	-0.344123	0.002	126360	161	204.37	0.127414
AluSx	-0.930405	0	124945	122	232.509	0.097643
AluSx1	-0.979214	0	106483	105	206.996	0.0986073
AluSz	-1.13909	0	118033	103	226.85	0.0872637
AluJb	-1.51109	0	117273	73	208.068	0.0622479
AluY	-1.45152	0	98084	70	191.447	0.0713674
AluSp	-0.843518	0	64572	69	123.815	0.106857
AluSq2	-0.676748	0	51711	62	99.109	0.119897
L2	-0.806587	0	54017	58	101.446	0.107374
AluJr	-1.96025	0	114124	52	202.347	0.0455645
AluSc	-0.677791	0	37679	45	71.986	0.11943
LTR10C	4.93364	0	519	43	1.407	8.28516
AluSx3	-0.781444	0.002	38631	40	68.754	0.103544
AluSg	-1.05222	0	42580	40	82.949	0.0939408
AluJo	-0.919969	0	45868	40	75.683	0.0872068
AluSz6	-1.16445	0	40962	34	76.21	0.0830038
L1PA7	-1.43524	0	13116	33	89.241	0.251601
L1ME4a	-0.600356	0.01	29291	33	50.031	0.112663
L1ME1	-1.37011	0	31305	33	85.302	0.105414
HAL1	-0.550244	0.034	21238	33	48.323	0.155382
HERVE-int	3.67915	0	268	30	2.342	11.194
MER5A	-0.702278	0.012	34906	28	45.558	0.0802154
LTR16C	1.14287	0.004	6620	28	12.68	0.422961
L1ME4b	-0.681995	0.01	24590	28	44.922	0.113867
MER11D	4.8183	0	260	27	0.957	10.3846
L2d	-0.60667	0.018	27881	27	41.114	0.0968401
L1PA5	-1.43161	0	11398	27	72.832	0.236884
L1M5	-1.71078	0	44640	26	85.108	0.0582437
L1MB3	-0.783492	0.004	17260	24	41.311	0.13905
L1PB1	-1.43359	0	13093	23	62.127	0.175666
LTR5_Hs	2.98415	0	653	21	2.654	3.21593
L1MC5a	-0.741657	0.008	17929	21	35.114	0.117129
