# Supplementary material for: Loss of epigenetic suppression of retrotransposons with oncogenic potential in aging mammary luminal epithelial cells
Source: HighWire-hosted journal article supplement (doi:10.1101/gr.277511.122), 2023-07-18
Supplement: Supplemental_Table_S7.xlsx [file Supplemental_Table_S7.xlsx]

## Sheet: Table S7A
Table S7A: Transcription factor binding sites enriched at DMRs with methylation loss.
Motif Name	Consensus	P-value	Log P-value	q-value (Benjamini)	# of Target Sequences with Motif(of 7225)	% of Target Sequences with Motif	# of Background Sequences with Motif(of 40123)	% of Background Sequences with Motif
Egr1(Zf)/K562-Egr1-ChIP-Seq(GSE32465)/Homer	TGCGTGGGYG	1e-91	-210.5	0	1130	0.1564	3334.2	0.0831
Egr2(Zf)/Thymocytes-Egr2-ChIP-Seq(GSE34254)/Homer	NGCGTGGGCGGR	1e-75	-173.7	0	418	0.0579	819.4	0.0204
p63(p53)/Keratinocyte-p63-ChIP-Seq(GSE17611)/Homer	NNDRCATGYCYNRRCATGYH	1e-72	-167.3	0	602	0.0833	1479	0.0369
NF1-halfsite(CTF)/LNCaP-NF1-ChIP-Seq(Unpublished)/Homer	YTGCCAAG	1e-72	-167	0	2035	0.2817	7762.3	0.1935
p73(p53)/Trachea-p73-ChIP-Seq(PRJNA310161)/Homer	NRRRCAWGTCCDGRCATGYY	1e-55	-128.9	0	144	0.0199	149.6	0.0037
p53(p53)/Saos-p53-ChIP-Seq(GSE15780)/Homer	RRCATGYCYRGRCATGYYYN	1e-53	-122.5	0	200	0.0277	296.2	0.0074
p53(p53)/Saos-p53-ChIP-Seq/Homer	RRCATGYCYRGRCATGYYYN	1e-53	-122.5	0	200	0.0277	296.2	0.0074
WT1(Zf)/Kidney-WT1-ChIP-Seq(GSE90016)/Homer	MCTCCCMCRCAB	1e-52	-120.4	0	855	0.1184	2750.9	0.0686
TEAD4(TEA)/Tropoblast-Tead4-ChIP-Seq(GSE37350)/Homer	CCWGGAATGY	1e-28	-66.61	0	874	0.121	3300.3	0.0823
RUNX1(Runt)/Jurkat-RUNX1-ChIP-Seq(GSE29180)/Homer	AAACCACARM	1e-28	-65.87	0	928	0.1285	3560	0.0887
TEAD3(TEA)/HepG2-TEAD3-ChIP-Seq(Encode)/Homer	TRCATTCCAG	1e-27	-63.78	0	1059	0.1466	4205.6	0.1048
TEAD1(TEAD)/HepG2-TEAD1-ChIP-Seq(Encode)/Homer	CYRCATTCCA	1e-24	-56.44	0	929	0.1286	3676.5	0.0916
RUNX(Runt)/HPC7-Runx1-ChIP-Seq(GSE22178)/Homer	SAAACCACAG	1e-22	-51.33	0	657	0.0909	2461.8	0.0614
Lhx2(Homeobox)/HFSC-Lhx2-ChIP-Seq(GSE48068)/Homer	TAATTAGN	1e-20	-46.38	0	746	0.1033	2933.9	0.0731
TEAD(TEA)/Fibroblast-PU.1-ChIP-Seq(Unpublished)/Homer	YCWGGAATGY	1e-19	-45.11	0	638	0.0883	2442.2	0.0609
Tlx?(NR)/NPC-H3K4me1-ChIP-Seq(GSE16256)/Homer	CTGGCAGSCTGCCA	1e-18	-43.64	0	501	0.0694	1829.7	0.0456
Dlx3(Homeobox)/Kerainocytes-Dlx3-ChIP-Seq(GSE89884)/Homer	NDGTAATTAC	1e-17	-40.42	0	475	0.0658	1744	0.0435
Lhx3(Homeobox)/Neuron-Lhx3-ChIP-Seq(GSE31456)/Homer	ADBTAATTAR	1e-17	-39.9	0	1109	0.1535	4793.3	0.1195
Fra1(bZIP)/BT549-Fra1-ChIP-Seq(GSE46166)/Homer	NNATGASTCATH	1e-16	-38	0	422	0.0584	1529.1	0.0381
Lhx1(Homeobox)/EmbryoCarcinoma-Lhx1-ChIP-Seq(GSE70957)/Homer	NNYTAATTAR	1e-15	-36.18	0	759	0.1051	3132.5	0.0781
Fra2(bZIP)/Striatum-Fra2-ChIP-Seq(GSE43429)/Homer	GGATGACTCATC	1e-15	-35.42	0	378	0.0523	1357.1	0.0338
NF1(CTF)/LNCAP-NF1-ChIP-Seq(Unpublished)/Homer	CYTGGCABNSTGCCAR	1e-14	-32.84	0	467	0.0646	1790.7	0.0446
RUNX-AML(Runt)/CD4+-PolII-ChIP-Seq(Barski_et_al.)/Homer	GCTGTGGTTW	1e-14	-32.83	0	635	0.0879	2583.8	0.0644
Nkx6.1(Homeobox)/Islet-Nkx6.1-ChIP-Seq(GSE40975)/Homer	GKTAATGR	1e-13	-30.49	0	1661	0.2299	7805.9	0.1946
TEAD2(TEA)/Py2T-Tead2-ChIP-Seq(GSE55709)/Homer	CCWGGAATGY	1e-13	-30.32	0	518	0.0717	2060.6	0.0514
Atf3(bZIP)/GBM-ATF3-ChIP-Seq(GSE33912)/Homer	DATGASTCATHN	1e-12	-29.16	0	479	0.0663	1891.4	0.0471
HIC1(Zf)/Treg-ZBTB29-ChIP-Seq(GSE99889)/Homer	TGCCAGCB	1e-12	-28.07	0	2319	0.321	11348.7	0.2829
Rbpj1(?)/Panc1-Rbpj1-ChIP-Seq(GSE47459)/Homer	HTTTCCCASG	1e-12	-28.04	0	1296	0.1794	5972.5	0.1489
BATF(bZIP)/Th17-BATF-ChIP-Seq(GSE39756)/Homer	DATGASTCAT	1e-11	-27.49	0	464	0.0642	1842.2	0.0459
Ap4(bHLH)/AML-Tfap4-ChIP-Seq(GSE45738)/Homer	NAHCAGCTGD	1e-11	-26.6	0	1195	0.1654	5486.2	0.1368
JunB(bZIP)/DendriticCells-Junb-ChIP-Seq(GSE36099)/Homer	RATGASTCAT	1e-11	-25.69	0	404	0.0559	1583.8	0.0395
RUNX2(Runt)/PCa-RUNX2-ChIP-Seq(GSE33889)/Homer	NWAACCACADNN	1e-10	-25.31	0	682	0.0944	2928.1	0.073
Atoh1(bHLH)/Cerebellum-Atoh1-ChIP-Seq(GSE22111)/Homer	VNRVCAGCTGGY	1e-10	-24.91	0	1056	0.1462	4813.9	0.12
AP-1(bZIP)/ThioMac-PU.1-ChIP-Seq(GSE21512)/Homer	VTGACTCATC	1e-10	-24.84	0	543	0.0752	2257.9	0.0563
Fosl2(bZIP)/3T3L1-Fosl2-ChIP-Seq(GSE56872)/Homer	NATGASTCABNN	1e-10	-24.67	0	261	0.0361	939.4	0.0234
MyoG(bHLH)/C2C12-MyoG-ChIP-Seq(GSE36024)/Homer	AACAGCTG	1e-10	-24.14	0	1055	0.146	4825.6	0.1203
Unknown(Homeobox)/Limb-p300-ChIP-Seq/Homer	SSCMATWAAA	1e-09	-22.85	0	465	0.0644	1912	0.0477
Jun-AP1(bZIP)/K562-cJun-ChIP-Seq(GSE31477)/Homer	GATGASTCATCN	1e-09	-22.48	0	200	0.0277	690.9	0.0172
Smad4(MAD)/ESC-SMAD4-ChIP-Seq(GSE29422)/Homer	VBSYGTCTGG	1e-09	-22.45	0	1471	0.2036	7019.7	0.175
p53(p53)/mES-cMyc-ChIP-Seq(GSE11431)/Homer	ACATGCCCGGGCAT	1e-09	-22.19	0	49	0.0068	95.3	0.0024
TCF4(bHLH)/SHSY5Y-TCF4-ChIP-Seq(GSE96915)/Homer	SMCATCTGKH	1e-09	-22.02	0	1365	0.189	6477.2	0.1615
Tcfcp2l1(CP2)/mES-Tcfcp2l1-ChIP-Seq(GSE11431)/Homer	NRAACCRGTTYRAACCRGYT	1e-09	-20.86	0	143	0.0198	459.4	0.0115
Tcf12(bHLH)/GM12878-Tcf12-ChIP-Seq(GSE32465)/Homer	VCAGCTGYTG	1e-08	-19.11	0	1021	0.1413	4770.4	0.1189
Tcf21(bHLH)/ArterySmoothMuscle-Tcf21-ChIP-Seq(GSE61369)/Homer	NAACAGCTGG	1e-08	-18.8	0	938	0.1298	4351	0.1085
Olig2(bHLH)/Neuron-Olig2-ChIP-Seq(GSE30882)/Homer	RCCATMTGTT	1e-07	-18.36	0	1549	0.2144	7549.1	0.1882
Smad2(MAD)/ES-SMAD2-ChIP-Seq(GSE29422)/Homer	CTGTCTGG	1e-07	-18.29	0	1396	0.1932	6745.1	0.1681
LEF1(HMG)/H1-LEF1-ChIP-Seq(GSE64758)/Homer	CCTTTGATST	1e-07	-17.37	0	428	0.0592	1818.7	0.0453
AP-2alpha(AP2)/Hela-AP2alpha-ChIP-Seq(GSE31477)/Homer	ATGCCCTGAGGC	1e-07	-17.25	0	932	0.129	4359.7	0.1087
Bach2(bZIP)/OCILy7-Bach2-ChIP-Seq(GSE44420)/Homer	TGCTGAGTCA	1e-07	-16.64	0	159	0.022	563.5	0.014
MYB(HTH)/ERMYB-Myb-ChIPSeq(GSE22095)/Homer	GGCVGTTR	1e-07	-16.37	0	1311	0.1815	6357.1	0.1585

## Sheet: Table S7B
Table S7B: Transcription factor binding sites enriched at DMRs with methylation gain.
Motif Name	Consensus	P-value	Log P-value	q-value (Benjamini)	# of Target Sequences with Motif(of 11685)	% of Target Sequences with Motif	# of Background Sequences with Motif(of 34264)	% of Background Sequences with Motif
EHF(ETS)/LoVo-EHF-ChIP-Seq(GSE49402)/Homer	AVCAGGAAGT	1e-256	-589.8	0	2815	0.2409	4286.4	0.1251
ELF3(ETS)/PDAC-ELF3-ChIP-Seq(GSE64557)/Homer	ANCAGGAAGT	1e-214	-494.4	0	1739	0.1488	2262.4	0.066
ELF5(ETS)/T47D-ELF5-ChIP-Seq(GSE30407)/Homer	ACVAGGAAGT	1e-185	-426.8	0	1711	0.1464	2361.2	0.0689
Elf4(ETS)/BMDM-Elf4-ChIP-Seq(GSE88699)/Homer	ACTTCCKGKT	1e-173	-399.6	0	2086	0.1785	3228.1	0.0942
ERG(ETS)/VCaP-ERG-ChIP-Seq(GSE14097)/Homer	ACAGGAAGTG	1e-134	-309	0	2785	0.2383	5174.4	0.151
ETV1(ETS)/GIST48-ETV1-ChIP-Seq(GSE22441)/Homer	AACCGGAAGT	1e-101	-232.6	0	2363	0.2022	4489.8	0.131
NF1-halfsite(CTF)/LNCaP-NF1-ChIP-Seq(Unpublished)/Homer	YTGCCAAG	1e-94	-218.6	0	2626	0.2247	5207.6	0.1519
Etv2(ETS)/ES-ER71-ChIP-Seq(GSE59402)/Homer(0.967)	NNAYTTCCTGHN	1e-85	-196.4	0	1618	0.1384	2874.2	0.0839
ETS1(ETS)/Jurkat-ETS1-ChIP-Seq(GSE17954)/Homer	ACAGGAAGTG	1e-72	-166.1	0	1751	0.1498	3324.9	0.097
ETV4(ETS)/HepG2-ETV4-ChIP-Seq(ENCODE)/Homer	ACCGGAAGTG	1e-68	-158.5	0	1899	0.1625	3722	0.1086
GABPA(ETS)/Jurkat-GABPa-ChIP-Seq(GSE17954)/Homer	RACCGGAAGT	1e-67	-155.7	0	1546	0.1323	2883.7	0.0841
EWS:ERG-fusion(ETS)/CADO_ES1-EWS:ERG-ChIP-Seq(SRA014231)/Homer	ATTTCCTGTN	1e-62	-145.1	0	1260	0.1078	2259	0.0659
NF1(CTF)/LNCAP-NF1-ChIP-Seq(Unpublished)/Homer	CYTGGCABNSTGCCAR	1e-60	-139.3	0	659	0.0564	956.8	0.0279
Fli1(ETS)/CD8-FLI-ChIP-Seq(GSE20898)/Homer	NRYTTCCGGH	1e-57	-133.5	0	1886	0.1614	3828.8	0.1117
SPDEF(ETS)/VCaP-SPDEF-ChIP-Seq(SRA014231)/Homer	ASWTCCTGBT	1e-55	-126.8	0	1590	0.136	3135.2	0.0915
ELF1(ETS)/Jurkat-ELF1-ChIP-Seq(SRA014231)/Homer	AVCCGGAAGT	1e-46	-107.6	0	952	0.0815	1710	0.0499
Stat3+il21(Stat)/CD4-Stat3-ChIP-Seq(GSE19198)/Homer	SVYTTCCNGGAARB	1e-45	-103.6	0	1042	0.0892	1937.1	0.0565
Foxo1(Forkhead)/RAW-Foxo1-ChIP-Seq(Fan_et_al.)/Homer	CTGTTTAC	1e-43	-101.1	0	2649	0.2267	6024.5	0.1758
AP-2alpha(AP2)/Hela-AP2alpha-ChIP-Seq(GSE31477)/Homer	ATGCCCTGAGGC	1e-43	-100.7	0	1266	0.1083	2488.5	0.0726
Tlx?(NR)/NPC-H3K4me1-ChIP-Seq(GSE16256)/Homer	CTGGCAGSCTGCCA	1e-43	-99.67	0	644	0.0551	1048.5	0.0306
STAT4(Stat)/CD4-Stat4-ChIP-Seq(GSE22104)/Homer	NYTTCCWGGAAR	1e-42	-96.95	0	1370	0.1172	2764.1	0.0806
Bcl6(Zf)/Liver-Bcl6-ChIP-Seq(GSE31578)/Homer	NNNCTTTCCAGGAAA	1e-38	-89.51	0	1807	0.1546	3914.2	0.1142
Stat3(Stat)/mES-Stat3-ChIP-Seq(GSE11431)/Homer	CTTCCGGGAA	1e-37	-86.92	0	822	0.0703	1501.8	0.0438
AP-2gamma(AP2)/MCF7-TFAP2C-ChIP-Seq(GSE21234)/Homer	SCCTSAGGSCAW	1e-37	-85.29	0	1532	0.1311	3243.4	0.0946
FOXP1(Forkhead)/H9-FOXP1-ChIP-Seq(GSE31006)/Homer	NYYTGTTTACHN	1e-36	-84.44	0	668	0.0572	1159.9	0.0338
PU.1(ETS)/ThioMac-PU.1-ChIP-Seq(GSE21512)/Homer	AGAGGAAGTG	1e-36	-82.97	0	781	0.0668	1424.2	0.0416
EWS:FLI1-fusion(ETS)/SK_N_MC-EWS:FLI1-ChIP-Seq(SRA014231)/Homer	VACAGGAAAT	1e-35	-82.83	0	922	0.0789	1756.4	0.0512
Foxo3(Forkhead)/U2OS-Foxo3-ChIP-Seq(E-MTAB-2701)/Homer	DGTAAACA	1e-34	-78.77	0	1086	0.0929	2174.4	0.0634
STAT5(Stat)/mCD4+-Stat5-ChIP-Seq(GSE12346)/Homer	RTTTCTNAGAAA	1e-29	-68.73	0	552	0.0472	962.4	0.0281
STAT1(Stat)/HelaS3-STAT1-ChIP-Seq(GSE12782)/Homer	NATTTCCNGGAAAT	1e-29	-67.66	0	501	0.0429	853	0.0249
FOXK2(Forkhead)/U2OS-FOXK2-ChIP-Seq(E-MTAB-2204)/Homer	SCHTGTTTACAT	1e-27	-62.45	0	910	0.0779	1841.4	0.0537
FOXK1(Forkhead)/HEK293-FOXK1-ChIP-Seq(GSE51673)/Homer	NVWTGTTTAC	1e-26	-61.88	0	1420	0.1215	3131	0.0913
GRHL2(CP2)/HBE-GRHL2-ChIP-Seq(GSE46194)/Homer	AAACYKGTTWDACMRGTTTB	1e-26	-60.62	0	538	0.046	965	0.0282
Foxf1(Forkhead)/Lung-Foxf1-ChIP-Seq(GSE77951)/Homer	WWATRTAAACAN	1e-25	-59.47	0	1268	0.1085	2759.7	0.0805
EBF1(EBF)/Near-E2A-ChIP-Seq(GSE21512)/Homer	GTCCCCWGGGGA	1e-25	-58.88	0	1359	0.1163	2998	0.0875
Foxa2(Forkhead)/Liver-Foxa2-ChIP-Seq(GSE25694)/Homer	CYTGTTTACWYW	1e-25	-57.64	0	1032	0.0883	2175.9	0.0635
Tgif2(Homeobox)/mES-Tgif2-ChIP-Seq(GSE55404)/Homer	TGTCANYT	1e-24	-55.78	0	4043	0.3459	10345.3	0.3018
Unknown-ESC-element(?)/mES-Nanog-ChIP-Seq(GSE11724)/Homer	CACAGCAGGGGG	1e-24	-55.49	0	806	0.069	1629.2	0.0475
PBX2(Homeobox)/K562-PBX2-ChIP-Seq(Encode)/Homer	RTGATTKATRGN	1e-23	-54.13	0	1055	0.0903	2258.5	0.0659
Ets1-distal(ETS)/CD4+-PolII-ChIP-Seq(Barski_et_al.)/Homer	MACAGGAAGT	1e-21	-49.58	0	440	0.0376	790.9	0.0231
PU.1-IRF(ETS:IRF)/Bcell-PU.1-ChIP-Seq(GSE21512)/Homer	MGGAAGTGAAAC	1e-20	-47.83	0	1849	0.1582	4389.5	0.1281
Fox:Ebox(Forkhead,bHLH)/Panc1-Foxa2-ChIP-Seq(GSE47459)/Homer	NNNVCTGWGYAAACASN	1e-20	-46.26	0	1200	0.1027	2692.3	0.0785
Sox2(HMG)/mES-Sox2-ChIP-Seq(GSE11431)/Homer	BCCATTGTTC	1e-20	-46.06	0	1076	0.0921	2374.8	0.0693
NFkB-p65(RHD)/GM12787-p65-ChIP-Seq(GSE19485)/Homer	WGGGGATTTCCC	1e-19	-44.58	0	703	0.0602	1445.1	0.0422
FoxL2(Forkhead)/Ovary-FoxL2-ChIP-Seq(GSE60858)/Homer	WWTRTAAACAVG	1e-19	-43.81	0	1145	0.098	2571.1	0.075
Pbx3(Homeobox)/GM12878-PBX3-ChIP-Seq(GSE32465)/Homer	SCTGTCAMTCAN	1e-18	-43.28	0	334	0.0286	577.6	0.0169
HIC1(Zf)/Treg-ZBTB29-ChIP-Seq(GSE99889)/Homer	TGCCAGCB	1e-18	-43.04	0	2816	0.241	7088	0.2068
PU.1:IRF8(ETS:IRF)/pDC-Irf8-ChIP-Seq(GSE66899)/Homer	GGAAGTGAAAST	1e-17	-40.32	0	304	0.026	522.1	0.0152
Meis1(Homeobox)/MastCells-Meis1-ChIP-Seq(GSE48085)/Homer	VGCTGWCAVB	1e-17	-40.25	0	2166	0.1853	5336.8	0.1557
Zic3(Zf)/mES-Zic3-ChIP-Seq(GSE37889)/Homer	GGCCYCCTGCTGDGH	1e-16	-38.86	0	804	0.0688	1738.8	0.0507
IRF8(IRF)/BMDM-IRF8-ChIP-Seq(GSE77884)/Homer	GRAASTGAAAST	1e-16	-38.55	0	482	0.0412	944.5	0.0276
Elk1(ETS)/Hela-Elk1-ChIP-Seq(GSE31477)/Homer	HACTTCCGGY	1e-16	-38.37	0	894	0.0765	1971.5	0.0575
Tcf12(bHLH)/GM12878-Tcf12-ChIP-Seq(GSE32465)/Homer	VCAGCTGYTG	1e-16	-37.83	0	1254	0.1073	2912.3	0.085
IRF2(IRF)/Erythroblas-IRF2-ChIP-Seq(GSE36985)/Homer	GAAASYGAAASY	1e-16	-37.28	0	182	0.0156	270.3	0.0079
ETS(ETS)/Promoter/Homer	AACCGGAAGT	1e-15	-36.58	0	535	0.0458	1084.3	0.0316
Atoh1(bHLH)/Cerebellum-Atoh1-ChIP-Seq(GSE22111)/Homer	VNRVCAGCTGGY	1e-15	-35.69	0	1334	0.1141	3146.3	0.0918
Ascl1(bHLH)/NeuralTubes-Ascl1-ChIP-Seq(GSE55840)/Homer	NNVVCAGCTGBN	1e-15	-35.47	0	2068	0.1769	5131.1	0.1497
Rfx6(HTH)/Min6b1-Rfx6.HA-ChIP-Seq(GSE62844)/Homer	TGTTKCCTAGCAACM	1e-15	-35.22	0	1311	0.1122	3090.7	0.0902
ISRE(IRF)/ThioMac-LPS-Expression(GSE23622)/Homer	AGTTTCASTTTC	1e-15	-35.1	0	112	0.0096	138.2	0.004
Hoxb4(Homeobox)/ES-Hoxb4-ChIP-Seq(GSE34014)/Homer	TGATTRATGGCY	1e-15	-34.99	0	258	0.0221	441.6	0.0129
MyoG(bHLH)/C2C12-MyoG-ChIP-Seq(GSE36024)/Homer	AACAGCTG	1e-14	-34.32	0	1328	0.1136	3145.8	0.0918
Foxa3(Forkhead)/Liver-Foxa3-ChIP-Seq(GSE77670)/Homer	BSNTGTTTACWYWGN	1e-14	-32.75	0	436	0.0373	867.3	0.0253
IRF1(IRF)/PBMC-IRF1-ChIP-Seq(GSE43036)/Homer	GAAAGTGAAAGT	1e-14	-32.68	0	239	0.0205	408.5	0.0119
Hoxc9(Homeobox)/Ainv15-Hoxc9-ChIP-Seq(GSE21812)/Homer	GGCCATAAATCA	1e-13	-32.13	0	666	0.057	1441.8	0.0421
FOXA1(Forkhead)/LNCAP-FOXA1-ChIP-Seq(GSE27824)/Homer	WAAGTAAACA	1e-13	-32.07	0	1509	0.1291	3656.3	0.1067
Pdx1(Homeobox)/Islet-Pdx1-ChIP-Seq(SRA008281)/Homer	YCATYAATCA	1e-13	-31.79	0	1136	0.0972	2663.2	0.0777
Tcf21(bHLH)/ArterySmoothMuscle-Tcf21-ChIP-Seq(GSE61369)/Homer	NAACAGCTGG	1e-13	-31.77	0	1185	0.1014	2793.5	0.0815
Ap4(bHLH)/AML-Tfap4-ChIP-Seq(GSE45738)/Homer	NAHCAGCTGD	1e-13	-31.63	0	1481	0.1267	3586.3	0.1046
Pknox1(Homeobox)/ES-Prep1-ChIP-Seq(GSE63282)/Homer	SCTGTCAVTCAV	1e-13	-31.38	0	321	0.0275	601.2	0.0175
NF1:FOXA1(CTF,Forkhead)/LNCAP-FOXA1-ChIP-Seq(GSE27824)/Homer	WNTGTTTRYTTTGGCA	1e-13	-31.26	0	88	0.0075	102.4	0.003
Sox3(HMG)/NPC-Sox3-ChIP-Seq(GSE33059)/Homer	CCWTTGTY	1e-13	-30.9	0	2061	0.1763	5176.8	0.151
Elk4(ETS)/Hela-Elk4-ChIP-Seq(GSE31477)/Homer	NRYTTCCGGY	1e-13	-30.73	0	893	0.0764	2036.1	0.0594
Sox10(HMG)/SciaticNerve-Sox3-ChIP-Seq(GSE35132)/Homer	CCWTTGTYYB	1e-13	-30.43	0	1949	0.1668	4875.6	0.1422
Sox17(HMG)/Endoderm-Sox17-ChIP-Seq(GSE61475)/Homer	CCATTGTTYB	1e-13	-30.35	0	877	0.075	1998.9	0.0583
Sox4(HMG)/proB-Sox4-ChIP-Seq(GSE50066)/Homer	YCTTTGTTCC	1e-13	-30.09	0	1025	0.0877	2388.1	0.0697
ETS:E-box(ETS,bHLH)/HPC7-Scl-ChIP-Seq(GSE22178)/Homer	AGGAARCAGCTG	1e-12	-29.83	0	146	0.0125	218.2	0.0064
Tgif1(Homeobox)/mES-Tgif1-ChIP-Seq(GSE55404)/Homer	YTGWCADY	1e-12	-29.72	0	3622	0.3099	9569	0.2792
MafA(bZIP)/Islet-MafA-ChIP-Seq(GSE30298)/Homer	TGCTGACTCA	1e-12	-29.68	0	901	0.0771	2067.1	0.0603
FOXA1(Forkhead)/MCF7-FOXA1-ChIP-Seq(GSE26831)/Homer	WAAGTAAACA	1e-11	-27.26	0	1245	0.1065	3005.9	0.0877
Fra1(bZIP)/BT549-Fra1-ChIP-Seq(GSE46166)/Homer	NNATGASTCATH	1e-11	-26.42	0	592	0.0507	1299.6	0.0379
Sox6(HMG)/Myotubes-Sox6-ChIP-Seq(GSE32627)/Homer	CCATTGTTNY	1e-11	-26.29	0	1957	0.1675	4959.2	0.1447
Myf5(bHLH)/GM-Myf5-ChIP-Seq(GSE24852)/Homer	BAACAGCTGT	1e-11	-25.64	0	866	0.0741	2016	0.0588
MyoD(bHLH)/Myotube-MyoD-ChIP-Seq(GSE21614)/Homer	RRCAGCTGYTSY	1e-11	-25.62	0	969	0.0829	2289	0.0668
EBF2(EBF)/BrownAdipose-EBF2-ChIP-Seq(GSE97114)/Homer	NABTCCCWDGGGAVH	1e-11	-25.46	0	1089	0.0932	2609.8	0.0761
Six2(Homeobox)/NephronProgenitor-Six2-ChIP-Seq(GSE39837)/Homer	GWAAYHTGAKMC	1e-10	-25.06	0	1182	0.1011	2863.5	0.0835
RBPJ:Ebox(?,bHLH)/Panc1-Rbpj1-ChIP-Seq(GSE47459)/Homer	GGGRAARRGRMCAGMTG	1e-10	-24.8	0	414	0.0354	864.6	0.0252
NFkB-p65-Rel(RHD)/ThioMac-LPS-Expression(GSE23622)/Homer	GGAAATTCCC	1e-10	-24.43	0	110	0.0094	160.9	0.0047
SpiB(ETS)/OCILY3-SPIB-ChIP-Seq(GSE56857)/Homer	AAAGRGGAAGTG	1e-10	-23.86	0	348	0.0298	708.3	0.0207
ZNF467(Zf)/HEK293-ZNF467.GFP-ChIP-Seq(GSE58341)/Homer	TGGGGAAGGGCM	1e-09	-22.14	0	1016	0.0869	2454.2	0.0716
AP-1(bZIP)/ThioMac-PU.1-ChIP-Seq(GSE21512)/Homer	VTGACTCATC	1e-09	-21.88	0	776	0.0664	1819.3	0.0531
HOXA2(Homeobox)/mES-Hoxa2-ChIP-Seq(Donaldson_et_al.)/Homer	GYCATCMATCAT	1e-09	-21.77	0	155	0.0133	265.4	0.0077
Smad3(MAD)/NPC-Smad3-ChIP-Seq(GSE36673)/Homer	TWGTCTGV	1e-09	-21.27	0	3195	0.2734	8526	0.2488
GATA(Zf),IR4/iTreg-Gata3-ChIP-Seq(GSE20898)/Homer	NAGATWNBNATCTNN	1e-09	-21.25	0	104	0.0089	158	0.0046
FOXM1(Forkhead)/MCF7-FOXM1-ChIP-Seq(GSE72977)/Homer	TRTTTACTTW	1e-08	-20.71	0	1254	0.1073	3116.4	0.0909
NFkB-p50,p52(RHD)/Monocyte-p50-ChIP-Chip(Schreiber_et_al.)/Homer	GGGGGAATCCCC	1e-08	-20.7	0	173	0.0148	310.4	0.0091
IRF3(IRF)/BMDM-Irf3-ChIP-Seq(GSE67343)/Homer	AGTTTCAKTTTC	1e-08	-20.55	0	440	0.0376	961.2	0.028
BMYB(HTH)/Hela-BMYB-ChIP-Seq(GSE27030)/Homer	NHAACBGYYV	1e-08	-20.2	0	1779	0.1522	4567.2	0.1333
HOXA1(Homeobox)/mES-Hoxa1-ChIP-Seq(SRP084292)/Homer	TGATKGATGR	1e-08	-19.91	0	334	0.0286	700.3	0.0204
NeuroG2(bHLH)/Fibroblast-NeuroG2-ChIP-Seq(GSE75910)/Homer	ACCATCTGTT	1e-08	-19.63	0	1783	0.1526	4588	0.1339
Zic(Zf)/Cerebellum-ZIC1.2-ChIP-Seq(GSE60731)/Homer	CCTGCTGAGH	1e-08	-19.11	0	1014	0.0868	2488.5	0.0726
Atf3(bZIP)/GBM-ATF3-ChIP-Seq(GSE33912)/Homer	DATGASTCATHN	1e-08	-18.85	0	683	0.0584	1607.4	0.0469
Six1(Homeobox)/Myoblast-Six1-ChIP-Chip(GSE20150)/Homer	GKVTCADRTTWC	1e-08	-18.64	0	279	0.0239	573.3	0.0167
Smad2(MAD)/ES-SMAD2-ChIP-Seq(GSE29422)/Homer	CTGTCTGG	1e-07	-18.28	0	1911	0.1635	4969.8	0.145
NeuroD1(bHLH)/Islet-NeuroD1-ChIP-Seq(GSE30298)/Homer	GCCATCTGTT	1e-07	-18.22	0	951	0.0814	2330.7	0.068
GATA(Zf),IR3/iTreg-Gata3-ChIP-Seq(GSE20898)/Homer	NNNNNBAGATAWYATCTVHN	1e-07	-17.71	0	226	0.0193	450.9	0.0132
Sox15(HMG)/CPA-Sox15-ChIP-Seq(GSE62909)/Homer	RAACAATGGN	1e-07	-17.26	0	1367	0.117	3479.5	0.1015
Fra2(bZIP)/Striatum-Fra2-ChIP-Seq(GSE43429)/Homer	GGATGACTCATC	1e-07	-16.97	0	488	0.0418	1116.7	0.0326
Rbpj1(?)/Panc1-Rbpj1-ChIP-Seq(GSE47459)/Homer	HTTTCCCASG	1e-07	-16.96	0	1775	0.1519	4615.4	0.1347
PBX1(Homeobox)/MCF7-PBX1-ChIP-Seq(GSE28007)/Homer	GSCTGTCACTCA	1e-07	-16.77	0	119	0.0102	205.7	0.006
Tbx20(T-box)/Heart-Tbx20-ChIP-Seq(GSE29636)/Homer	GGTGYTGACAGS	1e-07	-16.22	0	261	0.0223	545.5	0.0159
