# Supplementary material for: Loss of epigenetic suppression of retrotransposons with oncogenic potential in aging mammary luminal epithelial cells
Source: HighWire-hosted journal article supplement (doi:10.1101/gr.277511.122), 2023-07-18
Supplement: Supplemental_Table_S8.xlsx [file Supplemental_Table_S8.xlsx]

## Sheet: Table_S8
Table S8: TE subfamilies significantly enriched in regions with increased methylation entropy and methylation loss
TE subfamily	log(enrichment)	pval	total number of elements	No. of overlaps	Mean of overlaps for random regions	Percentage overlaps
AluSz	0.936771	0	118033	3634	1898.4	3.0788
AluSx	0.878315	0	124945	3561	1937.19	2.85005
AluY	0.962547	0	98084	3131	1606.67	3.19216
AluSx1	0.781759	0	106483	2980	1733.34	2.79857
AluJb	0.72554	0	117273	2848	1722.39	2.42852
AluJr	0.584336	0	114124	2510	1674.06	2.19936
AluSp	0.962746	0	64572	2015	1033.86	3.12055
L2a	-0.358953	0	166340	1926	2470.09	1.15787
MIRb	-0.483264	0	223887	1804	2521.82	0.805764
AluSq2	0.891405	0	51711	1539	829.658	2.97616
MIR	-0.449176	0	174396	1469	2005.57	0.842336
L2c	-0.281235	0	126360	1377	1673.38	1.08974
AluSg	0.95747	0	42580	1343	691.59	3.15406
AluSz6	1.03264	0	40962	1303	636.926	3.181
AluSc	0.914877	0	37679	1128	598.279	2.99371
AluSx3	0.875317	0	38631	1043	568.575	2.6999
AluJo	0.631369	0	45868	965	622.969	2.10386
L2b	-0.403851	0	91943	883	1168.24	0.960378
MIRc	-0.412683	0	100994	792	1054.28	0.784205
L2	-0.269461	0	54017	700	843.75	1.29589
MIR3	-0.395702	0	87870	661	869.6	0.752248
AluSc8	0.878677	0	20437	612	332.846	2.99457
L1M5	-0.415921	0	44640	532	709.768	1.19176
L1ME1	-0.484429	0	31305	523	731.694	1.67066
L2d2	-0.300418	0	52674	475	584.963	0.901773
L1PA7	-0.846965	0	13116	428	769.849	3.26319
L1MB7	-0.293221	0	23185	418	512.206	1.80289
FLAM_C	0.766124	0	24406	417	245.194	1.7086
L3	-0.542579	0	45293	401	584.086	0.885347
AluSq	0.923206	0	12256	375	197.751	3.05973
