# Supplementary material for: Loss of epigenetic suppression of retrotransposons with oncogenic potential in aging mammary luminal epithelial cells
Source: HighWire-hosted journal article supplement (doi:10.1101/gr.277511.122), 2023-07-18
Supplement: Supplemental_Table_S9.xlsx [file Supplemental_Table_S9.xlsx]

## Sheet: Table_S9
Table S9: Genes significantly correlated with a TE in DCIS (within +/- 500kb window). The TEs show age-dependent methylation loss
Gene_Name	Correlated TE	Spearman correlation	p-value	adjusted p-value (BH)
chr2|215828669|215831137|L1PA11:L1:LINE|81|+,+	SNHG31,+	0.872164	8.88007e-12	6.27155e-09
chr7|123085244|123091266|L1PA3:L1:LINE|28|-,-	IQUB,-	0.848256	1.24763e-10	5.42237e-09
chr2|209676345|209682372|L1PA2:L1:LINE|28|+,+	PTH2R,+	0.806195	5.06575e-09	5.72429e-07
chr2|132306142|132306618|MER41-int:ERV1:LTR|152|+,+	POTEKP,+	0.775786	4.39198e-08	4.13578e-06
chr2|132306142|132306618|MER41-int:ERV1:LTR|152|+,+	LINC01087,+	0.767422	7.50853e-08	1.76763e-05
chr19|35351081|35357117|L1PA4:L1:LINE|25|+,+	LINC01801,-	0.765264	8.59227e-08	3.46759e-05
chr2|132306618|132306731|LTR33A:ERVL:LTR|216|+,+	POTEKP,+	0.75481	1.61886e-07	8.02329e-06
chr2|43317550|43317826|MLT1G1-int:ERVL-MaLR:LTR|246|-,-	LINC02580,-	0.750467	2.08712e-07	1.09187e-05
chr6|152399637|152404932|L1PA6:L1:LINE|79|+,+	CCDC170,+	0.747829	2.42938e-07	1.46021e-05
chr2|132306618|132306731|LTR33A:ERVL:LTR|216|+,+	LINC01087,+	0.744788	2.88739e-07	1.94211e-05
chr3|42920768|42921885|Tigger1:TcMar-Tigger:DNA|113|+,+	ACKR2,+	0.727675	7.31282e-07	0.000147562
chr15|25357810|25358492|L1MEc:L1:LINE|234|+,+	PWAR6,+	0.724191	8.76193e-07	0.000412541
chr10|37564808|37573023|HERV9-int:ERV1:LTR|61|-,-	ANKRD30A,+	0.724134	8.78759e-07	0.000496499
chr11|7736710|7737353|L1PA13:L1:LINE|92|-,-	OVCH2,-	0.721539	1.00363e-06	3.99333e-05
chr15|25358535|25358785|L1MEc:L1:LINE|221|+,+	PWAR6,+	0.720703	1.0472e-06	4.22618e-05
chr3|101411705|101417184|HERVK-int:ERVK:LTR|108|+,+	SENP7,-	0.719709	1.10129e-06	4.50889e-05
chrX|135809692|135809989|AluSz:Alu:SINE|101|-,-	LINC00892,+	0.718551	1.16744e-06	4.99701e-05
chr1|40538635|40538806|MER103C:hAT-Charlie:DNA|226|+,+	PPT1,-	0.71685	1.27127e-06	5.61149e-05
chr2|132306142|132306618|MER41-int:ERV1:LTR|152|+,+	C2orf27A,+	0.716628	1.28543e-06	5.76405e-05
chr2|132306142|132306618|MER41-int:ERV1:LTR|152|+,+	CCDC74A,+	0.714248	1.4466e-06	6.81108e-05
chr7|64945196|64951346|L1PA4:L1:LINE|59|+,+	LOC101929322,-	0.713123	1.52906e-06	7.32137e-05
chrX|54770568|54773917|L1M1:L1:LINE|139|-,-	ITIH6,-	0.713085	1.5319e-06	7.4614e-05
chr9|137799253|137800202|L1ME3A:L1:LINE|311|-,-	COL5A1,+	0.709995	1.78133e-06	8.98619e-05
chr2|182275533|182282007|L1PA8A:L1:LINE|121|+,+	ITGA4,+	0.707341	2.02474e-06	0.000103998
chr11|7736710|7737353|L1PA13:L1:LINE|92|-,-	LOC283299,-	0.70402	2.37198e-06	0.000139601
chr2|132306618|132306731|LTR33A:ERVL:LTR|216|+,+	CCDC74A,+	0.699081	2.98976e-06	0.000206002
chr15|25358535|25358785|L1MEc:L1:LINE|221|+,+	IPW,+	0.698955	3.00727e-06	0.000212388
chr2|43317550|43317826|MLT1G1-int:ERVL-MaLR:LTR|246|-,-	HAAO,-	0.698693	3.04407e-06	0.0002205
chr15|25541073|25542702|L1M4c:L1:LINE|203|+,+	SNORD116-6,+	0.696605	3.35193e-06	0.000255924
chr15|25541073|25542702|L1M4c:L1:LINE|203|+,+	PWAR1,+	0.694392	3.70907e-06	0.000299375
chr2|215828669|215831137|L1PA11:L1:LINE|81|+,+	FN1,-	0.693689	3.82945e-06	0.000318182
chr3|101417183|101418890|HERVK-int:ERVK:LTR|19|+,+	SENP7,-	0.690713	4.38023e-06	0.000399166
chr9|99458888|99460128|L1MD2:L1:LINE|181|+,+	LOC441455,+	0.68761	5.03046e-06	0.000546579
chr15|25357810|25358492|L1MEc:L1:LINE|234|+,+	IPW,+	0.687356	5.08763e-06	0.000598856
chr2|132306618|132306731|LTR33A:ERVL:LTR|216|+,+	C2orf27A,+	0.686948	5.18022e-06	0.000665187
chr10|37564808|37573023|HERV9-int:ERV1:LTR|61|-,-	LINC00993,+	0.680878	6.75435e-06	0.00119257
chr4|87805856|87807428|L1PA5:L1:LINE|39|-,-	C4orf36,-	0.678925	7.34643e-06	0.00159644
chr3|15451830|15452104|AluJb:Alu:SINE|153|-,-	METTL6,-	0.676226	8.243e-06	0.00258739
chr9|137799253|137800202|L1ME3A:L1:LINE|311|-,-	RXRA,+	0.67433	8.93079e-06	0.00840983
chr5|140610915|140611731|L1MEg:L1:LINE|279|+,+	PCDHB14,+	0.66912	1.10993e-05	0.000461112
chr20|57460180|57460352|L4:RTE:LINE|359|-,-	ATP5F1E,-	0.668822	1.12365e-05	0.000473777
chr6|2992577|2993086|MER54A:ERVL:LTR|199|+,+	LINC01011,+	0.663973	1.37008e-05	0.000624269
chrX|54770568|54773917|L1M1:L1:LINE|139|-,-	MAGED2,+	0.662766	1.43863e-05	0.000666253
chr19|12115626|12121630|L1PA3:L1:LINE|26|-,-	ZNF763,+	0.652655	2.14707e-05	0.00114443
chr7|64945196|64951346|L1PA4:L1:LINE|59|+,+	ZNF92,+	0.651946	2.20704e-05	0.00119902
chr1|156066093|156066275|MIR:MIR:SINE|269|+,+	MEX3A,-	0.651817	2.21809e-05	0.00122865
chr2|216277165|216277331|AluSc8:Alu:SINE|157|-,-	LINC01614,+	0.651443	2.25042e-05	0.00127149
chr15|81684275|81685002|L1MC3:L1:LINE|155|+,+	STARD5,-	0.650692	2.31675e-05	0.00133568
chr7|102739636|102739933|AluSp:Alu:SINE|84|+,+	NAPEPLD,-	0.649061	2.46677e-05	0.00151492
chr15|25541073|25542702|L1M4c:L1:LINE|203|+,+	SNORD116-21,+	0.647564	2.61222e-05	0.0016399
chr19|12115626|12121630|L1PA3:L1:LINE|26|-,-	ACP5,-	0.647191	2.64972e-05	0.00170124
chr2|215828669|215831137|L1PA11:L1:LINE|81|+,+	BARD1,-	0.645302	2.84679e-05	0.00187028
chr7|102739636|102739933|AluSp:Alu:SINE|84|+,+	RASA4,-	0.641401	3.2965e-05	0.00245069
chr15|25541073|25542702|L1M4c:L1:LINE|203|+,+	PWAR6,+	0.638986	3.6061e-05	0.00282978
chr19|12115626|12121630|L1PA3:L1:LINE|26|-,-	ZNF563,-	0.636988	3.882e-05	0.00332323
chr7|102739636|102739933|AluSp:Alu:SINE|84|+,+	LRRC17,+	0.635071	4.16442e-05	0.0036764
chr10|95280730|95286852|L1PA4:L1:LINE|50|+,+	PLCE1,+	0.632822	4.51935e-05	0.00440247
chr7|29549753|29550464|MLT1F2:ERVL-MaLR:LTR|208|-,-	PRR15,+	0.631462	4.74689e-05	0.00478927
chr1|112481849|112483254|L1PA7:L1:LINE|71|-,-	LINC01750,+	0.630039	4.99619e-05	0.00522749
chr18|4185266|4187360|L1PREC2:L1:LINE|106|-,-	DLGAP1,-	0.629293	5.13151e-05	0.00630284
chr20|57460180|57460352|L4:RTE:LINE|359|-,-	GNAS,+	0.627743	5.42332e-05	0.00729566
chr11|58638766|58644895|L1PA4:L1:LINE|50|-,-	LOC283194,-	0.626266	5.71523e-05	0.00807276
chr1|40538635|40538806|MER103C:hAT-Charlie:DNA|226|+,+	ZMPSTE24,+	0.625628	5.8457e-05	0.00869163
chr5|140610915|140611731|L1MEg:L1:LINE|279|+,+	PCDHB17P,+	0.625086	5.95856e-05	0.00935163
chr17|26721688|26722155|LTR24:ERV1:LTR|141|-,-	UNC119,-	0.623729	6.24982e-05	0.0103857
chrX|100795938|100801353|L1PA3:L1:LINE|25|+,+	BTK,-	0.619692	7.19412e-05	0.0135489
chrX|153912381|153912929|L1ME3E:L1:LINE|267|-,-	F8,-	0.617399	7.78589e-05	0.0199956
chr1|47311809|47316563|L1PA5:L1:LINE|71|+,+	CYP4Z1,+	0.615757	8.23625e-05	0.0232674
chrX|135809692|135809989|AluSz:Alu:SINE|101|-,-	CD40LG,+	0.614768	8.51869e-05	0.0300816
chr4|68297298|68298081|HAL1:L1:LINE|273|-,-	LOC101927237,-	0.609784	0.000100793	0.000109473
chr1|85564990|85566815|L1PA4:L1:LINE|29|+,+	MCOLN3,-	0.609584	0.00010147	0.000110252
chr6|18756630|18759708|HERVH-int:ERV1:LTR|96|-,-	LOC101928519,-	0.609391	0.000102127	0.000111008
chr3|101411705|101417184|HERVK-int:ERVK:LTR|108|+,+	NXPE3,+	0.608909	0.000103784	0.000112895
chr7|102739636|102739933|AluSp:Alu:SINE|84|+,+	PMPCB,+	0.606613	0.000112016	0.000121897
chrX|100795938|100801353|L1PA3:L1:LINE|25|+,+	TMEM35A,+	0.605494	0.000116234	0.000126536
chr11|7736710|7737353|L1PA13:L1:LINE|92|-,-	OR5P3,-	0.605289	0.00011702	0.000127441
chr5|179721911|179722309|MSTC:ERVL-MaLR:LTR|125|+,+	MRNIP,-	0.604926	0.00011843	0.000129026
chr12|47647241|47648435|L1PB1:L1:LINE|76|+,+	PCED1B,+	0.604574	0.000119811	0.000130581
chr2|209696291|209702457|L1PA4:L1:LINE|43|+,+	PTH2R,+	0.604092	0.000121722	0.000132715
chr11|58638766|58644895|L1PA4:L1:LINE|50|-,-	GLYATL2,-	0.602663	0.000127555	0.000139128
chr3|15451830|15452104|AluJb:Alu:SINE|153|-,-	FGD5-AS1,-	0.601234	0.000133636	0.000145818
chr6|2992577|2993086|MER54A:ERVL:LTR|199|+,+	BPHL,+	0.598058	0.000148098	0.00016166
chr2|175269186|175275210|L1PA2:L1:LINE|15|-,-	GPR155,-	0.597502	0.000150771	0.000164642
chr7|102739636|102739933|AluSp:Alu:SINE|84|+,+	SPDYE2B,+	0.59698	0.000153318	0.000167487
chr15|25541073|25542702|L1M4c:L1:LINE|203|+,+	SNORD116-11,+	0.596606	0.000155166	0.000169572
chr3|101417183|101418890|HERVK-int:ERVK:LTR|19|+,+	NXPE3,+	0.595321	0.000161666	0.000176744
chr5|140610915|140611731|L1MEg:L1:LINE|279|+,+	PCDHB13,+	0.592177	0.000178625	0.000195361
chr1|156066093|156066275|MIR:MIR:SINE|269|+,+	IQGAP3,-	0.590434	0.000188699	0.000206458
chr1|47311809|47316563|L1PA5:L1:LINE|71|+,+	CYP4X1,+	0.59036	0.000189139	0.000207019
chr19|33368681|33368985|AluSq2:Alu:SINE|92|-,-	FAAP24,+	0.589616	0.000193594	0.000211978
chr19|12115626|12121630|L1PA3:L1:LINE|26|-,-	ZNF491,+	0.589562	0.000193923	0.000212421
chr10|95280730|95286852|L1PA4:L1:LINE|50|+,+	EXOC6,+	0.589562	0.000193927	0.000212508
chr2|216277165|216277331|AluSc8:Alu:SINE|157|-,-	SNHG31,+	0.584929	0.000223933	0.000245483
chr7|64945196|64951346|L1PA4:L1:LINE|59|+,+	GUSB,-	0.584648	0.000225879	0.000247713
chr1|190339901|190340940|L1M2:L1:LINE|209|-,-	LINC01351,+	0.584195	0.00022905	0.000251288
chr15|25541073|25542702|L1M4c:L1:LINE|203|+,+	IPW,+	0.58387	0.000231348	0.000253908
chr19|35351081|35357117|L1PA4:L1:LINE|25|+,+	ZNF30,+	0.582007	0.000244928	0.000269021
chr6|150250977|150252976|L1PA16:L1:LINE|171|+,+	RAET1E-AS1,+	0.581955	0.000245318	0.000269554
chr19|21013641|21013894|AluJb:Alu:SINE|241|+,+	ZNF85,+	0.581539	0.000248452	0.000273104
chr11|58918163|58918355|MIRc:MIR:SINE|326|+,+	FAM111A-DT,-	0.578869	0.000269424	0.000296272
chr20|57460180|57460352|L4:RTE:LINE|359|-,-	CTSZ,-	0.578676	0.000271	0.000298122
chr19|12115626|12121630|L1PA3:L1:LINE|26|-,-	ZNF441,+	0.577333	0.000282197	0.00031056
chr1|47311809|47316563|L1PA5:L1:LINE|71|+,+	CYP4B1,+	0.576152	0.000292376	0.000321887
chr2|100565797|100566310|MER1A:hAT-Charlie:DNA|122|-,-	LONRF2,-	0.575656	0.000296753	0.000326833
chr11|58918163|58918355|MIRc:MIR:SINE|326|+,+	GLYATL1,+	0.573718	0.000314398	0.000346402
chr14|38376368|38377186|L1ME3A:L1:LINE|213|+,+	TTC6,+	0.573566	0.000315824	0.000348109
chr1|225467409|225468020|L1M4b:L1:LINE|208|+,+	DNAH14,+	0.571842	0.000332373	0.000366636
chr11|106094074|106100815|HERVI-int:ERV1:LTR|225|+,+	LOC101928535,+	0.571498	0.000335771	0.000370529
chr11|58918163|58918355|MIRc:MIR:SINE|326|+,+	LOC283194,-	0.571131	0.000339425	0.000374707
chr1|47311809|47316563|L1PA5:L1:LINE|71|+,+	FAAH,+	0.570622	0.00034455	0.000380513
chr12|47647241|47648435|L1PB1:L1:LINE|76|+,+	LOC105369747,-	0.570463	0.000346164	0.000382446
chr2|182275533|182282007|L1PA8A:L1:LINE|121|+,+	CERKL,-	0.570355	0.000347268	0.000383816
chrX|153911283|153912186|HAL1:L1:LINE|280|-,-	F8,-	0.569969	0.000351222	0.000388338
chr21|28287538|28288244|L2a:L2:LINE|303|-,-	CYYR1,-	0.568701	0.000364524	0.000403203
chr3|101417183|101418890|HERVK-int:ERVK:LTR|19|+,+	PDCL3P4,+	0.568397	0.000367783	0.000406967
chr7|102739636|102739933|AluSp:Alu:SINE|84|+,+	RASA4DP,-	0.567513	0.000377394	0.000417765
chr19|12115626|12121630|L1PA3:L1:LINE|26|-,-	ZNF20,-	0.567162	0.000381266	0.000422217
chr3|40672428|40676647|L1PB1:L1:LINE|102|+,+	ENTPD3,+	0.565728	0.000397476	0.000440341
chr19|35351081|35357117|L1PA4:L1:LINE|25|+,+	ZNF599,-	0.564657	0.000409989	0.000454382
chr17|26721688|26722155|LTR24:ERV1:LTR|141|-,-	SARM1,+	0.563071	0.00042915	0.000475804
chr4|11103782|11107258|L1PA5:L1:LINE|64|+,+	CLNK,-	0.562142	0.000440735	0.000488841
chr3|15451830|15452104|AluJb:Alu:SINE|153|-,-	BTD,+	0.561554	0.000448221	0.000497338
chr19|12115626|12121630|L1PA3:L1:LINE|26|-,-	ZNF833P,+	0.561172	0.000453134	0.000502988
chr15|25541073|25542702|L1M4c:L1:LINE|203|+,+	SNORD116-24,+	0.561068	0.000454481	0.000504681
chr7|29549753|29550464|MLT1F2:ERVL-MaLR:LTR|208|-,-	LOC646762,-	0.560813	0.000457805	0.000508572
chr1|68553278|68559388|L1PA6:L1:LINE|66|-,-	RPE65,-	0.560479	0.000462187	0.000513642
chrX|153912381|153912929|L1ME3E:L1:LINE|267|-,-	CMC4,-	0.559878	0.000470168	0.000522717
chr18|14273008|14274600|MSTA-int:ERVL-MaLR:LTR|244|+,+	ANKRD20A5P,+	0.559194	0.000479387	0.000533177
chr16|3179170|3179829|LTR41:ERVL:LTR|198|-,-	SRRM2-AS1,-	0.558512	0.000488742	0.000544223
chrX|153911283|153912186|HAL1:L1:LINE|280|-,-	BRCC3,+	0.558359	0.000490865	0.000546804
chr11|58638766|58644895|L1PA4:L1:LINE|50|-,-	FAM111B,+	0.557729	0.000499695	0.000556859
chr2|182275533|182282007|L1PA8A:L1:LINE|121|+,+	LINC01934,+	0.557316	0.00050555	0.000563607
chr16|3179170|3179829|LTR41:ERVL:LTR|198|-,-	FLYWCH2,+	0.556755	0.000513616	0.000572825
chr20|57460180|57460352|L4:RTE:LINE|359|-,-	VAPB,+	0.55671	0.000514261	0.00057377
chr18|14273008|14274600|MSTA-int:ERVL-MaLR:LTR|244|+,+	CYP4F35P,+	0.555557	0.000531193	0.00059313
chr20|14710218|14711597|L1MEe:L1:LINE|306|+,+	MACROD2,+	0.554434	0.000548174	0.000612576
chr3|176165943|176172086|L1PA5:L1:LINE|50|-,-	LINC01208,-	0.554169	0.000552247	0.000617371
chr19|12115626|12121630|L1PA3:L1:LINE|26|-,-	ZNF439,+	0.554077	0.000553671	0.000619208
chr19|12115626|12121630|L1PA3:L1:LINE|26|-,-	ZNF700,+	0.553937	0.000555841	0.000621881
chr11|58638766|58644895|L1PA4:L1:LINE|50|-,-	FAM111A-DT,-	0.552353	0.000580902	0.000650177
chr19|21013641|21013894|AluJb:Alu:SINE|241|+,+	ZNF737,-	0.552107	0.000584882	0.000654892
chr7|64945196|64951346|L1PA4:L1:LINE|59|+,+	LOC441242,-	0.551038	0.000602467	0.000674849
chr6|85074282|85079309|L1PA3:L1:LINE|33|-,-	LINC01611,-	0.550813	0.000606225	0.000679328
chr2|215828669|215831137|L1PA11:L1:LINE|81|+,+	ATIC,+	0.54993	0.000621175	0.000696357
chr5|140610915|140611731|L1MEg:L1:LINE|279|+,+	PCDHGA3,+	0.549604	0.000626795	0.000702936
chr15|61273174|61275110|L1MB7:L1:LINE|223|-,-	RORA-AS1,+	0.548253	0.000650499	0.000730099
chr3|40196481|40202520|L1PA3:L1:LINE|30|-,-	ENTPD3-AS1,-	0.547717	0.000660109	0.000741179
chr15|61319612|61319819|MIRb:MIR:SINE|330|-,-	RORA-AS1,+	0.547042	0.000672423	0.000755307
chr15|25541073|25542702|L1M4c:L1:LINE|203|+,+	SNORD116-12,+	0.547	0.000673186	0.000756464
chr15|25541073|25542702|L1M4c:L1:LINE|203|+,+	SNORD116-30,+	0.544427	0.000722	0.00081164
chr2|132306618|132306731|LTR33A:ERVL:LTR|216|+,+	POTEE,+	0.543334	0.000743666	0.000836328
chr5|140610915|140611731|L1MEg:L1:LINE|279|+,+	PCDHB12,+	0.543263	0.000745085	0.000838258
chr5|140610915|140611731|L1MEg:L1:LINE|279|+,+	PCDHGB3,+	0.543116	0.000748053	0.000841932
chr7|29549753|29550464|MLT1F2:ERVL-MaLR:LTR|208|-,-	LOC100506497,+	0.540421	0.000804245	0.000905536
chr5|90265556|90271683|L1PA5:L1:LINE|64|+,+	ARRDC3-AS1,+	0.539351	0.000827559	0.000932159
chr15|25541073|25542702|L1M4c:L1:LINE|203|+,+	SNORD116-20,+	0.538745	0.000841046	0.000947728
chr20|46440864|46442278|L1MB3:L1:LINE|165|+,+	SULF2,-	0.536914	0.000882928	0.000995319
chr19|12115626|12121630|L1PA3:L1:LINE|26|-,-	ZNF443,-	0.536705	0.000887827	0.00100124
chr21|28287538|28288244|L2a:L2:LINE|303|-,-	ADAMTS5,-	0.536027	0.000903881	0.00101975
chr15|25541073|25542702|L1M4c:L1:LINE|203|+,+	SNORD115-35,+	0.53524	0.000922824	0.00104154
chr12|15303482|15303683|MIR:MIR:SINE|284|-,-	H4-16,-	0.535095	0.000926373	0.00104596
chr3|38446026|38446336|AluSx:Alu:SINE|136|+,+	ACVR2B-AS1,-	0.534679	0.000936564	0.00105789
chr2|99288992|99289127|HAL1:L1:LINE|313|-,-	C2orf15,+	0.533152	0.000974838	0.00110157
chr4|87805856|87807428|L1PA5:L1:LINE|39|-,-	MAPK10,-	0.532605	0.000988867	0.00111831
chr18|14273008|14274600|MSTA-int:ERVL-MaLR:LTR|244|+,+	ZNF519,-	0.532473	0.000992289	0.00112263
chr7|102739636|102739933|AluSp:Alu:SINE|84|+,+	DPY19L2P2,-	0.531002	0.00103104	0.00116695
chr2|43317550|43317826|MLT1G1-int:ERVL-MaLR:LTR|246|-,-	OXER1,-	0.528758	0.00109278	0.00123732
chr4|87846682|87847016|HAL1:L1:LINE|306|-,-	C4orf36,-	0.526748	0.0011508	0.00130354
chr1|47311809|47316563|L1PA5:L1:LINE|71|+,+	ATPAF1,-	0.526261	0.00116526	0.00132044
chr11|124675787|124676523|Charlie3:hAT-Charlie:DNA|99|+,+	TMEM218,-	0.526016	0.00117257	0.00132926
chr1|85564990|85566815|L1PA4:L1:LINE|29|+,+	SSX2IP,-	0.525983	0.00117357	0.00133093
chr18|13466493|13466654|L1MB4:L1:LINE|197|+,+	C18orf15,+	0.525809	0.00117882	0.00133741
chr5|131681918|131685601|L1P2:L1:LINE|64|-,-	CCNI2,+	0.525455	0.00118953	0.00135011
chrX|54889068|54890695|L1P1:L1:LINE|57|+,+	FAM104B,-	0.522985	0.00126676	0.00143834
chr1|146663236|146666859|L1PA4:L1:LINE|41|-,-	PDIA3P1,+	0.521733	0.00130753	0.00148523
chr2|132306142|132306618|MER41-int:ERV1:LTR|152|+,+	POTEE,+	0.521659	0.00131	0.00148864
chr1|156066093|156066275|MIR:MIR:SINE|269|+,+	GLMP,-	0.521251	0.00132354	0.00150463
chrX|54770568|54773917|L1M1:L1:LINE|139|-,-	SNORA11,+	0.520683	0.00134265	0.00152696
chr11|58638766|58644895|L1PA4:L1:LINE|50|-,-	FAM111A,+	0.519832	0.0013717	0.00156063
chr19|21013901|21014157|AluSq2:Alu:SINE|141|+,+	ZNF85,+	0.518591	0.00141506	0.00161061
chr7|149863797|149864426|L1MA4:L1:LINE|146|-,-	ZNF467,-	0.518129	0.00143149	0.00162998
chr19|35351081|35357117|L1PA4:L1:LINE|25|+,+	SCN1B,+	0.517883	0.00144034	0.00164071
chr5|140610915|140611731|L1MEg:L1:LINE|279|+,+	LOC112267934,-	0.516491	0.00149118	0.0016993
chr3|40196481|40202520|L1PA3:L1:LINE|30|-,-	ENTPD3,+	0.51616	0.00150349	0.00171403
chr3|101411705|101417184|HERVK-int:ERVK:LTR|108|+,+	CEP97,+	0.515899	0.00151328	0.00172588
chr5|140610915|140611731|L1MEg:L1:LINE|279|+,+	PCDHA13,+	0.515673	0.00152176	0.00173626
chr15|25541073|25542702|L1M4c:L1:LINE|203|+,+	SNORD116-10,+	0.514765	0.00155639	0.00177648
chr4|140915336|140915537|L1MD:L1:LINE|237|-,-	SCOC-AS1,-	0.510538	0.00172683	0.00197182
chr19|12190881|12191186|AluY:Alu:SINE|59|+,+	ZNF763,+	0.510445	0.00173074	0.00197709
chrX|54770568|54773917|L1M1:L1:LINE|139|-,-	PFKFB1,-	0.509988	0.00175015	0.00200007
chrX|54889068|54890695|L1P1:L1:LINE|57|+,+	ITIH6,-	0.509339	0.00177806	0.00203279
chr13|33823944|33824226|AluJb:Alu:SINE|174|-,-	LINC02344,-	0.508887	0.0017977	0.00205691
chr14|38376368|38377186|L1ME3A:L1:LINE|213|+,+	LINC00517,-	0.50871	0.00180543	0.00206659
chr10|37564808|37573023|HERV9-int:ERV1:LTR|61|-,-	MTRNR2L7,-	0.507789	0.00184623	0.00211415
chr1|85564990|85566815|L1PA4:L1:LINE|29|+,+	MCOLN2,-	0.507077	0.00187833	0.00215178
chr9|99458888|99460128|L1MD2:L1:LINE|181|+,+	ZNF782,-	0.506579	0.00190104	0.00217868
chr11|58918163|58918355|MIRc:MIR:SINE|326|+,+	FAM111B,+	0.505971	0.00192912	0.00221175
chr5|140610915|140611731|L1MEg:L1:LINE|279|+,+	PCDHB8,+	0.50547	0.00195251	0.00223949
chr5|140610915|140611731|L1MEg:L1:LINE|279|+,+	PCDHGB2,+	0.505435	0.00195418	0.0022423
chr5|140610915|140611731|L1MEg:L1:LINE|279|+,+	PCDHB10,+	0.505185	0.00196594	0.00225672
chr19|35351081|35357117|L1PA4:L1:LINE|25|+,+	HPN,+	0.504663	0.00199074	0.00228705
chr21|15418920|15419292|L1MCa:L1:LINE|257|+,+	ANKRD20A11P,-	0.503935	0.00202583	0.0023283
chr20|57460180|57460352|L4:RTE:LINE|359|-,-	NPEPL1,+	0.503114	0.00206598	0.00237541
chr7|65175228|65175536|AluSx:Alu:SINE|94|-,-	GUSB,-	0.502687	0.00208713	0.00240071
chrX|115033231|115040112|Harlequin-int:ERV1:LTR|93|-,-	DANT2,-	0.502072	0.00211796	0.00243717
chr19|12115626|12121630|L1PA3:L1:LINE|26|-,-	ZNF709,-	0.501961	0.00212354	0.00244459
chr15|25357810|25358492|L1MEc:L1:LINE|234|+,+	PWAR1,+	0.501931	0.00212509	0.00244736
chrX|153912381|153912929|L1ME3E:L1:LINE|267|-,-	BRCC3,+	0.501753	0.00213412	0.00245876
chr17|26721688|26722155|LTR24:ERV1:LTR|141|-,-	FOXN1,+	0.501489	0.00214752	0.00247521
chr17|26214785|26215158|MLT2B4:ERVL:LTR|184|-,-	NLK,+	0.501017	0.00217175	0.00250519
chr1|146663236|146666859|L1PA4:L1:LINE|41|-,-	ACP6,-	0.500701	0.00218807	0.00252504
chr15|25541073|25542702|L1M4c:L1:LINE|203|+,+	SNORD115-42,+	0.500563	0.00219528	0.0025344
chr12|93604216|93609494|L1PB1:L1:LINE|95|-,-	SOCS2-AS1,-	0.500247	0.00221178	0.00255449
chr3|101411705|101417184|HERVK-int:ERVK:LTR|108|+,+	PDCL3P4,+	0.499545	0.00224881	0.00259832
chr19|12115626|12121630|L1PA3:L1:LINE|26|-,-	ZNF788P,+	0.499545	0.00224882	0.00259939
chr19|12190881|12191186|AluY:Alu:SINE|59|+,+	ZNF709,-	0.499377	0.00225777	0.0026108
chr11|58638766|58644895|L1PA4:L1:LINE|50|-,-	GLYATL1,+	0.498318	0.00231485	0.00267791
chr15|25541073|25542702|L1M4c:L1:LINE|203|+,+	SNORD116-22,+	0.49779	0.00234377	0.00271248
chr11|58918163|58918355|MIRc:MIR:SINE|326|+,+	GLYAT,-	0.497724	0.00234739	0.00271778
chr15|25358535|25358785|L1MEc:L1:LINE|221|+,+	PWAR1,+	0.497534	0.00235791	0.00273107
chr4|106989308|106995406|L1PA6:L1:LINE|72|-,-	GSTCD,+	0.497056	0.00238449	0.002763
chr12|47647241|47648435|L1PB1:L1:LINE|76|+,+	PCED1B-AS1,-	0.496724	0.00240314	0.00278575
chr12|15303482|15303683|MIR:MIR:SINE|284|-,-	C12orf60,+	0.496711	0.00240388	0.00278775
chr15|25357810|25358492|L1MEc:L1:LINE|234|+,+	SNORD116-21,+	0.495712	0.00246072	0.00285484
chr15|25541073|25542702|L1M4c:L1:LINE|203|+,+	SNORD115-16,+	0.495661	0.00246367	0.00285944
chr2|175269186|175275210|L1PA2:L1:LINE|15|-,-	SCRN3,+	0.494556	0.00252797	0.00293647
chr5|140610915|140611731|L1MEg:L1:LINE|279|+,+	PCDHB19P,+	0.493613	0.00258399	0.00300279
chr3|149129321|149131342|BLACKJACK:hAT-Blackjack:DNA|217|+,+	TM4SF1-AS1,+	0.493	0.00262099	0.00304703
chr19|33368681|33368985|AluSq2:Alu:SINE|92|-,-	LRP3,+	0.492291	0.00266441	0.00310134
chr15|25541073|25542702|L1M4c:L1:LINE|203|+,+	SNORD115-13,+	0.492044	0.00267965	0.00312037
chr18|12181636|12187779|L1PA3:L1:LINE|41|+,+	C18orf61,+	0.49162	0.00270601	0.00315236
chr2|175269186|175275210|L1PA2:L1:LINE|15|-,-	WIPF1,-	0.491182	0.00273346	0.00318566
chr2|73918748|73920870|MER57A-int:ERV1:LTR|298|+,+	ALMS1,+	0.490826	0.00275595	0.00321319
chr10|95280730|95286852|L1PA4:L1:LINE|50|+,+	FFAR4,+	0.49072	0.0027627	0.00322239
chr2|175269186|175275210|L1PA2:L1:LINE|15|-,-	H3P6,+	0.49062	0.00276909	0.00323118
chr5|140610915|140611731|L1MEg:L1:LINE|279|+,+	PCDHGA8,+	0.490522	0.00277535	0.00323982
chrX|54770568|54773917|L1M1:L1:LINE|139|-,-	FAM104B,-	0.489958	0.00281157	0.00328346
chr11|58638766|58644895|L1PA4:L1:LINE|50|-,-	DTX4,+	0.489278	0.00285572	0.0033364
chr15|25541073|25542702|L1M4c:L1:LINE|203|+,+	SNORD116-13,+	0.489104	0.00286714	0.00335112
chr3|60881917|60882867|L1MC4a:L1:LINE|267|-,-	MIR548BB,-	0.488836	0.0028848	0.00337316
chr5|140610915|140611731|L1MEg:L1:LINE|279|+,+	PCDHA1,+	0.488385	0.00291474	0.00340959
chr1|47311809|47316563|L1PA5:L1:LINE|71|+,+	TEX38,+	0.488317	0.00291924	0.00341626
chr11|124675787|124676523|Charlie3:hAT-Charlie:DNA|99|+,+	SIAE,-	0.48763	0.00296537	0.00347168
chr1|146663236|146666859|L1PA4:L1:LINE|41|-,-	BCL9,+	0.48696	0.00301097	0.00352799
chr3|40196481|40202520|L1PA3:L1:LINE|30|-,-	MYRIP,+	0.486849	0.00301865	0.00353846
chrX|54889068|54890695|L1P1:L1:LINE|57|+,+	PFKFB1,-	0.486713	0.00302796	0.00355084
chr4|87805856|87807428|L1PA5:L1:LINE|39|-,-	PTPN13,+	0.486022	0.00307589	0.00360855
chr15|25541073|25542702|L1M4c:L1:LINE|203|+,+	SNORD115-45,+	0.485405	0.00311924	0.00366093
chr5|140610915|140611731|L1MEg:L1:LINE|279|+,+	PCDHGA4,+	0.484871	0.00315718	0.003707
chr5|128620939|128627050|L1PA4:L1:LINE|56|-,-	ADAMTS19,+	0.482924	0.00329887	0.00387497
chr6|99979832|99980121|AluSc:Alu:SINE|90|+,+	LOC101927365,+	0.482587	0.00332395	0.00390606
chr5|140610915|140611731|L1MEg:L1:LINE|279|+,+	PCDHB11,+	0.48092	0.00345054	0.0040565
chr16|3179170|3179829|LTR41:ERVL:LTR|198|-,-	ZG16B,+	0.480802	0.00345965	0.0040689
chr2|73918748|73920870|MER57A-int:ERV1:LTR|298|+,+	ALMS1P1,+	0.479955	0.00352562	0.00414823
chrX|100779329|100785483|L1PA6:L1:LINE|64|+,+	TMEM35A,+	0.479191	0.00358615	0.0042212
chr11|14672008|14672205|MLT1D:ERVL-MaLR:LTR|168|+,+	SPON1,+	0.479095	0.00359379	0.00423196
chrX|54889068|54890695|L1P1:L1:LINE|57|+,+	MAGED2,+	0.478789	0.00361836	0.00426266
chr19|12115626|12121630|L1PA3:L1:LINE|26|-,-	ZNF440,+	0.478669	0.00362798	0.00427578
chr4|106989308|106995406|L1PA6:L1:LINE|72|-,-	NPNT,+	0.478486	0.00364272	0.00429494
chr5|140610915|140611731|L1MEg:L1:LINE|279|+,+	PCDHGA5,+	0.478073	0.00367628	0.00433632
chr4|124434738|124436243|L1PA5:L1:LINE|54|+,+	LINC01091,+	0.478019	0.00368068	0.00434333
chr8|102683261|102689431|L1PA4:L1:LINE|43|+,+	GRHL2,+	0.477975	0.00368428	0.0043494
chr3|42920768|42921885|Tigger1:TcMar-Tigger:DNA|113|+,+	CYP8B1,-	0.477625	0.00371294	0.00438506
chr15|25358535|25358785|L1MEc:L1:LINE|221|+,+	SNORD116-29,+	0.477492	0.00372387	0.00439981
chr9|96039330|96040117|L1ME1:L1:LINE|211|+,+	SUSD3,+	0.476103	0.00383992	0.00454453
chr7|109559096|109565288|L1PA4:L1:LINE|56|-,-	EIF3IP1,-	0.47474	0.00395675	0.00468475
chr17|26721688|26722155|LTR24:ERV1:LTR|141|-,-	TMEM199,+	0.474675	0.00396245	0.00469347
chr19|35351081|35357117|L1PA4:L1:LINE|25|+,+	ZNF181,+	0.474548	0.00397346	0.00470848
chrX|54631137|54631376|MIR:MIR:SINE|273|+,+	MAGED2,+	0.474404	0.00398603	0.00472536
chr10|101400324|101406444|L1PA5:L1:LINE|62|-,-	DNMBP-AS1,+	0.473987	0.00402261	0.00477073
chr15|25541073|25542702|L1M4c:L1:LINE|203|+,+	SNORD115-26,+	0.473921	0.0040285	0.00477972
chr15|25541073|25542702|L1M4c:L1:LINE|203|+,+	SNORD116-16,+	0.473847	0.00403501	0.00478946
chrX|54612405|54612817|L1M2:L1:LINE|217|+,+	SNORA11,+	0.473269	0.00408633	0.0048524
chr4|10011547|10012190|MER21C:ERVL:LTR|235|+,+	CLNK,-	0.472341	0.00416995	0.00495379
chr2|216277165|216277331|AluSc8:Alu:SINE|157|-,-	LINC00607,-	0.471628	0.00423518	0.00503551
chr15|25541073|25542702|L1M4c:L1:LINE|203|+,+	SNORD116-26,+	0.470611	0.00432979	0.00515017
chr16|3179170|3179829|LTR41:ERVL:LTR|198|-,-	ZNF205,+	0.470114	0.00437662	0.00520807
chr15|25541073|25542702|L1M4c:L1:LINE|203|+,+	SNORD116-14,+	0.469752	0.00441106	0.00525126
chr15|61271462|61271915|L1MB7:L1:LINE|167|-,-	RORA-AS1,+	0.469456	0.00443942	0.00528725
chr15|61271958|61273178|L1MB7:L1:LINE|167|-,-	RORA-AS1,+	0.469373	0.00444734	0.00529892
chr11|7736710|7737353|L1PA13:L1:LINE|92|-,-	OR5P2,-	0.468632	0.00451903	0.00538661
chr5|140610915|140611731|L1MEg:L1:LINE|279|+,+	PCDHGA1,+	0.467808	0.00459995	0.00548537
chr18|4185266|4187360|L1PREC2:L1:LINE|106|-,-	DLGAP1-AS5,+	0.466257	0.00475566	0.00567585
chr15|25541073|25542702|L1M4c:L1:LINE|203|+,+	SNORD116-18,+	0.465658	0.00481697	0.00575145
chr5|134333614|134339786|L1PA5:L1:LINE|63|-,-	PCBD2,+	0.465264	0.00485771	0.005805
chr15|25357810|25358492|L1MEc:L1:LINE|234|+,+	SNORD116-12,+	0.46448	0.00493954	0.00590529
chr2|100565797|100566310|MER1A:hAT-Charlie:DNA|122|-,-	CHST10,-	0.462321	0.00517126	0.00618493
chr1|43026338|43029256|L1PA8A:L1:LINE|69|+,+	ZMYND12,-	0.462047	0.00520125	0.00622343
chrX|54631137|54631376|MIR:MIR:SINE|273|+,+	PFKFB1,-	0.461695	0.00524015	0.00627264
chr2|132306618|132306731|LTR33A:ERVL:LTR|216|+,+	MZT2A,-	0.461405	0.0052723	0.0063138
chr1|50146020|50147185|L1MDa:L1:LINE|227|-,-	ELAVL4,+	0.461239	0.00529079	0.00633862
chr9|99458888|99460128|L1MD2:L1:LINE|181|+,+	ZNF510,-	0.461012	0.00531617	0.00637174
chr7|116048914|116054928|L1PA3:L1:LINE|30|+,+	TFEC,-	0.460883	0.00533067	0.00639183
chr15|25358535|25358785|L1MEc:L1:LINE|221|+,+	SNORD116-21,+	0.460164	0.00541198	0.00649208
chr17|26721688|26722155|LTR24:ERV1:LTR|141|-,-	NLK,+	0.459661	0.00546947	0.00656383
chr5|140610915|140611731|L1MEg:L1:LINE|279|+,+	PCDHB9,+	0.459571	0.00547988	0.00657912
chr3|38446026|38446336|AluSx:Alu:SINE|136|+,+	DLEC1,+	0.458799	0.00556927	0.00668928
chr16|3179170|3179829|LTR41:ERVL:LTR|198|-,-	ERVK13-1,-	0.458348	0.0056221	0.00675561
chr1|47311809|47316563|L1PA5:L1:LINE|71|+,+	CYP4A22,+	0.457795	0.00568745	0.00683704
chr2|100246060|100246442|MLT1A:ERVL-MaLR:LTR|197|-,-	TSGA10,-	0.457743	0.00569369	0.00684745
chr22|42489578|42490183|L1MC1:L1:LINE|135|+,+	NAGA,-	0.457274	0.00574966	0.00691771
chr15|25358535|25358785|L1MEc:L1:LINE|221|+,+	SNORD116-24,+	0.457205	0.00575788	0.00693056
chr5|140610915|140611731|L1MEg:L1:LINE|279|+,+	PCDHGB1,+	0.457002	0.00578236	0.00696299
chrX|100779329|100785483|L1PA6:L1:LINE|64|+,+	BTK,-	0.456987	0.00578417	0.00696814
chr9|97279822|97282763|L1PA5:L1:LINE|107|-,-	PCAT7,+	0.456341	0.00586247	0.00706548
chr5|131681918|131685601|L1P2:L1:LINE|64|-,-	MIR3936,-	0.45587	0.00592006	0.00713793
chr18|14273008|14274600|MSTA-int:ERVL-MaLR:LTR|244|+,+	POTEC,-	0.455431	0.00597428	0.00720637
chr11|124675787|124676523|Charlie3:hAT-Charlie:DNA|99|+,+	HEPACAM,-	0.455367	0.00598217	0.00721898
chr4|68297298|68298081|HAL1:L1:LINE|273|-,-	STAP1,+	0.455231	0.00599907	0.00724556
chr15|81684275|81685002|L1MC3:L1:LINE|155|+,+	IL16,+	0.455174	0.00600623	0.00725731
chrX|153911283|153912186|HAL1:L1:LINE|280|-,-	CMC4,-	0.455039	0.00602307	0.00728078
chr15|25357810|25358492|L1MEc:L1:LINE|234|+,+	SNORD116-22,+	0.4548	0.00605288	0.00731994
chr6|150250977|150252976|L1PA16:L1:LINE|171|+,+	RAET1E,-	0.454694	0.00606622	0.00733922
chr15|25357810|25358492|L1MEc:L1:LINE|234|+,+	SNORD116-24,+	0.453219	0.00625381	0.00757266
chr2|132306142|132306618|MER41-int:ERV1:LTR|152|+,+	MZT2A,-	0.453219	0.00625385	0.00757595
chr16|3179170|3179829|LTR41:ERVL:LTR|198|-,-	CASP16P,+	0.452741	0.00631571	0.00765417
chr5|128620939|128627050|L1PA4:L1:LINE|56|-,-	ISOC1,+	0.452535	0.00634248	0.00768991
chr19|12190881|12191186|AluY:Alu:SINE|59|+,+	ZNF440,+	0.452037	0.00640781	0.00777246
chr17|26721688|26722155|LTR24:ERV1:LTR|141|-,-	FAM222B,-	0.450401	0.00662619	0.00804426
chr15|25541073|25542702|L1M4c:L1:LINE|203|+,+	SNORD116-28,+	0.449901	0.00669418	0.00813029
chr2|99289122|99289218|L1M6:L1:LINE|302|-,-	C2orf15,+	0.449542	0.00674341	0.0081936
chr16|3179170|3179829|LTR41:ERVL:LTR|198|-,-	HCFC1R1,-	0.44938	0.00676565	0.00822416
chr8|124463106|124463577|L2a:L2:LINE|333|+,+	TBC1D31,+	0.448995	0.00681895	0.00829252
chrX|153912381|153912929|L1ME3E:L1:LINE|267|-,-	MPP1,-	0.448519	0.00688527	0.00837678
chr2|215828669|215831137|L1PA11:L1:LINE|81|+,+	ABCA12,-	0.447546	0.00702256	0.00854749
chr4|87846682|87847016|HAL1:L1:LINE|306|-,-	MAPK10,-	0.447481	0.00703183	0.00856247
chr19|12115626|12121630|L1PA3:L1:LINE|26|-,-	ZNF625,-	0.447387	0.00704525	0.0085825
chr4|106987669|106989335|L1MB4:L1:LINE|180|-,-	GSTCD,+	0.446241	0.00721046	0.00878756
chr3|15690152|15690635|MLT1C:ERVL-MaLR:LTR|190|+,+	METTL6,-	0.445371	0.00733801	0.00894686
chr19|33368681|33368985|AluSq2:Alu:SINE|92|-,-	NUDT19,+	0.444596	0.00745339	0.00909146
chr20|57460180|57460352|L4:RTE:LINE|359|-,-	TUBB1,+	0.444513	0.0074657	0.00911041
chr15|25541073|25542702|L1M4c:L1:LINE|203|+,+	SNORD116-25,+	0.444192	0.00751412	0.00917742
chr19|35351081|35357117|L1PA4:L1:LINE|25|+,+	CD22,+	0.443572	0.00760809	0.00929621
chr20|57460180|57460352|L4:RTE:LINE|359|-,-	NELFCD,+	0.443305	0.00764887	0.00935009
chr11|71434773|71440889|L1PA4:L1:LINE|60|+,+	LRTOMT,+	0.443237	0.00765931	0.0093669
chr15|25358535|25358785|L1MEc:L1:LINE|221|+,+	SNRPN,+	0.443229	0.00766048	0.00937239
chr4|99499578|99499871|AluSz6:Alu:SINE|106|-,-	LOC105377342,+	0.443068	0.00768521	0.00940673
chr1|20483309|20486474|HERVE-int:ERV1:LTR|139|+,+	DDOST,-	0.44289	0.00771257	0.00944431
chr8|87388515|87388827|AluSz6:Alu:SINE|115|+,+	SLC7A13,-	0.442641	0.00775102	0.00949551
chr14|38376368|38377186|L1ME3A:L1:LINE|213|+,+	FOXA1,-	0.442628	0.00775308	0.00950215
chr2|129220858|129221934|L1M4c:L1:LINE|207|+,+	LOC101927881,+	0.442255	0.00781106	0.00957737
chr1|43026338|43029256|L1PA8A:L1:LINE|69|+,+	PPCS,+	0.441684	0.00790049	0.00969122
chr15|25357810|25358492|L1MEc:L1:LINE|234|+,+	SNRPN,+	0.440118	0.00815038	0.0100108
chr15|25541073|25542702|L1M4c:L1:LINE|203|+,+	SNORD116-27,+	0.439938	0.00817946	0.0100509
chr14|53890521|53896631|L1PA6:L1:LINE|71|+,+	LOC101927620,+	0.439474	0.00825499	0.0101481
chr19|21013641|21013894|AluJb:Alu:SINE|241|+,+	ZNF66,+	0.438761	0.0083723	0.0102968
chr15|25541073|25542702|L1M4c:L1:LINE|203|+,+	SNORD115-22,+	0.438378	0.00843585	0.0103795
chr5|140610915|140611731|L1MEg:L1:LINE|279|+,+	PCDHB18P,+	0.437654	0.00855709	0.0105378
chr1|225455881|225458185|L1PA5:L1:LINE|44|+,+	DNAH14,+	0.437611	0.00856421	0.0105512
chr19|12190881|12191186|AluY:Alu:SINE|59|+,+	ZNF491,+	0.437161	0.00864038	0.0106497
chr15|25541073|25542702|L1M4c:L1:LINE|203|+,+	SNORD116-29,+	0.436699	0.00871921	0.0107515
chr8|124463106|124463577|L2a:L2:LINE|333|+,+	ATAD2,-	0.435495	0.00892742	0.0110131
chr6|119721158|119727270|L1PA4:L1:LINE|52|+,+	LOC105377975,+	0.435486	0.00892902	0.0110199
chr20|57460180|57460352|L4:RTE:LINE|359|-,-	STX16,+	0.435326	0.00895697	0.0110592
chr22|48163853|48164875|L1PB4:L1:LINE|271|+,+	LINC00898,-	0.434747	0.00905902	0.0111901
chr19|12190881|12191186|AluY:Alu:SINE|59|+,+	ZNF439,+	0.434381	0.00912382	0.0112751
chr8|124463106|124463577|L2a:L2:LINE|333|+,+	MIR548D1,-	0.433776	0.0092321	0.0114139
chr3|38446026|38446336|AluSx:Alu:SINE|136|+,+	EXOG,+	0.433543	0.00927398	0.0114707
chrX|100795938|100801353|L1PA3:L1:LINE|25|+,+	CENPI,+	0.433376	0.00930419	0.0115131
chr9|137799253|137800202|L1ME3A:L1:LINE|311|-,-	FCN2,+	0.432577	0.00944983	0.0116984
chr2|175269186|175275210|L1PA2:L1:LINE|15|-,-	CHRNA1,-	0.432394	0.00948347	0.0117452
chr15|25358535|25358785|L1MEc:L1:LINE|221|+,+	SNORD116-6,+	0.432368	0.00948817	0.0117562
chrX|54631137|54631376|MIR:MIR:SINE|273|+,+	SNORA11,+	0.4322	0.00951919	0.0117998
chr4|87847016|87847330|AluSx1:Alu:SINE|99|-,-	C4orf36,-	0.431943	0.00956661	0.0118638
chr2|99288992|99289127|HAL1:L1:LINE|313|-,-	TSGA10,-	0.431528	0.00964377	0.0119647
chrX|55971909|55974081|L1PA3:L1:LINE|43|+,+	USP51,-	0.431091	0.00972562	0.0120716
chr20|20015853|20016039|MER103C:hAT-Charlie:DNA|308|-,-	CFAP61,+	0.430831	0.00977456	0.0121376
chr12|15303482|15303683|MIR:MIR:SINE|284|-,-	MGP,-	0.430719	0.00979576	0.0121693
chr11|71434773|71440889|L1PA4:L1:LINE|60|+,+	MIR3165,-	0.429097	0.0101064	0.0125608
chr11|124675787|124676523|Charlie3:hAT-Charlie:DNA|99|+,+	SPA17,+	0.428715	0.0101808	0.0126588
chrX|54612405|54612817|L1M2:L1:LINE|217|+,+	MAGED2,+	0.428513	0.0102204	0.0127136
chr19|12190881|12191186|AluY:Alu:SINE|59|+,+	ZNF443,-	0.42846	0.0102308	0.0127321
chr9|97279822|97282763|L1PA5:L1:LINE|107|-,-	MIR2278,+	0.42737	0.0104464	0.0130062
chr7|110295191|110301289|L1PA4:L1:LINE|70|-,-	LRRN3,+	0.426698	0.0105815	0.0131802
chr19|12190881|12191186|AluY:Alu:SINE|59|+,+	ZNF788P,+	0.426646	0.0105918	0.0131989
chr7|133778010|133780984|L1PA15-16:L1:LINE|105|+,+	EXOC4,+	0.42645	0.0106315	0.0132542
chr2|132306618|132306731|LTR33A:ERVL:LTR|216|+,+	TUBA3D,+	0.426256	0.0106708	0.0133091
chr7|39047127|39053152|L1PA2:L1:LINE|23|-,-	POU6F2,+	0.425875	0.0107486	0.013412
chr14|53890521|53896631|L1PA6:L1:LINE|71|+,+	DDHD1,-	0.425349	0.0108566	0.0135528
chr16|3179170|3179829|LTR41:ERVL:LTR|198|-,-	ZNF174,+	0.424357	0.0110629	0.0138164
chr11|58918163|58918355|MIRc:MIR:SINE|326|+,+	GLYATL2,-	0.423505	0.0112428	0.0140472
chr6|150250977|150252976|L1PA16:L1:LINE|171|+,+	LRP11,-	0.423306	0.0112851	0.0141064
chr19|12190881|12191186|AluY:Alu:SINE|59|+,+	ZNF69,+	0.423243	0.0112984	0.0141292
chr21|15418920|15419292|L1MCa:L1:LINE|257|+,+	CYP4F29P,-	0.423098	0.0113294	0.0141743
chr4|87846682|87847016|HAL1:L1:LINE|306|-,-	PTPN13,+	0.422336	0.0114934	0.0143859
chr5|140610915|140611731|L1MEg:L1:LINE|279|+,+	PCDHB7,+	0.422085	0.0115478	0.0144603
chr16|3179170|3179829|LTR41:ERVL:LTR|198|-,-	PKMYT1,-	0.421386	0.0117005	0.0146581
chr15|25358535|25358785|L1MEc:L1:LINE|221|+,+	SNORD116-11,+	0.421203	0.0117408	0.0147151
chr14|38931312|38937618|L1PA8A:L1:LINE|123|-,-	LINC00639,-	0.420236	0.0119557	0.0149911
chr18|13466493|13466654|L1MB4:L1:LINE|197|+,+	MIR5190,+	0.420225	0.011958	0.0150007
chr17|26721688|26722155|LTR24:ERV1:LTR|141|-,-	POLDIP2,-	0.420193	0.0119653	0.0150165
chr19|21013641|21013894|AluJb:Alu:SINE|241|+,+	ZNF714,+	0.419354	0.0121545	0.0152607
chr9|96039330|96040117|L1ME1:L1:LINE|211|+,+	ZNF484,-	0.418483	0.0123534	0.0155173
chr6|150250977|150252976|L1PA16:L1:LINE|171|+,+	LOC645967,+	0.41846	0.0123587	0.0155309
chr2|132306142|132306618|MER41-int:ERV1:LTR|152|+,+	TUBA3D,+	0.418223	0.0124134	0.0156065
chr3|149129321|149131342|BLACKJACK:hAT-Blackjack:DNA|217|+,+	CP,-	0.418087	0.012445	0.0156532
chr6|57199666|57205669|L1PA3:L1:LINE|30|+,+	MIR548U,+	0.418058	0.0124517	0.0156687
chrX|153912381|153912929|L1ME3E:L1:LINE|267|-,-	DNASE1L1,-	0.417707	0.0125332	0.0157853
chrX|100795938|100801353|L1PA3:L1:LINE|25|+,+	ARMCX4,+	0.417614	0.0125548	0.0158195
chr5|131681918|131685601|L1P2:L1:LINE|64|-,-	SHROOM1,-	0.417565	0.0125662	0.0158409
chr4|87847016|87847330|AluSx1:Alu:SINE|99|-,-	MAPK10,-	0.417171	0.0126586	0.0159645
chr10|17471900|17472862|L1PB3:L1:LINE|116|-,-	CUBN,-	0.416958	0.0127087	0.0160349
chr19|12190881|12191186|AluY:Alu:SINE|59|+,+	ZNF563,-	0.416787	0.0127489	0.0160928
chr14|66202761|66202988|MIR:MIR:SINE|296|+,+	FUT8-AS1,-	0.416629	0.0127864	0.0161473
chr1|156066093|156066275|MIR:MIR:SINE|269|+,+	PMF1,+	0.416106	0.0129109	0.0163118
chr9|97279822|97282763|L1PA5:L1:LINE|107|-,-	MIRLET7F1,+	0.416085	0.0129158	0.0163253
chr3|101411705|101417184|HERVK-int:ERVK:LTR|108|+,+	IMPG2,-	0.41572	0.0130032	0.0164431
chr16|3179170|3179829|LTR41:ERVL:LTR|198|-,-	BICDL2,-	0.415359	0.0130903	0.0165607
chr10|7896880|7897764|HAL1:L1:LINE|269|+,+	GATA3,+	0.414942	0.0131913	0.0167034
chr17|26214785|26215158|MLT2B4:ERVL:LTR|184|-,-	IFT20,-	0.41478	0.0132308	0.016761
chr3|101417183|101418890|HERVK-int:ERVK:LTR|19|+,+	CEP97,+	0.413783	0.0134756	0.0170864
chr2|99289122|99289218|L1M6:L1:LINE|302|-,-	TSGA10,-	0.413652	0.0135082	0.0171355
chr9|99458888|99460128|L1MD2:L1:LINE|181|+,+	ZNF367,-	0.413464	0.0135548	0.0172023
chr19|33368681|33368985|AluSq2:Alu:SINE|92|-,-	CEBPA,-	0.413449	0.0135585	0.0172147
chr16|3179170|3179829|LTR41:ERVL:LTR|198|-,-	PRSS27,-	0.412251	0.0138595	0.0176048
chr15|25541073|25542702|L1M4c:L1:LINE|203|+,+	PWAR5,+	0.412072	0.013905	0.0176706
chrX|54612844|54613667|L1M2:L1:LINE|217|+,+	SNORA11,+	0.411425	0.0140702	0.0178886
chr3|149129321|149131342|BLACKJACK:hAT-Blackjack:DNA|217|+,+	HPS3,+	0.410905	0.0142043	0.0180671
chr4|87805856|87807428|L1PA5:L1:LINE|39|-,-	AFF1-AS1,-	0.410179	0.0143933	0.0183159
chr20|14710218|14711597|L1MEe:L1:LINE|306|+,+	MACROD2-AS1,-	0.409091	0.0146803	0.0186978
chrX|57205363|57209428|L1PREC2:L1:LINE|138|+,+	SPIN3,-	0.408887	0.0147347	0.0187756
chr8|117686641|117687011|Charlie25:hAT-Charlie:DNA|277|-,-	LINC00536,-	0.408819	0.0147529	0.0188073
chr3|15690152|15690635|MLT1C:ERVL-MaLR:LTR|190|+,+	CAPN7,+	0.40869	0.0147875	0.0188599
chr5|134333614|134339786|L1PA5:L1:LINE|63|-,-	PITX1,-	0.408638	0.0148014	0.0188862
chr2|100246060|100246442|MLT1A:ERVL-MaLR:LTR|197|-,-	C2orf15,+	0.40856	0.0148223	0.0189214
chr17|26721688|26722155|LTR24:ERV1:LTR|141|-,-	FLOT2,-	0.408167	0.0149281	0.019065
chr7|65175228|65175536|AluSx:Alu:SINE|94|-,-	LOC101929322,-	0.407542	0.0150974	0.01929
chr10|9025594|9026195|L1PA3:L1:LINE|25|-,-	LOC101928272,-	0.40719	0.0151935	0.0194216
chr19|35351081|35357117|L1PA4:L1:LINE|25|+,+	ZNF302,+	0.406395	0.0154127	0.0197196
chr12|93604216|93609494|L1PB1:L1:LINE|95|-,-	LINC02412,+	0.406191	0.0154693	0.019801
chr5|140610915|140611731|L1MEg:L1:LINE|279|+,+	PCDHAC2,+	0.406113	0.015491	0.0198378
chr11|58638766|58644895|L1PA4:L1:LINE|50|-,-	MPEG1,-	0.405584	0.015639	0.0200454
chr3|125518093|125519118|LTR5A:ERVK:LTR|92|-,-	LOC105374312,+	0.405298	0.0157191	0.0201573
chr11|124675787|124676523|Charlie3:hAT-Charlie:DNA|99|+,+	SLC37A2,+	0.404798	0.0158606	0.020348
chr9|119271294|119277412|L1PA5:L1:LINE|69|-,-	ASTN2-AS1,+	0.404791	0.0158628	0.02036
chr19|35351081|35357117|L1PA4:L1:LINE|25|+,+	ZNF30-AS1,-	0.404554	0.0159301	0.0204557
chr3|15451830|15452104|AluJb:Alu:SINE|153|-,-	MIR563,+	0.404483	0.0159503	0.0204909
chr19|12115626|12121630|L1PA3:L1:LINE|26|-,-	ZNF627,+	0.404175	0.0160385	0.0206136
chr15|25357810|25358492|L1MEc:L1:LINE|234|+,+	SNORD116-6,+	0.403634	0.0161941	0.0208231
chr10|95280730|95286852|L1PA4:L1:LINE|50|+,+	RBP4,-	0.402997	0.016379	0.0210801
chr15|25357810|25358492|L1MEc:L1:LINE|234|+,+	SNORD116-11,+	0.402413	0.0165503	0.0213199
chr3|125518093|125519118|LTR5A:ERVK:LTR|92|-,-	ALDH1L1,-	0.402375	0.0165613	0.0213438
chr18|13466493|13466654|L1MB4:L1:LINE|197|+,+	LDLRAD4,+	0.402205	0.0166113	0.0214181
chr15|25357810|25358492|L1MEc:L1:LINE|234|+,+	SNORD116-28,+	0.401957	0.0166849	0.0215325
chr19|35351081|35357117|L1PA4:L1:LINE|25|+,+	ZNF792,-	0.401571	0.0167994	0.0216903
chr15|25358535|25358785|L1MEc:L1:LINE|221|+,+	SNORD116-27,+	0.401127	0.0169323	0.0218718
chr13|45030200|45030722|LTR12:ERV1:LTR|91|-,-	TSC22D1-AS1,+	0.400869	0.0170095	0.0219817
chr10|95280730|95286852|L1PA4:L1:LINE|50|+,+	SLC35G1,+	0.39989	0.0173067	0.0224066
chrX|46341464|46343820|L1PA6:L1:LINE|72|-,-	LINC01545,-	0.398803	0.0176413	0.0228503
chr3|140079548|140082354|L1MB8:L1:LINE|224|+,+	CLSTN2-AS1,-	0.39804	0.0178793	0.02318
chr1|43026338|43029256|L1PA8A:L1:LINE|69|+,+	ERMAP,+	0.397614	0.0180136	0.0233648
chr5|140610915|140611731|L1MEg:L1:LINE|279|+,+	PCDHB5,+	0.397399	0.0180816	0.0234637
chr22|48233883|48234120|L1ME3C:L1:LINE|274|+,+	LINC00898,-	0.39729	0.0181163	0.0235195
chr4|140915336|140915537|L1MD:L1:LINE|237|-,-	LOC101927516,+	0.397149	0.0181609	0.0235991
chr17|26214785|26215158|MLT2B4:ERVL:LTR|184|-,-	VTN,-	0.396721	0.0182975	0.0237876
chr15|25358535|25358785|L1MEc:L1:LINE|221|+,+	SNORD116-12,+	0.396138	0.0184847	0.0240531
chr1|225467409|225468020|L1M4b:L1:LINE|208|+,+	SRP9,+	0.395891	0.0185648	0.0241684
chrX|100779329|100785483|L1PA6:L1:LINE|64|+,+	CENPI,+	0.395856	0.018576	0.0241942
chr3|101417183|101418890|HERVK-int:ERVK:LTR|19|+,+	IMPG2,-	0.394966	0.0188663	0.0245837
chr17|26214785|26215158|MLT2B4:ERVL:LTR|184|-,-	TMEM199,+	0.394728	0.0189446	0.024697
chr15|25357810|25358492|L1MEc:L1:LINE|234|+,+	SNORD116-14,+	0.393812	0.0192484	0.0251047
chr1|43026338|43029256|L1PA8A:L1:LINE|69|+,+	SLC2A1-AS1,+	0.393395	0.0193879	0.0253217
chr6|80999125|81000000|L1P4a:L1:LINE|233|+,+	TTK,+	0.393309	0.0194167	0.025371
chr12|93604216|93609494|L1PB1:L1:LINE|95|-,-	PLEKHG7,+	0.393233	0.0194424	0.0254164
chr4|106989308|106995406|L1PA6:L1:LINE|72|-,-	LOC101929577,-	0.392754	0.0196041	0.0256515
chr7|102739636|102739933|AluSp:Alu:SINE|84|+,+	FAM185A,+	0.392434	0.0197127	0.0258056
chr21|15418920|15419292|L1MCa:L1:LINE|257|+,+	LOC110091776,-	0.392275	0.019767	0.0258887
chr5|140610915|140611731|L1MEg:L1:LINE|279|+,+	PCDHA12,+	0.391941	0.0198813	0.0260504
chr1|156066093|156066275|MIR:MIR:SINE|269|+,+	LAMTOR2,+	0.39158	0.0200055	0.0262254
chr7|133777696|133777990|L1PA15-16:L1:LINE|104|+,+	AKR1B10,+	0.39157	0.0200088	0.0262419
chr15|25358535|25358785|L1MEc:L1:LINE|221|+,+	SNORD115-45,+	0.391298	0.0201028	0.0263896
chr15|25541073|25542702|L1M4c:L1:LINE|203|+,+	SNORD115-20,+	0.391007	0.0202037	0.0265344
chr7|102739636|102739933|AluSp:Alu:SINE|84|+,+	UPK3BL1,-	0.390668	0.020322	0.0267021
chr8|87388515|87388827|AluSz6:Alu:SINE|115|+,+	ATP6V0D2,+	0.390554	0.0203616	0.0267666
chrX|57205363|57209428|L1PREC2:L1:LINE|138|+,+	SPIN2B,-	0.390256	0.0204662	0.0269167
chr11|58918163|58918355|MIRc:MIR:SINE|326|+,+	MPEG1,-	0.389829	0.0206166	0.0271271
chr9|97279822|97282763|L1PA5:L1:LINE|107|-,-	FBP1,-	0.389657	0.0206777	0.0272328
chr19|12115626|12121630|L1PA3:L1:LINE|26|-,-	ZNF799,-	0.389422	0.0207609	0.0273552
chr10|64362509|64368514|L1PA2:L1:LINE|19|-,-	ADO,+	0.388891	0.0209504	0.0276178
chr1|43026338|43029256|L1PA8A:L1:LINE|69|+,+	ZNF691,+	0.388836	0.0209702	0.0276568
chr10|17471900|17472862|L1PB3:L1:LINE|116|-,-	TRDMT1,-	0.388346	0.0211462	0.027915
chr1|156066093|156066275|MIR:MIR:SINE|269|+,+	RAB25,+	0.388041	0.0212567	0.028074
chr17|26721688|26722155|LTR24:ERV1:LTR|141|-,-	TLCD1,-	0.387962	0.0212854	0.0281249
chr17|26721688|26722155|LTR24:ERV1:LTR|141|-,-	ERAL1,+	0.387681	0.0213874	0.028273
chr1|20483309|20486474|HERVE-int:ERV1:LTR|139|+,+	PLA2G2D,-	0.387638	0.0214031	0.0283069
chr2|1467673|1470879|L1PB1:L1:LINE|77|-,-	TPO,+	0.387254	0.0215434	0.028506
chr5|131681918|131685601|L1P2:L1:LINE|64|-,-	SOWAHA,+	0.387061	0.0216144	0.0286132
chr15|25358535|25358785|L1MEc:L1:LINE|221|+,+	PWAR5,+	0.38623	0.0219215	0.0290471
chr5|140610915|140611731|L1MEg:L1:LINE|279|+,+	PCDHGA2,+	0.385917	0.0220384	0.0292156
chr19|12190881|12191186|AluY:Alu:SINE|59|+,+	ZNF20,-	0.385501	0.0221942	0.029436
chrX|153911283|153912186|HAL1:L1:LINE|280|-,-	LAGE3,-	0.38533	0.0222583	0.0295349
chr6|122815761|122819257|L1PA15-16:L1:LINE|218|+,+	PKIB,+	0.385138	0.022331	0.0296453
chr1|20483309|20486474|HERVE-int:ERV1:LTR|139|+,+	CDA,+	0.384923	0.0224121	0.0297809
chr15|25357810|25358492|L1MEc:L1:LINE|234|+,+	PWAR5,+	0.384842	0.0224431	0.0298361
chr1|146663236|146666859|L1PA4:L1:LINE|41|-,-	LINC00624,-	0.383414	0.02299	0.0305776
chr3|40672428|40676647|L1PB1:L1:LINE|102|+,+	EIF1B-AS1,-	0.383349	0.023015	0.0306252
chr18|14273008|14274600|MSTA-int:ERVL-MaLR:LTR|244|+,+	CXADRP3,-	0.383126	0.0231018	0.0307552
chr1|40538635|40538806|MER103C:hAT-Charlie:DNA|226|+,+	ZFP69,+	0.382136	0.0234887	0.0312851
chr15|67728517|67731941|L1PBa1:L1:LINE|88|+,+	IQCH-AS1,-	0.382075	0.023513	0.0313321
chr21|44352917|44353504|Harlequin-int:ERV1:LTR|72|+,+	RSPH1,-	0.381507	0.0237377	0.0316466
chr3|15228172|15234206|L1PA3:L1:LINE|23|+,+	BTD,+	0.380787	0.024025	0.0320447
chr5|140610915|140611731|L1MEg:L1:LINE|279|+,+	PCDHB2,+	0.38001	0.0243383	0.0324932
chr21|38452125|38453206|L1ME3F:L1:LINE|265|-,-	TTC3,+	0.379015	0.0247448	0.0330515
chr14|38376368|38377186|L1ME3A:L1:LINE|213|+,+	MIPOL1,+	0.37866	0.024891	0.0332625
chr19|33368681|33368985|AluSq2:Alu:SINE|92|-,-	CEBPA-DT,+	0.378483	0.0249644	0.0333764
chr1|20483309|20486474|HERVE-int:ERV1:LTR|139|+,+	PLA2G2A,-	0.378421	0.02499	0.0334264
chr19|21013901|21014157|AluSq2:Alu:SINE|141|+,+	ZNF737,-	0.377953	0.0251844	0.0337025
chr11|71434773|71440889|L1PA4:L1:LINE|60|+,+	LOC100133315,-	0.377931	0.0251937	0.0337309
chr4|5352820|5356007|L1MA4A:L1:LINE|176|+,+	EVC,+	0.377839	0.0252323	0.0337986
chr1|84186370|84187168|L1ME3:L1:LINE|237|-,-	LOC101927560,-	0.377751	0.0252691	0.033864
chr1|47311809|47316563|L1PA5:L1:LINE|71|+,+	CYP4A11,-	0.376556	0.025773	0.034572
chr11|58638766|58644895|L1PA4:L1:LINE|50|-,-	GLYATL1B,+	0.376461	0.0258135	0.0346429
chr15|25541073|25542702|L1M4c:L1:LINE|203|+,+	SNORD115-8,+	0.375761	0.026113	0.0350947
chr12|15303482|15303683|MIR:MIR:SINE|284|-,-	PTPRO,+	0.375146	0.0263784	0.0354683
chr10|101400324|101406444|L1PA5:L1:LINE|62|-,-	COX15,-	0.375123	0.0263882	0.0354984
chr5|131681918|131685601|L1P2:L1:LINE|64|-,-	SEPTIN8,-	0.374842	0.0265101	0.0356793
chr11|58638766|58644895|L1PA4:L1:LINE|50|-,-	GLYAT,-	0.374828	0.0265163	0.0357048
chr20|8476367|8476751|L2a:L2:LINE|352|+,+	PLCB1-IT1,+	0.374707	0.0265692	0.035793
chr5|131681918|131685601|L1P2:L1:LINE|64|-,-	LOC105379176,-	0.374175	0.0268018	0.0361237
chr21|44352917|44353504|Harlequin-int:ERV1:LTR|72|+,+	SLC37A1,+	0.373711	0.027006	0.0364162
chr16|3179170|3179829|LTR41:ERVL:LTR|198|-,-	NLRC3,-	0.373563	0.0270716	0.036522
chrX|101995220|101995824|L1M1:L1:LINE|137|+,+	TMSB15A,-	0.373086	0.0272833	0.0368253
chrX|153911283|153912186|HAL1:L1:LINE|280|-,-	MPP1,-	0.372247	0.0276596	0.0373511
chr15|25357810|25358492|L1MEc:L1:LINE|234|+,+	SNORD116-29,+	0.371207	0.0281316	0.0380065
chr3|40196481|40202520|L1PA3:L1:LINE|30|-,-	EIF1B-AS1,-	0.370894	0.028275	0.0382186
chr18|14273008|14274600|MSTA-int:ERVL-MaLR:LTR|244|+,+	ANKRD30B,+	0.370806	0.0283152	0.0382912
chr4|87846682|87847016|HAL1:L1:LINE|306|-,-	AFF1,+	0.370069	0.0286552	0.0387882
chr7|77560131|77561226|L1ME3C:L1:LINE|244|+,+	RSBN1L,+	0.369551	0.0288965	0.0391336
chr5|140610915|140611731|L1MEg:L1:LINE|279|+,+	PCDHB3,+	0.36931	0.0290093	0.0393052
chr3|125518093|125519118|LTR5A:ERVK:LTR|92|-,-	SNX4,-	0.369124	0.0290967	0.0394425
chr1|43026338|43029256|L1PA8A:L1:LINE|69|+,+	RIMKLA,+	0.368644	0.0293229	0.0397873
chr3|125518093|125519118|LTR5A:ERVK:LTR|92|-,-	MIR548I1,-	0.368486	0.0293976	0.0399079
chr17|26721688|26722155|LTR24:ERV1:LTR|141|-,-	NEK8,+	0.368274	0.0294982	0.0400637
chr2|73918748|73920870|MER57A-int:ERV1:LTR|298|+,+	NOTO,+	0.36822	0.0295237	0.0401176
chr2|1470879|1471175|AluSq:Alu:SINE|112|-,-	TPO,+	0.368155	0.0295547	0.040179
chr3|125518093|125519118|LTR5A:ERVK:LTR|92|-,-	LINC02614,-	0.367893	0.0296795	0.0403681
chr5|140610915|140611731|L1MEg:L1:LINE|279|+,+	PCDHB16,+	0.367673	0.0297846	0.0405306
chrX|55986667|55986970|AluSp:Alu:SINE|122|+,+	USP51,-	0.367584	0.0298273	0.0406083
chr10|17471900|17472862|L1PB3:L1:LINE|116|-,-	ST8SIA6-AS1,+	0.367324	0.0299523	0.0407981
chr1|50146020|50147185|L1MDa:L1:LINE|227|-,-	AGBL4-IT1,-	0.367295	0.0299662	0.0408368
chr15|25358535|25358785|L1MEc:L1:LINE|221|+,+	SNORD116-20,+	0.36725	0.029988	0.0408861
chr22|42489578|42490183|L1MC1:L1:LINE|135|+,+	NFAM1,-	0.366746	0.0302317	0.0412384
chr2|129220858|129221934|L1M4c:L1:LINE|207|+,+	HS6ST1,-	0.366538	0.0303324	0.0413957
chr19|12115626|12121630|L1PA3:L1:LINE|26|-,-	ZNF823,-	0.366216	0.0304894	0.04163
chr16|3179170|3179829|LTR41:ERVL:LTR|198|-,-	ZNF75A,+	0.366031	0.0305795	0.0417935
chr9|96039330|96040117|L1ME1:L1:LINE|211|+,+	FGD3,+	0.365793	0.0306962	0.0419732
chr20|46440864|46442278|L1MB3:L1:LINE|165|+,+	LINC01522,-	0.365736	0.0307244	0.0420525
chr15|25541073|25542702|L1M4c:L1:LINE|203|+,+	SNORD116-19,+	0.365147	0.0310147	0.0424704
chr4|25165369|25167036|MER89-int:ERV1:LTR|257|+,+	SEPSECS,-	0.364764	0.0312048	0.0427722
chr11|58638766|58644895|L1PA4:L1:LINE|50|-,-	LPXN,-	0.364707	0.0312334	0.0428322
chrX|153912381|153912929|L1ME3E:L1:LINE|267|-,-	LAGE3,-	0.364011	0.0315814	0.0433305
chr1|47311809|47316563|L1PA5:L1:LINE|71|+,+	EFCAB14,-	0.363624	0.0317762	0.0436189
chr19|12190881|12191186|AluY:Alu:SINE|59|+,+	ZNF564,-	0.363606	0.0317854	0.0436528
chr12|15303482|15303683|MIR:MIR:SINE|284|-,-	SMCO3,-	0.363324	0.0319279	0.0439126
chr12|15303482|15303683|MIR:MIR:SINE|284|-,-	RERG-AS1,+	0.362897	0.0321449	0.0442325
chrX|46341464|46343820|L1PA6:L1:LINE|72|-,-	ZNF674-AS1,+	0.362814	0.0321872	0.0443123
chr7|65175228|65175536|AluSx:Alu:SINE|94|-,-	ZNF92,+	0.362751	0.0322197	0.0443787
chr10|17471900|17472862|L1PB3:L1:LINE|116|-,-	STAM-AS1,-	0.362266	0.0324682	0.0447427
chrX|115033231|115040112|Harlequin-int:ERV1:LTR|93|-,-	DANT1,+	0.362005	0.0326023	0.0449495
chr12|93604216|93609494|L1PB1:L1:LINE|95|-,-	NUDT4,+	0.361953	0.0326294	0.0450088
chr3|101411705|101417184|HERVK-int:ERVK:LTR|108|+,+	ZBTB11-AS1,+	0.360541	0.0333645	0.0460678
chr12|47647241|47648435|L1PB1:L1:LINE|76|+,+	AMIGO2,-	0.359919	0.0336926	0.0465664
chr5|140610915|140611731|L1MEg:L1:LINE|279|+,+	PCDHA9,+	0.358917	0.0342266	0.0473507
chr5|140610915|140611731|L1MEg:L1:LINE|279|+,+	PCDHGA7,+	0.35826	0.0345809	0.0478643
chr19|12190881|12191186|AluY:Alu:SINE|59|+,+	ZNF700,+	0.357543	0.0349701	0.0484505
chr4|140914993|140915338|L1MB8:L1:LINE|220|-,-	LOC101927516,+	0.357501	0.0349933	0.0485065
chr15|25541073|25542702|L1M4c:L1:LINE|203|+,+	SNORD115-5,+	0.356954	0.0352932	0.0490424
chr15|25357810|25358492|L1MEc:L1:LINE|234|+,+	SNORD115-45,+	0.356074	0.03578	0.0497434
chr12|47647241|47648435|L1PB1:L1:LINE|76|+,+	SLC38A4,-	0.355826	0.0359182	0.0499601
chr4|140902583|140904532|L1MC3:L1:LINE|194|-,-	LOC101927516,+	0.355825	0.0359185	0.0499851
chr2|99288992|99289127|HAL1:L1:LINE|313|-,-	COA5,-	0.346341	0.0415368
chr22|19777386|19777896|L1M7:L1:LINE|271|+,+	SEPT5-GP1BB,+	0.34622	0.0416123
chr7|133778010|133780984|L1PA15-16:L1:LINE|105|+,+	LRGUK,+	0.346108	0.0416831
chr1|40538635|40538806|MER103C:hAT-Charlie:DNA|226|+,+	ZNF684,+	0.34594	0.0417891
chr3|15451830|15452104|AluJb:Alu:SINE|153|-,-	CAPN7,+	0.345626	0.0419877
chr7|149863797|149864426|L1MA4:L1:LINE|146|-,-	ATP6V0E2,+	0.345609	0.0419983
chr8|124463106|124463577|L2a:L2:LINE|333|+,+	ZHX1,-	0.345524	0.0420522
chr3|58906119|58908077|L1MEf:L1:LINE|246|-,-	ACOX2,-	0.345357	0.0421577
chr5|140610915|140611731|L1MEg:L1:LINE|279|+,+	PCDHGA9,+	0.344998	0.0423864
chr7|29549753|29550464|MLT1F2:ERVL-MaLR:LTR|208|-,-	CHN2,+	0.344298	0.0428354
chr13|33823944|33824226|AluJb:Alu:SINE|174|-,-	KL,+	0.343755	0.0431856
chrX|64396449|64399298|L1PA7:L1:LINE|97|+,+	ZC3H12B,+	0.343389	0.0434235
chr19|12190881|12191186|AluY:Alu:SINE|59|+,+	ZNF833P,+	0.343264	0.0435047
chr15|25541073|25542702|L1M4c:L1:LINE|203|+,+	SNORD116-17,+	0.343096	0.0436144
chr11|71434773|71440889|L1PA4:L1:LINE|60|+,+	SHANK2,-	0.342925	0.0437263
chr4|106987669|106989335|L1MB4:L1:LINE|180|-,-	LOC101929577,-	0.342855	0.0437718
chr7|123085244|123091266|L1PA3:L1:LINE|28|-,-	HYAL4,+	0.342177	0.0442173
chr15|67728517|67731941|L1PBa1:L1:LINE|88|+,+	MAP2K5,+	0.341724	0.0445177
chr15|25541073|25542702|L1M4c:L1:LINE|203|+,+	SNORD116-8,+	0.340855	0.0450971
chr1|156066093|156066275|MIR:MIR:SINE|269|+,+	NAXE,+	0.340736	0.0451768
chr7|102739636|102739933|AluSp:Alu:SINE|84|+,+	LOC101927870,+	0.340637	0.045244
chr15|25541073|25542702|L1M4c:L1:LINE|203|+,+	SNORD115-43,+	0.340204	0.0455359
chr15|25358535|25358785|L1MEc:L1:LINE|221|+,+	SNORD116-13,+	0.339958	0.0457023
chr15|25357810|25358492|L1MEc:L1:LINE|234|+,+	SNORD116-20,+	0.339786	0.0458191
chr15|25357810|25358492|L1MEc:L1:LINE|234|+,+	SNORD116-27,+	0.338997	0.0463571
chrX|54770568|54773917|L1M1:L1:LINE|139|-,-	MTRNR2L10,-	0.338355	0.0467993
chr19|12115626|12121630|L1PA3:L1:LINE|26|-,-	ZNF69,+	0.33791	0.0471077
chr1|68553278|68559388|L1PA6:L1:LINE|66|-,-	DEPDC1,-	0.33768	0.0472677
chr4|99499578|99499871|AluSz6:Alu:SINE|106|-,-	STPG2,-	0.337481	0.047406
chrX|54612405|54612817|L1M2:L1:LINE|217|+,+	PFKFB1,-	0.337222	0.0475871
chr3|38446026|38446336|AluSx:Alu:SINE|136|+,+	SCN5A,-	0.336714	0.0479443
chrX|57209461|57209660|L1PREC2:L1:LINE|138|+,+	SPIN2A,-	0.336555	0.0480565
chr7|133778010|133780984|L1PA15-16:L1:LINE|105|+,+	AKR1B10,+	0.336479	0.04811
chr17|26721688|26722155|LTR24:ERV1:LTR|141|-,-	PIGS,-	0.336468	0.0481181
chrX|100779329|100785483|L1PA6:L1:LINE|64|+,+	ZMAT1,-	0.33623	0.0482862
chr19|12190881|12191186|AluY:Alu:SINE|59|+,+	ZNF490,-	0.335784	0.0486026
chr7|102739636|102739933|AluSp:Alu:SINE|84|+,+	FBXL13,-	0.335599	0.0487347
chr9|119271294|119277412|L1PA5:L1:LINE|69|-,-	PAPPA-AS1,-	0.33536	0.0489058
chr9|96037695|96039037|L1ME1:L1:LINE|215|+,+	SUSD3,+	0.335307	0.0489434
chr4|4799474|4801232|L1ME1:L1:LINE|237|+,+	NSG1,+	0.33512	0.049078
chr4|4799474|4801232|L1ME1:L1:LINE|237|+,+	CYTL1,-	0.334723	0.0493633
chr19|35351081|35357117|L1PA4:L1:LINE|25|+,+	SCGB2B3P,+	0.334616	0.0494407
chr15|25358535|25358785|L1MEc:L1:LINE|221|+,+	SNORD116-30,+	0.334513	0.0495151
chr7|123085244|123091266|L1PA3:L1:LINE|28|-,-	SLC13A1,-	0.334502	0.0495227
chr14|66202761|66202988|MIR:MIR:SINE|296|+,+	MIR625,+	0.334324	0.049652
chr22|42489578|42490183|L1MC1:L1:LINE|135|+,+	WBP2NL,+	0.334319	0.0496554
